# Supplementary material for: iTRAQ-Based Quantitative Proteomics Analysis of the Protective Effect of Yinchenwuling Powder on Hyperlipidemic Rats
Source: Evid Based Complement Alternat Med. 2017 Aug 14;2017:3275096. doi: 10.1155/2017/3275096 (PMC5573101; doi:10.1155/2017/3275096)
Supplement: Supplementary file 1 — Supplementary Table 1 desciribes the differentially expressed proteins in detail. It contains “the total proteins”, “proteins with a C.V of less than 0.5”, “proteins upregulated by more than 1.3-fold”, “proteins downregulated by less than 0.769-fold”, “proteins upregulated by more than 1.5-fold”, and “proteins downregulated by less than 0.667-fold”. [file 3275096.f1.xlsx]

## Sheet: Total proteins
N	Unused	Total	%Cov	%Cov(50)	%Cov(95)	Accession	Name	Species	Peptides(95%)	115:113	119:113	115:116	119:116	C.V	AVG.
1	441.85	441.85	87.53	81.8	73.78	tr|E9PTU4|E9PTU4_RAT	Myosin-11 OS=Rattus norvegicus GN=Myh11 PE=1 SV=2	RAT	670	0.887156	1.51356	0.625173	1.10662	0.315119	1.03313
2	424.73	420.59	90.94	86.24	82.3	tr|C0JPT7|C0JPT7_RAT	Filamin alpha OS=Rattus norvegicus GN=Flna PE=1 SV=1	RAT	679	1	1	1	1	0	1
3	376.65	374.89	61.71	49.08	42.96	tr|Q6S3A0|Q6S3A0_RAT	Plectin OS=Rattus norvegicus GN=Plec PE=1 SV=1	RAT	209					#DIV/0!	#DIV/0!
4	355.46	354.57	56.03	47.05	40.55	tr|M0R9X8|M0R9X8_RAT	Cytoplasmic dynein 1 heavy chain 1 OS=Rattus norvegicus GN=Dync1h1 PE=1 SV=2	RAT	210	0.879023	0.92045	0.855067	0.895365	0.0268505	0.887476
5	329.91	332.91	79.71	73.67	67.74	tr|A0A0G2JUA5|A0A0G2JUA5_RAT	Protein Ahnak OS=Rattus norvegicus GN=Ahnak PE=1 SV=1	RAT	237	1.14815	0.630957	0.855067	0.469894	0.328214	0.776018
6	302.64	304.26	58.58	49.9	43.81	tr|F1M705|F1M705_RAT	Dystrophin OS=Rattus norvegicus GN=Dmd PE=1 SV=3	RAT	189	1.07647	0.981748	1.00925	0.928966	0.0532177	0.999108
7	294.78	296.04	82.09	76.86	69.62	tr|G3V852|G3V852_RAT	Protein Tln1 OS=Rattus norvegicus GN=Tln1 PE=1 SV=1	RAT	339	1.0666	0.954993	0.954993	0.855067	0.0781323	0.957912
8	220.29	240.52	53.82	44.69	39.02	tr|G3V7L1|G3V7L1_RAT	Protein Utrn OS=Rattus norvegicus GN=Utrn PE=1 SV=3	RAT	154	0.981748	1.0666	0.963829	1.04713	0.0424361	1.01483
9	202.66	208.26	90.81	87.34	78.71	sp|P85972|VINC_RAT	Vinculin OS=Rattus norvegicus GN=Vcl PE=1 SV=1	RAT	294	0.691831	1.57036	0.413047	0.912011	0.476336	0.896813
10	192.78	193.51	39.71	32.96	27.46	tr|G3V928|G3V928_RAT	Protein Lrp1 OS=Rattus norvegicus GN=Lrp1 PE=1 SV=1	RAT	125	0.990832	1.03753	0.963829	1.00925	0.0268505	1.00036
11	192.63	192.57	65.46	60.51	56.92	tr|F1LTJ5|F1LTJ5_RAT	Uncharacterized protein OS=Rattus norvegicus GN=Hspg2 PE=1 SV=3	RAT	216	1.00925	0.903649	1.07647	0.963829	0.0639477	0.988299
12	191.59	277.15	77.55	68.57	59.54	tr|G3V6P7|G3V6P7_RAT	Myosin, heavy polypeptide 9, non-muscle OS=Rattus norvegicus GN=Myh9 PE=1 SV=1	RAT	258	1.03753	1.1695	0.879023	0.990832	0.102176	1.01922
13	184.53	185.58	59.37	51.53	45.4	tr|G3V9M6|G3V9M6_RAT	Fibrillin 1, isoform CRA_a OS=Rattus norvegicus GN=Fbn1 PE=1 SV=1	RAT	223	0.903649	0.654636	1.04713	0.758578	0.176305	0.840998
14	182.38	188.46	37.95	26.82	18.87	sp|Q7TMA5|APOB_RAT	Apolipoprotein B-100 OS=Rattus norvegicus GN=Apob PE=1 SV=1	RAT	101	0.824138	0.990832	0.691831	0.831764	0.126951	0.834641
15	181.75	181.81	62.78	55.55	51.39	tr|A0A096P6L8|A0A096P6L8_RAT	Fibronectin OS=Rattus norvegicus GN=Fn1 PE=1 SV=2	RAT	171	1.25893	1.00925	1.34276	1.08643	0.113053	1.17434
16	171.55	214.03	57.78	50.46	45.12	tr|A0A0H2UHR7|A0A0H2UHR7_RAT	Filamin-C OS=Rattus norvegicus GN=Flnc PE=1 SV=1	RAT	146	1.55597	1.35519	1.41906	1.23595	0.0829723	1.39154
17	168.93	168.87	93.87	88.07	82.39	tr|Q6T487|Q6T487_RAT	Alpha-actinin-1 OS=Rattus norvegicus GN=Actn1 PE=1 SV=1	RAT	226	1.31826	1.27057	1.00925	0.963829	0.136511	1.14048
18	163.67	264.78	77.88	69.69	59.82	tr|G3V9Y1|G3V9Y1_RAT	Myosin, heavy polypeptide 10, non-muscle, isoform CRA_b OS=Rattus norvegicus GN=Myh10 PE=1 SV=1	RAT	216	0.981748	0.83946	0.870964	0.751623	0.095616	0.860949
19	163.45	165.71	71.26	64.82	53.46	tr|M0RBF1|M0RBF1_RAT	Complement C3 OS=Rattus norvegicus GN=C3 PE=1 SV=1	RAT	126	0.487529	0.296483	0.597035	0.363078	0.264912	0.436031
20	162.4	171.21	59.46	44.92	36.32	tr|A0A0G2JZ69|A0A0G2JZ69_RAT	Spectrin alpha chain, non-erythrocytic 1 OS=Rattus norvegicus GN=Sptan1 PE=1 SV=1	RAT	97	1.43219	1.27057	1.28233	1.13763	0.0814501	1.28068
21	149.45	152.6	66.08	59.38	54.07	tr|G3V7Q7|G3V7Q7_RAT	IQ motif containing GTPase activating protein 1 (Predicted), isoform CRA_b OS=Rattus norvegicus GN=Iqgap1 PE=1 SV=1	RAT	129	1.10662	0.954993	0.990832	0.862979	0.0891563	0.978857
22	138.11	139.68	56.63	50.76	47.62	tr|F1LN42|F1LN42_RAT	Protein Tns1 OS=Rattus norvegicus GN=Tns1 PE=1 SV=2	RAT	120	0.772681	0.758578	0.751623	0.737904	0.0166038	0.755196
23	136.38	139.53	65.97	58.57	49.73	tr|F1M779|F1M779_RAT	Clathrin heavy chain OS=Rattus norvegicus GN=Cltc PE=1 SV=1	RAT	132	0.824138	0.744732	0.831764	0.758578	0.0488163	0.789803
24	133.69	136.52	90.63	86.68	81.74	sp|P02770|ALBU_RAT	Serum albumin OS=Rattus norvegicus GN=Alb PE=1 SV=2	RAT	172	0.787046	0.515229	2.12814	1.39316	0.514218	1.20589
25	131.75	134.37	53.11	46.24	39.01	tr|F1LRL9|F1LRL9_RAT	Microtubule-associated protein 1B OS=Rattus norvegicus GN=Map1b PE=1 SV=1	RAT	97	0.981748	0.772681	0.751623	0.591562	0.179099	0.774403
26	131.42	132.28	97.61	95.49	93.1	sp|P62738|ACTA_RAT	Actin, aortic smooth muscle OS=Rattus norvegicus GN=Acta2 PE=2 SV=1	RAT	660	0.737904	0.847227	0.816582	0.937562	0.0856183	0.834819
27	126.88	129.34	49.33	42.12	37	tr|F1M155|F1M155_RAT	Protein Svil OS=Rattus norvegicus GN=Svil PE=1 SV=3	RAT	79	0.809096	0.855067	0.744732	0.787046	0.0498021	0.798985
28	126.2	127.78	50.64	47.21	43.12	sp|Q00657|CSPG4_RAT	Chondroitin sulfate proteoglycan 4 OS=Rattus norvegicus GN=Cspg4 PE=1 SV=2	RAT	106	0.912011	1.22462	1	1.34276	0.153522	1.11985
29	123.33	124.41	87.22	81.95	75.64	tr|G3V8L3|G3V8L3_RAT	Lamin A, isoform CRA_b OS=Rattus norvegicus GN=Lmna PE=1 SV=1	RAT	172	0.946237	0.990832	0.895365	0.937562	0.0359652	0.942499
30	122.91	125.23	44.27	33.19	24.33	tr|F1LQX8|F1LQX8_RAT	Inositol 1,4,5-trisphosphate receptor type 1 OS=Rattus norvegicus GN=Itpr1 PE=1 SV=3	RAT	76	1.38038	1.09648	1.25893	1	0.123629	1.18395
31	117.93	120.72	46.67	37.64	28.82	sp|P12785|FAS_RAT	Fatty acid synthase OS=Rattus norvegicus GN=Fasn PE=1 SV=3	RAT	73	3.56451	3.04789	3.69828	3.16228	0.080283	3.36824
32	117.42	132.61	31.97	18.54	11.16	tr|A0A0G2K9T4|A0A0G2K9T4_RAT	Microtubule-actin cross-linking factor 1 OS=Rattus norvegicus GN=Macf1 PE=1 SV=1	RAT	89	1.05682	1.02802	1.28233	1.25893	0.0993128	1.15652
33	115.15	119.98	49.32	41.89	33.79	tr|D4ACN7|D4ACN7_RAT	Protein Myof OS=Rattus norvegicus GN=Myof PE=1 SV=2	RAT	65	1.34276	1.1272	1.2942	1.08643	0.0892125	1.21265
34	113.01	124.87	47.54	35.4	27.55	tr|G3V6S0|G3V6S0_RAT	Protein Sptbn1 OS=Rattus norvegicus GN=Sptbn1 PE=1 SV=3	RAT	69	1.38038	1.40605	1.23595	1.25893	0.0559711	1.32033
35	108.15	111.71	75.1	65.04	57.95	sp|Q63355|MYO1C_RAT	Unconventional myosin-Ic OS=Rattus norvegicus GN=Myo1c PE=1 SV=2	RAT	98	1	0.855067	1.01859	0.870964	0.0786726	0.936155
36	107.71	112.39	50.28	43.31	38.39	tr|F1MAA7|F1MAA7_RAT	Protein Lamc1 OS=Rattus norvegicus GN=Lamc1 PE=1 SV=1	RAT	76	0.912011	0.954993	0.928966	0.972747	0.0247966	0.942179
37	106.04	105.75	48.55	38.04	30.34	tr|D3ZFU9|D3ZFU9_RAT	Protein Mylk OS=Rattus norvegicus GN=Mylk PE=1 SV=2	RAT	113	0.895365	1.00925	0.765597	0.855067	0.0993156	0.88132
38	101.59	104.07	65.78	58.84	53.63	tr|A0A0G2QC06|A0A0G2QC06_RAT	Serotransferrin OS=Rattus norvegicus GN=Tf PE=1 SV=1	RAT	97	0.946237	1	0.972747	1.02802	0.0308881	0.98675
39	99.56	100.62	82.32	77.41	70.43	tr|Q6IMZ3|Q6IMZ3_RAT	Annexin OS=Rattus norvegicus GN=Anxa6 PE=1 SV=1	RAT	97	1.14815	0.928966	1.13763	0.92045	0.105626	1.0338
40	98.56	102.28	42.74	33.83	27.93	tr|A0A0G2K7B6|A0A0G2K7B6_RAT	Protein Dysf OS=Rattus norvegicus GN=Dysf PE=1 SV=1	RAT	55	1.52757	1.10662	1.58489	1.13763	0.162989	1.33918
41	97.94	103.2	62.78	53.08	42.9	tr|Q3KRF2|Q3KRF2_RAT	High density lipoprotein binding protein (Vigilin) OS=Rattus norvegicus GN=Hdlbp PE=1 SV=1	RAT	57	0.855067	1	0.862979	1.01859	0.080795	0.934159
42	94.83	97.3	29.98	22.38	17.86	tr|F1MAN8|F1MAN8_RAT	Laminin, alpha 5, isoform CRA_a OS=Rattus norvegicus GN=Lama5 PE=1 SV=2	RAT	61	1.0666	1.1695	1.02802	1.1272	0.0495755	1.09783
43	94.41	95.3	84.09	77.07	71.76	sp|P0DMW1|HS71B_RAT	Heat shock 70 kDa protein 1B OS=Rattus norvegicus GN=Hspa1a PE=2 SV=1	RAT	121	1.14815	1.31826	1.01859	1.1695	0.0913735	1.16363
44	94.14	94.39	51.6	46.2	38.67	sp|Q63041|A1M_RAT	Alpha-1-macroglobulin OS=Rattus norvegicus GN=A1m PE=1 SV=1	RAT	71	1.01859	0.613762	1.1272	0.679204	0.253427	0.859689
45	93.88	100.8	87.12	84.76	81.33	sp|P31000|VIME_RAT	Vimentin OS=Rattus norvegicus GN=Vim PE=1 SV=2	RAT	174	0.928966	1.14815	0.744732	0.903649	0.154292	0.931375
46	89.89	91.83	57.82	49.63	42.45	sp|P14046|A1I3_RAT	Alpha-1-inhibitor 3 OS=Rattus norvegicus GN=A1i3 PE=1 SV=1	RAT	89	0.60256	0.60256	0.636796	0.636796	0.027624	0.619678
47	89.72	89.77	90.24	84.71	82.5	sp|Q4V8H8|EHD2_RAT	EH domain-containing protein 2 OS=Rattus norvegicus GN=Ehd2 PE=1 SV=1	RAT	96	1.59956	1.27057	0.972747	0.794328	0.263836	1.1593
48	89.6	100.76	57.13	46.33	33.57	tr|A0A0G2K5N6|A0A0G2K5N6_RAT	Rho-associated protein kinase OS=Rattus norvegicus GN=Rock2 PE=1 SV=1	RAT	60	1.24738	1.22462	1.2942	1.28233	0.0219179	1.26213
49	86.56	89.52	46.75	34.48	29.43	tr|M0R6K0|M0R6K0_RAT	Laminin subunit beta-2 OS=Rattus norvegicus GN=Lamb2 PE=1 SV=1	RAT	59	1.00925	1.01859	0.963829	0.972747	0.0234781	0.991105
50	86.38	89.18	65.91	60.37	50.81	tr|D4ABA5|D4ABA5_RAT	Protein Smtn OS=Rattus norvegicus GN=Smtn PE=1 SV=1	RAT	76	0.981748	0.981748	0.963829	0.972747	0.00762233	0.975018
51	85.58	90.97	53.68	44.44	39.22	tr|G3V6T1|G3V6T1_RAT	Coatomer subunit alpha OS=Rattus norvegicus GN=Copa PE=1 SV=1	RAT	55	1.04713	1.08643	0.954993	0.981748	0.0510971	1.01757
52	84.9	139.87	47.32	40.05	30.84	tr|D3ZA84|D3ZA84_RAT	Protein Tln2 OS=Rattus norvegicus GN=Tln2 PE=1 SV=3	RAT	100	0.937562	0.816582	1.03753	0.903649	0.0856183	0.923831
53	83.75	87.94	67.31	61.67	54.62	sp|Q68FP1|GELS_RAT	Gelsolin OS=Rattus norvegicus GN=Gsn PE=1 SV=1	RAT	102	1	0.879023	0.855067	0.758578	0.0984842	0.873167
54	83.67	84.04	64.34	55.86	45.4	tr|D4A702|D4A702_RAT	Protein Synpo2 OS=Rattus norvegicus GN=Synpo2 PE=1 SV=2	RAT	74	0.928966	0.724436	0.824138	0.642688	0.137596	0.780057
55	83.45	88.24	70.68	62.59	57.35	sp|Q9Z1X1|ESYT1_RAT	Extended synaptotagmin-1 OS=Rattus norvegicus GN=Esyt1 PE=1 SV=1	RAT	71	0.895365	1	1.02802	1.14815	0.0884237	1.01788
56	83.07	85.29	45.15	38.09	29.67	tr|G3V9G5|G3V9G5_RAT	Protein Synm OS=Rattus norvegicus GN=Synm PE=1 SV=2	RAT	51	1.00925	0.963829	0.946237	0.903649	0.0396107	0.955742
57	82.95	90.35	59.19	48.52	33.72	tr|F1M853|F1M853_RAT	Protein Rrbp1 OS=Rattus norvegicus GN=Rrbp1 PE=1 SV=3	RAT	52	1.02802	0.990832	1.09648	1.05682	0.0371221	1.04304
58	81.89	83.59	79.9	70.88	63.6	tr|A0A096MK30|A0A096MK30_RAT	Moesin OS=Rattus norvegicus GN=Msn PE=1 SV=1	RAT	70	1.09648	1.31826	1.02802	1.23595	0.0973781	1.16967
59	80.9	82.03	41.29	32.04	23.75	tr|F1LTF8|F1LTF8_RAT	Protein Lama4 OS=Rattus norvegicus GN=Lama4 PE=1 SV=3	RAT	53	0.895365	0.972747	0.895365	0.981748	0.0438584	0.936306
60	79.24	83.15	72.79	65.33	55.66	sp|P34058|HS90B_RAT	Heat shock protein HSP 90-beta OS=Rattus norvegicus GN=Hsp90ab1 PE=1 SV=4	RAT	80	0.831764	1.1272	0.816582	1.10662	0.151099	0.970542
61	79.04	98.64	28.14	14.98	7.015	tr|D3ZC56|D3ZC56_RAT	Protein Dst OS=Rattus norvegicus GN=Dst PE=1 SV=3	RAT	61	1.21339	1.08643	1.47231	1.31826	0.111223	1.2726
62	77.28	77.36	69.09	59.43	51.31	sp|P53534|PYGB_RAT	Glycogen phosphorylase, brain form (Fragment) OS=Rattus norvegicus GN=Pygb PE=1 SV=3	RAT	71	1.35519	1.11686	1.11686	0.92045	0.136658	1.12734
63	76.72	82.34	74.16	70.34	63.61	sp|P06761|GRP78_RAT	78 kDa glucose-regulated protein OS=Rattus norvegicus GN=Hspa5 PE=1 SV=1	RAT	79	0.937562	1.30617	0.847227	1.15878	0.170072	1.06243
64	76.71	78.86	89.64	82.49	76.46	sp|P11980|KPYM_RAT	Pyruvate kinase PKM OS=Rattus norvegicus GN=Pkm PE=1 SV=3	RAT	64	1.23595	1.23595	1.02802	1.01859	0.0941675	1.12963
65	76.22	81.99	60.97	53.4	43.17	tr|D4A8U7|D4A8U7_RAT	Dynactin 1, isoform CRA_a OS=Rattus norvegicus GN=Dctn1 PE=1 SV=2	RAT	45	1.20226	1.09648	1.00925	0.928966	0.0959437	1.05924
66	75.74	81.36	74.69	62.42	50.79	tr|A0A0G2JTV2|A0A0G2JTV2_RAT	Non-muscle caldesmon OS=Rattus norvegicus GN=Cald1 PE=1 SV=1	RAT	83	0.990832	1.00925	0.963829	0.981748	0.0166038	0.986415
67	75.5	81.2	41.34	30.85	22.33	tr|M3ZCQ2|M3ZCQ2_RAT	U5 small nuclear ribonucleoprotein 200 kDa helicase OS=Rattus norvegicus GN=Snrnp200 PE=1 SV=1	RAT	47	0.990832	0.972747	0.963829	0.954993	0.0136623	0.9706
68	75.22	85.66	37.85	30.18	25.76	tr|D3ZQN7|D3ZQN7_RAT	Protein Lamb1 OS=Rattus norvegicus GN=Lamb1 PE=1 SV=3	RAT	59	0.903649	0.862979	1.01859	0.972747	0.0640893	0.939492
69	75.11	75.55	69.46	65.4	54	sp|O08590|AOC3_RAT	Membrane primary amine oxidase OS=Rattus norvegicus GN=Aoc3 PE=1 SV=4	RAT	93	1	1.05682	0.972747	1.03753	0.0320732	1.01677
70	75.05	75.39	52.15	44.45	37.41	tr|G3V9R2|G3V9R2_RAT	Protein Cfh OS=Rattus norvegicus GN=Cfh PE=1 SV=1	RAT	56	0.57544	0.401791	0.765597	0.534564	0.22873	0.569348
71	74.67	77.33	48.68	37.92	31.43	tr|G3V8G5|G3V8G5_RAT	Golgi apparatus protein 1 OS=Rattus norvegicus GN=Glg1 PE=1 SV=1	RAT	46	1.04713	1.15878	0.954993	1.04713	0.0686438	1.05201
72	73.68	76.33	37.3	27.02	18.24	tr|G3V6H2|G3V6H2_RAT	Pre-mRNA processing factor 8, isoform CRA_a OS=Rattus norvegicus GN=Prpf8 PE=1 SV=1	RAT	48	0.972747	0.92045	0.990832	0.928966	0.0308449	0.953249
73	73.32	74.67	54.84	49.07	43.6	sp|P06685|AT1A1_RAT	Sodium/potassium-transporting ATPase subunit alpha-1 OS=Rattus norvegicus GN=Atp1a1 PE=1 SV=1	RAT	61	1.09648	1.21339	0.855067	0.946237	0.133803	1.02779
74	73.01	75.35	64.8	53.38	46.15	sp|P05197|EF2_RAT	Elongation factor 2 OS=Rattus norvegicus GN=Eef2 PE=1 SV=4	RAT	53	0.903649	1.18032	1.00925	1.28233	0.134304	1.09389
75	72.84	74.47	38.51	32.99	26.08	sp|P08649|CO4_RAT	Complement C4 OS=Rattus norvegicus GN=C4 PE=1 SV=3	RAT	46	0.420727	0.359749	0.559758	0.483059	0.162722	0.455823
76	72.71	75.65	77.02	69.4	57.5	tr|F1LRV4|F1LRV4_RAT	Heat shock 70 kDa protein 4 OS=Rattus norvegicus GN=Hspa4 PE=1 SV=1	RAT	58	1.0666	1.20226	0.990832	1.1272	0.0709047	1.09672
77	72.25	76.53	58.07	48.04	41.22	tr|E9PSX6|E9PSX6_RAT	Calcium-transporting ATPase OS=Rattus norvegicus GN=Atp2a2 PE=1 SV=3	RAT	55	1.10662	0.801678	1.09648	0.801678	0.157605	0.951615
78	72.17	76.37	56.91	39.69	28.63	tr|F1LUA1|F1LUA1_RAT	Protein Eea1 OS=Rattus norvegicus GN=Eea1 PE=1 SV=1	RAT	42	0.981748	0.972747	1.00925	1	0.0145621	0.990937
79	72.12	73.45	38.52	30.66	26.59	tr|D3ZZT9|D3ZZT9_RAT	Protein Col14a1 OS=Rattus norvegicus GN=Col14a1 PE=1 SV=3	RAT	48	0.963829	1.10662	0.737904	0.855067	0.148567	0.915856
80	71.76	72.78	50.97	44.37	37.57	tr|G3V8Y8|G3V8Y8_RAT	Huntingtin interacting protein 1, isoform CRA_a OS=Rattus norvegicus GN=Hip1 PE=1 SV=1	RAT	45	0.972747	0.990832	0.981748	1	0.0102973	0.986332
81	71.06	74.49	69.5	65.61	51.22	tr|A0A0G2JWC7|A0A0G2JWC7_RAT	Protein Fermt2 OS=Rattus norvegicus GN=Fermt2 PE=1 SV=1	RAT	67	0.912011	0.928966	0.772681	0.787046	0.0832185	0.850176
82	70.51	71.72	86.08	75.23	67.45	sp|P15999|ATPA_RAT	ATP synthase subunit alpha, mitochondrial OS=Rattus norvegicus GN=Atp5a1 PE=1 SV=2	RAT	86	0.972747	1.33045	0.724436	0.990832	0.214577	1.00462
83	69.95	71.78	47.42	35.05	26.52	tr|A0A0G2JZI2|A0A0G2JZI2_RAT	Protein Eprs OS=Rattus norvegicus GN=Eprs PE=1 SV=1	RAT	42	1.03753	1.0666	0.937562	0.963829	0.0524697	1.00138
84	69.35	77.68	66.17	56.34	53.23	tr|A0A0A0MY09|A0A0A0MY09_RAT	Endoplasmin OS=Rattus norvegicus GN=Hsp90b1 PE=1 SV=1	RAT	60	0.787046	1.04713	0.794328	1.05682	0.141875	0.92133
85	69.18	124.85	82.99	73.98	70.25	sp|Q9QXQ0|ACTN4_RAT	Alpha-actinin-4 OS=Rattus norvegicus GN=Actn4 PE=1 SV=2	RAT	153	0.83946	1.07647	0.731139	0.946237	0.142389	0.898325
86	68.37	69.14	42.55	33.08	25.79	sp|Q9JLA3|UGGG1_RAT	UDP-glucose:glycoprotein glucosyltransferase 1 OS=Rattus norvegicus GN=Uggt1 PE=1 SV=2	RAT	47	0.787046	0.847227	0.879023	0.946237	0.0663919	0.864883
87	68.2	69.56	54.53	49.09	41.32	tr|Q66HM2|Q66HM2_RAT	AP-2 complex subunit alpha-2 OS=Rattus norvegicus GN=Ap2a2 PE=1 SV=1	RAT	43	1.03753	1.1272	0.972747	1.05682	0.0524984	1.04857
88	68.14	79.02	96.83	94.37	84.51	tr|A0A0G2JX64|A0A0G2JX64_RAT	Tropomyosin 1, alpha, isoform CRA_i OS=Rattus norvegicus GN=Tpm1 PE=1 SV=1	RAT	92	1.00925	0.972747	0.972747	0.937562	0.0260501	0.973077
89	68.11	71.26	81.9	71.75	65.56	tr|F1LPK7|F1LPK7_RAT	Plastin 3 (T-isoform), isoform CRA_a OS=Rattus norvegicus GN=Pls3 PE=1 SV=2	RAT	61	0.981748	1.24738	0.855067	1.08643	0.137929	1.04266
90	67.54	73.41	42.23	26.35	18.79	tr|F7FF45|F7FF45_RAT	Protein Numa1 OS=Rattus norvegicus GN=Numa1 PE=1 SV=2	RAT	43	1.1695	0.765597	1.21339	0.787046	0.211691	0.983883
91	67.54	68.96	60.79	54.66	51.9	tr|Q9WVJ6|Q9WVJ6_RAT	Protein Tgm2 OS=Rattus norvegicus GN=Tgm2 PE=1 SV=1	RAT	53	0.580764	0.469894	0.642688	0.515229	0.118574	0.552144
92	67.49	68.92	80.03	71.12	63.2	sp|Q5RKI0|WDR1_RAT	WD repeat-containing protein 1 OS=Rattus norvegicus GN=Wdr1 PE=1 SV=3	RAT	58	1.39316	1.45881	1.20226	1.25893	0.0770871	1.32829
93	67.14	98.78	83.75	74.77	68.89	sp|P63018|HSP7C_RAT	Heat shock cognate 71 kDa protein OS=Rattus norvegicus GN=Hspa8 PE=1 SV=1	RAT	144	1.02802	1.95884	0.847227	1.65959	0.329826	1.37342
94	67.12	74.22	73.08	60.82	55.88	tr|G3V7U4|G3V7U4_RAT	Lamin-B1 OS=Rattus norvegicus GN=Lmnb1 PE=1 SV=1	RAT	52	0.972747	0.787046	0.855067	0.685488	0.12659	0.825087
95	66.41	67.38	35.34	29.38	26.82	tr|A0A0G2K1G5|A0A0G2K1G5_RAT	Latent transforming growth factor beta binding protein 2, isoform CRA_a OS=Rattus norvegicus GN=Ltbp2 PE=1 SV=1	RAT	52	0.672977	0.801678	0.895365	1.07647	0.170649	0.861621
96	66.21	66.87	56.56	52.72	47.07	sp|Q9ESN0|NIBAN_RAT	Protein Niban OS=Rattus norvegicus GN=Fam129a PE=1 SV=2	RAT	58	1.99526	1.5417	1.25893	0.990832	0.257021	1.44668
97	66.02	71.66	61.03	49.8	37.08	sp|Q63357|MYO1D_RAT	Unconventional myosin-Id OS=Rattus norvegicus GN=Myo1d PE=1 SV=3	RAT	40	1	0.990832	0.855067	0.83946	0.0807001	0.92134
98	65.36	69.56	61.18	54.87	45.95	tr|F1M3D3|F1M3D3_RAT	Heterogeneous nuclear ribonucleoprotein M OS=Rattus norvegicus GN=Hnrnpm PE=1 SV=1	RAT	37	1.07647	0.831764	0.990832	0.772681	0.132274	0.917935
99	65.05	68.34	78.32	70.25	65.59	sp|P10860|DHE3_RAT	Glutamate dehydrogenase 1, mitochondrial OS=Rattus norvegicus GN=Glud1 PE=1 SV=2	RAT	65	0.981748	1.67494	0.887156	1.51356	0.266116	1.26435
100	64.86	64.93	77.42	74.8	72.78	tr|F1LRJ9|F1LRJ9_RAT	Selenium-binding protein 1 OS=Rattus norvegicus GN=Selenbp1 PE=1 SV=2	RAT	64	0.903649	0.724436	0.772681	0.625173	0.132504	0.756485
101	64.68	65.21	58.31	50.5	42.46	sp|Q66X93|SND1_RAT	Staphylococcal nuclease domain-containing protein 1 OS=Rattus norvegicus GN=Snd1 PE=1 SV=1	RAT	45	1.02802	1.07647	1.01859	1.0666	0.0234781	1.04742
102	64.5	72.17	50.08	37.1	29.68	tr|D4A900|D4A900_RAT	Protein Filip1l OS=Rattus norvegicus GN=Filip1l PE=1 SV=2	RAT	42	0.954993	0.990832	0.972747	1.01859	0.0238856	0.984291
103	64.45	68.17	51.98	45.56	41.12	sp|Q5U300|UBA1_RAT	Ubiquitin-like modifier-activating enzyme 1 OS=Rattus norvegicus GN=Uba1 PE=1 SV=1	RAT	50	0.870964	0.963829	0.862979	0.963829	0.0529946	0.9154
104	64.36	65.34	69.46	61.34	52.96	tr|A0A0G2JVH4|A0A0G2JVH4_RAT	MICOS complex subunit Mic60 OS=Rattus norvegicus GN=Immt PE=1 SV=1	RAT	46	1.00925	1.11686	0.772681	0.847227	0.143886	0.936506
105	64.19	68.76	73.57	65.26	57.57	sp|P46462|TERA_RAT	Transitional endoplasmic reticulum ATPase OS=Rattus norvegicus GN=Vcp PE=1 SV=3	RAT	55	1.00925	1.27057	0.847227	1.04713	0.144753	1.04355
106	64.15	67.92	55.12	50.71	46.67	tr|D4ACC2|D4ACC2_RAT	Protein Kank2 OS=Rattus norvegicus GN=Kank2 PE=1 SV=2	RAT	44	1.02802	0.787046	1.00925	0.772681	0.133086	0.899249
107	63.85	66.98	24.76	17.93	13.22	sp|Q9ERB4|CSPG2_RAT	Versican core protein (Fragments) OS=Rattus norvegicus GN=Vcan PE=2 SV=2	RAT	53	1.40605	0.946237	0.990832	0.672977	0.261023	1.00402
108	63.83	67.84	33.3	22.73	15.57	sp|P11497|ACACA_RAT	Acetyl-CoA carboxylase 1 OS=Rattus norvegicus GN=Acaca PE=1 SV=1	RAT	37	1.08643	1.1272	1.07647	1.11686	0.0189858	1.10174
109	63.68	71.59	32	24.42	16.18	tr|D3ZC84|D3ZC84_RAT	Protein Usp9x OS=Rattus norvegicus GN=Usp9x PE=1 SV=1	RAT	46	1.00925	0.990832	1.01859	1	0.0102973	1.00467
110	63.58	67.19	39.86	31.71	26.26	sp|O88280|SLIT3_RAT	Slit homolog 3 protein OS=Rattus norvegicus GN=Slit3 PE=2 SV=1	RAT	38	1.05682	1.24738	1.08643	1.27057	0.0811959	1.1653
111	63.1	64.45	54	47.67	42.87	tr|F1LR02|F1LR02_RAT	Procollagen, type XVIII, alpha 1, isoform CRA_a OS=Rattus norvegicus GN=Col18a1 PE=1 SV=2	RAT	98	1.49968	1.57036	1.58489	1.61436	0.0268906	1.56732
112	63.02	63.97	44.94	38.2	33.72	tr|D4A917|D4A917_RAT	Protein Ltbp4 OS=Rattus norvegicus GN=Ltbp4 PE=1 SV=2	RAT	58	0.787046	1.07647	0.847227	1.14815	0.156782	0.964723
113	62.53	62.6	76.03	67.98	59.14	sp|P04785|PDIA1_RAT	Protein disulfide-isomerase OS=Rattus norvegicus GN=P4hb PE=1 SV=2	RAT	51	0.765597	1.07647	0.724436	1.01859	0.171071	0.896272
114	62.44	69.65	55.3	41.95	37.92	sp|Q32PZ3|UN45A_RAT	Protein unc-45 homolog A OS=Rattus norvegicus GN=Unc45a PE=2 SV=1	RAT	44	1.11686	1.0666	1.02802	0.981748	0.0474	1.04831
115	62.29	62.51	73.53	69.41	65.69	tr|A0A0H2UHM5|A0A0H2UHM5_RAT	Protein disulfide-isomerase OS=Rattus norvegicus GN=Pdia3 PE=1 SV=1	RAT	61	0.870964	1.14815	0.636796	0.847227	0.207534	0.875785
116	61.85	68.18	46.05	37.43	29.21	tr|D4A8H8|D4A8H8_RAT	Cytoplasmic FMR1 interacting protein 1 (Predicted) OS=Rattus norvegicus GN=Cyfip1 PE=1 SV=1	RAT	40	1.05682	1.0666	0.887156	0.903649	0.0852563	0.978555
117	61.81	78.44	84.65	75.69	74.2	tr|Q6P725|Q6P725_RAT	Desmin OS=Rattus norvegicus GN=Des PE=1 SV=1	RAT	108	1.8197	0.887156	2.58226	1.2942	0.385042	1.64583
118	61.72	64.33	42.64	33.88	29.3	tr|F1M820|F1M820_RAT	Sorbin and SH3 domain-containing protein 1 OS=Rattus norvegicus GN=Sorbs1 PE=1 SV=1	RAT	45	1	0.685488	1.00925	0.685488	0.188866	0.845057
119	61.54	65.03	51.45	44.28	35.17	tr|A0A0G2JWJ0|A0A0G2JWJ0_RAT	Protein phosphatase 1 regulatory subunit OS=Rattus norvegicus GN=Ppp1r12a PE=1 SV=1	RAT	44	1.01859	0.824138	0.765597	0.630957	0.172146	0.809821
120	61.44	63.86	45.57	36.55	30.38	sp|Q04462|SYVC_RAT	Valine--tRNA ligase OS=Rattus norvegicus GN=Vars PE=2 SV=2	RAT	33	0.963829	0.972747	0.981748	0.981748	0.00762233	0.975018
121	61.36	62.42	49.76	42.47	38	tr|G3V9F3|G3V9F3_RAT	Myosin phosphatase Rho-interacting protein OS=Rattus norvegicus GN=Mprip PE=1 SV=1	RAT	34	0.744732	0.847227	0.731139	0.83946	0.0670267	0.79064
122	61.32	62.31	46.31	39.57	36.76	tr|F1LM84|F1LM84_RAT	Nidogen-1 OS=Rattus norvegicus GN=Nid1 PE=1 SV=1	RAT	45	0.946237	0.903649	0.928966	0.879023	0.0278416	0.914469
123	61.08	61.89	80.42	73.37	66.31	tr|D3ZVR9|D3ZVR9_RAT	Protein Pgm5 OS=Rattus norvegicus GN=Pgm5 PE=1 SV=3	RAT	76	0.436516	1.55597	0.316228	1.07647	0.592434	0.846294
124	60.9	61.72	54	44.55	38.94	sp|Q2PQA9|KINH_RAT	Kinesin-1 heavy chain OS=Rattus norvegicus GN=Kif5b PE=1 SV=1	RAT	37	1	0.990832	1	1	0.00397899	0.997708
125	60.45	60.93	60.43	55.68	50.58	sp|P02454|CO1A1_RAT	Collagen alpha-1(I) chain OS=Rattus norvegicus GN=Col1a1 PE=1 SV=5	RAT	139	1.00925	0.963829	1.00925	0.963829	0.0230218	0.986541
126	60.44	60.6	82.37	81.03	71.43	sp|Q9WVH8|FBLN5_RAT	Fibulin-5 OS=Rattus norvegicus GN=Fbln5 PE=2 SV=1	RAT	113	0.619441	1.01859	0.428549	0.704693	0.307453	0.692819
127	60.02	61.69	39.36	29.63	26.44	tr|D4AEH9|D4AEH9_RAT	Amylo-1, 6-glucosidase, 4-alpha-glucanotransferase (Glycogen debranching enzyme, glycogen storage disease type III) (Predicted), isoform CRA_a OS=Rattus norvegicus GN=Agl PE=1 SV=1	RAT	37	0.972747	1.00925	1	1.02802	0.0198761	1.0025
128	59.67	86.17	49.67	39.88	30.97	tr|D4A5S0|D4A5S0_RAT	Rho-associated protein kinase OS=Rattus norvegicus GN=Rock1 PE=1 SV=3	RAT	55	0.937562	1.04713	1.11686	1.25893	0.106912	1.09012
129	59.51	61.46	49.08	38.12	31.4	tr|Q5BJZ3|Q5BJZ3_RAT	Nicotinamide nucleotide transhydrogenase OS=Rattus norvegicus GN=Nnt PE=1 SV=1	RAT	41	0.895365	0.816582	0.772681	0.711214	0.0839488	0.79896
130	59.5	62.15	49.59	41.06	35.56	tr|Q9ERS3|Q9ERS3_RAT	Voltage-dependent calcium channel subunit alpha-2/delta-1 OS=Rattus norvegicus GN=Cacna2d1 PE=1 SV=1	RAT	51	0.824138	0.772681	0.758578	0.711214	0.0524984	0.766652
131	59.45	59.56	92.03	85.99	81.59	sp|P05065|ALDOA_RAT	Fructose-bisphosphate aldolase A OS=Rattus norvegicus GN=Aldoa PE=1 SV=2	RAT	76	1.13763	1.2942	0.809096	0.912011	0.182643	1.03823
132	59.35	62.84	52.69	41.75	34.47	tr|D3ZH00|D3ZH00_RAT	Calcium-transporting ATPase OS=Rattus norvegicus GN=Atp2b4 PE=1 SV=3	RAT	55	1.0666	0.711214	1.02802	0.672977	0.205405	0.869701
133	59.24	61.75	33.73	24.09	16.89	tr|A0A096P6L9|A0A096P6L9_RAT	Complement C5 OS=Rattus norvegicus GN=C5 PE=1 SV=2	RAT	33	0.559758	0.416869	0.666807	0.496592	0.170839	0.535007
134	59.13	64.07	47.05	33.69	22.92	tr|F1LM33|F1LM33_RAT	Leucine-rich PPR motif-containing protein, mitochondrial OS=Rattus norvegicus GN=Lrpprc PE=1 SV=2	RAT	41	1.18032	1.04713	1.00925	0.895365	0.0984957	1.03302
135	59.06	61.26	43.3	38.33	36.11	tr|A0A0H2UHL3|A0A0H2UHL3_RAT	Adipocyte enhancer-binding protein 1 OS=Rattus norvegicus GN=Aebp1 PE=4 SV=1	RAT	62	1.04713	0.928966	1.10662	0.981748	0.0658889	1.01612
136	58.65	73.09	23.47	12.48	6.854	tr|F1LQI5|F1LQI5_RAT	E3 ubiquitin-protein ligase UBR4 OS=Rattus norvegicus GN=Ubr4 PE=1 SV=1	RAT	40	1.10662	1.1272	1.39316	1.40605	0.112542	1.25826
137	58.52	64.87	55.78	39.64	33.42	tr|D3ZKE6|D3ZKE6_RAT	Sarcolemma associated protein (Predicted) OS=Rattus norvegicus GN=Slmap PE=1 SV=1	RAT	41	0.972747	0.981748	0.963829	0.972747	0.00651267	0.972768
138	58.44	61.41	50.89	42.48	36.7	tr|Q3ZB97|Q3ZB97_RAT	AP complex subunit beta OS=Rattus norvegicus GN=Ap2b1 PE=1 SV=1	RAT	47	0.895365	0.912011	0.824138	0.847227	0.040774	0.869685
139	58.38	62.84	62.44	54.1	49.49	sp|Q9ER34|ACON_RAT	Aconitate hydratase, mitochondrial OS=Rattus norvegicus GN=Aco2 PE=1 SV=2	RAT	50	1.21339	1.57036	1.15878	1.48594	0.12872	1.35712
140	58.25	60.49	83.55	79.58	74.86	sp|P10719|ATPB_RAT	ATP synthase subunit beta, mitochondrial OS=Rattus norvegicus GN=Atp5b PE=1 SV=2	RAT	98	0.887156	1.07647	0.77983	0.928966	0.115878	0.918104
141	58.2	63.73	54.44	46.52	40.96	tr|G3V6S5|G3V6S5_RAT	C-1-tetrahydrofolate synthase, cytoplasmic OS=Rattus norvegicus GN=Mthfd1 PE=1 SV=1	RAT	37	0.794328	0.772681	0.765597	0.744732	0.0230251	0.769334
142	58.17	61.22	54.06	43.7	35.97	sp|Q5XI78|ODO1_RAT	2-oxoglutarate dehydrogenase, mitochondrial OS=Rattus norvegicus GN=Ogdh PE=1 SV=1	RAT	36	0.981748	1.22462	1.00925	1.25893	0.11095	1.11864
143	58.17	58.54	71.17	65.88	58.76	tr|D4ACB8|D4ACB8_RAT	Chaperonin subunit 8 (Theta) (Predicted), isoform CRA_a OS=Rattus norvegicus GN=Cct8 PE=1 SV=1	RAT	39	1.03753	1.0666	0.912011	0.937562	0.0658546	0.988424
144	57.99	58.16	77.05	72.26	64.87	sp|Q62969|PTGIS_RAT	Prostacyclin synthase OS=Rattus norvegicus GN=Ptgis PE=2 SV=1	RAT	70	0.862979	1.21339	0.648634	0.879023	0.224185	0.901006
145	57.97	59.68	31.63	21.38	15.4	tr|A0A0G2KAJ7|A0A0G2KAJ7_RAT	Collagen alpha-1(XII) chain OS=Rattus norvegicus GN=Col12a1 PE=1 SV=1	RAT	42	0.946237	0.758578	1.35519	1.09648	0.210027	1.03912
146	57.45	58.5	34.8	26.69	18.64	tr|D3ZXD2|D3ZXD2_RAT	Protein Abca8 OS=Rattus norvegicus GN=Abca8a PE=1 SV=3	RAT	33	1.14815	0.92045	0.855067	0.691831	0.181194	0.903875
147	57.39	59.42	69.67	64.41	58.26	tr|A0A0G2JV31|A0A0G2JV31_RAT	X-prolyl aminopeptidase (Aminopeptidase P) 1, soluble, isoform CRA_a OS=Rattus norvegicus GN=Xpnpep1 PE=1 SV=1	RAT	56	1.25893	1.01859	0.77983	0.636796	0.256461	0.923536
148	57.11	57.32	78.65	77.55	73.91	tr|G3V7C6|G3V7C6_RAT	Tubulin beta-4B chain OS=Rattus norvegicus GN=Tubb4b PE=1 SV=2	RAT	86	0.816582	0.928966	0.685488	0.772681	0.109494	0.800929
149	56.99	61.12	51.6	33.03	26.95	tr|D4A1B9|D4A1B9_RAT	Structural maintenance of chromosomes protein OS=Rattus norvegicus GN=Smc3 PE=1 SV=1	RAT	33	0.92045	0.928966	0.972747	0.990832	0.0308449	0.953249
150	56.92	57.59	67.28	56.05	48.89	tr|D3ZAF5|D3ZAF5_RAT	Periostin, osteoblast specific factor (Predicted), isoform CRA_a OS=Rattus norvegicus GN=Postn PE=1 SV=1	RAT	61	1.09648	1.24738	1.19124	1.35519	0.0766039	1.22257
151	56.63	61.09	81.39	73.81	71.21	sp|P62630|EF1A1_RAT	Elongation factor 1-alpha 1 OS=Rattus norvegicus GN=Eef1a1 PE=2 SV=1	RAT	61	0.724436	0.77983	0.954993	1.05682	0.151692	0.879019
152	56.59	64.9	61.86	57.29	51.84	tr|F1M953|F1M953_RAT	Stress-70 protein, mitochondrial OS=Rattus norvegicus GN=Hspa9 PE=1 SV=1	RAT	47	1.00925	1.13763	0.887156	1	0.087952	1.00851
153	56.57	60.58	48.7	39.11	28.94	sp|P97536|CAND1_RAT	Cullin-associated NEDD8-dissociated protein 1 OS=Rattus norvegicus GN=Cand1 PE=1 SV=1	RAT	38	1	1.03753	0.946237	0.981748	0.0332052	0.991378
154	56.53	65.57	37.78	25.17	14.8	tr|A0A0G2JY08|A0A0G2JY08_RAT	Protein Myo18a OS=Rattus norvegicus GN=Myo18a PE=1 SV=1	RAT	36	1.09648	0.981748	1.21339	1.07647	0.0754469	1.09202
155	56.46	59.48	49.47	34.14	25.14	sp|Q9Z1M9|SMC1A_RAT	Structural maintenance of chromosomes protein 1A OS=Rattus norvegicus GN=Smc1a PE=1 SV=1	RAT	32	0.92045	0.895365	0.887156	0.870964	0.0200046	0.893483
156	56.41	56.73	42.53	35.24	31.64	tr|A0A0G2K9I6|A0A0G2K9I6_RAT	Ceruloplasmin OS=Rattus norvegicus GN=Cp PE=1 SV=1	RAT	40	0.862979	0.534564	0.879023	0.549541	0.233051	0.706527
157	56.36	58.51	46.73	41.07	35.19	sp|P05708|HXK1_RAT	Hexokinase-1 OS=Rattus norvegicus GN=Hk1 PE=1 SV=4	RAT	38	0.981748	1	1	1.01859	0.0130253	1.00008
158	55.68	64.27	32.06	22.53	16.73	tr|D4A8A0|D4A8A0_RAT	DNA fragmentation factor subunit beta OS=Rattus norvegicus GN=Cad PE=1 SV=2	RAT	36	0.990832	0.990832	1.02802	1.02802	0.0184186	1.00942
159	55.5	55.99	73.88	69.42	66.74	tr|A0A0H2UHM7|A0A0H2UHM7_RAT	Protein LOC100909441 OS=Rattus norvegicus GN=LOC100909441 PE=3 SV=1	RAT	94	0.981748	0.990832	0.895365	0.903649	0.0462495	0.942899
160	55.17	64.64	49.66	35.85	28.3	tr|D4A4Z9|D4A4Z9_RAT	Protein Ktn1 OS=Rattus norvegicus GN=Ktn1 PE=1 SV=2	RAT	39	0.963829	0.990832	0.963829	0.981748	0.0119794	0.975059
161	55.08	61.33	55.84	46.81	36.67	tr|Q5U302|Q5U302_RAT	Catenin (Cadherin associated protein), alpha 1 OS=Rattus norvegicus GN=Ctnna1 PE=1 SV=1	RAT	38	0.981748	0.954993	1.00925	0.981748	0.0195378	0.981935
162	55	56.73	35.63	28.18	24.02	tr|G3V699|G3V699_RAT	Protein transport protein Sec31A OS=Rattus norvegicus GN=Sec31a PE=1 SV=1	RAT	34	1.09648	1.09648	0.946237	0.946237	0.0735497	1.02136
163	54.54	56.49	54.36	46.85	40.11	sp|O35142|COPB2_RAT	Coatomer subunit beta' OS=Rattus norvegicus GN=Copb2 PE=1 SV=3	RAT	40	0.903649	1.00925	0.912011	1.01859	0.0553982	0.960876
164	54.26	54.39	64.12	54.81	48.7	tr|Q5M9H2|Q5M9H2_RAT	Acyl-Coenzyme A dehydrogenase, very long chain OS=Rattus norvegicus GN=Acadvl PE=1 SV=1	RAT	34	0.972747	1.07647	0.862979	0.963829	0.0779647	0.969005
165	54.24	55.55	53.43	47.92	40.27	tr|A0A0G2K8P3|A0A0G2K8P3_RAT	E3 ubiquitin-protein ligase NEDD4 OS=Rattus norvegicus GN=Nedd4 PE=1 SV=1	RAT	35	0.954993	0.928966	0.895365	0.870964	0.0350642	0.912572
166	54.19	55.98	50.05	40.05	30.43	tr|G3V888|G3V888_RAT	ATP-citrate synthase OS=Rattus norvegicus GN=Acly PE=1 SV=1	RAT	31	1.64437	1.77011	1.2942	1.40605	0.12312	1.52868
167	54.17	54.63	39.59	29.69	24.41	tr|A0A0G2JWB6|A0A0G2JWB6_RAT	Protein Pxdn OS=Rattus norvegicus GN=Pxdn PE=1 SV=1	RAT	31	1.25893	1.44544	1.64437	1.88799	0.149887	1.55918
168	54.1	58.16	36.49	26.21	18.24	tr|G3V6C9|G3V6C9_RAT	Non-specific serine/threonine protein kinase OS=Rattus norvegicus GN=Cdc42bpa PE=1 SV=1	RAT	36	1.01859	0.990832	1.02802	0.990832	0.016458	1.00707
169	54.08	54.51	84.27	79.55	75.96	sp|P50399|GDIB_RAT	Rab GDP dissociation inhibitor beta OS=Rattus norvegicus GN=Gdi2 PE=1 SV=2	RAT	48	1.1695	1.2942	1.10662	1.22462	0.0576782	1.19873
170	53.64	55.35	71.95	63.86	57.26	tr|Q6P7A7|Q6P7A7_RAT	Dolichyl-diphosphooligosaccharide--protein glycosyltransferase subunit 1 OS=Rattus norvegicus GN=Rpn1 PE=1 SV=1	RAT	40	0.963829	0.981748	0.963829	0.972747	0.0076511	0.970538
171	53.48	55.79	56.58	41.6	35.99	tr|Q5U328|Q5U328_RAT	Nucleolin OS=Rattus norvegicus GN=Ncl PE=1 SV=1	RAT	38	1.10662	0.990832	0.972747	0.870964	0.0848853	0.985292
172	53.35	56.89	39.01	31.47	22.07	sp|P55161|NCKP1_RAT	Nck-associated protein 1 OS=Rattus norvegicus GN=Nckap1 PE=2 SV=1	RAT	32	0.895365	1.02802	0.801678	0.92045	0.0884237	0.911377
173	53.32	55.73	35.92	23.51	19.49	tr|A0A0G2K2P5|A0A0G2K2P5_RAT	Protein Tjp1 OS=Rattus norvegicus GN=Tjp1 PE=1 SV=1	RAT	30	1.23595	1.00925	1.11686	0.92045	0.110307	1.07063
174	53.13	53.64	73.46	71.4	62.99	tr|G3V7J0|G3V7J0_RAT	Aldehyde dehydrogenase family 6, subfamily A1, isoform CRA_b OS=Rattus norvegicus GN=Aldh6a1 PE=1 SV=1	RAT	59	1.10662	1.13763	0.855067	0.879023	0.128989	0.994585
175	53.08	58.65	84.82	76.96	66.12	sp|P47853|PGS1_RAT	Biglycan OS=Rattus norvegicus GN=Bgn PE=2 SV=1	RAT	104	0.672977	1.19124	0.660693	1.1695	0.278171	0.923603
176	52.84	57.97	74.13	65.21	62.24	sp|P47942|DPYL2_RAT	Dihydropyrimidinase-related protein 2 OS=Rattus norvegicus GN=Dpysl2 PE=1 SV=1	RAT	49	0.928966	0.903649	0.765597	0.744732	0.0974021	0.835736
177	52.65	58.92	44.78	35.57	24.88	tr|D4A8C5|D4A8C5_RAT	Phosphoinositide phospholipase C OS=Rattus norvegicus GN=Plcb4 PE=1 SV=2	RAT	32	0.751623	0.809096	1.0666	1.13763	0.174332	0.941236
178	52.49	58.18	32.08	20.76	14.33	tr|A0A0G2K3H2|A0A0G2K3H2_RAT	Protein Dock7 OS=Rattus norvegicus GN=Dock7 PE=1 SV=1	RAT	35	0.912011	0.855067	1.10662	1.02802	0.100561	0.975429
179	52.39	54.86	55.67	43.64	35.4	sp|Q9QZA2|PDC6I_RAT	Programmed cell death 6-interacting protein OS=Rattus norvegicus GN=Pdcd6ip PE=1 SV=2	RAT	31	1.1272	1.2942	0.928966	1.05682	0.119684	1.10179
180	52.33	109.27	97.88	93.65	83.86	tr|A0A0G2K3K2|A0A0G2K3K2_RAT	Actin, cytoplasmic 1 OS=Rattus norvegicus GN=Actb PE=3 SV=1	RAT	420	1.20226	0.963829	1.0666	0.847227	0.128203	1.01998
181	52.26	53.61	26.88	18.94	11.65	tr|G3V824|G3V824_RAT	Insulin-like growth factor 2 receptor, isoform CRA_b OS=Rattus norvegicus GN=Igf2r PE=1 SV=1	RAT	29	1.08643	1.22462	1.23595	1.36773	0.0810213	1.22868
182	51.85	59.72	43.43	30.72	20.31	sp|Q1JU68|EIF3A_RAT	Eukaryotic translation initiation factor 3 subunit A OS=Rattus norvegicus GN=Eif3a PE=2 SV=2	RAT	34	0.903649	0.870964	0.954993	0.92045	0.0332053	0.912514
183	51.78	54.74	74.96	68.38	61.16	sp|P50137|TKT_RAT	Transketolase OS=Rattus norvegicus GN=Tkt PE=1 SV=1	RAT	43	1.70608	1.25893	1.22462	0.895365	0.226863	1.27125
184	51.55	51.89	76.29	67.1	60.66	tr|D4AC23|D4AC23_RAT	Protein Cct7 OS=Rattus norvegicus GN=Cct7 PE=1 SV=1	RAT	36	1.14815	1.09648	0.990832	0.946237	0.0770871	1.04543
185	51.23	58.68	32.92	24.93	19.34	tr|D3ZQ57|D3ZQ57_RAT	Plexin B2 OS=Rattus norvegicus GN=Plxnb2 PE=1 SV=1	RAT	36	0.954993	0.954993	0.963829	0.963829	0.00460514	0.959411
186	51.2	51.93	73.98	71.83	60.86	tr|Q5M7T5|Q5M7T5_RAT	Protein Serpinc1 OS=Rattus norvegicus GN=Serpinc1 PE=1 SV=1	RAT	51	1.72187	1.95884	0.954993	1.09648	0.29227	1.43305
187	51.15	53.63	45.44	36.5	30.42	tr|A0A0G2JVZ6|A0A0G2JVZ6_RAT	Protein Itgav OS=Rattus norvegicus GN=Itgav PE=1 SV=1	RAT	36	0.903649	1	0.816582	0.903649	0.0716242	0.90597
188	50.97	51.5	91.29	90.09	84.38	sp|P04797|G3P_RAT	Glyceraldehyde-3-phosphate dehydrogenase OS=Rattus norvegicus GN=Gapdh PE=1 SV=3	RAT	78	1.85353	2.91072	0.570164	0.963829	0.572024	1.57456
189	50.69	54.77	49.38	34.2	23.66	tr|A0A0G2JYT1|A0A0G2JYT1_RAT	ELKS/Rab6-interacting/CAST family member 1 OS=Rattus norvegicus GN=Erc1 PE=1 SV=1	RAT	33	0.870964	1.35519	0.83946	1.30617	0.218332	1.09295
190	50.69	54.11	58.32	49.77	44.48	tr|G3V6T7|G3V6T7_RAT	Protein disulfide-isomerase A4 OS=Rattus norvegicus GN=Pdia4 PE=1 SV=1	RAT	38	0.912011	1.1272	0.787046	0.963829	0.128786	0.947521
191	50.49	57.07	91.91	87.28	76.3	sp|P07150|ANXA1_RAT	Annexin A1 OS=Rattus norvegicus GN=Anxa1 PE=1 SV=2	RAT	47	1.19124	0.801678	1.09648	0.724436	0.204777	0.953459
192	50.15	55.23	79.34	71.68	56.12	tr|G3V8L9|G3V8L9_RAT	Polymerase I and transcript release factor OS=Rattus norvegicus GN=Ptrf PE=1 SV=1	RAT	71	0.47863	0.691831	0.369828	0.496592	0.227901	0.50922
193	50	55.12	49	40.58	34.87	tr|Q6P136|Q6P136_RAT	Hyou1 protein OS=Rattus norvegicus GN=Hyou1 PE=1 SV=1	RAT	36	0.744732	1.05682	0.772681	1.09648	0.174237	0.917677
194	49.98	55.47	45.52	35.57	28.67	tr|Q7TP05|Q7TP05_RAT	Da1-24 OS=Rattus norvegicus GN=Cfb PE=1 SV=1	RAT	37					#DIV/0!	#DIV/0!
195	49.66	61.59	66.56	59.25	53.9	tr|D3ZLC1|D3ZLC1_RAT	Protein Lmnb2 OS=Rattus norvegicus GN=Lmnb2 PE=1 SV=2	RAT	41	0.963829	0.954993	0.824138	0.809096	0.0807001	0.888014
196	49.66	51.97	39.39	33.07	22.89	tr|G3V8T4|G3V8T4_RAT	DNA damage-binding protein 1 OS=Rattus norvegicus GN=Ddb1 PE=1 SV=1	RAT	26	1.03753	0.946237	1.01859	0.928966	0.0469337	0.982831
197	49.45	49.79	60.15	53.07	45.02	tr|D3ZMX6|D3ZMX6_RAT	Protein Sntb2 OS=Rattus norvegicus GN=Sntb2 PE=1 SV=3	RAT	32	0.816582	0.787046	0.724436	0.685488	0.0682482	0.753388
198	49.31	51.92	47.14	40.31	36.89	sp|Q4FZT9|PSMD2_RAT	26S proteasome non-ATPase regulatory subunit 2 OS=Rattus norvegicus GN=Psmd2 PE=1 SV=1	RAT	39	1.08643	0.972747	1.08643	0.981748	0.0529946	1.03184
199	49.21	59.55	71.4	64.21	55.58	sp|P28480|TCPA_RAT	T-complex protein 1 subunit alpha OS=Rattus norvegicus GN=Tcp1 PE=1 SV=1	RAT	42	0.937562	0.855067	0.824138	0.751623	0.0791943	0.842097
200	49.17	51.14	66.77	61.87	50.32	sp|Q5XI07|LPP_RAT	Lipoma-preferred partner homolog OS=Rattus norvegicus GN=Lpp PE=1 SV=1	RAT	60	1.00925	0.954993	0.597035	0.564937	0.258207	0.781554
201	49.13	51.06	65.88	46.89	41.51	tr|A0A0G2K0D3|A0A0G2K0D3_RAT	Protein Lmod1 OS=Rattus norvegicus GN=Lmod1 PE=1 SV=1	RAT	40	0.704693	0.711214	0.698232	0.711214	0.00762235	0.706338
202	49.01	51.05	45.49	36.84	27.44	tr|Q6IMY8|Q6IMY8_RAT	Heterogeneous nuclear ribonucleoprotein U OS=Rattus norvegicus GN=Hnrnpu PE=1 SV=1	RAT	33	0.831764	0.751623	0.831764	0.751623	0.0506136	0.791693
203	48.88	53.16	46.3	34.57	28.04	tr|F1M9V7|F1M9V7_RAT	Protein Npepps OS=Rattus norvegicus GN=Npepps PE=1 SV=1	RAT	29	1.2942	1.33045	1.02802	1.04713	0.11757	1.17495
204	48.72	61.54	30.36	20.37	11.12	tr|F1LRI5|F1LRI5_RAT	Protein Gcn1l1 OS=Rattus norvegicus GN=Gcn1l1 PE=1 SV=3	RAT	39	0.794328	1	0.831764	1.03753	0.114152	0.915905
205	48.7	53.41	50.05	40.88	34.54	tr|D3ZUL3|D3ZUL3_RAT	Protein Col6a1 OS=Rattus norvegicus GN=Col6a1 PE=1 SV=1	RAT	39	0.824138	0.963829	0.737904	0.862979	0.0957618	0.847212
206	48.61	59.39	42.1	34.69	26.56	sp|Q63356|MYO1E_RAT	Unconventional myosin-Ie OS=Rattus norvegicus GN=Myo1e PE=1 SV=1	RAT	36	0.937562	0.981748	0.879023	0.912011	0.04046	0.927586
207	48.54	49.3	45.1	37.25	28.94	sp|Q80U96|XPO1_RAT	Exportin-1 OS=Rattus norvegicus GN=Xpo1 PE=1 SV=1	RAT	30	0.990832	1.10662	0.928966	1.03753	0.0639477	1.01599
208	48.37	52.38	38.5	27.86	24.57	tr|M0R671|M0R671_RAT	Protein Tns2 OS=Rattus norvegicus GN=Tns2 PE=1 SV=1	RAT	32	0.972747	0.954993	0.824138	0.809096	0.0832185	0.890243
209	48.35	48.98	31.93	19.13	14.09	tr|D3ZL10|D3ZL10_RAT	Protein Col6a6 OS=Rattus norvegicus GN=Col6a6 PE=1 SV=3	RAT	28	1.1695	1	0.963829	0.816582	0.127144	0.987478
210	48.33	51.28	39.01	32.88	28.88	tr|D4A9D6|D4A9D6_RAT	DEAH (Asp-Glu-Ala-His) box polypeptide 9 (Predicted) OS=Rattus norvegicus GN=Dhx9 PE=1 SV=1	RAT	31	1.01859	1	0.963829	0.937562	0.0320732	0.979996
211	48.32	52.85	37.26	25.6	19.95	tr|A0A0G2K6R8|A0A0G2K6R8_RAT	Protein Ehbp1l1 OS=Rattus norvegicus GN=Ehbp1l1 PE=1 SV=1	RAT	29	0.879023	1.00925	1.00925	1.1695	0.101276	1.01676
212	48.26	58.02	52.14	44.84	33.99	sp|P41542|USO1_RAT	General vesicular transport factor p115 OS=Rattus norvegicus GN=Uso1 PE=1 SV=1	RAT	38	0.972747	0.981748	0.990832	1	0.0102973	0.986332
213	48.15	50.64	64.43	55.54	52.04	tr|F1LS40|F1LS40_RAT	Collagen alpha-2(I) chain OS=Rattus norvegicus GN=Col1a2 PE=1 SV=3	RAT	85	1.08643	0.83946	1.28233	0.990832	0.152959	1.04976
214	47.55	53.42	74.52	64.05	55.85	sp|P63039|CH60_RAT	60 kDa heat shock protein, mitochondrial OS=Rattus norvegicus GN=Hspd1 PE=1 SV=1	RAT	49	0.724436	1.45881	0.49204	1	0.391697	0.918822
215	47.52	48.42	61.03	51.72	41.9	tr|F7F389|F7F389_RAT	Complement component C9 OS=Rattus norvegicus GN=C9 PE=1 SV=1	RAT	33	0.432514	0.483059	0.597035	0.672977	0.17258	0.546396
216	47.45	47.94	63.54	54.33	40.15	tr|R9PXW7|R9PXW7_RAT	Stress-induced phosphoprotein 1, isoform CRA_a OS=Rattus norvegicus GN=Stip1 PE=1 SV=2	RAT	29	0.928966	0.946237	0.831764	0.847227	0.0559712	0.888549
217	47.24	54.65	26.66	15.74	9.481	sp|Q63638|SPEG_RAT	Striated muscle-specific serine/threonine-protein kinase OS=Rattus norvegicus GN=Speg PE=1 SV=2	RAT	31	1	0.981748	0.990832	0.972747	0.0102973	0.986332
218	47.23	49.48	51.44	44.22	38.44	tr|D3Z9E1|D3Z9E1_RAT	Elastin microfibril interfacer 1 (Predicted), isoform CRA_b OS=Rattus norvegicus GN=Emilin1 PE=1 SV=1	RAT	29	1	1.03753	1.13763	1.1695	0.0640891	1.08616
219	47.09	53.01	44.91	35.69	28.72	tr|Q5EBC0|Q5EBC0_RAT	Inter alpha-trypsin inhibitor, heavy chain 4 OS=Rattus norvegicus GN=Itih4 PE=1 SV=1	RAT	32	0.539511	0.369828	0.597035	0.413047	0.191733	0.479855
220	47.08	48.88	54.75	48.01	41.54	sp|Q66HF1|NDUS1_RAT	NADH-ubiquinone oxidoreductase 75 kDa subunit, mitochondrial OS=Rattus norvegicus GN=Ndufs1 PE=1 SV=1	RAT	27	0.887156	1.18032	0.912011	1.20226	0.139965	1.04544
221	47.04	53.24	57.16	43.78	39.46	sp|Q641Y8|DDX1_RAT	ATP-dependent RNA helicase DDX1 OS=Rattus norvegicus GN=Ddx1 PE=1 SV=1	RAT	33	0.870964	0.765597	0.972747	0.855067	0.0848853	0.866094
222	46.81	51.62	60.81	49.67	42.6	sp|Q64428|ECHA_RAT	Trifunctional enzyme subunit alpha, mitochondrial OS=Rattus norvegicus GN=Hadha PE=1 SV=2	RAT	35	0.981748	1.1272	0.642688	0.737904	0.220295	0.872384
223	46.66	46.72	73.21	63.93	61.54	sp|Q9EQP5|PRELP_RAT	Prolargin OS=Rattus norvegicus GN=Prelp PE=2 SV=1	RAT	73	0.895365	0.724436	0.765597	0.613762	0.134348	0.74979
224	46.5	47.94	45.05	40.71	36.91	tr|A0A096MKE0|A0A096MKE0_RAT	Protein Asph OS=Rattus norvegicus GN=Asph PE=1 SV=1	RAT	28	0.954993	1.20226	0.954993	1.20226	0.114623	1.07863
225	46.45	49.51	89.38	82.6	73.45	sp|Q07936|ANXA2_RAT	Annexin A2 OS=Rattus norvegicus GN=Anxa2 PE=1 SV=2	RAT	60	1.58489	1.21339	1.20226	0.937562	0.186672	1.23453
226	46.41	52.61	38.99	30.43	21.63	tr|F1LS86|F1LS86_RAT	Isoleucine-tRNA synthetase (Predicted) OS=Rattus norvegicus GN=Iars PE=1 SV=2	RAT	29	0.937562	1.23595	0.895365	1.1695	0.13761	1.05959
227	46.06	48.95	49.16	37.12	31.95	tr|G3V6S2|G3V6S2_RAT	Aconitate hydratase OS=Rattus norvegicus GN=Aco1 PE=1 SV=1	RAT	28	1.01859	1.13763	0.937562	1.04713	0.0690562	1.03523
228	46.02	48.47	47.49	37.34	29.82	tr|A0A0G2JSK5|A0A0G2JSK5_RAT	Integrin beta 1 (Fibronectin receptor beta) OS=Rattus norvegicus GN=Itgb1 PE=1 SV=1	RAT	39	0.92045	0.954993	0.816582	0.847227	0.0625779	0.884813
229	45.95	55.96	26.91	16.82	9.963	tr|E9PTY6|E9PTY6_RAT	Protein Fry OS=Rattus norvegicus GN=Fry PE=1 SV=3	RAT	29	1.00925	1.03753	1.05682	1.08643	0.0268505	1.04751
230	45.89	47.13	42.16	33.3	28.92	tr|F1LNH3|F1LNH3_RAT	Procollagen, type VI, alpha 2, isoform CRA_a OS=Rattus norvegicus GN=Col6a2 PE=1 SV=2	RAT	44	0.963829	0.855067	0.809096	0.717794	0.105924	0.836446
231	45.74	49.09	47.23	35.25	30.59	tr|G3V918|G3V918_RAT	Phosphoribosylglycinamide formyltransferase, isoform CRA_a OS=Rattus norvegicus GN=Gart PE=1 SV=1	RAT	29	1.00925	1.00925	1.00925	1	0.00397901	1.00694
232	45.72	48.63	36.88	31.15	26.91	tr|A0A0G2JV12|A0A0G2JV12_RAT	Procollagen, type XV, isoform CRA_a OS=Rattus norvegicus GN=LOC100909752 PE=4 SV=1	RAT	83	1.39316	1.88799	1.38038	1.83654	0.146803	1.62452
233	45.52	45.94	79.2	74.78	63.5	sp|Q99J82|ILK_RAT	Integrin-linked protein kinase OS=Rattus norvegicus GN=Ilk PE=2 SV=1	RAT	52	0.903649	1.04713	0.679204	0.758578	0.166139	0.84714
234	45.48	47.49	76.26	66.67	62.59	sp|P16617|PGK1_RAT	Phosphoglycerate kinase 1 OS=Rattus norvegicus GN=Pgk1 PE=1 SV=2	RAT	50	1.27057	1.23595	1.24738	1.23595	0.0113321	1.24746
235	45.21	46.48	94.2	89.86	89.86	tr|A0A0G2JWK7|A0A0G2JWK7_RAT	Transgelin OS=Rattus norvegicus GN=Tagln PE=1 SV=1	RAT	95	1.69044	2.58226	0.737904	1.13763	0.450059	1.53706
236	45.12	46.79	51.97	43.55	34.06	sp|P14882|PCCA_RAT	Propionyl-CoA carboxylase alpha chain, mitochondrial OS=Rattus norvegicus GN=Pcca PE=1 SV=3	RAT	28	0.937562	0.912011	0.879023	0.855067	0.0350641	0.895916
237	45.01	48.97	67.38	58.69	45.57	sp|Q9QZR6|SEPT9_RAT	Septin-9 OS=Rattus norvegicus GN=Sept9 PE=1 SV=1	RAT	29	1	0.981748	0.972747	0.954993	0.0166038	0.977372
238	44.8	50.47	72.35	62.61	58.63	sp|P56574|IDHP_RAT	Isocitrate dehydrogenase [NADP], mitochondrial OS=Rattus norvegicus GN=Idh2 PE=1 SV=2	RAT	41	0.903649	0.990832	0.758578	0.83946	0.0975883	0.87313
239	44.76	48.99	55.51	44.81	35.68	sp|P23514|COPB_RAT	Coatomer subunit beta OS=Rattus norvegicus GN=Copb1 PE=1 SV=1	RAT	34	0.981748	1.02802	0.972747	1.01859	0.0234781	1.00028
240	44.7	45.58	71.48	60.61	46.01	tr|Q5XI34|Q5XI34_RAT	Protein Ppp2r1a OS=Rattus norvegicus GN=Ppp2r1a PE=1 SV=1	RAT	30	0.625173	0.77983	0.824138	1.02802	0.176612	0.814289
241	44.67	49.8	70.33	65.13	60.12	sp|P11884|ALDH2_RAT	Aldehyde dehydrogenase, mitochondrial OS=Rattus norvegicus GN=Aldh2 PE=1 SV=1	RAT	71	1.1272	1.36773	0.954993	1.14815	0.127524	1.14952
242	44.63	46.56	59.74	51.72	46.81	tr|Q499P2|Q499P2_RAT	Leukotriene A(4) hydrolase OS=Rattus norvegicus GN=Lta4h PE=1 SV=1	RAT	32	1.02802	1.0666	0.937562	0.972747	0.0495755	1.00123
243	44.47	44.63	53.76	47.52	42.27	tr|D3ZQ25|D3ZQ25_RAT	Fibulin-1 OS=Rattus norvegicus GN=Fbln1 PE=1 SV=1	RAT	46	1.55597	1.57036	1.0666	1.07647	0.186659	1.31735
244	44.34	44.65	45.11	34.32	28.18	tr|F1LRP7|F1LRP7_RAT	Protein argonaute-2 OS=Rattus norvegicus GN=Ago2 PE=1 SV=2	RAT	25	0.990832	1.03753	0.937562	0.981748	0.0359651	0.986918
245	44.05	45.87	19.17	13.12	8.926	tr|F1M957|F1M957_RAT	von Willebrand factor OS=Rattus norvegicus GN=Vwf PE=1 SV=3	RAT	25	1.30617	0.855067	1.35519	0.887156	0.209571	1.1009
246	44.03	47.81	22.3	13.64	10.39	sp|D4ACX8|PCD16_RAT	Protocadherin-16 OS=Rattus norvegicus GN=Dchs1 PE=3 SV=2	RAT	30	0.862979	1.21339	1.03753	1.45881	0.192759	1.14318
247	44	45.3	43.98	34.28	29.61	sp|Q4V8C3|EMAL1_RAT	Echinoderm microtubule-associated protein-like 1 OS=Rattus norvegicus GN=Eml1 PE=1 SV=2	RAT	30	0.855067	0.928966	0.801678	0.870964	0.0524984	0.864169
248	43.94	45.76	96.63	83.5	69.36	sp|Q08290|CNN1_RAT	Calponin-1 OS=Rattus norvegicus GN=Cnn1 PE=1 SV=1	RAT	71	0.440555	1.40605	0.285759	0.937562	0.57376	0.767481
249	43.84	44.57	69.6	65.91	61.65	tr|F1LNF1|F1LNF1_RAT	Heterogeneous nuclear ribonucleoproteins A2/B1 OS=Rattus norvegicus GN=Hnrnpa2b1 PE=1 SV=1	RAT	40	0.847227	0.758578	0.737904	0.666807	0.0855076	0.752629
250	43.83	49.92	32.67	26.57	21.86	sp|P28494|MA2A1_RAT	Alpha-mannosidase 2 OS=Rattus norvegicus GN=Man2a1 PE=1 SV=2	RAT	26	0.660693	0.83946	0.698232	0.887156	0.12237	0.771385
251	43.83	46.17	44.91	39.18	30.76	tr|D3ZDF3|D3ZDF3_RAT	MRV integration site 1 homolog (Mouse) (Predicted), isoform CRA_b OS=Rattus norvegicus GN=Mrvi1 PE=1 SV=1	RAT	26	0.990832	0.963829	1	0.963829	0.016458	0.979623
252	43.77	45.27	34.02	27.28	22.93	tr|E9PT66|E9PT66_RAT	Protein Sf3b3 OS=Rattus norvegicus GN=Sf3b3 PE=1 SV=2	RAT	26	0.946237	0.972747	0.92045	0.946237	0.0195378	0.946418
253	43.46	55.13	48.72	41.96	34.38	sp|Q66HA8|HS105_RAT	Heat shock protein 105 kDa OS=Rattus norvegicus GN=Hsph1 PE=1 SV=1	RAT	36	0.903649	1.15878	0.879023	1.11686	0.122647	1.01458
254	43.42	47.07	49.12	39.01	33.14	tr|A0A0G2KBC7|A0A0G2KBC7_RAT	ATP-dependent 6-phosphofructokinase OS=Rattus norvegicus GN=Pfkm PE=1 SV=1	RAT	30	1.0666	1.23595	1.00925	1.1695	0.0785924	1.12032
255	43.21	44.3	43.32	36.2	32.05	tr|A0A0G2K261|A0A0G2K261_RAT	Protein Iars2 OS=Rattus norvegicus GN=Iars2 PE=1 SV=1	RAT	27	0.92045	0.862979	0.862979	0.816582	0.0425376	0.865747
256	43.16	44.99	78.57	75.12	65.67	tr|M0R5J4|M0R5J4_RAT	Uncharacterized protein OS=Rattus norvegicus PE=3 SV=1	RAT	51	1.40605	2.10863	0.928966	1.40605	0.287787	1.46242
257	43.11	44.01	58.96	54.48	46.42	sp|Q6P6V0|G6PI_RAT	Glucose-6-phosphate isomerase OS=Rattus norvegicus GN=Gpi PE=1 SV=1	RAT	41	1.13763	1.0666	0.972747	0.928966	0.079083	1.02648
258	43.08	43.71	95.87	82.11	77.06	tr|B6DYQ2|B6DYQ2_RAT	Glutathione S-transferase mu 2 OS=Rattus norvegicus GN=Gstm2 PE=1 SV=1	RAT	58	0.57544	0.654636	0.394457	0.465586	0.191129	0.52253
259	43.06	45.18	45.69	38.92	33.87	sp|Q01177|PLMN_RAT	Plasminogen OS=Rattus norvegicus GN=Plg PE=2 SV=2	RAT	32	0.831764	0.483059	1.09648	0.636796	0.300847	0.762024
260	43.03	47.33	53	47.49	43.11	tr|G3V843|G3V843_RAT	Prothrombin OS=Rattus norvegicus GN=F2 PE=1 SV=1	RAT	28	0.672977	0.591562	0.77983	0.685488	0.097863	0.682464
261	43.01	70.14	63.9	51.31	43.71	tr|G3V8V3|G3V8V3_RAT	Alpha-1,4 glucan phosphorylase OS=Rattus norvegicus GN=Pygm PE=1 SV=1	RAT	54	0.648634	0.92045	0.887156	1.28233	0.2423	0.934643
262	42.87	43.25	40.19	29.81	28.08	tr|G3V758|G3V758_RAT	Contactin 2 OS=Rattus norvegicus GN=Cntn2 PE=4 SV=1	RAT	24	1.51356	1.58489	1.75388	1.8197	0.0741239	1.66801
263	42.75	42.94	61.85	54.31	51.72	tr|Q5D059|Q5D059_RAT	Hnrpk protein OS=Rattus norvegicus GN=Hnrnpk PE=1 SV=1	RAT	34	1	0.946237	0.954993	0.903649	0.0359652	0.95122
264	42.24	43.13	47.48	39.59	30.66	sp|Q4AEF8|COPG1_RAT	Coatomer subunit gamma-1 OS=Rattus norvegicus GN=Copg1 PE=2 SV=1	RAT	25	0.83946	1.13763	0.744732	1.00925	0.162484	0.932768
265	42.18	45.42	34.69	26.04	19.45	tr|A0A0G2K6E8|A0A0G2K6E8_RAT	Protein Spag9 OS=Rattus norvegicus GN=Spag9 PE=1 SV=1	RAT	27	1.03753	1.01859	1	0.981748	0.0205937	1.00947
266	42.12	42.26	73.28	65.34	56.58	sp|P14480|FIBB_RAT	Fibrinogen beta chain OS=Rattus norvegicus GN=Fgb PE=1 SV=4	RAT	26	0.554626	0.432514	0.831764	0.648634	0.236376	0.616884
267	42.07	48.45	66.39	61.49	53.72	sp|O35567|PUR9_RAT	Bifunctional purine biosynthesis protein PURH OS=Rattus norvegicus GN=Atic PE=1 SV=2	RAT	37	0.963829	0.963829	0.981748	0.990832	0.0119794	0.975059
268	41.97	43.29	47.92	43.76	37.72	sp|Q6P0K8|PLAK_RAT	Junction plakoglobin OS=Rattus norvegicus GN=Jup PE=1 SV=1	RAT	23	0.981748	0.972747	1	0.990832	0.0102973	0.986332
269	41.84	79.94	73.81	66.85	54.98	sp|P82995|HS90A_RAT	Heat shock protein HSP 90-alpha OS=Rattus norvegicus GN=Hsp90aa1 PE=1 SV=3	RAT	79	1.19124	1.25893	1	1.05682	0.0915747	1.12675
270	41.84	43.14	53.14	44.5	34.08	tr|D3ZJ32|D3ZJ32_RAT	Protein Esyt2 OS=Rattus norvegicus GN=Esyt2 PE=1 SV=3	RAT	32	1.02802	0.831764	0.946237	0.758578	0.11617	0.891149
271	41.61	44.88	47.43	38.72	28.75	tr|G3V8B6|G3V8B6_RAT	26S proteasome non-ATPase regulatory subunit 1 OS=Rattus norvegicus GN=Psmd1 PE=1 SV=1	RAT	31	0.990832	0.963829	0.990832	0.972747	0.0119488	0.97956
272	41.55	43.75	48.95	47.05	41.98	tr|G3V624|G3V624_RAT	Coronin OS=Rattus norvegicus GN=Coro1c PE=1 SV=1	RAT	42	0.772681	0.928966	0.619441	0.724436	0.146438	0.761381
273	41.51	44.33	79.94	72.41	63.95	sp|P14668|ANXA5_RAT	Annexin A5 OS=Rattus norvegicus GN=Anxa5 PE=1 SV=3	RAT	62	0.981748	1.09648	1	1.11686	0.0559712	1.04877
274	41.46	46.68	43.75	25.7	15.09	tr|F1MAH8|F1MAH8_RAT	Protein Clip1 OS=Rattus norvegicus GN=Clip1 PE=1 SV=3	RAT	24	0.972747	0.946237	1.03753	1.00925	0.0350642	0.991441
275	41.11	43.17	37.4	28.25	24.39	tr|D4AB03|D4AB03_RAT	Protein Fam120a OS=Rattus norvegicus GN=Fam120a PE=1 SV=2	RAT	24	0.954993	0.954993	0.990832	0.990832	0.0184186	0.972912
276	41.11	41.79	63.11	54.17	45.05	sp|P05370|G6PD_RAT	Glucose-6-phosphate 1-dehydrogenase OS=Rattus norvegicus GN=G6pdx PE=1 SV=3	RAT	26	1.41906	1.5417	1.31826	1.41906	0.0555892	1.42452
277	40.95	41.11	28.94	19.61	16.39	tr|D3ZZB0|D3ZZB0_RAT	Protein Dip2c OS=Rattus norvegicus GN=Dip2c PE=1 SV=2	RAT	23	0.903649	0.963829	0.954993	1.02802	0.0459142	0.962622
278	40.9	44.31	51.52	42.12	34.39	sp|P40329|SYRC_RAT	Arginine--tRNA ligase, cytoplasmic OS=Rattus norvegicus GN=Rars PE=1 SV=2	RAT	22	1.10662	1.1272	1.00925	1.01859	0.0489106	1.06542
279	40.9	41.54	75.78	66.43	61.63	tr|Q5RJR9|Q5RJR9_RAT	Serine (Or cysteine) proteinase inhibitor, clade H, member 1, isoform CRA_b OS=Rattus norvegicus GN=Serpinh1 PE=1 SV=1	RAT	46	0.711214	1.09648	0.758578	1.1695	0.215657	0.933942
280	40.82	41.96	49.59	43.56	40.27	tr|D3ZTT7|D3ZTT7_RAT	Protein Sun2 OS=Rattus norvegicus GN=Sun2 PE=1 SV=1	RAT	34	1.1272	0.870964	1.11686	0.855067	0.130658	0.992523
281	40.69	43.27	46.36	35.43	30.03	tr|A0A0H2UH90|A0A0H2UH90_RAT	von Willebrand factor A domain-containing protein 5A OS=Rattus norvegicus GN=Vwa5a PE=1 SV=1	RAT	27	0.981748	0.981748	1.03753	1.03753	0.027624	1.00964
282	40.54	44.55	43.75	31.56	24.69	sp|Q2TA68|OPA1_RAT	Dynamin-like 120 kDa protein, mitochondrial OS=Rattus norvegicus GN=Opa1 PE=1 SV=1	RAT	31	0.963829	0.937562	0.928966	0.903649	0.0230251	0.933502
283	40.49	40.8	84.81	75.11	55.27	sp|Q08163|CAP1_RAT	Adenylyl cyclase-associated protein 1 OS=Rattus norvegicus GN=Cap1 PE=1 SV=3	RAT	53	1.07647	1.08643	1.05682	1.0666	0.0102973	1.07158
284	40.48	42.74	54.98	47.1	35.22	sp|P09215|KPCD_RAT	Protein kinase C delta type OS=Rattus norvegicus GN=Prkcd PE=1 SV=1	RAT	24	0.816582	0.990832	0.758578	0.912011	0.102275	0.869501
285	40.39	41.39	55.44	48.64	41.24	tr|A0A0G2K719|A0A0G2K719_RAT	Protein Ddx3x OS=Rattus norvegicus GN=Ddx3x PE=1 SV=1	RAT	27	1.01859	1.00925	1	0.990832	0.0102973	1.00467
286	40.37	46	27.04	15.19	8.355	tr|M0R3M4|M0R3M4_RAT	Protein Ranbp2 OS=Rattus norvegicus GN=Ranbp2 PE=1 SV=1	RAT	28	1	0.946237	1.02802	0.972747	0.0308881	0.98675
287	40.32	40.43	27.75	20.79	15.95	tr|D3ZAA3|D3ZAA3_RAT	Latent transforming growth factor beta binding protein 1 OS=Rattus norvegicus GN=Ltbp1 PE=1 SV=2	RAT	25	0.737904	0.794328	1.1695	1.28233	0.235123	0.996016
288	40.3	41.2	37.08	29.77	23.31	tr|A0A0G2JTI8|A0A0G2JTI8_RAT	Glutamyl aminopeptidase OS=Rattus norvegicus GN=Enpep PE=1 SV=1	RAT	25	0.937562	0.912011	0.704693	0.685488	0.142483	0.809939
289	40.26	41.43	48.12	36.69	29.44	tr|A0A0G2K6U1|A0A0G2K6U1_RAT	Vesicle-fusing ATPase OS=Rattus norvegicus GN=Nsf PE=1 SV=1	RAT	23	1.14815	0.946237	1.10662	0.912011	0.0981679	1.02826
290	40.18	41.89	93.26	82.9	72.54	sp|P47875|CSRP1_RAT	Cysteine and glycine-rich protein 1 OS=Rattus norvegicus GN=Csrp1 PE=1 SV=2	RAT	76	1.09648	1.03753	0.879023	0.824138	0.11614	0.959292
291	40.11	44.98	49.74	41.3	34.78	tr|Q7TQ70|Q7TQ70_RAT	Ac1873 OS=Rattus norvegicus GN=Fga PE=1 SV=1	RAT	29	0.515229	0.376704	0.758578	0.559758	0.247501	0.552567
292	40.03	53.65	35.38	17.35	9.758	tr|A0A0G2JWG6|A0A0G2JWG6_RAT	Protein Golgb1 OS=Rattus norvegicus GN=Golgb1 PE=1 SV=1	RAT	37	0.731139	0.879023	1.07647	1.2942	0.212696	0.995206
293	40.03	44.73	68.09	63.83	59.75	tr|D4A7U1|D4A7U1_RAT	Protein Zyx OS=Rattus norvegicus GN=Zyx PE=1 SV=1	RAT	42	0.731139	0.744732	0.685488	0.704693	0.0320732	0.716513
294	39.81	42.22	94.55	90.91	87.27	sp|Q7M0E3|DEST_RAT	Destrin OS=Rattus norvegicus GN=Dstn PE=1 SV=3	RAT	42	1.21339	1.83654	0.731139	1.07647	0.329289	1.21438
295	39.78	43.84	91.43	86.53	80.82	sp|P63102|1433Z_RAT	14-3-3 protein zeta/delta OS=Rattus norvegicus GN=Ywhaz PE=1 SV=1	RAT	40	0.879023	1.11686	0.654636	0.831764	0.1895	0.870571
296	39.69	45.97	35.91	27.67	21.68	tr|A0A0G2K5D7|A0A0G2K5D7_RAT	Protein Specc1 OS=Rattus norvegicus GN=Specc1 PE=1 SV=1	RAT	28	0.744732	0.981748	0.765597	1.00925	0.137989	0.875332
297	39.64	44.49	78.59	75.49	62.82	tr|Q45QN0|Q45QN0_RAT	Guanine nucleotide binding protein alpha inhibiting 2 OS=Rattus norvegicus GN=Gnai2 PE=1 SV=1	RAT	41	1	1	0.981748	0.972747	0.0119488	0.988624
298	39.61	41.95	50.46	43.53	38.95	tr|B5DFC3|B5DFC3_RAT	Protein Sec23a OS=Rattus norvegicus GN=Sec23a PE=1 SV=1	RAT	31	0.765597	0.903649	0.855067	1.01859	0.103084	0.885726
299	39.59	40.04	51.7	43.11	39.06	tr|D4A133|D4A133_RAT	Protein Atp6v1a OS=Rattus norvegicus GN=Atp6v1a PE=1 SV=1	RAT	25	1.08643	1.22462	0.981748	1.09648	0.0785008	1.09732
300	39.41	40.62	51.38	40.08	29.27	tr|G3V8A5|G3V8A5_RAT	Protein Vps35 OS=Rattus norvegicus GN=Vps35 PE=1 SV=1	RAT	31	0.751623	0.870964	0.731139	0.83946	0.0732127	0.798296
301	39.25	43.83	33.64	23.73	18.98	sp|P18614|ITA1_RAT	Integrin alpha-1 OS=Rattus norvegicus GN=Itga1 PE=1 SV=1	RAT	26	0.879023	0.666807	0.794328	0.608135	0.143886	0.737073
302	39.18	39.46	55.7	50.72	39.81	tr|F1LQ48|F1LQ48_RAT	Protein Fblim1 OS=Rattus norvegicus GN=Hnrnpl PE=1 SV=2	RAT	30	0.963829	0.963829	0.879023	0.879023	0.0460192	0.921426
303	39.15	40.83	53.86	46.76	38.58	sp|Q9EPF2|MUC18_RAT	Cell surface glycoprotein MUC18 OS=Rattus norvegicus GN=Mcam PE=1 SV=2	RAT	26	1.30617	1.04713	1.21339	0.981748	0.113505	1.13711
304	39.11	39.34	47.68	36.51	28.36	tr|D3ZAN3|D3ZAN3_RAT	Alpha glucosidase 2 alpha neutral subunit (Predicted) OS=Rattus norvegicus GN=Ganab PE=1 SV=1	RAT	28	0.946237	0.981748	0.946237	0.972747	0.016458	0.961742
305	39.08	41.28	58.29	48.47	40.18	tr|A0A0G2K4R1|A0A0G2K4R1_RAT	Protein Ppp1r12c OS=Rattus norvegicus GN=Ppp1r12c PE=1 SV=1	RAT	26	0.625173	0.972747	0.636796	0.990832	0.217721	0.806387
306	39.06	43.45	34.46	26.7	16.52	tr|A0A0G2JTL5|A0A0G2JTL5_RAT	Pyruvate carboxylase, mitochondrial OS=Rattus norvegicus GN=Pc PE=1 SV=1	RAT	22	1.72187	1.72187	1.52757	1.51356	0.0621596	1.62122
307	39.04	56.75	33.18	19.11	10.68	sp|F1MA98|TPR_RAT	Nucleoprotein TPR OS=Rattus norvegicus GN=Tpr PE=1 SV=1	RAT	31	1.19124	0.928966	1.23595	0.972747	0.123097	1.08223
308	39.03	42.26	71.59	65.82	58.43	tr|G3V7L6|G3V7L6_RAT	26S protease regulatory subunit 7 OS=Rattus norvegicus GN=Psmc2 PE=1 SV=1	RAT	27	1.04713	1.11686	0.903649	0.963829	0.0803345	1.00787
309	38.93	42.99	52.63	41.55	34.21	tr|A0A0G2K9V6|A0A0G2K9V6_RAT	Threonine--tRNA ligase, cytoplasmic OS=Rattus norvegicus GN=Tars PE=1 SV=1	RAT	26	0.92045	1.14815	0.855067	1.05682	0.115034	0.995122
310	38.86	43.74	85.71	78.07	72.09	sp|P20070|NB5R3_RAT	NADH-cytochrome b5 reductase 3 OS=Rattus norvegicus GN=Cyb5r3 PE=1 SV=2	RAT	51	1.01859	1.14815	1.11686	1.25893	0.0755041	1.13563
311	38.78	40.36	35.78	24.38	16.65	tr|F1LRQ1|F1LRQ1_RAT	Aldehyde oxidase 1 OS=Rattus norvegicus GN=Aox1 PE=1 SV=3	RAT	27	1.28233	1.11686	1.18032	1.02802	0.0805021	1.15188
312	38.75	43.77	54.64	48.39	38.39	sp|P37285|KLC1_RAT	Kinesin light chain 1 OS=Rattus norvegicus GN=Klc1 PE=1 SV=2	RAT	28	1.03753	1.04713	0.946237	0.954993	0.0462495	0.996472
313	38.62	41.98	36.61	25.59	20.24	tr|Q5RKI5|Q5RKI5_RAT	Flightless I homolog (Drosophila) OS=Rattus norvegicus GN=Flii PE=1 SV=1	RAT	25	0.855067	1.48594	0.765597	1.31826	0.274284	1.10621
314	38.49	41.56	48.32	37.35	28.81	sp|Q9Z2J4|NEXN_RAT	Nexilin OS=Rattus norvegicus GN=Nexn PE=1 SV=1	RAT	24	0.831764	0.751623	0.77983	0.704693	0.0600237	0.766977
315	38.49	40.01	23.64	17.66	12.5	tr|A0A0G2JXT9|A0A0G2JXT9_RAT	Protein Arhgef17 OS=Rattus norvegicus GN=Arhgef17 PE=1 SV=1	RAT	25	1.01859	0.972747	1.03753	0.990832	0.0247966	1.00492
316	38.48	39.12	37.99	31.66	26.02	tr|D4ABA9|D4ABA9_RAT	Protein Xirp1 OS=Rattus norvegicus GN=Xirp1 PE=1 SV=2	RAT	25	0.855067	0.972747	1.01859	1.15878	0.108599	1.0013
317	38.44	45.66	36.58	25.46	19.4	tr|G3V7T6|G3V7T6_RAT	Protein Sf3b1 OS=Rattus norvegicus GN=Sf3b1 PE=1 SV=1	RAT	25	1.08643	1.00925	1.07647	1	0.0371119	1.04304
318	38.34	39.44	47.55	37.73	30.72	tr|F1LPH1|F1LPH1_RAT	Calpastatin OS=Rattus norvegicus GN=Cast PE=1 SV=1	RAT	23	1.05682	0.903649	0.912011	0.77983	0.107455	0.913077
319	38.26	39.28	76.18	67.69	60.14	sp|P17764|THIL_RAT	Acetyl-CoA acetyltransferase, mitochondrial OS=Rattus norvegicus GN=Acat1 PE=1 SV=1	RAT	30	0.855067	1.04713	0.724436	0.895365	0.130717	0.880499
320	38.24	42.05	61.1	53.76	43.49	sp|Q6P502|TCPG_RAT	T-complex protein 1 subunit gamma OS=Rattus norvegicus GN=Cct3 PE=1 SV=1	RAT	27	0.862979	0.879023	0.772681	0.77983	0.0580091	0.823628
321	38.2	42.87	39.65	31.25	24.32	tr|A0A0G2JUW8|A0A0G2JUW8_RAT	Protein LOC100912445 OS=Rattus norvegicus GN=Lnpep PE=1 SV=1	RAT	28	0.972747	1.01859	0.954993	1.00925	0.0263038	0.988896
322	38.2	40.59	40.68	31.41	24.41	tr|D3ZPR0|D3ZPR0_RAT	Chromosome segregation 1-like (S. cerevisiae) (Predicted) OS=Rattus norvegicus GN=Cse1l PE=1 SV=1	RAT	27	0.794328	0.809096	0.758578	0.77983	0.0237473	0.785458
323	38.15	46.36	42.97	33.33	27.81	tr|D3ZM69|D3ZM69_RAT	Protein Epb41l2 OS=Rattus norvegicus GN=Epb41l2 PE=1 SV=2	RAT	25	0.981748	0.972747	0.963829	0.946237	0.0135817	0.96614
324	38.11	45.05	47.55	38.01	32.54	sp|P97571|CAN1_RAT	Calpain-1 catalytic subunit OS=Rattus norvegicus GN=Capn1 PE=1 SV=1	RAT	29	1.02802	1.1272	0.928966	1.01859	0.0684465	1.02569
325	38.08	38.34	63.35	54.45	51.42	tr|Q499Q4|Q499Q4_RAT	Phosphoglucomutase 1 OS=Rattus norvegicus GN=Pgm1 PE=1 SV=2	RAT	27	0.963829	1.00925	0.887156	0.937562	0.0465248	0.94945
326	38.04	39.11	32.04	22.24	14.64	tr|D4AD15|D4AD15_RAT	Protein Eif4g1 OS=Rattus norvegicus GN=Eif4g1 PE=1 SV=2	RAT	25	0.887156	1.00925	1.07647	1.22462	0.116096	1.04937
327	38.04	38.44	62.5	56.53	54.29	tr|A0A0G2JSS9|A0A0G2JSS9_RAT	Atlastin-3 OS=Rattus norvegicus GN=Atl3 PE=1 SV=1	RAT	39	1.27057	1.10662	1.14815	1.00925	0.0827061	1.13365
328	37.93	39.3	68.27	56.67	48.8	sp|Q9Z1Z9|PDLI7_RAT	PDZ and LIM domain protein 7 OS=Rattus norvegicus GN=Pdlim7 PE=1 SV=1	RAT	39	0.648634	0.744732	0.625173	0.711214	0.0700093	0.682438
329	37.82	39.67	72.82	67.45	63.09	sp|Q09073|ADT2_RAT	ADP/ATP translocase 2 OS=Rattus norvegicus GN=Slc25a5 PE=1 SV=3	RAT	30	1.09648	1.18032	0.946237	1.00925	0.0836175	1.05807
330	37.52	38.95	43.22	37.8	31.57	sp|Q66HF9|LRRF1_RAT	Leucine-rich repeat flightless-interacting protein 1 OS=Rattus norvegicus GN=Lrrfip1 PE=1 SV=1	RAT	26	1.20226	1.18032	1.01859	1	0.0832184	1.10029
331	37.49	38.38	54.56	36.64	30.97	sp|Q9EPH8|PABP1_RAT	Polyadenylate-binding protein 1 OS=Rattus norvegicus GN=Pabpc1 PE=1 SV=1	RAT	21	1.0666	1.11686	1.13763	1.20226	0.0430277	1.13084
332	37.3	37.79	42.33	34.99	25.05	sp|A2VCW9|AASS_RAT	Alpha-aminoadipic semialdehyde synthase, mitochondrial OS=Rattus norvegicus GN=Aass PE=2 SV=1	RAT	25	0.862979	1.0666	0.731139	0.903649	0.134356	0.891091
333	37.23	37.69	65.58	55.58	49.77	sp|P00507|AATM_RAT	Aspartate aminotransferase, mitochondrial OS=Rattus norvegicus GN=Got2 PE=1 SV=2	RAT	30	1.20226	1.27057	0.972747	1.00925	0.112891	1.11371
334	37.16	38.92	65.13	52.63	45.39	tr|Q5XIC6|Q5XIC6_RAT	Proteasome (Prosome, macropain) 26S subunit, non-ATPase, 12 OS=Rattus norvegicus GN=Psmd12 PE=1 SV=1	RAT	26	1.08643	1.04713	0.972747	0.937562	0.0582063	1.01097
335	37.15	37.34	64.6	50	49.12	tr|Q6IE50|Q6IE50_RAT	Protein Smoc1 OS=Rattus norvegicus GN=Smoc1 PE=1 SV=1	RAT	23	1.11686	0.862979	1.24738	0.954993	0.141341	1.04555
336	37.04	41.66	66.17	55.51	48.79	sp|Q5XIM9|TCPB_RAT	T-complex protein 1 subunit beta OS=Rattus norvegicus GN=Cct2 PE=1 SV=3	RAT	27	1.05682	1.01859	1.1272	1.08643	0.0371221	1.07226
337	36.93	37.57	45.16	32.96	29.56	sp|P54319|PLAP_RAT	Phospholipase A-2-activating protein OS=Rattus norvegicus GN=Plaa PE=1 SV=3	RAT	22	1.14815	1.13763	1.13763	1.14815	0.00460517	1.14289
338	36.89	37.67	57.14	49.43	37.57	sp|Q07009|CAN2_RAT	Calpain-2 catalytic subunit OS=Rattus norvegicus GN=Capn2 PE=1 SV=3	RAT	32	0.887156	1.05682	0.809096	0.963829	0.0987468	0.929225
339	36.75	40.31	86.05	86.05	83.72	tr|B0BMS8|B0BMS8_RAT	Myl9 protein OS=Rattus norvegicus GN=Myl9 PE=1 SV=1	RAT	77	1.43219	1.77011	1.1695	1.44544	0.146436	1.45431
340	36.73	37.08	54.65	42.69	38.21	tr|Q66HK3|Q66HK3_RAT	Prostaglandin G/H synthase 1 OS=Rattus norvegicus GN=Ptgs1 PE=1 SV=1	RAT	26	1.39316	1.25893	1.92309	1.7378	0.167818	1.57824
341	36.64	39.43	67.65	55.64	41.77	sp|Q68FQ0|TCPE_RAT	T-complex protein 1 subunit epsilon OS=Rattus norvegicus GN=Cct5 PE=1 SV=1	RAT	25	0.981748	0.990832	0.946237	0.954993	0.0189858	0.968452
342	36.62	70.92	54.12	49.02	39.61	sp|P06686|AT1A2_RAT	Sodium/potassium-transporting ATPase subunit alpha-2 OS=Rattus norvegicus GN=Atp1a2 PE=1 SV=1	RAT	50	0.77983	0.862979	0.679204	0.744732	0.0864697	0.766686
343	36.62	38.06	56.84	53.37	43.93	sp|Q68FS4|AMPL_RAT	Cytosol aminopeptidase OS=Rattus norvegicus GN=Lap3 PE=1 SV=1	RAT	26	1.0666	1.13763	1.07647	1.13763	0.0300856	1.10458
344	36.53	40.83	71.1	60.32	51.61	tr|F1LMC7|F1LMC7_RAT	Septin-7 OS=Rattus norvegicus GN=Sept7 PE=1 SV=3	RAT	35	1.03753	0.731139	1.10662	0.77983	0.176292	0.91378
345	36.46	41.82	40.46	27.59	19.92	tr|A0A0G2K5A4|A0A0G2K5A4_RAT	Uncharacterized protein OS=Rattus norvegicus PE=4 SV=1	RAT	29	0.879023	1	2.55859	2.96483	0.498939	1.85061
346	36.4	41.55	46.42	39.27	31.24	tr|D4A8G5|D4A8G5_RAT	Protein Tgfbi OS=Rattus norvegicus GN=Tgfbi PE=1 SV=2	RAT	25	0.963829	0.816582	1.04713	0.887156	0.0925607	0.928674
347	36.38	41.02	47.81	39.07	29.4	sp|O35303|DNM1L_RAT	Dynamin-1-like protein OS=Rattus norvegicus GN=Dnm1l PE=1 SV=1	RAT	23	1.0666	1.10662	1.13763	1.19124	0.04046	1.12552
348	36.17	40.49	77.71	67.17	63.25	tr|B5DEN4|B5DEN4_RAT	L-lactate dehydrogenase OS=Rattus norvegicus GN=Ldha PE=1 SV=1	RAT	33	1.20226	1.1695	0.870964	0.83946	0.16277	1.02055
349	36.07	38.71	47.37	41.22	36.02	sp|P13941|CO3A1_RAT	Collagen alpha-1(III) chain OS=Rattus norvegicus GN=Col3a1 PE=2 SV=3	RAT	75	0.981748	0.912011	1	0.928966	0.0379605	0.955681
350	35.95	38.85	38.43	29.44	20.97	sp|P50475|SYAC_RAT	Alanine--tRNA ligase, cytoplasmic OS=Rattus norvegicus GN=Aars PE=1 SV=3	RAT	23	0.824138	1.07647	0.83946	1.08643	0.130658	0.956622
351	35.86	60.8	49.03	40.74	35.93	tr|D3ZUY8|D3ZUY8_RAT	Adaptor protein complex AP-2, alpha 1 subunit (Predicted) OS=Rattus norvegicus GN=Ap2a1 PE=1 SV=1	RAT	42	0.831764	1.01859	0.731139	0.887156	0.119684	0.867163
352	35.79	37.09	56.07	43.55	37.01	sp|Q6IRI9|FMO2_RAT	Dimethylaniline monooxygenase [N-oxide-forming] 2 OS=Rattus norvegicus GN=Fmo2 PE=2 SV=3	RAT	28	1.22462	0.212814	1.69044	0.293765	0.730519	0.855409
353	35.77	45.44	66.49	62.11	58.42	sp|Q62952|DPYL3_RAT	Dihydropyrimidinase-related protein 3 OS=Rattus norvegicus GN=Dpysl3 PE=1 SV=2	RAT	48	0.954993	0.981748	0.946237	0.963829	0.0136623	0.961702
354	35.71	37.75	61.8	54.83	48.99	tr|A0A0G2JSZ5|A0A0G2JSZ5_RAT	Protein disulfide-isomerase A6 OS=Rattus norvegicus GN=Pdia6 PE=1 SV=1	RAT	33	0.642688	0.751623	0.672977	0.787046	0.0814695	0.713583
355	35.62	44.8	56.38	46.77	43.99	tr|Q8R3Z7|Q8R3Z7_RAT	EH-domain containing 4 OS=Rattus norvegicus GN=Ehd4 PE=1 SV=1	RAT	27	0.972747	1.14815	0.691831	0.816582	0.188454	0.907329
356	35.62	35.87	67.92	55.97	54.2	sp|P32551|QCR2_RAT	Cytochrome b-c1 complex subunit 2, mitochondrial OS=Rattus norvegicus GN=Uqcrc2 PE=1 SV=2	RAT	28	0.847227	0.972747	0.83946	0.963829	0.0691222	0.905816
357	35.45	37.08	60	53.85	49.23	sp|B2GV06|SCOT1_RAT	Succinyl-CoA:3-ketoacid coenzyme A transferase 1, mitochondrial OS=Rattus norvegicus GN=Oxct1 PE=1 SV=1	RAT	29	0.831764	0.903649	0.824138	0.895365	0.0416785	0.863729
358	35.42	36.66	67.26	59.85	55.75	sp|P02651|APOA4_RAT	Apolipoprotein A-IV OS=Rattus norvegicus GN=Apoa4 PE=1 SV=2	RAT	24	0.903649	1.02802	0.816582	0.928966	0.0819607	0.919304
359	35.38	38.65	32.24	17.97	11.43	tr|D3ZZW1|D3ZZW1_RAT	Protein Dock1 OS=Rattus norvegicus GN=Dock1 PE=1 SV=1	RAT	22	0.990832	0.954993	1.02802	0.981748	0.0264407	0.988897
360	35.38	35.93	61.34	56.8	52.74	sp|Q2LAP6|TES_RAT	Testin OS=Rattus norvegicus GN=Tes PE=1 SV=1	RAT	37	0.954993	0.870964	0.855067	0.77983	0.071916	0.865213
361	35.38	35.61	75.69	68.31	64	sp|P51635|AK1A1_RAT	Alcohol dehydrogenase [NADP(+)] OS=Rattus norvegicus GN=Akr1a1 PE=1 SV=2	RAT	26	0.928966	0.963829	0.903649	0.937562	0.0230251	0.933502
362	35.33	35.78	32.52	25.34	19.95	tr|F1LY19|F1LY19_RAT	Protein Upf1 OS=Rattus norvegicus GN=Upf1 PE=1 SV=3	RAT	22	0.847227	1.25893	0.77983	1.15878	0.199979	1.01119
363	35.33	35.65	42.11	32.97	26.66	tr|F1LRY5|F1LRY5_RAT	RCG45398 OS=Rattus norvegicus GN=Sardh PE=1 SV=2	RAT	19	0.787046	1.02802	0.831764	1.07647	0.132824	0.930823
364	35.31	37.56	63.41	55.03	43.45	sp|Q920L2|SDHA_RAT	Succinate dehydrogenase [ubiquinone] flavoprotein subunit, mitochondrial OS=Rattus norvegicus GN=Sdha PE=1 SV=1	RAT	30	1	1.01859	0.946237	0.954993	0.0308449	0.979955
365	35.26	36.35	85.47	83.39	74.74	tr|D3ZXK9|D3ZXK9_RAT	Purine nucleoside phosphorylase OS=Rattus norvegicus GN=Pnp PE=1 SV=3	RAT	42	1.09648	1.97697	1.13763	2.0893	0.292039	1.57509
366	35.2	36.34	45.22	28.54	21.75	tr|A0A0A0MY49|A0A0A0MY49_RAT	Dynamin-2 OS=Rattus norvegicus GN=Dnm2 PE=1 SV=2	RAT	19	1.08643	0.92045	1.20226	1.01859	0.0970524	1.05693
367	35.15	40.99	61.41	51.52	40.3	tr|G3V9Z3|G3V9Z3_RAT	Amine oxidase [flavin-containing] OS=Rattus norvegicus GN=Maoa PE=1 SV=1	RAT	27	1.21339	1.03753	1.11686	0.963829	0.0856582	1.0829
368	35.13	35.17	92.72	88.35	84.95	tr|G3V913|G3V913_RAT	Heat shock 27kDa protein 1 OS=Rattus norvegicus GN=Hspb1 PE=1 SV=1	RAT	52	1.33045	1.27057	0.946237	0.903649	0.170369	1.11273
369	35.11	37.94	53.37	40.78	32.09	tr|A0A0H2UHG0|A0A0H2UHG0_RAT	Tyrosine--tRNA ligase OS=Rattus norvegicus GN=Yars PE=1 SV=1	RAT	22	1.03753	1.02802	0.990832	0.981748	0.0234781	1.00953
370	35.1	37.65	50.59	42.13	31.13	sp|P35565|CALX_RAT	Calnexin OS=Rattus norvegicus GN=Canx PE=1 SV=1	RAT	30	0.937562	1.02802	0.83946	0.928966	0.0714883	0.933501
371	34.99	41.73	36.64	27.53	17.25	tr|F1LMT8|F1LMT8_RAT	Rab3 GTPase-activating protein non-catalytic subunit OS=Rattus norvegicus GN=Rab3gap2 PE=1 SV=3	RAT	27	1.1272	1.02802	1.39316	1.28233	0.11617	1.20768
372	34.94	35.94	74.62	67.8	55.3	sp|P49242|RS3A_RAT	40S ribosomal protein S3a OS=Rattus norvegicus GN=Rps3a PE=1 SV=2	RAT	21	1.15878	1.33045	0.887156	1.02802	0.148567	1.1011
373	34.92	39.66	49.05	39.84	29.95	sp|O55096|DPP3_RAT	Dipeptidyl peptidase 3 OS=Rattus norvegicus GN=Dpp3 PE=1 SV=2	RAT	24	1.11686	1.21339	0.946237	1.03753	0.0913653	1.0785
374	34.88	38.24	72.3	59.1	50.4	tr|A0A0G2JXA8|A0A0G2JXA8_RAT	Flotillin 2, isoform CRA_d OS=Rattus norvegicus GN=Flot2 PE=1 SV=1	RAT	22	0.862979	0.809096	0.879023	0.824138	0.0335167	0.843809
375	34.84	46.92	21.96	12.43	6.45	tr|A0A0G2JVW5|A0A0G2JVW5_RAT	E3 ubiquitin-protein ligase HUWE1 OS=Rattus norvegicus GN=Huwe1 PE=1 SV=1	RAT	29	1.2942	1.20226	1.04713	0.963829	0.114529	1.12685
376	34.83	35.08	67.86	59.45	49.58	tr|Q68FY4|Q68FY4_RAT	Group specific component OS=Rattus norvegicus GN=Gc PE=1 SV=1	RAT	23	0.787046	0.765597	0.895365	0.879023	0.0676279	0.831757
377	34.82	34.9	56.25	51.44	46.96	sp|Q9ESS6|BCAM_RAT	Basal cell adhesion molecule OS=Rattus norvegicus GN=Bcam PE=2 SV=1	RAT	27	0.903649	0.954993	0.855067	0.903649	0.0390737	0.90434
378	34.81	34.86	70.81	69.46	69.13	sp|Q5I0D1|GLOD4_RAT	Glyoxalase domain-containing protein 4 OS=Rattus norvegicus GN=Glod4 PE=1 SV=1	RAT	19	0.990832	1.01859	0.903649	0.937562	0.0465551	0.962659
379	34.78	35.86	68.49	62.47	53.15	tr|Q6AYF2|Q6AYF2_RAT	LIM and cysteine-rich domains 1 OS=Rattus norvegicus GN=Lmcd1 PE=1 SV=1	RAT	29	0.870964	1.07647	0.870964	1.07647	0.105525	0.973714
380	34.77	39.52	40.27	31.47	28.25	tr|Q3B7D6|Q3B7D6_RAT	RCG39552, isoform CRA_a OS=Rattus norvegicus GN=Spon1 PE=1 SV=1	RAT	27	1.30617	1.04713	1.24738	1	0.112486	1.15017
381	34.72	38.16	57.63	51.04	41.62	tr|Q3MHS9|Q3MHS9_RAT	Chaperonin containing Tcp1, subunit 6A (Zeta 1) OS=Rattus norvegicus GN=Cct6a PE=1 SV=1	RAT	30	1.09648	1.03753	0.879023	0.831764	0.11353	0.961198
382	34.68	35.31	44.64	37.18	33.77	tr|Q66HF3|Q66HF3_RAT	Electron transfer flavoprotein-ubiquinone oxidoreductase, mitochondrial OS=Rattus norvegicus GN=Etfdh PE=1 SV=1	RAT	21	0.972747	1.03753	0.862979	0.928966	0.0669346	0.950555
383	34.61	37.93	47.1	36.81	22.96	tr|D3ZQR7|D3ZQR7_RAT	Procollagen-lysine,2-oxoglutarate 5-dioxygenase 2 OS=Rattus norvegicus GN=Plod2 PE=1 SV=1	RAT	18	1.10662	0.954993	1.23595	1.0666	0.0920529	1.09104
384	34.56	35.4	69.3	65.82	56.65	sp|P07943|ALDR_RAT	Aldose reductase OS=Rattus norvegicus GN=Akr1b1 PE=1 SV=3	RAT	33	0.619441	1.08643	0.636796	1.10662	0.271816	0.862322
385	34.55	36.07	32.24	24.71	19.4	tr|D3ZN51|D3ZN51_RAT	Protein Itga9 OS=Rattus norvegicus GN=Itga9 PE=1 SV=3	RAT	24	0.586138	0.672977	0.496592	0.570164	0.107838	0.581468
386	34.46	34.59	43.61	37.31	29.98	sp|Q9ES21|SAC1_RAT	Phosphatidylinositide phosphatase SAC1 OS=Rattus norvegicus GN=Sacm1l PE=1 SV=1	RAT	25	1.01859	0.990832	1.01859	0.990832	0.0138146	1.00471
387	34.33	39.37	42.28	35.03	26.84	tr|B5DEG1|B5DEG1_RAT	Protein Itga8 OS=Rattus norvegicus GN=Itga8 PE=2 SV=1	RAT	34	0.847227	0.794328	0.870964	0.824138	0.0339723	0.834164
388	34.22	38.14	48.43	40.3	30.89	sp|Q62667|MVP_RAT	Major vault protein OS=Rattus norvegicus GN=Mvp PE=1 SV=4	RAT	22	0.731139	0.855067	0.704693	0.824138	0.080283	0.778759
389	34.2	36.65	34.59	28.55	24.15	tr|D3ZD97|D3ZD97_RAT	DEAH (Asp-Glu-Ala-His) box polypeptide 15 (Predicted), isoform CRA_b OS=Rattus norvegicus GN=Dhx15 PE=1 SV=1	RAT	20	0.912011	0.772681	0.870964	0.744732	0.0832299	0.825097
390	34.18	34.25	73.08	64.9	56.73	sp|P18418|CALR_RAT	Calreticulin OS=Rattus norvegicus GN=Calr PE=1 SV=1	RAT	28	0.855067	1.20226	0.559758	0.765597	0.274408	0.845671
391	34.15	46.54	49.23	42.31	31.28	sp|P30835|PFKAL_RAT	ATP-dependent 6-phosphofructokinase, liver type OS=Rattus norvegicus GN=Pfkl PE=1 SV=3	RAT	25	1.1695	1.04713	1.11686	1	0.0598273	1.08337
392	34.08	34.15	69.3	67.41	62.97	tr|A0A0G2JSM3|A0A0G2JSM3_RAT	PDZ and LIM domain 3, isoform CRA_a OS=Rattus norvegicus GN=Pdlim3 PE=1 SV=1	RAT	23	0.731139	0.862979	0.648634	0.772681	0.102429	0.753858
393	34.06	34.27	81.07	75.31	72.02	sp|P62909|RS3_RAT	40S ribosomal protein S3 OS=Rattus norvegicus GN=Rps3 PE=1 SV=1	RAT	22	1.1272	1.14815	0.903649	0.912011	0.112636	1.02275
394	34.04	35.76	35.17	25.99	18.45	tr|A0A0G2K6D5|A0A0G2K6D5_RAT	Protein Pitrm1 OS=Rattus norvegicus GN=Pitrm1 PE=1 SV=1	RAT	18	0.937562	0.831764	1.05682	0.946237	0.0844417	0.943095
395	34	36.35	56.01	46.14	40.77	tr|G3V936|G3V936_RAT	Citrate synthase OS=Rattus norvegicus GN=Cs PE=1 SV=1	RAT	29	0.895365	1.31826	0.765597	1.11686	0.206308	1.02402
396	33.99	35.11	30.2	26.17	21.07	tr|D4ABT8|D4ABT8_RAT	Protein Hnrnpul2 OS=Rattus norvegicus GN=Hnrnpul2 PE=1 SV=1	RAT	20	1.01859	0.855067	0.912011	0.765597	0.103382	0.887816
397	33.96	34.67	54.01	42.27	34.83	sp|Q66H80|COPD_RAT	Coatomer subunit delta OS=Rattus norvegicus GN=Arcn1 PE=2 SV=1	RAT	21	0.895365	1.02802	0.887156	1.01859	0.0691222	0.957282
398	33.85	39.18	39.89	31.61	22.47	tr|Q4KMA8|Q4KMA8_RAT	Endoplasmic reticulum aminopeptidase 1 OS=Rattus norvegicus GN=Erap1 PE=1 SV=1	RAT	22	1.04713	1.22462	0.887156	1.05682	0.113267	1.05393
399	33.76	34.3	40.85	30.58	22.68	sp|P18395|CSDE1_RAT	Cold shock domain-containing protein E1 OS=Rattus norvegicus GN=Csde1 PE=2 SV=1	RAT	20	1.61436	1.67494	1.05682	1.0666	0.215994	1.35318
400	33.72	34.51	85.98	78.05	73.78	sp|P10111|PPIA_RAT	Peptidyl-prolyl cis-trans isomerase A OS=Rattus norvegicus GN=Ppia PE=1 SV=2	RAT	49	0.816582	1.38038	0.625173	1.01859	0.291255	0.960183
401	33.65	34.31	29.08	23.79	17.96	sp|Q05030|PGFRB_RAT	Platelet-derived growth factor receptor beta OS=Rattus norvegicus GN=Pdgfrb PE=2 SV=2	RAT	18	0.847227	1.02802	0.724436	0.879023	0.124319	0.869676
402	33.61	37.92	44.62	33.85	30.92	tr|E9PT29|E9PT29_RAT	Protein Ddx17 OS=Rattus norvegicus GN=Ddx17 PE=1 SV=3	RAT	22	1.01859	0.831764	1.08643	0.879023	0.107763	0.953951
403	33.56	34.69	72.88	60.77	48.91	sp|P05544|SPA3L_RAT	Serine protease inhibitor A3L OS=Rattus norvegicus GN=Serpina3l PE=1 SV=3	RAT	25	0.751623	1.01859	0.862979	1.1695	0.166159	0.950673
404	33.52	34.22	28.52	16.63	9.54	tr|A0A0G2K2J3|A0A0G2K2J3_RAT	Phosphatidylinositol 4-kinase alpha OS=Rattus norvegicus GN=Pi4ka PE=1 SV=1	RAT	21	1.45881	1.24738	1.10662	0.928966	0.163661	1.18545
405	33.46	34.57	41.72	32.92	22.99	sp|Q5M7W5|MAP4_RAT	Microtubule-associated protein 4 OS=Rattus norvegicus GN=Map4 PE=1 SV=1	RAT	22	0.928966	0.981748	0.879023	0.928966	0.0390737	0.929676
406	33.43	37.61	39.61	29.55	22.62	tr|A0A0G2JX93|A0A0G2JX93_RAT	Signal transducer and activator of transcription OS=Rattus norvegicus GN=Stat1 PE=1 SV=1	RAT	26	0.672977	0.672977	0.83946	0.83946	0.110076	0.756218
407	33.43	33.86	73.96	70.41	60.95	sp|P04636|MDHM_RAT	Malate dehydrogenase, mitochondrial OS=Rattus norvegicus GN=Mdh2 PE=1 SV=2	RAT	33	1.09648	1.22462	0.990832	1.10662	0.0749482	1.10464
408	33.38	35.98	74.39	59.76	49.76	sp|P63004|LIS1_RAT	Platelet-activating factor acetylhydrolase IB subunit alpha OS=Rattus norvegicus GN=Pafah1b1 PE=1 SV=2	RAT	21	1.00925	1.0666	0.912011	0.963829	0.0576782	0.987922
409	33.36	33.9	24.01	16.07	10.82	tr|F1LPF2|F1LPF2_RAT	Agrin OS=Rattus norvegicus GN=Agrn PE=1 SV=3	RAT	19	0.862979	0.660693	0.928966	0.711214	0.137861	0.790963
410	33.32	35.19	86.12	84.86	80.44	sp|P63245|GBLP_RAT	Guanine nucleotide-binding protein subunit beta-2-like 1 OS=Rattus norvegicus GN=Gnb2l1 PE=1 SV=3	RAT	30	0.981748	1.1695	0.92045	1.09648	0.0930774	1.04204
411	33.3	35.72	60.19	40.94	33.02	tr|Q5U2S7|Q5U2S7_RAT	Proteasome (Prosome, macropain) 26S subunit, non-ATPase, 3 OS=Rattus norvegicus GN=Psmd3 PE=1 SV=1	RAT	24	1.00925	1.00925	0.981748	0.990832	0.0119488	0.997771
412	33.25	34.55	58.15	53.52	51.11	tr|A0A0G2JSI1|A0A0G2JSI1_RAT	4-trimethylaminobutyraldehyde dehydrogenase OS=Rattus norvegicus GN=Aldh9a1 PE=1 SV=1	RAT	41	1.01859	1.02802	1.01859	1.02802	0.00460514	1.0233
413	33.21	33.39	50.69	43.21	33.44	tr|F1LX07|F1LX07_RAT	Protein Slc25a12 OS=Rattus norvegicus GN=Slc25a12 PE=1 SV=3	RAT	21	1.1272	1.01859	0.963829	0.870964	0.0931741	0.995145
414	33.2	39.03	49.81	36.9	30.32	tr|Q66H61|Q66H61_RAT	Glutaminyl-tRNA synthetase OS=Rattus norvegicus GN=Qars PE=1 SV=1	RAT	25	1.08643	1.11686	1.0666	1.08643	0.0164992	1.08908
415	33.19	37.08	39.05	31.08	23.01	tr|B2RYM3|B2RYM3_RAT	Inter-alpha trypsin inhibitor, heavy chain 1 (Predicted), isoform CRA_a OS=Rattus norvegicus GN=Itih1 PE=1 SV=1	RAT	27	0.666807	0.580764	0.704693	0.613762	0.0743188	0.641507
416	33.18	33.86	43.74	37.69	29.44	sp|P35571|GPDM_RAT	Glycerol-3-phosphate dehydrogenase, mitochondrial OS=Rattus norvegicus GN=Gpd2 PE=1 SV=1	RAT	20	0.946237	0.990832	0.981748	1.02802	0.0294861	0.986708
417	33.15	33.69	24.75	19.73	17.63	tr|B5DEG8|B5DEG8_RAT	LOC685144 protein OS=Rattus norvegicus GN=Sec24c PE=1 SV=1	RAT	19	1	0.981748	0.972747	0.954993	0.0166038	0.977372
418	33.14	36.12	44.73	38.5	32.75	tr|D4A772|D4A772_RAT	Dystrobrevin OS=Rattus norvegicus GN=Dtna PE=1 SV=3	RAT	24	0.946237	0.704693	0.847227	0.642688	0.151454	0.785211
419	33.13	52.3	31.41	21.02	14.94	sp|Q7TT49|MRCKB_RAT	Serine/threonine-protein kinase MRCK beta OS=Rattus norvegicus GN=Cdc42bpb PE=1 SV=1	RAT	33	0.972747	0.954993	1.00925	0.990832	0.0205937	0.981956
420	33.1	33.72	49.14	43.53	35.26	tr|F1LQJ7|F1LQJ7_RAT	Protein Pck2 OS=Rattus norvegicus GN=Pck2 PE=1 SV=2	RAT	25	0.981748	1.1272	0.903649	1.03753	0.0805021	1.01253
421	33.07	33.59	90.2	80.74	61.82	tr|Q6P792|Q6P792_RAT	Four and a half LIM domains 1 OS=Rattus norvegicus GN=Fhl1 PE=1 SV=1	RAT	45	1.77011	1.45881	1.36773	1.1695	0.150275	1.44154
422	32.97	34.94	71	60.56	51.97	tr|F1LPV8|F1LPV8_RAT	Succinyl-CoA ligase subunit beta OS=Rattus norvegicus GN=Suclg2 PE=1 SV=2	RAT	22	1.02802	1.01859	1.05682	1.04713	0.0145621	1.03764
423	32.97	33.01	54.41	47.3	43.38	sp|Q6AYS7|ACY1A_RAT	Aminoacylase-1A OS=Rattus norvegicus GN=Acy1a PE=1 SV=1	RAT	16	0.981748	1	1	1.00925	0.0100038	0.99775
424	32.95	35.75	72.49	66.27	56.8	sp|P51886|LUM_RAT	Lumican OS=Rattus norvegicus GN=Lum PE=1 SV=1	RAT	75	1.31826	1.65959	0.717794	0.903649	0.318208	1.14982
425	32.91	38.95	38.03	26.23	18.76	tr|Q5PPJ6|Q5PPJ6_RAT	Leucyl-tRNA synthetase OS=Rattus norvegicus GN=Lars PE=1 SV=1	RAT	23	1.00925	1.00925	1.00925	1.00925	0	1.00925
426	32.9	34.94	18.04	9.806	4.707	tr|G3V9W9|G3V9W9_RAT	Protein Fat1 OS=Rattus norvegicus GN=Fat1 PE=1 SV=1	RAT	24	1.03753	1.04713	1.07647	1.08643	0.0189858	1.06189
427	32.85	33.98	45.24	33.2	28.57	tr|G3V9D1|G3V9D1_RAT	Phosphoinositide phospholipase C OS=Rattus norvegicus GN=Plcd1 PE=1 SV=1	RAT	23	1.10662	0.990832	1	0.887156	0.0779647	0.996153
428	32.82	44.23	35.38	23.26	14.42	tr|A0A0G2JYD3|A0A0G2JYD3_RAT	Protein Uggt2 OS=Rattus norvegicus GN=Uggt2 PE=1 SV=1	RAT	27	0.937562	0.972747	0.954993	0.981748	0.017642	0.961762
429	32.68	41.87	72.22	63.53	57.97	sp|P41562|IDHC_RAT	Isocitrate dehydrogenase [NADP] cytoplasmic OS=Rattus norvegicus GN=Idh1 PE=1 SV=1	RAT	34	0.787046	0.981748	0.666807	0.824138	0.138056	0.814935
430	32.68	32.89	41.78	30.1	26.15	tr|G3V9R9|G3V9R9_RAT	Afamin OS=Rattus norvegicus GN=Afm PE=1 SV=1	RAT	17	0.972747	0.654636	1.0666	0.717794	0.201019	0.852943
431	32.64	34.11	66.79	57.51	45.83	sp|Q64057|AL7A1_RAT	Alpha-aminoadipic semialdehyde dehydrogenase OS=Rattus norvegicus GN=Aldh7a1 PE=1 SV=2	RAT	22	1.0666	1.03753	1.09648	1.0666	0.0195378	1.0668
432	32.62	33.81	46.8	38.13	27.05	tr|F2Z3Q8|F2Z3Q8_RAT	Importin subunit beta-1 OS=Rattus norvegicus GN=Kpnb1 PE=1 SV=1	RAT	25	1.00925	0.990832	0.981748	0.972747	0.0136623	0.988645
433	32.58	38.64	79.61	75.29	66.67	sp|P62260|1433E_RAT	14-3-3 protein epsilon OS=Rattus norvegicus GN=Ywhae PE=1 SV=1	RAT	32	0.963829	1.0666	1.01859	1.1272	0.0576782	1.04405
434	32.49	36.5	25.56	14.49	9.661	sp|P34926|MAP1A_RAT	Microtubule-associated protein 1A OS=Rattus norvegicus GN=Map1a PE=1 SV=1	RAT	25	1.03753	0.83946	1.36773	1.09648	0.173979	1.0853
435	32.48	36.11	71.43	60.34	51.72	sp|Q68FS2|CSN4_RAT	COP9 signalosome complex subunit 4 OS=Rattus norvegicus GN=Cops4 PE=1 SV=1	RAT	19	1.10662	0.990832	1.01859	0.903649	0.0720757	1.00492
436	32.46	34.87	44.22	38.06	33.74	sp|Q6P6T4|EMAL2_RAT	Echinoderm microtubule-associated protein-like 2 OS=Rattus norvegicus GN=Eml2 PE=1 SV=1	RAT	21	0.92045	0.981748	0.772681	0.816582	0.0946888	0.872865
437	32.44	32.62	67.13	57.64	52.55	sp|P10760|SAHH_RAT	Adenosylhomocysteinase OS=Rattus norvegicus GN=Ahcy PE=1 SV=3	RAT	23	0.912011	1.08643	0.895365	1.07647	0.0898106	0.992567
438	32.42	33.6	51.54	44.49	40.53	tr|Q9JKB7|Q9JKB7_RAT	Guanine deaminase OS=Rattus norvegicus GN=Gda PE=1 SV=1	RAT	27	2.72898	2.55859	2.12814	1.99526	0.127893	2.35274
439	32.42	32.87	40.76	30.79	25.51	tr|D4A9D8|D4A9D8_RAT	Oxysterol-binding protein OS=Rattus norvegicus GN=Osbp PE=1 SV=2	RAT	21	0.879023	0.963829	0.912011	1	0.0495755	0.938716
440	32.29	36.18	41.03	29.62	21.28	sp|Q9JJ31|CUL5_RAT	Cullin-5 OS=Rattus norvegicus GN=Cul5 PE=1 SV=3	RAT	22	1	0.990832	0.972747	0.963829	0.0145621	0.981852
441	32.26	33.65	45.07	36.23	28.12	tr|Q5U330|Q5U330_RAT	Guanylate cyclase 1, soluble, alpha 3 OS=Rattus norvegicus GN=Gucy1a3 PE=1 SV=1	RAT	21	0.981748	0.981748	1.00925	1.00925	0.0138147	0.9955
442	32.16	36.42	41.54	32.55	26.69	sp|B5DF89|CUL3_RAT	Cullin-3 OS=Rattus norvegicus GN=Cul3 PE=1 SV=2	RAT	24	0.946237	0.954993	0.972747	0.981748	0.0145621	0.963931
443	32.16	33.46	34.84	26.41	19.63	sp|Q5FVQ8|NLRX1_RAT	NLR family member X1 OS=Rattus norvegicus GN=Nlrx1 PE=2 SV=1	RAT	19	0.990832	1.01859	1.00925	1.02802	0.0135817	1.01167
444	32.15	36.43	49.35	44.34	38.78	tr|D3ZWC6|D3ZWC6_RAT	Protein Sntb1 OS=Rattus norvegicus GN=Sntb1 PE=1 SV=1	RAT	21	0.954993	0.963829	0.981748	0.990832	0.0145621	0.97285
445	31.99	34.47	70.05	63.2	58.38	sp|Q6AYD3|PA2G4_RAT	Proliferation-associated protein 2G4 OS=Rattus norvegicus GN=Pa2g4 PE=1 SV=1	RAT	20	0.937562	0.954993	0.870964	0.903649	0.0351914	0.916792
446	31.95	34.86	67.48	56.42	46.9	sp|P85834|EFTU_RAT	Elongation factor Tu, mitochondrial OS=Rattus norvegicus GN=Tufm PE=1 SV=1	RAT	24	1	1	0.824138	0.831764	0.0941675	0.913975
447	31.93	35.92	64.57	56.88	47.79	tr|A0A0G2JUL7|A0A0G2JUL7_RAT	Septin 6 (Predicted), isoform CRA_b OS=Rattus norvegicus GN=Sept11 PE=1 SV=1	RAT	34	1	0.831764	1.01859	0.847227	0.0923084	0.924396
448	31.91	38.79	61.5	53.76	49.2	sp|P04182|OAT_RAT	Ornithine aminotransferase, mitochondrial OS=Rattus norvegicus GN=Oat PE=1 SV=1	RAT	26	1.1272	1.25893	1.02802	1.14815	0.071916	1.14057
449	31.88	35.01	73.39	70.64	61.16	sp|P52944|PDLI1_RAT	PDZ and LIM domain protein 1 OS=Rattus norvegicus GN=Pdlim1 PE=1 SV=4	RAT	24	0.57544	0.698232	0.544503	0.666807	0.101774	0.621245
450	31.83	31.95	54.86	46.06	41.67	tr|F7EUK4|F7EUK4_RAT	Protein Kng2 OS=Rattus norvegicus GN=Kng1l1 PE=1 SV=2	RAT	23	1.10662	0.744732	1.39316	0.937562	0.227707	1.04552
451	31.82	34.51	41.75	34.12	30.37	tr|M0R961|M0R961_RAT	Far upstream element-binding protein 2 OS=Rattus norvegicus GN=Khsrp PE=1 SV=1	RAT	27	1.08643	0.679204	1.19124	0.744732	0.235424	0.925401
452	31.79	40.09	23.64	13.95	7.931	tr|D3ZLS5|D3ZLS5_RAT	Protein Hectd1 OS=Rattus norvegicus GN=Hectd1 PE=1 SV=3	RAT	28	1	1	1.05682	1.05682	0.027624	1.02841
453	31.77	39.42	25.41	18.78	14.51	tr|D4AE58|D4AE58_RAT	Protein Kank1 OS=Rattus norvegicus GN=Kank1 PE=1 SV=2	RAT	25	0.801678	0.954993	0.895365	1.0666	0.103382	0.929658
454	31.65	34.27	52.5	45.56	36.67	sp|Q99068|AMRP_RAT	Alpha-2-macroglobulin receptor-associated protein OS=Rattus norvegicus GN=Lrpap1 PE=1 SV=2	RAT	22	0.847227	1.02802	0.772681	0.954993	0.108786	0.900729
455	31.58	34.39	64.62	57.38	50.7	tr|A0A0G2K151|A0A0G2K151_RAT	Apolipoprotein E OS=Rattus norvegicus GN=Apoe PE=1 SV=1	RAT	40	0.903649	0.870964	0.937562	0.895365	0.0264407	0.901885
456	31.51	33.56	67.3	57.3	48.11	sp|Q6DGG0|PPID_RAT	Peptidyl-prolyl cis-trans isomerase D OS=Rattus norvegicus GN=Ppid PE=1 SV=3	RAT	19	1.11686	0.831764	1	0.758578	0.151455	0.926801
457	31.5	33.56	42.71	32.83	27.36	tr|G3V7N5|G3V7N5_RAT	Carnitine O-palmitoyltransferase 2, mitochondrial OS=Rattus norvegicus GN=Cpt2 PE=1 SV=1	RAT	19	0.870964	1.34276	1.20226	1.77011	0.248856	1.29653
458	31.49	34.04	64.13	55.43	36.74	sp|P20059|HEMO_RAT	Hemopexin OS=Rattus norvegicus GN=Hpx PE=1 SV=3	RAT	29	0.608135	0.619441	0.816582	0.831764	0.146604	0.718981
459	31.47	35.59	60.55	52.61	40.69	sp|P21531|RL3_RAT	60S ribosomal protein L3 OS=Rattus norvegicus GN=Rpl3 PE=1 SV=3	RAT	23	1	0.972747	1	0.972747	0.0138146	0.986374
460	31.47	34.5	49.26	39.47	36.2	sp|P13264|GLSK_RAT	Glutaminase kidney isoform, mitochondrial OS=Rattus norvegicus GN=Gls PE=1 SV=2	RAT	23	0.937562	1.02802	0.887156	0.972747	0.0536886	0.95637
461	31.42	31.92	54.74	45.05	38.95	tr|B1WC67|B1WC67_RAT	Protein Slc25a24 OS=Rattus norvegicus GN=Slc25a24 PE=1 SV=1	RAT	19	0.963829	1	0.879023	0.92045	0.0483167	0.940825
462	31.41	31.57	57.29	50.6	38.94	tr|D3ZGQ1|D3ZGQ1_RAT	Torsin A interacting protein 1, isoform CRA_b OS=Rattus norvegicus GN=Tor1aip1 PE=1 SV=2	RAT	22	1.0666	0.990832	0.895365	0.824138	0.0975761	0.944233
463	31.35	32.06	76.85	69.46	61.07	tr|D3ZVB7|D3ZVB7_RAT	Osteoglycin (Predicted) OS=Rattus norvegicus GN=Ogn PE=1 SV=1	RAT	58	0.648634	0.666807	0.60256	0.619441	0.039334	0.63436
464	31.3	35.12	55.49	48.1	41.52	tr|A9CMB7|A9CMB7_RAT	Aspartate--tRNA ligase, cytoplasmic OS=Rattus norvegicus GN=Dars PE=1 SV=1	RAT	19	0.954993	0.937562	0.990832	0.972747	0.0205937	0.964033
465	31.27	35.33	38.5	28.38	22.77	tr|D3ZJR1|D3ZJR1_RAT	Protein Eps15l1 OS=Rattus norvegicus GN=Eps15l1 PE=1 SV=3	RAT	20	0.981748	1.01859	0.937562	0.972747	0.0294861	0.977662
466	31.26	35.57	27.9	18.64	11.35	tr|E9PU01|E9PU01_RAT	Protein Chd4 OS=Rattus norvegicus GN=Chd4 PE=1 SV=3	RAT	20	0.895365	0.879023	1	0.990832	0.0579145	0.941305
467	31.14	32.98	56.82	44.81	39.31	sp|Q80Z29|NAMPT_RAT	Nicotinamide phosphoribosyltransferase OS=Rattus norvegicus GN=Nampt PE=1 SV=1	RAT	21	1.20226	1.04713	1.11686	0.981748	0.075366	1.087
468	31.11	35.21	50.66	39.55	30.51	tr|A0A0G2JSI0|A0A0G2JSI0_RAT	Dimethylaniline monooxygenase [N-oxide-forming] OS=Rattus norvegicus GN=Fmo3 PE=1 SV=1	N-oxide-forming	26	1.03753	1.00925	0.92045	0.895365	0.0613764	0.965649
469	31.1	35.57	43.82	31.18	24.31	tr|G3V7G8|G3V7G8_RAT	Glycine--tRNA ligase OS=Rattus norvegicus GN=Gars PE=1 SV=1	RAT	20	0.972747	1.0666	0.92045	1.01859	0.0544581	0.994596
470	31.09	31.13	61.58	48.93	41.53	tr|A0A0G2K1C0|A0A0G2K1C0_RAT	Actin-related protein 3 OS=Rattus norvegicus GN=Actr3 PE=1 SV=1	RAT	29	1.1272	1.13763	1.02802	1.02802	0.0484423	1.08021
471	31.01	33.03	43.59	37.54	32.03	tr|M0R735|M0R735_RAT	Heterogeneous nuclear ribonucleoprotein Q OS=Rattus norvegicus GN=Syncrip PE=1 SV=2	RAT	21	0.981748	1	0.887156	0.895365	0.0534573	0.941067
472	31	31.8	43.86	35.12	27.5	tr|A0A0G2K1M8|A0A0G2K1M8_RAT	Prolyl endopeptidase OS=Rattus norvegicus GN=Prep PE=1 SV=1	RAT	17	0.937562	0.946237	0.847227	0.862979	0.0488163	0.898501
473	30.98	31.24	78.57	75.16	66.77	sp|P20760|IGG2A_RAT	Ig gamma-2A chain C region OS=Rattus norvegicus GN=Igg-2a PE=1 SV=1	RAT	38	1.1272	0.510505	0.92045	0.42462	0.387793	0.745693
474	30.97	34.85	47.01	40.23	33.44	sp|P20595|GCYB1_RAT	Guanylate cyclase soluble subunit beta-1 OS=Rattus norvegicus GN=Gucy1b3 PE=1 SV=2	RAT	23	0.990832	1.13763	0.831764	0.954993	0.111399	0.978804
475	30.96	36.9	45.73	43.74	33.8	tr|Q5XI77|Q5XI77_RAT	Annexin OS=Rattus norvegicus GN=Anxa11 PE=1 SV=1	RAT	24	0.972747	0.963829	0.981748	0.972747	0.00651267	0.972768
476	30.93	31.08	61.47	57.02	53.23	tr|A0A0G2JTG7|A0A0G2JTG7_RAT	Heterogeneous nuclear ribonucleoprotein H OS=Rattus norvegicus GN=Hnrnph1 PE=1 SV=1	RAT	26	0.870964	0.972747	0.862979	0.963829	0.0553982	0.91763
477	30.87	31.07	48.51	44.16	37.82	sp|Q6AYT3|RTCB_RAT	tRNA-splicing ligase RtcB homolog OS=Rattus norvegicus GN=Rtcb PE=2 SV=1	RAT	21	0.990832	0.972747	0.972747	0.954993	0.0130253	0.97283
478	30.75	33.04	54.29	43.74	38.9	sp|P07687|HYEP_RAT	Epoxide hydrolase 1 OS=Rattus norvegicus GN=Ephx1 PE=1 SV=1	RAT	22	1.23595	1.00925	0.928966	0.758578	0.174661	0.983186
479	30.74	38.61	40.97	35.21	29.32	tr|A0A0G2JT93|A0A0G2JT93_RAT	Catenin (Cadherin associated protein), beta 1, isoform CRA_a OS=Rattus norvegicus GN=Ctnnb1 PE=1 SV=1	RAT	20	0.954993	0.954993	0.981748	0.981748	0.0138146	0.96837
480	30.69	33.33	36.55	29.53	22.72	sp|B5DFC8|EIF3C_RAT	Eukaryotic translation initiation factor 3 subunit C OS=Rattus norvegicus GN=Eif3c PE=1 SV=1	RAT	19	0.963829	0.990832	0.990832	1.00925	0.0163878	0.988686
481	30.66	30.81	43.49	36.19	31.59	tr|A0A0G2K757|A0A0G2K757_RAT	Dolichyl-diphosphooligosaccharide--protein glycosyltransferase subunit 2 OS=Rattus norvegicus GN=Rpn2 PE=1 SV=1	RAT	25	0.937562	0.954993	0.954993	0.972747	0.0130253	0.955074
482	30.64	31.35	72.01	60.07	49.15	sp|P27952|RS2_RAT	40S ribosomal protein S2 OS=Rattus norvegicus GN=Rps2 PE=1 SV=1	RAT	23	1.13763	1.21339	0.809096	0.855067	0.173888	1.00379
483	30.58	34.28	59.01	51.35	44.51	sp|P85968|6PGD_RAT	6-phosphogluconate dehydrogenase, decarboxylating OS=Rattus norvegicus GN=Pgd PE=1 SV=1	RAT	24	1.05682	1.27057	0.92045	1.11686	0.115169	1.09118
484	30.53	30.69	45.96	42.03	36.02	tr|Q1PBJ1|Q1PBJ1_RAT	Lactadherin OS=Rattus norvegicus GN=Mfge8 PE=1 SV=1	RAT	23	1.39316	1.7378	1.27057	1.59956	0.1204	1.50027
485	30.31	38.89	40.6	29.13	17.46	tr|D4ABM3|D4ABM3_RAT	Dishevelled associated activator of morphogenesis 1 (Predicted) OS=Rattus norvegicus GN=Daam1 PE=1 SV=1	RAT	22	0.946237	0.912011	0.794328	0.772681	0.0866554	0.856314
486	30.31	32.85	79.86	74.91	72.08	sp|Q9Z2L0|VDAC1_RAT	Voltage-dependent anion-selective channel protein 1 OS=Rattus norvegicus GN=Vdac1 PE=1 SV=4	RAT	24	1.15878	0.972747	0.963829	0.801678	0.129775	0.974258
487	30.22	30.71	83.95	69.9	52.17	sp|Q5XIH7|PHB2_RAT	Prohibitin-2 OS=Rattus norvegicus GN=Phb2 PE=1 SV=1	RAT	20	0.981748	1.01859	0.912011	0.954993	0.0402151	0.966836
488	30.18	34.46	98.68	98.68	95.36	tr|A0A0G2K6J5|A0A0G2K6J5_RAT	Protein LOC102551071 OS=Rattus norvegicus GN=Myl6 PE=1 SV=1	RAT	73	1.31826	1.8197	0.642688	0.903649	0.38023	1.17107
489	30.14	33.06	30.98	21.63	17.35	tr|G3V9G1|G3V9G1_RAT	Adenylate cyclase 5 OS=Rattus norvegicus GN=Adcy5 PE=3 SV=1	RAT	27	0.954993	1.04713	0.92045	1.00925	0.0495755	0.982956
490	30.1	30.96	46.5	37.79	26.44	tr|Q6QI48|Q6QI48_RAT	LRRGT00160 OS=Rattus norvegicus GN=Podn PE=1 SV=1	RAT	23	0.928966	1.03753	1.31826	1.45881	0.178894	1.18589
491	30.08	36.35	35.76	25.28	21.75	tr|D3ZXA6|D3ZXA6_RAT	Protein Pdpr OS=Rattus norvegicus GN=Pdpr PE=1 SV=1	RAT	22	0.937562	1.01859	0.92045	1	0.0424361	0.969151
492	30.06	38.4	75.55	70.85	58.31	tr|Q5U362|Q5U362_RAT	Annexin OS=Rattus norvegicus GN=Anxa4 PE=1 SV=1	RAT	29	1.10662	0.963829	0.972747	0.847227	0.0944536	0.972607
493	30.05	30.5	47.33	39.68	33.63	tr|A0A0G2JVM0|A0A0G2JVM0_RAT	Delta-1-pyrroline-5-carboxylate dehydrogenase, mitochondrial OS=Rattus norvegicus GN=Aldh4a1 PE=1 SV=1	RAT	20	1	0.972747	0.972747	0.946237	0.0195378	0.972933
494	29.96	31.11	58.87	46.27	30.33	tr|F7FKI5|F7FKI5_RAT	Pyruvate dehydrogenase E1 component subunit alpha OS=Rattus norvegicus GN=Pdha1 PE=1 SV=2	RAT	21	0.937562	1.23595	1.21339	1.58489	0.18483	1.24295
495	29.95	32.24	29.85	22.29	16.92	tr|A0A0G2K1E2|A0A0G2K1E2_RAT	Integrin alpha 5 (Mapped) OS=Rattus norvegicus GN=Itga5 PE=1 SV=1	RAT	18	4.44631	3.59749	3.10456	2.46604	0.212543	3.4036
496	29.9	30.27	76.35	66.77	59.28	sp|O88989|MDHC_RAT	Malate dehydrogenase, cytoplasmic OS=Rattus norvegicus GN=Mdh1 PE=1 SV=3	RAT	32	1.11686	1.87068	0.597035	0.954993	0.409367	1.13489
497	29.83	37.86	29.13	16.99	11.56	tr|D3ZV52|D3ZV52_RAT	Intersectin 1 OS=Rattus norvegicus GN=Itsn1 PE=1 SV=3	RAT	23	0.772681	0.731139	0.711214	0.666807	0.0528772	0.72046
498	29.8	30.84	75.33	67	50.67	tr|A0A0G2K9A2|A0A0G2K9A2_RAT	Actin related protein 2/3 complex, subunit 2 (Predicted), isoform CRA_a OS=Rattus norvegicus GN=Arpc2 PE=1 SV=1	RAT	24	1.27057	1.1272	0.862979	0.751623	0.205409	1.00309
499	29.72	41.18	69.1	50.94	38.01	sp|Q641Z6|EHD1_RAT	EH domain-containing protein 1 OS=Rattus norvegicus GN=Ehd1 PE=1 SV=1	RAT	28	0.92045	0.937562	0.731139	0.737904	0.117172	0.831764
500	29.7	32.38	62.53	58.22	52.56	sp|Q02874|H2AY_RAT	Core histone macro-H2A.1 OS=Rattus norvegicus GN=H2afy PE=1 SV=4	RAT	28	0.887156	0.855067	0.870964	0.847227	0.017729	0.865103
501	29.67	32.35	37	29.06	18.56	sp|Q66HC5|NUP93_RAT	Nuclear pore complex protein Nup93 OS=Rattus norvegicus GN=Nup93 PE=1 SV=1	RAT	18	0.963829	1.0666	0.824138	0.912011	0.0931741	0.941644
502	29.64	32.08	48.64	42.08	31.04	tr|B1WC61|B1WC61_RAT	Acad9 protein OS=Rattus norvegicus GN=Acad9 PE=1 SV=1	RAT	19	0.963829	0.990832	0.937562	0.954993	0.0200046	0.961804
503	29.59	29.87	34.56	27.6	25.27	sp|P13676|ACPH_RAT	Acylamino-acid-releasing enzyme OS=Rattus norvegicus GN=Apeh PE=1 SV=1	RAT	21	1.18032	1.07647	1.01859	0.928966	0.0868261	1.05109
504	29.47	36.48	42.66	36.14	26.47	sp|Q4G061|EIF3B_RAT	Eukaryotic translation initiation factor 3 subunit B OS=Rattus norvegicus GN=Eif3b PE=1 SV=1	RAT	22	0.981748	1.02802	0.954993	1.00925	0.0278416	0.993502
505	29.43	33.73	68.08	55.08	43.79	sp|Q01129|PGS2_RAT	Decorin OS=Rattus norvegicus GN=Dcn PE=1 SV=1	RAT	31	1.0666	0.648634	0.724436	0.444631	0.310927	0.721074
506	29.36	29.67	70.45	57.78	52.77	tr|Q6P9U0|Q6P9U0_RAT	Protein Serpinb6 OS=Rattus norvegicus GN=Serpinb6 PE=1 SV=1	RAT	29	1.03753	1.14815	0.831764	0.92045	0.121283	0.984474
507	29.34	30.83	67.16	59.8	52.7	tr|A0A0H2UHI5|A0A0H2UHI5_RAT	Protein LOC299282 OS=Rattus norvegicus GN=Serpina3n PE=1 SV=1	RAT	29	0.731139	1.94089	1.01859	2.65461	0.480157	1.58631
508	29.28	33.24	26.02	20.41	14.07	tr|F1LMA7|F1LMA7_RAT	C-type mannose receptor 2 OS=Rattus norvegicus GN=Mrc2 PE=4 SV=2	RAT	22	0.855067	0.990832	0.704693	0.816582	0.121468	0.841794
509	29.28	33.06	32.06	22.54	14.7	sp|P47820|ACE_RAT	Angiotensin-converting enzyme OS=Rattus norvegicus GN=Ace PE=1 SV=1	RAT	19	1.61436	1.85353	0.751623	0.870964	0.370029	1.27262
510	29.26	29.33	39.86	34.75	31.69	tr|D3ZWD6|D3ZWD6_RAT	Complement component 8, alpha polypeptide (Predicted) OS=Rattus norvegicus GN=C8a PE=1 SV=1	RAT	16	0.672977	0.704693	0.744732	0.787046	0.0588755	0.727362
511	29.25	33.17	44.39	34.74	29.91	tr|D3ZA22|D3ZA22_RAT	Protein Trim47 OS=Rattus norvegicus GN=Trim47 PE=1 SV=1	RAT	18	1.01859	1.00925	1.01859	1.00925	0.00460514	1.01392
512	29.2	31.86	45.85	35.46	29.71	tr|Q5XIM7|Q5XIM7_RAT	Lysine--tRNA ligase OS=Rattus norvegicus GN=Kars PE=1 SV=1	RAT	23	0.963829	0.981748	0.972747	0.990832	0.0102973	0.977289
513	29.15	30.26	49.16	40.48	33.73	sp|P38656|LA_RAT	Lupus La protein homolog OS=Rattus norvegicus GN=Ssb PE=1 SV=1	RAT	19	1.05682	1.04713	0.990832	0.990832	0.0301173	1.0214
514	29.1	30.46	45.9	40.54	28.23	tr|G3V7X5|G3V7X5_RAT	SPARC-like 1 (Mast9, hevin), isoform CRA_a OS=Rattus norvegicus GN=Sparcl1 PE=1 SV=1	RAT	16	0.928966	1.04713	1	1.1272	0.0702598	1.02582
515	29.05	30.33	57.24	51.38	47.93	sp|P14604|ECHM_RAT	Enoyl-CoA hydratase, mitochondrial OS=Rattus norvegicus GN=Echs1 PE=1 SV=1	RAT	22	1.24738	1.36773	0.92045	1.00925	0.157829	1.1362
516	29.05	29.9	61.34	55.09	44.91	sp|P70584|ACDSB_RAT	Short/branched chain specific acyl-CoA dehydrogenase, mitochondrial OS=Rattus norvegicus GN=Acadsb PE=1 SV=1	RAT	20	1	1.31826	1.13763	1.47231	0.145148	1.23205
517	29	30.48	63.25	58.53	40.42	sp|P09456|KAP0_RAT	cAMP-dependent protein kinase type I-alpha regulatory subunit OS=Rattus norvegicus GN=Prkar1a PE=1 SV=2	RAT	21	1.00925	1.05682	0.972747	1.01859	0.0294861	1.01435
518	28.93	29.15	35.09	27.51	23.03	tr|Q498N4|Q498N4_RAT	Phosphatidylinositol binding clathrin assembly protein, isoform CRA_c OS=Rattus norvegicus GN=Picalm PE=1 SV=1	RAT	16	0.855067	0.946237	0.801678	0.879023	0.0596456	0.870501
519	28.92	30.64	47.42	36.45	29.19	tr|F7FLB2|F7FLB2_RAT	Pgm2 protein OS=Rattus norvegicus GN=Pgm2 PE=1 SV=2	RAT	17	1.0666	1.27057	0.879023	1.03753	0.130972	1.06343
520	28.86	29.36	53.23	43.41	40.05	tr|C0KUC6|C0KUC6_RAT	LIM and senescent cell antigen-like domains 1 isoform E OS=Rattus norvegicus GN=Lims1 PE=1 SV=1	RAT	22	0.928966	0.895365	0.928966	0.895365	0.0184186	0.912166
521	28.81	29.04	77.05	68.85	68.85	sp|Q920P0|DCXR_RAT	L-xylulose reductase OS=Rattus norvegicus GN=Dcxr PE=1 SV=1	RAT	22	0.831764	0.824138	0.809096	0.801678	0.0145621	0.816669
522	28.76	35.31	51.95	39.89	33.4	sp|Q7TPB1|TCPD_RAT	T-complex protein 1 subunit delta OS=Rattus norvegicus GN=Cct4 PE=1 SV=3	RAT	26	0.990832	1.01859	0.963829	0.990832	0.0195378	0.991021
523	28.73	29.8	70.81	62.14	55.78	tr|A0A0H2UHM3|A0A0H2UHM3_RAT	Haptoglobin OS=Rattus norvegicus GN=Hp PE=1 SV=1	RAT	20	0.501187	0.448745	0.660693	0.597035	0.149097	0.551915
524	28.73	29.05	54.58	50	43.33	sp|Q68FY0|QCR1_RAT	Cytochrome b-c1 complex subunit 1, mitochondrial OS=Rattus norvegicus GN=Uqcrc1 PE=1 SV=1	RAT	22	0.954993	0.990832	0.937562	0.972747	0.0205937	0.964033
525	28.67	29.52	64.43	57.7	49.89	sp|Q99PD6|TGFI1_RAT	Transforming growth factor beta-1-induced transcript 1 protein OS=Rattus norvegicus GN=Tgfb1i1 PE=1 SV=2	RAT	30	0.529663	0.744732	0.765597	1.10662	0.262548	0.786654
526	28.58	33.41	57.86	52.16	40.77	tr|D4A6C5|D4A6C5_RAT	Protein Arhgap1 OS=Rattus norvegicus GN=Arhgap1 PE=1 SV=1	RAT	26	0.855067	1.04713	0.691831	0.847227	0.146436	0.860313
527	28.57	49.35	91.53	76.21	67.34	sp|P09495|TPM4_RAT	Tropomyosin alpha-4 chain OS=Rattus norvegicus GN=Tpm4 PE=1 SV=3	RAT	40	1.00925	1.01859	0.990832	1	0.0102973	1.00467
528	28.53	29.75	56.43	47.38	40.48	tr|A0A0G2JUC7|A0A0G2JUC7_RAT	Dynactin subunit 2 OS=Rattus norvegicus GN=Dctn2 PE=1 SV=1	RAT	22	1.00925	0.990832	0.928966	0.912011	0.0424361	0.960266
529	28.52	30.75	45.97	36.96	31.14	sp|P15791|KCC2D_RAT	Calcium/calmodulin-dependent protein kinase type II subunit delta OS=Rattus norvegicus GN=Camk2d PE=1 SV=1	RAT	18	1.01859	0.963829	0.990832	0.937562	0.0308881	0.977704
530	28.5	32.6	50.82	40.59	29.43	sp|P97531|CIP4_RAT	Cdc42-interacting protein 4 OS=Rattus norvegicus GN=Trip10 PE=1 SV=3	RAT	17	0.937562	1.19124	0.744732	0.954993	0.16545	0.957132
531	28.5	31.22	42.17	29.99	25.3	sp|B4F7E8|NIBL1_RAT	Niban-like protein 1 OS=Rattus norvegicus GN=Fam129b PE=1 SV=1	RAT	21	0.787046	0.887156	0.751623	0.83946	0.0630489	0.816321
532	28.4	28.47	83.9	80.98	78.05	sp|Q6NYB7|RAB1A_RAT	Ras-related protein Rab-1A OS=Rattus norvegicus GN=Rab1A PE=1 SV=3	RAT	23	0.937562	0.903649	0.972747	0.937562	0.02605	0.93788
533	28.39	31.28	57.67	46	36.5	tr|Q6IRJ7|Q6IRJ7_RAT	Annexin OS=Rattus norvegicus GN=Anxa7 PE=1 SV=1	RAT	21	1.35519	1.13763	1.64437	1.38038	0.130316	1.37939
534	28.36	34.22	54.41	45.38	39.14	tr|F1LM47|F1LM47_RAT	Succinyl-CoA ligase subunit beta OS=Rattus norvegicus GN=Sucla2 PE=1 SV=1	RAT	21	1.09648	1.36773	0.887156	1.10662	0.152929	1.1145
535	28.32	29.05	66.18	66.18	56.99	sp|Q5XI32|CAPZB_RAT	F-actin-capping protein subunit beta OS=Rattus norvegicus GN=Capzb PE=1 SV=1	RAT	25	1.21339	1.22462	1.03753	1.04713	0.0782648	1.13067
536	28.29	30	36.3	27.28	19.91	tr|A0A0G2K1M7|A0A0G2K1M7_RAT	Anoctamin OS=Rattus norvegicus GN=Ano6 PE=1 SV=1	RAT	18	1.04713	0.879023	0.870964	0.737904	0.124146	0.883755
537	28.27	33.28	67.77	57.11	50.51	sp|Q5M7U6|ARP2_RAT	Actin-related protein 2 OS=Rattus norvegicus GN=Actr2 PE=2 SV=1	RAT	30	1.04713	0.990832	1.1272	1.07647	0.0465248	1.06041
538	28.24	32.99	39.25	31.49	19.73	tr|D3Z941|D3Z941_RAT	Protein Mars OS=Rattus norvegicus GN=Mars PE=1 SV=1	RAT	20	0.903649	1.09648	0.862979	1.04713	0.0991437	0.977559
539	28.24	28.48	54.83	47.19	42.25	sp|P02680|FIBG_RAT	Fibrinogen gamma chain OS=Rattus norvegicus GN=Fgg PE=1 SV=3	RAT	20	0.457088	0.328095	0.711214	0.510505	0.274918	0.501726
540	28.21	28.72	55.04	45.38	38.87	sp|Q5FVM4|NONO_RAT	Non-POU domain-containing octamer-binding protein OS=Rattus norvegicus GN=Nono PE=1 SV=3	RAT	17	1.05682	1	1.1272	1.0666	0.0424539	1.06265
541	28.2	29.04	43.25	32.73	24.81	sp|P52631|STAT3_RAT	Signal transducer and activator of transcription 3 OS=Rattus norvegicus GN=Stat3 PE=1 SV=1	RAT	18	0.963829	0.963829	1	1	0.0184186	0.981915
542	28.12	30.66	40.57	31.57	25	tr|A0A0G2K896|A0A0G2K896_RAT	Protein RGD1310507 OS=Rattus norvegicus GN=RGD1310507 PE=1 SV=1	RAT	17	1.20226	0.794328	1.33045	0.879023	0.210746	1.05152
543	28.08	36.15	26.4	15.28	9.037	tr|A0A0G2JX74|A0A0G2JX74_RAT	Serine/threonine-protein kinase mTOR OS=Rattus norvegicus GN=Mtor PE=1 SV=1	RAT	28	1.02802	0.870964	1.15878	0.990832	0.101408	1.01215
544	28.06	29.04	54.9	46.7	37.13	tr|Q5U2X8|Q5U2X8_RAT	Acyl-CoA thioesterase 9 OS=Rattus norvegicus GN=Acot9 PE=1 SV=1	RAT	16	1.31826	1.07647	1.0666	0.862979	0.14919	1.08107
545	28.05	30.68	42.09	34.05	29.02	tr|F1MAH6|F1MAH6_RAT	Protein Cdh11 OS=Rattus norvegicus GN=Cdh11 PE=1 SV=1	RAT	21	0.954993	0.990832	0.963829	1	0.0189858	0.977413
546	28.04	28.08	78.9	68.35	66.06	sp|D3Z8L7|RRAS_RAT	Ras-related protein R-Ras OS=Rattus norvegicus GN=Rras PE=1 SV=1	RAT	19	1.05682	1.38038	1.31826	1.69044	0.165572	1.36147
547	28.03	32.18	27.08	18.54	11.45	tr|F1M8X9|F1M8X9_RAT	Protein Gbf1 OS=Rattus norvegicus GN=Gbf1 PE=1 SV=2	RAT	24	0.954993	0.990832	1.05682	1.10662	0.0570127	1.02732
548	28	32.77	33.5	29.44	22.08	tr|M0RCF3|M0RCF3_RAT	Integrin beta OS=Rattus norvegicus GN=Itgb3 PE=1 SV=2	RAT	19	0.981748	0.60256	0.879023	0.544503	0.243683	0.751958
549	27.93	28.02	30.97	21.26	17.67	sp|Q4FZU4|ATL4_RAT	ADAMTS-like protein 4 OS=Rattus norvegicus GN=Adamtsl4 PE=2 SV=1	RAT	19	0.831764	0.751623	1.00925	0.887156	0.107772	0.869949
550	27.91	31.53	50.98	39.76	28.74	tr|Q4V8I9|Q4V8I9_RAT	Protein Ugp2 OS=Rattus norvegicus GN=Ugp2 PE=1 SV=1	RAT	18	1.36773	1.34276	1.10662	1.08643	0.10593	1.22589
551	27.88	28.34	58.13	50.99	38.92	tr|Q6P3V8|Q6P3V8_RAT	Eukaryotic translation initiation factor 4A1 OS=Rattus norvegicus GN=Eif4a1 PE=1 SV=1	RAT	19	0.981748	1.03753	0.954993	1.01859	0.0320732	0.998215
552	27.86	30.63	45.85	35.38	28.77	tr|G3V6V1|G3V6V1_RAT	Aminopeptidase B OS=Rattus norvegicus GN=Rnpep PE=1 SV=1	RAT	18	1.01859	1.00925	0.990832	0.990832	0.0119794	1.00238
553	27.85	30.92	52.24	36.36	24.82	sp|Q4V7C6|GUAA_RAT	GMP synthase [glutamine-hydrolyzing] OS=Rattus norvegicus GN=Gmps PE=1 SV=1	RAT	16	0.990832	0.981748	1	0.990832	0.00651269	0.990853
554	27.82	35.16	33.28	25.92	17.98	tr|F1LPM3|F1LPM3_RAT	Sorbin and SH3 domain-containing protein 2 OS=Rattus norvegicus GN=Sorbs2 PE=1 SV=2	RAT	23	0.937562	1.21339	0.711214	0.928966	0.18798	0.947783
555	27.8	32.46	35.51	25.61	13.51	tr|A0A0G2K139|A0A0G2K139_RAT	Cullin-associated NEDD8-dissociated protein 2 OS=Rattus norvegicus GN=Cand2 PE=4 SV=1	RAT	17	0.963829	0.954993	0.990832	0.981748	0.0145621	0.97285
556	27.77	30.82	56.63	47.42	36.85	sp|Q641X8|EIF3E_RAT	Eukaryotic translation initiation factor 3 subunit E OS=Rattus norvegicus GN=Eif3e PE=2 SV=1	RAT	16	0.963829	0.954993	0.963829	0.963829	0.00397901	0.96162
557	27.74	32.1	71.11	61.59	59.68	sp|P68101|IF2A_RAT	Eukaryotic translation initiation factor 2 subunit 1 OS=Rattus norvegicus GN=Eif2s1 PE=1 SV=2	RAT	19	1.00925	1.01859	1.00925	1.01859	0.00460514	1.01392
558	27.72	33.44	36.41	25.69	19.58	tr|F1LN92|F1LN92_RAT	Protein Afg3l2 OS=Rattus norvegicus GN=Afg3l2 PE=1 SV=1	RAT	20	0.981748	0.972747	0.928966	0.92045	0.0280055	0.950978
559	27.67	33.16	69.16	62.17	52.53	tr|A0A0G2JZ73|A0A0G2JZ73_RAT	Alpha-1-antiproteinase OS=Rattus norvegicus GN=Serpina1 PE=1 SV=1	RAT	27	0.549541	0.765597	0.691831	0.990832	0.212873	0.74945
560	27.59	30.18	69.12	67.06	60.29	sp|P54311|GBB1_RAT	Guanine nucleotide-binding protein G(I)/G(S)/G(T) subunit beta-1 OS=Rattus norvegicus GN=Gnb1 PE=1 SV=4	RAT	28	1.05682	0.981748	1.03753	0.963829	0.0379605	1.00998
561	27.48	27.7	49.13	34.72	31	sp|Q9QVC8|FKBP4_RAT	Peptidyl-prolyl cis-trans isomerase FKBP4 OS=Rattus norvegicus GN=Fkbp4 PE=1 SV=3	RAT	14	1.10662	1.13763	1.03753	1.0666	0.0350641	1.08709
562	27.45	27.57	57.93	43.07	37.28	tr|G3V7Z4|G3V7Z4_RAT	Glia-derived nexin OS=Rattus norvegicus GN=Serpine2 PE=1 SV=1	RAT	21	0.717794	1.03753	0.887156	1.2942	0.215143	0.984169
563	27.42	29.53	46.68	33.96	30.78	sp|Q2PS20|JPH2_RAT	Junctophilin-2 OS=Rattus norvegicus GN=Jph2 PE=1 SV=1	RAT	21	0.963829	0.981748	0.990832	1	0.0135817	0.984102
564	27.4	28.98	72.39	61.96	54.6	tr|D3ZH41|D3ZH41_RAT	Cytoskeleton-associated protein 4 (Predicted) OS=Rattus norvegicus GN=Ckap4 PE=1 SV=2	RAT	21	0.824138	1.1272	0.794328	1.07647	0.154648	0.955532
565	27.36	33.85	37.68	27.58	16.88	sp|P35559|IDE_RAT	Insulin-degrading enzyme OS=Rattus norvegicus GN=Ide PE=1 SV=1	RAT	19	0.972747	1.03753	1	1.0666	0.0350642	1.01922
566	27.33	30.77	36.65	22.94	15.43	sp|Q5FVC2|ARHG2_RAT	Rho guanine nucleotide exchange factor 2 OS=Rattus norvegicus GN=Arhgef2 PE=1 SV=1	RAT	17	0.963829	0.990832	0.990832	1.01859	0.0195378	0.991021
567	27.29	39.07	40.84	25.68	19.05	sp|Q924S5|LONM_RAT	Lon protease homolog, mitochondrial OS=Rattus norvegicus GN=Lonp1 PE=2 SV=1	RAT	24	0.990832	0.937562	1.04713	1	0.0391428	0.993881
568	27.25	35.7	42.01	33.63	24.49	sp|P47860|PFKAP_RAT	ATP-dependent 6-phosphofructokinase, platelet type OS=Rattus norvegicus GN=Pfkp PE=1 SV=2	RAT	21	1.18032	1.22462	1.11686	1.1695	0.0326944	1.17282
569	27.2	28.79	33.04	24.21	18.54	tr|G3V8K7|G3V8K7_RAT	Signal transducer and activator of transcription OS=Rattus norvegicus GN=Stat5a PE=1 SV=1	RAT	16	0.912011	0.928966	1	1.00925	0.0442775	0.962558
570	27.18	28.47	47.35	33.05	21.89	sp|P18163|ACSL1_RAT	Long-chain-fatty-acid--CoA ligase 1 OS=Rattus norvegicus GN=Acsl1 PE=1 SV=1	RAT	15	0.990832	1.33045	0.787046	1.05682	0.186617	1.04129
571	27.14	29.73	34.57	21.61	15.08	tr|F1LNL2|F1LNL2_RAT	Protein Smarca5 OS=Rattus norvegicus GN=Smarca5 PE=1 SV=2	RAT	17	1.05682	0.717794	1.1272	0.772681	0.191845	0.918622
572	27.08	27.6	78.87	76.29	68.56	sp|P39069|KAD1_RAT	Adenylate kinase isoenzyme 1 OS=Rattus norvegicus GN=Ak1 PE=1 SV=3	RAT	22	1.35519	1.28233	0.928966	0.887156	0.186352	1.11341
573	27.04	27.19	71.08	62.25	55.42	sp|Q9Z270|VAPA_RAT	Vesicle-associated membrane protein-associated protein A OS=Rattus norvegicus GN=Vapa PE=1 SV=3	RAT	25	1.20226	0.990832	1.07647	0.887156	0.111223	1.03918
574	26.96	30.19	52.79	40.98	28.52	sp|Q75Q39|TOM70_RAT	Mitochondrial import receptor subunit TOM70 OS=Rattus norvegicus GN=Tomm70a PE=1 SV=1	RAT	20	1.11686	1.0666	0.903649	0.862979	0.108034	0.987522
575	26.9	31.88	43.78	34.41	30.63	tr|F1LP30|F1LP30_RAT	Methylcrotonoyl-CoA carboxylase subunit alpha, mitochondrial OS=Rattus norvegicus GN=Mccc1 PE=1 SV=1	RAT	18	1.02802	1.03753	1.00925	1.01859	0.0102973	1.02335
576	26.89	27.59	36.05	29.04	24.14	tr|A0A0G2K8C1|A0A0G2K8C1_RAT	Protein Npnt OS=Rattus norvegicus GN=Npnt PE=1 SV=1	RAT	17	0.895365	0.887156	1.01859	1.00925	0.0645484	0.952591
577	26.86	31.43	33.82	23.37	17.75	tr|F1LQP9|F1LQP9_RAT	Protein Tnpo1 OS=Rattus norvegicus GN=Tnpo1 PE=1 SV=3	RAT	19	0.895365	1.01859	0.879023	1.00925	0.0670267	0.950558
578	26.83	29.77	59.86	46.08	38.48	sp|P50878|RL4_RAT	60S ribosomal protein L4 OS=Rattus norvegicus GN=Rpl4 PE=1 SV=3	RAT	21	1.19124	1.04713	0.990832	0.879023	0.109494	1.02706
579	26.78	26.95	46.73	39.2	30.49	tr|Q9JKC1|Q9JKC1_RAT	Carboxylic ester hydrolase OS=Rattus norvegicus GN=Bche PE=2 SV=1	RAT	19	0.636796	0.704693	0.496592	0.554626	0.132304	0.598177
580	26.76	34.98	36.88	23.24	14.35	tr|D4A2X2|D4A2X2_RAT	Unconventional myosin-Ib OS=Rattus norvegicus GN=Myo1b PE=1 SV=3	RAT	21	0.870964	0.613762	0.879023	0.619441	0.173295	0.745797
581	26.76	30.2	42.46	25.18	17.69	sp|D4A1F2|MICA2_RAT	Protein-methionine sulfoxide oxidase MICAL2 OS=Rattus norvegicus GN=Mical2 PE=3 SV=1	RAT	18	0.824138	0.954993	0.946237	1.09648	0.100955	0.955462
582	26.73	37.35	22.65	11.98	6.44	tr|F1M614|F1M614_RAT	Protein Lama2 OS=Rattus norvegicus GN=Lama2 PE=1 SV=3	RAT	23	0.937562	1.04713	1.1272	1.25893	0.107279	1.0927
583	26.7	28.18	42.21	35.14	31.52	tr|D3ZFX4|D3ZFX4_RAT	Phosphoglucomutase 3 (Predicted), isoform CRA_a OS=Rattus norvegicus GN=Pgm3 PE=1 SV=1	RAT	19	0.928966	1.03753	1.03753	1.1695	0.0816983	1.04338
584	26.68	27.3	46.19	37.9	30.96	sp|Q62920|PDLI5_RAT	PDZ and LIM domain protein 5 OS=Rattus norvegicus GN=Pdlim5 PE=1 SV=2	RAT	26	0.758578	0.855067	0.724436	0.824138	0.0653736	0.790555
585	26.67	32.63	32.3	20.85	13.25	tr|D3ZNS1|D3ZNS1_RAT	Pleckstrin homology-like domain family B member 1 OS=Rattus norvegicus GN=Phldb1 PE=1 SV=2	RAT	18	0.946237	1	0.963829	1.00925	0.0263038	0.97983
586	26.65	29.06	28.74	21.03	13.42	tr|F1LM09|F1LM09_RAT	Ubiquitin carboxyl-terminal hydrolase OS=Rattus norvegicus GN=Usp7 PE=1 SV=2	RAT	16	0.963829	0.92045	0.972747	0.928966	0.0234781	0.946498
587	26.58	28.62	64.66	61.79	60.86	tr|M0R7S5|M0R7S5_RAT	Protein Plin4 OS=Rattus norvegicus GN=Plin4 PE=4 SV=2	RAT	23	0.855067	0.83946	0.772681	0.758578	0.0514469	0.806446
588	26.57	32.57	51.38	41.34	26.97	tr|Q4QQV4|Q4QQV4_RAT	Dead end homolog 1 (Zebrafish) OS=Rattus norvegicus GN=Hars PE=1 SV=1	RAT	18	1.23595	1.0666	0.990832	0.862979	0.12988	1.03909
589	26.53	30.64	33.54	26.61	19.29	sp|B2GV24|UFL1_RAT	E3 UFM1-protein ligase 1 OS=Rattus norvegicus GN=Ufl1 PE=1 SV=1	RAT	19	1.02802	1.40605	1	1.48594	0.177281	1.23
590	26.53	28.82	46.56	36.45	33.59	sp|Q64303|PAK2_RAT	Serine/threonine-protein kinase PAK 2 OS=Rattus norvegicus GN=Pak2 PE=1 SV=1	RAT	19	1.04713	0.972747	1.02802	0.954993	0.0379605	1.00072
591	26.48	26.72	49.61	40.82	30.61	sp|P19468|GSH1_RAT	Glutamate--cysteine ligase catalytic subunit OS=Rattus norvegicus GN=Gclc PE=1 SV=2	RAT	15	0.990832	1	0.981748	0.990832	0.00651269	0.990853
592	26.47	26.96	45.05	31.68	25.82	tr|D3ZAI6|D3ZAI6_RAT	Protein Nt5dc3 OS=Rattus norvegicus GN=Nt5dc3 PE=1 SV=2	RAT	14	1.18032	1.30617	1.01859	1.1272	0.0893597	1.15807
593	26.43	28.79	49.3	41.82	35.28	sp|Q63413|DX39B_RAT	Spliceosome RNA helicase Ddx39b OS=Rattus norvegicus GN=Ddx39b PE=2 SV=3	RAT	19	1.01859	1	0.981748	0.963829	0.0205937	0.991042
594	26.35	27.71	49.47	36.52	33.16	tr|A0A0G2K6I4|A0A0G2K6I4_RAT	Protein Enah OS=Rattus norvegicus GN=Enah PE=1 SV=1	RAT	20	0.937562	0.972747	0.912011	0.954993	0.0237473	0.944328
595	26.35	27.63	83.42	81.91	70.35	sp|Q5XFX0|TAGL2_RAT	Transgelin-2 OS=Rattus norvegicus GN=Tagln2 PE=1 SV=1	RAT	41	0.972747	1.25893	0.758578	0.963829	0.180149	0.98852
596	26.33	30.44	31.52	24.74	20.15	tr|A0A0G2K8N9|A0A0G2K8N9_RAT	Protein Nek9 OS=Rattus norvegicus GN=Nek9 PE=1 SV=1	RAT	21	1.01859	0.963829	1.01859	0.954993	0.0300857	0.989001
597	26.3	29.2	54.48	46.44	32.87	sp|P84092|AP2M1_RAT	AP-2 complex subunit mu OS=Rattus norvegicus GN=Ap2m1 PE=1 SV=1	RAT	18	0.954993	0.937562	0.879023	0.862979	0.0424361	0.908639
598	26.27	26.41	44.44	35.96	31.11	tr|F1LPW0|F1LPW0_RAT	Protein Ighm OS=Rattus norvegicus GN=Ighm PE=1 SV=1	RAT	17	2.67917	0.744732	2.33346	0.666807	0.565956	1.60604
599	26.26	26.84	29.14	22.36	17.17	tr|F1M265|F1M265_RAT	Palladin OS=Rattus norvegicus GN=Palld PE=1 SV=3	RAT	16	0.887156	1.30617	0.691831	1	0.229147	0.971289
600	26.25	28.48	65.22	59.13	54.49	tr|Q5I0M1|Q5I0M1_RAT	Apolipoprotein H OS=Rattus norvegicus GN=Apoh PE=1 SV=1	RAT	17	0.519996	0.444631	0.529663	0.461318	0.0747979	0.488902
601	26.21	27.63	33.74	22.09	14.69	tr|R9PXT6|R9PXT6_RAT	Focal adhesion kinase 1 OS=Rattus norvegicus GN=Ptk2 PE=1 SV=2	RAT	17	0.691831	0.946237	0.717794	0.972747	0.153835	0.832152
602	26.18	28.37	49.49	46.45	41.18	tr|Q6AXN2|Q6AXN2_RAT	EGF-containing fibulin-like extracellular matrix protein 1 OS=Rattus norvegicus GN=Efemp1 PE=1 SV=1	RAT	22	1.01859	0.855067	1.25893	1.04713	0.137473	1.04493
603	26.18	26.43	33.89	23.95	19.04	sp|O08629|TIF1B_RAT	Transcription intermediary factor 1-beta OS=Rattus norvegicus GN=Trim28 PE=1 SV=2	RAT	16	1.00925	1	0.990832	0.981748	0.0102973	0.995458
604	26.14	26.69	41.68	36.01	31.7	tr|F1M0G3|F1M0G3_RAT	Ectonucleoside triphosphate diphosphohydrolase 1 OS=Rattus norvegicus GN=Entpd1 PE=3 SV=3	RAT	26	1.1272	1.04713	0.990832	0.92045	0.0742083	1.0214
605	26.1	26.71	51.57	42.88	36.04	tr|Q68FZ8|Q68FZ8_RAT	Propionyl coenzyme A carboxylase, beta polypeptide OS=Rattus norvegicus GN=Pccb PE=1 SV=1	RAT	17	1.07647	1.21339	0.879023	0.990832	0.117502	1.03993
606	26.08	33.32	81.44	75.35	64.27	sp|Q91Y81|SEPT2_RAT	Septin-2 OS=Rattus norvegicus GN=Sept2 PE=1 SV=1	RAT	30	0.895365	0.870964	0.83946	0.824138	0.0322212	0.857482
607	26.06	26.21	67.11	54.7	52.01	tr|Q6PCU0|Q6PCU0_RAT	ATP synthase subunit gamma OS=Rattus norvegicus GN=Atp5c1 PE=1 SV=1	RAT	26	0.937562	1.04713	0.847227	0.946237	0.0749482	0.944539
608	26	45.01	55.75	45.11	39.45	tr|E9PT65|E9PT65_RAT	Protein Rdx OS=Rattus norvegicus GN=Rdx PE=1 SV=2	RAT	38	0.824138	0.946237	0.737904	0.847227	0.0884237	0.838877
609	25.99	26.19	38.37	23.02	19.54	tr|A0A0G2K8S6|A0A0G2K8S6_RAT	Glucosidase 1 OS=Rattus norvegicus GN=LOC103692171 PE=1 SV=1	RAT	14	0.972747	0.981748	0.972747	0.981748	0.00460514	0.977248
610	25.97	33.64	25.67	15.53	7.34	tr|F1M0U5|F1M0U5_RAT	Protein Nbas OS=Rattus norvegicus GN=Nbas PE=1 SV=2	RAT	21	0.963829	0.981748	0.972747	0.990832	0.0102973	0.977289
611	25.96	28.89	58.97	46.15	41.6	tr|D3ZAP9|D3ZAP9_RAT	Glycerol-3-phosphate dehydrogenase [NAD(+)] OS=Rattus norvegicus GN=Gpd1l PE=1 SV=1	NAD(+)	18	1.23595	1.19124	0.981748	0.946237	0.116113	1.08879
612	25.9	26.07	25.49	18.08	14.68	tr|B2RYD7|B2RYD7_RAT	Protein Stt3b OS=Rattus norvegicus GN=Stt3b PE=1 SV=1	RAT	14	1.03753	1.03753	0.981748	0.981748	0.027624	1.00964
613	25.89	27.01	73.33	60.78	55.69	sp|Q68FU3|ETFB_RAT	Electron transfer flavoprotein subunit beta OS=Rattus norvegicus GN=Etfb PE=2 SV=3	RAT	13	1.1695	1.35519	1.07647	1.23595	0.0839488	1.20928
614	25.88	26.28	49.15	39.25	29.01	tr|D3ZMY7|D3ZMY7_RAT	Protein Nt5c2 OS=Rattus norvegicus GN=Nt5c2 PE=1 SV=3	RAT	18	0.990832	1	0.963829	0.981748	0.0135817	0.984102
615	25.85	30.35	36.8	25.86	17.92	tr|D3ZZZ9|D3ZZZ9_RAT	Catenin (Cadherin associated protein), delta 1 (Predicted), isoform CRA_a OS=Rattus norvegicus GN=Ctnnd1 PE=1 SV=1	RAT	16	0.954993	0.937562	0.954993	0.946237	0.00762235	0.948446
616	25.75	29.4	56.05	51.92	49.26	sp|B5DEH2|ERLN2_RAT	Erlin-2 OS=Rattus norvegicus GN=Erlin2 PE=1 SV=1	RAT	17	0.879023	0.816582	0.83946	0.772681	0.0465248	0.826936
617	25.71	27.1	28.63	20.37	16.04	tr|D4A857|D4A857_RAT	Importin 9 (Predicted) OS=Rattus norvegicus GN=Ipo9 PE=1 SV=2	RAT	18	0.937562	0.963829	0.981748	1.00925	0.0268505	0.973098
618	25.69	29.78	53.1	40.95	32.62	sp|P13233|CN37_RAT	2',3'-cyclic-nucleotide 3'-phosphodiesterase OS=Rattus norvegicus GN=Cnp PE=1 SV=2	RAT	16	0.903649	0.847227	0.862979	0.816582	0.0365933	0.857609
619	25.64	30.39	52.11	38.12	29.31	sp|Q99N27|SNX1_RAT	Sorting nexin-1 OS=Rattus norvegicus GN=Snx1 PE=1 SV=1	RAT	15	1.02802	1.01859	0.972747	0.963829	0.0280055	0.995796
620	25.62	25.85	81.55	77.18	65.53	tr|F1LP82|F1LP82_RAT	Ras-related protein Rab-2A OS=Rattus norvegicus GN=Rab2a PE=1 SV=3	RAT	19	0.870964	1.18032	0.847227	1.13763	0.149579	1.00903
621	25.6	25.97	32.46	25.07	19.46	tr|Q68HB8|Q68HB8_RAT	Protein Pcdh7 OS=Rattus norvegicus GN=Pcdh7 PE=1 SV=1	RAT	18	0.903649	0.954993	0.972747	1.02802	0.0460454	0.964851
622	25.56	84.01	53.6	46.27	37.26	sp|Q03626|MUG1_RAT	Murinoglobulin-1 OS=Rattus norvegicus GN=Mug1 PE=2 SV=1	RAT	80	0.636796	0.501187	0.642688	0.505825	0.119256	0.571624
623	25.5	25.78	48.44	36.44	30.22	sp|P32577|CSK_RAT	Tyrosine-protein kinase CSK OS=Rattus norvegicus GN=Csk PE=1 SV=1	RAT	15	0.879023	0.928966	0.895365	0.954993	0.0322212	0.914587
624	25.49	25.57	77.62	75.71	61.43	tr|B6DYQ7|B6DYQ7_RAT	Glutathione S-transferase P OS=Rattus norvegicus GN=Gstp1 PE=1 SV=1	RAT	29	1.14815	1.11686	0.887156	0.862979	0.128989	1.00379
625	25.47	32.11	39.51	34.05	22.84	tr|A0A0G2K8K0|A0A0G2K8K0_RAT	Protein Sfpq OS=Rattus norvegicus GN=Sfpq PE=1 SV=1	RAT	19	1.08643	0.801678	1.03753	0.765597	0.152598	0.922807
626	25.46	26.63	86.42	83.54	79.01	tr|M0RD20|M0RD20_RAT	Calpain small subunit 1 OS=Rattus norvegicus GN=Capns1 PE=1 SV=1	RAT	29	1.00925	1.05682	0.895365	0.928966	0.0656445	0.9726
627	25.45	28.33	53.68	42.53	37.68	sp|Q60587|ECHB_RAT	Trifunctional enzyme subunit beta, mitochondrial OS=Rattus norvegicus GN=Hadhb PE=1 SV=1	RAT	23	1.05682	1.05682	0.809096	0.809096	0.132762	0.932957
628	25.43	27.3	69.96	66.43	58.3	sp|Q9R1Z0|VDAC3_RAT	Voltage-dependent anion-selective channel protein 3 OS=Rattus norvegicus GN=Vdac3 PE=1 SV=2	RAT	25	1.02802	0.879023	1.05682	0.903649	0.0793476	0.966876
629	25.43	26.81	32.05	26.2	19.28	tr|Q6IRF5|Q6IRF5_RAT	Phospholipase A2 OS=Rattus norvegicus GN=Pla2g4a PE=1 SV=1	RAT	18	1.15878	1.20226	0.895365	0.937562	0.127569	1.04849
630	25.42	29.83	68.47	56.65	50.49	sp|P62198|PRS8_RAT	26S protease regulatory subunit 8 OS=Rattus norvegicus GN=Psmc5 PE=1 SV=1	RAT	20	0.946237	0.92045	0.972747	0.946237	0.0195378	0.946418
631	25.36	28.19	38.29	29.23	22.05	tr|D3ZRE7|D3ZRE7_RAT	Protein Swap70 OS=Rattus norvegicus GN=Swap70 PE=1 SV=1	RAT	16	1.02802	1.01859	0.972747	0.963829	0.0280055	0.995796
632	25.33	30.22	33.27	21.06	14.86	tr|D4A781|D4A781_RAT	Protein Ipo5 OS=Rattus norvegicus GN=Ipo5 PE=1 SV=1	RAT	17	1.27057	0.751623	1.95884	1.20226	0.333076	1.29583
633	25.33	27.14	41.95	28.79	23.37	tr|Q6GMM8|Q6GMM8_RAT	Long-chain fatty acid transport protein 1 OS=Rattus norvegicus GN=Slc27a1 PE=1 SV=1	RAT	16	0.963829	1	0.928966	0.972747	0.0262656	0.966386
634	25.3	27.92	77.42	66.13	54.84	tr|A0A0G2K0W9|A0A0G2K0W9_RAT	Proteasome subunit alpha type OS=Rattus norvegicus GN=Psma7 PE=1 SV=1	RAT	17	1.04713	1.1695	0.895365	1	0.0957618	1.028
635	25.3	27.37	83.52	77.78	75.86	tr|B0BMW2|B0BMW2_RAT	3-hydroxyacyl-CoA dehydrogenase type-2 OS=Rattus norvegicus GN=Hsd17b10 PE=1 SV=1	RAT	17	0.887156	0.787046	0.765597	0.679204	0.0948917	0.779751
636	25.23	32.94	33.52	23.27	15.67	tr|D4A8H3|D4A8H3_RAT	Protein Uba6 OS=Rattus norvegicus GN=Uba6 PE=1 SV=1	RAT	17	1.00925	1.00925	0.990832	0.990832	0.00921008	1.00004
637	25.22	29	50.93	41.67	33.56	tr|Q5M963|Q5M963_RAT	Cytidine monophosphate N-acetylneuraminic acid synthetase OS=Rattus norvegicus GN=Cmas PE=1 SV=1	RAT	16	1.05682	1.15878	0.816582	0.887156	0.13805	0.979833
638	25.18	27.54	52.79	44.69	38.83	sp|P63086|MK01_RAT	Mitogen-activated protein kinase 1 OS=Rattus norvegicus GN=Mapk1 PE=1 SV=3	RAT	20	1.01859	0.963829	0.972747	0.928966	0.0329153	0.971034
639	25.11	27.37	51.58	44	38.11	sp|Q6Q0N1|CNDP2_RAT	Cytosolic non-specific dipeptidase OS=Rattus norvegicus GN=Cndp2 PE=1 SV=1	RAT	17	1.11686	1.25893	0.972747	1.09648	0.0913735	1.11125
640	25.09	27.22	47.75	36.48	30.94	tr|R9PY09|R9PY09_RAT	Protein kinase C and casein kinase substrate in neurons 2 protein OS=Rattus norvegicus GN=Pacsin2 PE=1 SV=2	RAT	17	0.963829	0.963829	0.794328	0.794328	0.0964082	0.879079
641	25.08	28.49	61.29	51.88	45.97	sp|Q9HB97|PARVA_RAT	Alpha-parvin OS=Rattus norvegicus GN=Parva PE=1 SV=2	RAT	32	0.83946	0.758578	0.77983	0.704693	0.06262	0.77064
642	25.01	33.1	35.67	17.66	11.84	tr|D3ZGS5|D3ZGS5_RAT	Protein Uaca OS=Rattus norvegicus GN=Uaca PE=1 SV=2	RAT	24	1.0666	0.972747	1.09648	1	0.0480522	1.03396
643	24.98	25.25	70.04	60.29	53.43	tr|D4A8F2|D4A8F2_RAT	Protein Rsu1 OS=Rattus norvegicus GN=Rsu1 PE=1 SV=3	RAT	20	0.787046	0.704693	0.787046	0.704693	0.0552058	0.745869
644	24.96	26.73	45.65	34.28	29.13	sp|Q5XIT9|MCCB_RAT	Methylcrotonoyl-CoA carboxylase beta chain, mitochondrial OS=Rattus norvegicus GN=Mccc2 PE=2 SV=1	RAT	15	1.00925	1.04713	0.972747	1.00925	0.02605	1.0096
645	24.87	28.81	35.24	25.7	17.81	tr|D4AB50|D4AB50_RAT	Protein Arhgap10 OS=Rattus norvegicus GN=Arhgap10 PE=4 SV=1	RAT	15	0.981748	1.02802	0.990832	1.03753	0.0234781	1.00953
646	24.84	26.48	30.27	20.24	15.36	tr|A0A0G2JWA3|A0A0G2JWA3_RAT	Protein Xpo7 OS=Rattus norvegicus GN=Xpo7 PE=1 SV=1	RAT	18	1.02802	1.00925	1.10662	1.08643	0.0379605	1.05758
647	24.82	26.54	26.81	18.62	12.16	tr|D4A051|D4A051_RAT	Integrin alpha-7 OS=Rattus norvegicus GN=Itga7 PE=3 SV=2	RAT	19	1.00925	1.00925	1.01859	1.01859	0.00460514	1.01392
648	24.82	24.87	84.35	84.35	81.63	sp|P11517|HBB2_RAT	Hemoglobin subunit beta-2 OS=Rattus norvegicus PE=1 SV=2	RAT	27	5.34564	2.46604	3.49945	1.57036	0.436011	3.22037
649	24.81	25.67	32.2	23.7	19.55	tr|F1LXS3|F1LXS3_RAT	Protein Matn2 OS=Rattus norvegicus GN=Matn2 PE=4 SV=3	RAT	18	0.963829	1.20226	1.08643	1.35519	0.125442	1.15193
650	24.79	27.02	57.68	49.12	37.94	sp|P60123|RUVB1_RAT	RuvB-like 1 OS=Rattus norvegicus GN=Ruvbl1 PE=1 SV=1	RAT	14	0.972747	0.990832	0.937562	0.954993	0.0205937	0.964033
651	24.79	24.96	60.53	50.96	44.5	tr|Q80ZA3|Q80ZA3_RAT	Alpha-2 antiplasmin OS=Rattus norvegicus GN=Serpinf1 PE=1 SV=1	RAT	19	1.07647	1.13763	1.15878	1.22462	0.0460454	1.14937
652	24.75	27.68	68.98	60.65	58.33	sp|P24368|PPIB_RAT	Peptidyl-prolyl cis-trans isomerase B OS=Rattus norvegicus GN=Ppib PE=1 SV=3	RAT	18	0.903649	1.02802	0.60256	0.679204	0.212219	0.803357
653	24.74	25.17	48.28	40.5	36.84	sp|Q68FR6|EF1G_RAT	Elongation factor 1-gamma OS=Rattus norvegicus GN=Eef1g PE=2 SV=3	RAT	16	0.981748	0.981748	0.990832	0.990832	0.00460516	0.98629
654	24.72	27.34	48.2	40.77	37.17	sp|Q66H98|SDPR_RAT	Serum deprivation-response protein OS=Rattus norvegicus GN=Sdpr PE=1 SV=3	RAT	23	1.1695	0.847227	0.928966	0.679204	0.194952	0.906224
655	24.71	24.74	50.22	43.1	41.81	tr|F7EV94|F7EV94_RAT	2-oxoisovalerate dehydrogenase subunit alpha, mitochondrial OS=Rattus norvegicus GN=Bckdha PE=1 SV=1	RAT	15	0.990832	1	0.990832	1	0.00460512	0.995416
656	24.7	27.31	45.69	36.7	27.34	sp|P54001|P4HA1_RAT	Prolyl 4-hydroxylase subunit alpha-1 OS=Rattus norvegicus GN=P4ha1 PE=2 SV=2	RAT	15	1.27057	1.20226	1.43219	1.35519	0.0658889	1.31505
657	24.68	28.72	34.31	24.08	20.64	tr|F1LQN3|F1LQN3_RAT	Reticulon OS=Rattus norvegicus GN=Rtn4 PE=1 SV=1	RAT	26	0.758578	0.937562	0.679204	0.83946	0.119235	0.803701
658	24.61	24.65	53.5	51.47	44.47	tr|A0A0G2K2R5|A0A0G2K2R5_RAT	Protein Efemp2 OS=Rattus norvegicus GN=Efemp2 PE=1 SV=1	RAT	27	0.954993	0.787046	1.10662	0.912011	0.121468	0.940168
659	24.52	28.46	37.13	25.58	17.02	tr|D4A1J6|D4A1J6_RAT	Protein Ankfy1 OS=Rattus norvegicus GN=Ankfy1 PE=1 SV=3	RAT	22	1.02802	1.00925	1.02802	1.01859	0.00762235	1.02097
660	24.51	27.84	30.8	18.26	12.17	tr|F1LP76|F1LP76_RAT	Elongator complex protein 1 OS=Rattus norvegicus GN=Ikbkap PE=1 SV=2	RAT	17	0.903649	1.10662	0.972747	1.19124	0.107538	1.04357
661	24.48	25.95	78.25	75.79	66.67	sp|Q6MG60|DDAH2_RAT	N(G),N(G)-dimethylarginine dimethylaminohydrolase 2 OS=Rattus norvegicus GN=Ddah2 PE=1 SV=1	RAT	21	1.01859	1.05682	0.990832	1.02802	0.0230251	1.02356
662	24.45	28.27	43.5	28.42	18.56	tr|G3V9J7|G3V9J7_RAT	Rab GTPase-binding effector protein 1 OS=Rattus norvegicus GN=Rabep1 PE=1 SV=1	RAT	18	1.03753	1.05682	0.954993	0.981748	0.040774	1.00777
663	24.45	25.91	37.5	26.85	17.76	tr|A0A0G2JSY3|A0A0G2JSY3_RAT	Neurolysin (Metallopeptidase M3 family), isoform CRA_a OS=Rattus norvegicus GN=Nln PE=1 SV=1	RAT	16	1.08643	1.27057	0.855067	1.00925	0.14176	1.05533
664	24.45	24.74	83.4	69.57	54.15	tr|G3V8C4|G3V8C4_RAT	Chloride intracellular channel protein OS=Rattus norvegicus GN=Clic4 PE=1 SV=1	RAT	17	0.963829	0.83946	1.13763	0.990832	0.107838	0.982937
665	24.42	26.84	32.08	25.71	19.87	sp|P08592|A4_RAT	Amyloid beta A4 protein OS=Rattus norvegicus GN=App PE=1 SV=2	RAT	16	0.981748	1.04713	1.0666	1.13763	0.0524984	1.05827
666	24.37	25.32	48.43	38.78	32.08	sp|P52481|CAP2_RAT	Adenylyl cyclase-associated protein 2 OS=Rattus norvegicus GN=Cap2 PE=1 SV=1	RAT	16	1.13763	1.21339	0.972747	1.02802	0.0860615	1.08794
667	24.35	24.84	63.3	50.51	42.76	sp|P09895|RL5_RAT	60S ribosomal protein L5 OS=Rattus norvegicus GN=Rpl5 PE=1 SV=3	RAT	21	1.03753	0.981748	0.937562	0.895365	0.0547673	0.963051
668	24.33	33.97	36.49	22.61	13.8	tr|G3V7I8|G3V7I8_RAT	RCG57812, isoform CRA_b OS=Rattus norvegicus GN=Slk PE=1 SV=1	RAT	18	1.03753	1.07647	1.13763	1.18032	0.0495755	1.10799
669	24.31	26.95	37.54	27.47	24.06	tr|A0A0G2JY12|A0A0G2JY12_RAT	Paxillin OS=Rattus norvegicus GN=Pxn PE=1 SV=1	RAT	15	0.717794	0.737904	0.648634	0.672977	0.0508863	0.694327
670	24.3	32.84	26.93	18.68	13.65	tr|A0A0G2K1Z5|A0A0G2K1Z5_RAT	Aldehyde oxidase 4 OS=Rattus norvegicus GN=Aox3 PE=1 SV=1	RAT	20	1.1272	1.08643	1.83654	1.77011	0.240088	1.45507
671	24.28	30.47	15.44	10.69	6.468	tr|F1LQX7|F1LQX7_RAT	Neurogenic locus notch homolog protein 3 OS=Rattus norvegicus GN=Notch3 PE=4 SV=2	RAT	16	1.18032	1	1.25893	1.0666	0.0888001	1.12646
672	24.28	28	33.04	26.78	15.7	tr|D4AE96|D4AE96_RAT	Importin 7 (Predicted), isoform CRA_c OS=Rattus norvegicus GN=Ipo7 PE=1 SV=1	RAT	17	0.972747	1.00925	0.981748	1.02802	0.0220079	0.997941
673	24.27	27.55	72.78	57.49	52.91	sp|P62142|PP1B_RAT	Serine/threonine-protein phosphatase PP1-beta catalytic subunit OS=Rattus norvegicus GN=Ppp1cb PE=1 SV=3	RAT	25	1.00925	1.05682	0.981748	1.02802	0.0268505	1.01896
674	24.23	33.1	69.16	59.88	50.6	sp|P42123|LDHB_RAT	L-lactate dehydrogenase B chain OS=Rattus norvegicus GN=Ldhb PE=1 SV=2	RAT	26	1.23595	1.18032	0.855067	0.809096	0.186009	1.02011
675	24.23	26.87	38.1	30.11	25.49	tr|Q8R490|Q8R490_RAT	Cadherin 13 OS=Rattus norvegicus GN=Cdh13 PE=1 SV=1	RAT	26	1.34276	1.08643	1.44544	1.15878	0.113505	1.25835
676	24.18	27.2	35.61	28.1	23.19	tr|Q5XIL4|Q5XIL4_RAT	Protein Sorbs3 OS=Rattus norvegicus GN=Sorbs3 PE=1 SV=1	RAT	18	1.28233	1.0666	1.09648	0.92045	0.117973	1.09146
677	24.17	26.26	65.38	53.46	42.69	tr|B0K031|B0K031_RAT	60S ribosomal protein L7 OS=Rattus norvegicus GN=Rpl7 PE=1 SV=1	RAT	17	1.04713	0.972747	1.00925	0.937562	0.0411797	0.991673
678	24.16	26.18	46.72	41.73	38.58	tr|A0A0G2JSP8|A0A0G2JSP8_RAT	Creatine kinase M-type OS=Rattus norvegicus GN=Ckm PE=1 SV=1	RAT	17	0.870964	0.77983	1.5417	1.39316	0.285129	1.14641
679	24.11	28.34	59.45	57.01	55.79	tr|I6L9G5|I6L9G5_RAT	Protein Rcn3 OS=Rattus norvegicus GN=Rcn3 PE=1 SV=1	RAT	28	0.77983	0.83946	0.887156	0.954993	0.0742083	0.86536
680	24.11	26.6	84.97	76.57	67.83	sp|Q3T1K5|CAZA2_RAT	F-actin-capping protein subunit alpha-2 OS=Rattus norvegicus GN=Capza2 PE=1 SV=1	RAT	26	1.00925	1	0.946237	0.946237	0.0301173	0.975432
681	24.09	30.36	52.18	40.87	35.91	sp|Q99ML5|PCYOX_RAT	Prenylcysteine oxidase OS=Rattus norvegicus GN=Pcyox1 PE=1 SV=1	RAT	20	0.912011	1	0.660693	0.711214	0.170174	0.820979
682	24.06	28.85	32.92	19.61	11.25	tr|F1M949|F1M949_RAT	Protein Ckap5 OS=Rattus norvegicus GN=Ckap5 PE=1 SV=3	RAT	20	0.972747	1.01859	0.981748	1.02802	0.0234781	1.00028
683	23.99	25.32	36.35	28.96	24.13	tr|E9PSM5|E9PSM5_RAT	72 kDa type IV collagenase OS=Rattus norvegicus GN=Mmp2 PE=1 SV=3	RAT	16	0.57544	0.660693	0.685488	0.787046	0.111399	0.677167
684	23.99	24.2	71.23	59.26	54.13	sp|Q9QZQ5|NOV_RAT	Protein NOV homolog OS=Rattus norvegicus GN=Nov PE=1 SV=1	RAT	22	1.72187	1.64437	1.87068	1.78649	0.0474	1.75585
685	23.98	30.29	64.35	56.27	50.97	tr|G3V6Q6|G3V6Q6_RAT	Guanine nucleotide binding protein, alpha 11 OS=Rattus norvegicus GN=Gna11 PE=1 SV=1	RAT	22	1.02802	0.981748	1.03753	1	0.0219179	1.01182
686	23.94	24.17	26.54	15.73	8.155	tr|F1M9Q2|F1M9Q2_RAT	ATP-binding cassette sub-family C member 9 OS=Rattus norvegicus GN=Abcc9 PE=1 SV=3	RAT	15	1.1695	0.862979	1	0.737904	0.170256	0.942596
687	23.93	24.24	67.8	56.95	41.36	tr|Q6AZ33|Q6AZ33_RAT	Biliverdin reductase A OS=Rattus norvegicus GN=Blvra PE=1 SV=1	RAT	13	0.660693	0.847227	1.59956	2.05116	0.436444	1.28966
688	23.92	26.64	57.86	49.63	45.14	tr|G3V8Q6|G3V8Q6_RAT	Protein kinase, cAMP-dependent, regulatory, type 2, alpha, isoform CRA_a OS=Rattus norvegicus GN=Prkar2a PE=1 SV=1	RAT	19	1.00925	1.30617	0.816582	1.05682	0.166622	1.04721
689	23.9	25.58	53.77	42.86	29.17	tr|G3V8G2|G3V8G2_RAT	Proteasome (Prosome, macropain) 26S subunit, non-ATPase, 5 (Predicted), isoform CRA_a OS=Rattus norvegicus GN=Psmd5 PE=1 SV=1	RAT	14	1.02802	1.05682	1.02802	1.05682	0.0138146	1.04242
690	23.86	25.28	63.61	54.46	48.02	sp|Q3MIE4|VAT1_RAT	Synaptic vesicle membrane protein VAT-1 homolog OS=Rattus norvegicus GN=Vat1 PE=1 SV=1	RAT	24	1.02802	1.07647	0.698232	0.731139	0.192473	0.883463
691	23.79	24.28	66.83	62.81	55.28	tr|A0A0G2K3Z9|A0A0G2K3Z9_RAT	Uncharacterized protein OS=Rattus norvegicus PE=4 SV=1	RAT	22	0.855067	0.809096	0.862979	0.816582	0.0280055	0.835931
692	23.77	28.42	31.81	21.68	13.28	sp|D3ZBP4|MICA1_RAT	Protein-methionine sulfoxide oxidase MICAL1 OS=Rattus norvegicus GN=Mical1 PE=1 SV=1	RAT	15	0.847227	1.01859	0.963829	1.15878	0.112319	0.997106
693	23.72	24.46	50.44	47.81	37.94	tr|D4AEP0|D4AEP0_RAT	Adenylosuccinate synthetase isozyme 2 OS=Rattus norvegicus GN=Adss PE=1 SV=1	RAT	16	0.990832	1.1695	0.928966	1.09648	0.0888001	1.04644
694	23.7	24.86	42.11	35.66	27.42	tr|F1LPV0|F1LPV0_RAT	Protein Nars OS=Rattus norvegicus GN=Nars PE=1 SV=2	RAT	12	0.990832	1.01859	1	1.02802	0.0145621	1.00936
695	23.69	66.88	68.72	61.3	56.24	sp|P14659|HSP72_RAT	Heat shock-related 70 kDa protein 2 OS=Rattus norvegicus GN=Hspa2 PE=1 SV=2	RAT	77	1.11686	1.05682	1.01859	0.963829	0.0536886	1.03903
696	23.68	26.48	60.7	47.21	41.86	sp|P15650|ACADL_RAT	Long-chain specific acyl-CoA dehydrogenase, mitochondrial OS=Rattus norvegicus GN=Acadl PE=1 SV=1	RAT	27	0.870964	1.00925	0.946237	1.09648	0.0844671	0.980733
697	23.68	23.81	63.13	52.19	47.81	sp|Q62703|RCN2_RAT	Reticulocalbin-2 OS=Rattus norvegicus GN=Rcn2 PE=1 SV=2	RAT	19	0.981748	0.990832	0.981748	0.990832	0.00460516	0.98629
698	23.67	26.03	25.73	17.27	11.73	sp|Q3ZAV8|EDC4_RAT	Enhancer of mRNA-decapping protein 4 OS=Rattus norvegicus GN=Edc4 PE=1 SV=1	RAT	14	0.946237	1	0.963829	1.01859	0.02912	0.982164
699	23.66	29.59	83.73	83.73	83.13	tr|M0RC65|M0RC65_RAT	Cofilin 2, muscle (Predicted), isoform CRA_b OS=Rattus norvegicus GN=Cfl2 PE=1 SV=1	RAT	24	0.666807	1.04713	0.570164	0.895365	0.23589	0.794866
700	23.64	29.8	38.51	27.01	20.3	tr|D4A7R0|D4A7R0_RAT	Signal recognition particle subunit SRP72 OS=Rattus norvegicus GN=Srp72 PE=1 SV=2	RAT	16	1.01859	1	1.01859	1	0.00921009	1.0093
701	23.63	24.69	25.61	20.85	16.83	tr|D3ZEV8|D3ZEV8_RAT	Protein Susd2 OS=Rattus norvegicus GN=Susd2 PE=1 SV=1	RAT	13	0.895365	0.691831	1.01859	0.787046	0.143727	0.848208
702	23.62	29.89	59.04	52.82	42.09	sp|P59215|GNAO_RAT	Guanine nucleotide-binding protein G(o) subunit alpha OS=Rattus norvegicus GN=Gnao1 PE=1 SV=2	RAT	19	1.00925	1	0.972747	0.954993	0.0219179	0.984248
703	23.57	25.85	45.41	35.92	29.59	tr|Q6AZ35|Q6AZ35_RAT	Cytoplasmic dynein 1 intermediate chain 2 OS=Rattus norvegicus GN=Dync1i2 PE=1 SV=1	RAT	16	0.963829	0.981748	0.954993	0.972747	0.0102973	0.968329
704	23.54	24.8	70.46	60.5	49.47	sp|Q68FR9|EF1D_RAT	Elongation factor 1-delta OS=Rattus norvegicus GN=Eef1d PE=1 SV=2	RAT	18	0.990832	0.972747	0.937562	0.92045	0.02912	0.955398
705	23.51	24.39	59.11	44.39	32.71	sp|Q9Z1E1|FLOT1_RAT	Flotillin-1 OS=Rattus norvegicus GN=Flot1 PE=2 SV=2	RAT	12	0.83946	0.862979	0.744732	0.765597	0.0613764	0.803192
706	23.5	24.85	50.69	43.59	32.54	tr|Q5M964|Q5M964_RAT	Fumarate hydratase 1 OS=Rattus norvegicus GN=Fh PE=1 SV=1	RAT	17	1.1695	1.25893	0.928966	0.990832	0.122203	1.08706
707	23.47	23.63	48.74	36.84	31.35	sp|Q5U2Q7|ERF1_RAT	Eukaryotic peptide chain release factor subunit 1 OS=Rattus norvegicus GN=Etf1 PE=2 SV=3	RAT	13	1.22462	1.14815	1.09648	1.00925	0.0699786	1.11963
708	23.38	26.12	34.57	25.98	16.24	tr|D4A4J0|D4A4J0_RAT	Protein Supt16h OS=Rattus norvegicus GN=Supt16h PE=1 SV=1	RAT	17	1.24738	0.963829	1.1695	0.903649	0.132286	1.07109
709	23.37	32.92	89.07	78.54	78.54	sp|P61983|1433G_RAT	14-3-3 protein gamma OS=Rattus norvegicus GN=Ywhag PE=1 SV=2	RAT	34	1.05682	1.21339	0.903649	1.03753	0.104353	1.05285
710	23.37	23.56	39.93	31.72	27.24	sp|Q9WUD9|SRC_RAT	Proto-oncogene tyrosine-protein kinase Src OS=Rattus norvegicus GN=Src PE=1 SV=4	RAT	14	1.00925	0.946237	1.02802	0.954993	0.0353321	0.984625
711	23.36	24.3	38.37	24.73	15.78	tr|A0A0G2K3V7|A0A0G2K3V7_RAT	DNA topoisomerase 1 OS=Rattus norvegicus GN=Top1 PE=1 SV=1	RAT	13	0.963829	1.00925	0.981748	1.01859	0.0219179	0.993355
712	23.32	24.15	46.19	37.69	31.59	sp|Q63083|NUCB1_RAT	Nucleobindin-1 OS=Rattus norvegicus GN=Nucb1 PE=1 SV=1	RAT	14	0.990832	1.08643	0.946237	1.03753	0.0514674	1.01526
713	23.29	29.46	40.7	32.17	23.89	tr|F1LUV9|F1LUV9_RAT	Neural cell adhesion molecule 1 OS=Rattus norvegicus GN=Ncam1 PE=1 SV=3	RAT	21	1.03753	0.862979	0.772681	0.642688	0.173268	0.828969
714	23.29	24.92	62.17	57.52	50.44	tr|R9PXU0|R9PXU0_RAT	Lamina-associated polypeptide 2, isoform beta OS=Rattus norvegicus GN=Tmpo PE=1 SV=2	RAT	21	0.954993	0.824138	0.824138	0.711214	0.104156	0.828621
715	23.27	23.77	51.08	39.39	29.87	sp|P16296|FA9_RAT	Coagulation factor IX OS=Rattus norvegicus GN=F9 PE=2 SV=2	RAT	18	0.903649	0.691831	0.954993	0.724436	0.13761	0.818727
716	23.26	23.61	32.04	19.6	13.1	tr|D3ZSA9|D3ZSA9_RAT	Protein Nomo1 OS=Rattus norvegicus GN=Nomo1 PE=1 SV=1	RAT	14	0.895365	1.01859	0.92045	1.03753	0.0631162	0.967984
717	23.24	23.38	68.23	60.65	49.82	tr|F1M978|F1M978_RAT	Inositol monophosphatase 1 OS=Rattus norvegicus GN=Impa1 PE=1 SV=1	RAT	13	1.07647	1.03753	1.07647	1.04713	0.0164269	1.0594
718	23.23	24.92	45.06	38.19	30.32	sp|P41499|PTN11_RAT	Tyrosine-protein phosphatase non-receptor type 11 OS=Rattus norvegicus GN=Ptpn11 PE=1 SV=4	RAT	19	1.02802	1.01859	0.990832	0.981748	0.0189858	1.0048
719	23.19	23.29	44.49	33.84	30.8	tr|Q5U2U3|Q5U2U3_RAT	Poly [ADP-ribose] polymerase OS=Rattus norvegicus GN=Parp3 PE=1 SV=1	ADP-ribose	16	0.972747	0.954993	0.972747	0.963829	0.00762233	0.966079
720	23.18	25.3	71.1	68.81	65.14	tr|F1LNY0|F1LNY0_RAT	Hypoxanthine-guanine phosphoribosyltransferase OS=Rattus norvegicus GN=Hprt1 PE=1 SV=3	RAT	18	1.03753	1.14815	0.824138	0.92045	0.124021	0.982567
721	23.17	24.52	41.6	34.13	22.24	tr|Q68FT7|Q68FT7_RAT	Phenylalanyl-tRNA synthetase, beta subunit OS=Rattus norvegicus GN=Farsb PE=1 SV=1	RAT	14	0.946237	0.990832	0.972747	1.00925	0.0237473	0.979767
722	23.13	26.32	26.92	17.39	12.73	tr|D4A5F1|D4A5F1_RAT	Protein Pkd2 OS=Rattus norvegicus GN=Pkd2 PE=1 SV=1	RAT	13	1.1272	1.20226	1.19124	1.28233	0.0459141	1.20076
723	23.1	23.36	59.45	54.72	50.79	tr|Q5U1W6|Q5U1W6_RAT	Apolipoprotein O-like OS=Rattus norvegicus GN=Apool PE=1 SV=1	RAT	13	0.824138	1.04713	0.765597	0.963829	0.12363	0.900173
724	23.08	23.78	40.03	26.64	20.82	sp|P24155|THOP1_RAT	Thimet oligopeptidase OS=Rattus norvegicus GN=Thop1 PE=1 SV=4	RAT	14	1.05682	1.00925	0.981748	0.946237	0.04046	0.998514
725	23.03	25.49	40.98	33.56	22.77	tr|Q99PV2|Q99PV2_RAT	Protein Stxbp3 OS=Rattus norvegicus GN=Stxbp3 PE=1 SV=1	RAT	12	0.937562	0.912011	0.787046	0.765597	0.0883704	0.850554
726	23.02	29.6	39.88	31.35	27.98	tr|Q642E3|Q642E3_RAT	CDK5 regulatory subunit associated protein 3, isoform CRA_b OS=Rattus norvegicus GN=Cdk5rap3 PE=1 SV=1	RAT	17	0.946237	1.48594	0.954993	1.52757	0.226645	1.22868
727	23.01	29.07	55.71	45.69	29.06	sp|O89049|TRXR1_RAT	Thioredoxin reductase 1, cytoplasmic OS=Rattus norvegicus GN=Txnrd1 PE=1 SV=5	RAT	15	0.862979	0.937562	0.855067	0.92045	0.0398436	0.894014
728	22.95	24.7	33.07	25.39	21	tr|Q5FVS2|Q5FVS2_RAT	Kallikrein B, plasma 1 OS=Rattus norvegicus GN=Klkb1 PE=1 SV=1	RAT	14	0.660693	0.559758	0.862979	0.724436	0.156632	0.701966
729	22.91	27.63	45.68	39.79	33.68	sp|Q9ER24|ATX10_RAT	Ataxin-10 OS=Rattus norvegicus GN=Atxn10 PE=1 SV=1	RAT	19	1	1.01859	0.963829	0.981748	0.0205937	0.991042
730	22.91	24.11	33.25	22.49	18.82	tr|A0A0G2JSR7|A0A0G2JSR7_RAT	Matrin-3 OS=Rattus norvegicus GN=Matr3 PE=1 SV=1	RAT	15	1.07647	0.870964	1.14815	0.928966	0.110388	1.00614
731	22.88	25.72	58.67	48.71	42.44	sp|P16446|PIPNA_RAT	Phosphatidylinositol transfer protein alpha isoform OS=Rattus norvegicus GN=Pitpna PE=1 SV=2	RAT	15	1.09648	0.972747	1.13763	1.00925	0.0625779	1.05403
732	22.87	28.39	62.22	58.1	48.89	tr|Q4G079|Q4G079_RAT	Protein Aimp1 OS=Rattus norvegicus GN=Aimp1 PE=1 SV=1	RAT	18	0.972747	1.00925	0.92045	0.954993	0.0332053	0.964361
733	22.86	23.96	88.31	88.31	87.66	sp|Q3T1J1|IF5A1_RAT	Eukaryotic translation initiation factor 5A-1 OS=Rattus norvegicus GN=Eif5a PE=1 SV=3	RAT	14	1.05682	1.22462	0.879023	1.02802	0.117178	1.04712
734	22.86	23.06	36.12	27.17	19.53	tr|D3ZM57|D3ZM57_RAT	Golgi integral membrane protein 4 OS=Rattus norvegicus GN=Golim4 PE=1 SV=3	RAT	11	0.83946	0.937562	0.847227	0.946237	0.0553982	0.892622
735	22.84	26.71	25.63	16.18	14.29	tr|A0A0A0MY07|A0A0A0MY07_RAT	Ubiquitin carboxyl-terminal hydrolase 15 OS=Rattus norvegicus GN=Usp15 PE=1 SV=1	RAT	16	0.946237	0.981748	0.946237	0.981748	0.0184186	0.963993
736	22.83	25.9	26.42	14.7	8.084	tr|D3ZCG3|D3ZCG3_RAT	Protein Mon2 OS=Rattus norvegicus GN=Mon2 PE=1 SV=3	RAT	18	0.990832	0.972747	1.0666	1.03753	0.0365441	1.01693
737	22.77	25.19	80.98	77.17	74.46	sp|Q62636|RAP1B_RAT	Ras-related protein Rap-1b OS=Rattus norvegicus GN=Rap1b PE=1 SV=2	RAT	23	1	1.1272	0.751623	0.862979	0.15116	0.93545
738	22.77	24.89	22.28	17.85	13.84	tr|G3V6X1|G3V6X1_RAT	Fibulin 2, isoform CRA_a OS=Rattus norvegicus GN=Fbln2 PE=1 SV=1	RAT	14	1.21339	1.22462	1.11686	1.11686	0.0438584	1.16793
739	22.77	23.41	37.22	29.87	22.68	tr|A0A0G2K135|A0A0G2K135_RAT	Complement factor I OS=Rattus norvegicus GN=Cfi PE=1 SV=1	RAT	16	0.816582	0.60256	0.772681	0.570164	0.153377	0.690497
740	22.73	27.27	45.89	33.47	25.45	sp|P53042|PPP5_RAT	Serine/threonine-protein phosphatase 5 OS=Rattus norvegicus GN=Ppp5c PE=1 SV=1	RAT	13	0.972747	1.11686	0.963829	1.09648	0.0671214	1.03748
741	22.71	25.31	65.42	60.34	58.98	sp|P81155|VDAC2_RAT	Voltage-dependent anion-selective channel protein 2 OS=Rattus norvegicus GN=Vdac2 PE=1 SV=2	RAT	22	0.990832	0.963829	0.972747	0.946237	0.0166038	0.968411
742	22.7	22.99	59.32	51.86	44.75	sp|P54921|SNAA_RAT	Alpha-soluble NSF attachment protein OS=Rattus norvegicus GN=Napa PE=1 SV=2	RAT	13	1.10662	0.895365	1.10662	0.903649	0.103283	1.00307
743	22.67	24.92	60.66	55.51	51.84	sp|P67779|PHB_RAT	Prohibitin OS=Rattus norvegicus GN=Phb PE=1 SV=1	RAT	15	0.972747	1.04713	0.946237	1.00925	0.0382757	0.993841
744	22.67	22.92	53.78	39.74	30.02	tr|G3V8T5|G3V8T5_RAT	Protein Ruvbl2 OS=Rattus norvegicus GN=Ruvbl2 PE=1 SV=1	RAT	14	0.990832	1	0.972747	0.972747	0.0119795	0.984082
745	22.66	23.03	50	42.16	37.57	sp|O35987|NSF1C_RAT	NSFL1 cofactor p47 OS=Rattus norvegicus GN=Nsfl1c PE=1 SV=1	RAT	15	0.954993	0.831764	1.0666	0.928966	0.0884237	0.94558
746	22.64	25.4	43.42	32.02	26.33	sp|P40615|DKC1_RAT	H/ACA ribonucleoprotein complex subunit 4 OS=Rattus norvegicus GN=Dkc1 PE=1 SV=4	RAT	15	1	0.928966	0.981748	0.912011	0.0379605	0.955681
747	22.63	28.09	31.18	19.05	13.02	sp|O35821|MBB1A_RAT	Myb-binding protein 1A OS=Rattus norvegicus GN=Mybbp1a PE=1 SV=2	RAT	20	0.963829	0.660693	1.1272	0.711214	0.21909	0.865733
748	22.62	22.88	52.41	45.48	34.34	sp|Q63525|NUDC_RAT	Nuclear migration protein nudC OS=Rattus norvegicus GN=Nudc PE=1 SV=1	RAT	11	1.1272	0.990832	0.963829	0.847227	0.101363	0.982271
749	22.61	27.79	57.57	49.26	39.17	sp|Q9EQS0|TALDO_RAT	Transaldolase OS=Rattus norvegicus GN=Taldo1 PE=1 SV=2	RAT	17	1.0666	1.04713	0.847227	0.824138	0.117412	0.946273
750	22.61	22.84	33.43	24.1	21.81	tr|D3ZY02|D3ZY02_RAT	Protein Athl1 OS=Rattus norvegicus GN=Athl1 PE=1 SV=3	RAT	16	0.77983	0.912011	0.801678	0.946237	0.0821671	0.859939
751	22.58	25.4	35.08	26.93	20.44	sp|P70531|EF2K_RAT	Eukaryotic elongation factor 2 kinase OS=Rattus norvegicus GN=Eef2k PE=1 SV=1	RAT	14	0.862979	1.02802	0.887156	1.05682	0.0883704	0.958742
752	22.58	22.76	28.95	25.99	22.53	tr|Q5FWS5|Q5FWS5_RAT	Lysyl oxidase-like 1 OS=Rattus norvegicus GN=Loxl1 PE=2 SV=1	RAT	14	0.824138	0.946237	0.737904	0.83946	0.0884586	0.836935
753	22.56	22.84	47.05	38.4	28.48	sp|P46413|GSHB_RAT	Glutathione synthetase OS=Rattus norvegicus GN=Gss PE=1 SV=1	RAT	12	1.02802	1.09648	1.02802	1.08643	0.0301173	1.05973
754	22.54	23	22.11	12.91	9.011	tr|D3ZDA6|D3ZDA6_RAT	Protein Sdk2 OS=Rattus norvegicus GN=Sdk2 PE=1 SV=1	RAT	14	1.00925	1.04713	0.990832	1.02802	0.0205937	1.01881
755	22.54	22.6	93.96	91.28	91.28	sp|P62161|CALM_RAT	Calmodulin OS=Rattus norvegicus GN=Calm1 PE=1 SV=2	RAT	30	0.77983	1.10662	0.630957	0.895365	0.203664	0.853194
756	22.53	23.14	47.37	36.45	24.56	tr|G3V702|G3V702_RAT	Smu-1 suppressor of mec-8 and unc-52 homolog (C. elegans) OS=Rattus norvegicus GN=Smu1 PE=1 SV=1	RAT	16	0.981748	0.972747	0.963829	0.954993	0.0102973	0.968329
757	22.52	26.13	30.73	22.33	16.93	tr|G3V7V8|G3V7V8_RAT	Phosphodiesterase 5A, cGMP-specific, isoform CRA_c OS=Rattus norvegicus GN=Pde5a PE=1 SV=1	RAT	15	1.0666	1.33045	1.36773	1.69044	0.162373	1.36381
758	22.52	24.64	85.71	82.54	65.87	tr|G3V8B3|G3V8B3_RAT	Histone H2B OS=Rattus norvegicus GN=Hist1h2bq PE=3 SV=1	RAT	71	0.816582	1.08643	0.685488	0.912011	0.166964	0.875127
759	22.49	23.12	55.37	40.42	29.47	tr|Q4V8H5|Q4V8H5_RAT	Aspartyl aminopeptidase OS=Rattus norvegicus GN=Dnpep PE=1 SV=1	RAT	17	0.954993	0.972747	0.963829	0.990832	0.0136623	0.9706
760	22.48	25.09	39.73	27.33	23.09	sp|P55314|CO8B_RAT	Complement component C8 beta chain OS=Rattus norvegicus GN=C8b PE=2 SV=2	RAT	16	0.496592	0.334195	0.717794	0.47863	0.270561	0.506803
761	22.47	27.76	71.43	59.85	57.53	sp|P04639|APOA1_RAT	Apolipoprotein A-I OS=Rattus norvegicus GN=Apoa1 PE=1 SV=2	RAT	20	0.758578	0.758578	0.824138	0.816582	0.0392753	0.789469
762	22.45	25.02	32.64	22.59	14.7	tr|B5DFK6|B5DFK6_RAT	Adaptor-related protein complex 3, delta 1 subunit, isoform CRA_b OS=Rattus norvegicus GN=Ap3d1 PE=1 SV=1	RAT	15	0.855067	0.946237	0.870964	0.963829	0.0514469	0.909024
763	22.44	28.1	68.5	63	63	tr|Q5RKJ9|Q5RKJ9_RAT	RAB10, member RAS oncogene family OS=Rattus norvegicus GN=Rab10 PE=1 SV=1	RAT	18	1.09648	1.10662	0.879023	0.895365	0.108002	0.994372
764	22.42	25.58	28.67	20.6	14.33	tr|F1M8K0|F1M8K0_RAT	Protein Dag1 OS=Rattus norvegicus GN=Dag1 PE=1 SV=1	RAT	15	0.912011	0.666807	0.809096	0.586138	0.169251	0.743513
765	22.37	25.51	36.73	25.41	20.47	tr|F1LM66|F1LM66_RAT	Protein Eftud2 OS=Rattus norvegicus GN=Eftud2 PE=1 SV=1	RAT	16	0.981748	1.01859	0.963829	1	0.0205937	0.991042
766	22.36	24.42	75.59	73.23	68.5	sp|P25113|PGAM1_RAT	Phosphoglycerate mutase 1 OS=Rattus norvegicus GN=Pgam1 PE=1 SV=4	RAT	26	1.19124	1.00925	0.928966	0.77983	0.151871	0.977323
767	22.34	22.52	45.33	38.33	29.18	sp|E9PU28|IMDH2_RAT	Inosine-5'-monophosphate dehydrogenase 2 OS=Rattus norvegicus GN=Impdh2 PE=1 SV=1	RAT	13	1.00925	0.937562	1.03753	0.963829	0.039334	0.987043
768	22.33	22.41	49.88	35.93	33.81	tr|A0A0G2KAM3|A0A0G2KAM3_RAT	Pyruvate dehydrogenase E1 component subunit beta, mitochondrial OS=Rattus norvegicus GN=Pdhb PE=1 SV=1	RAT	17	1.00925	1.30617	0.801678	1.03753	0.172623	1.03866
769	22.26	27.06	42.95	27.93	17.13	tr|B2RYJ3|B2RYJ3_RAT	Protein Cul4a OS=Rattus norvegicus GN=Cul4a PE=1 SV=1	RAT	15	1.01859	1.00925	0.990832	0.990832	0.0119794	1.00238
770	22.26	22.41	41.46	34.35	33.54	tr|A0A0G2JWK2|A0A0G2JWK2_RAT	Methyl-CpG-binding protein 2 OS=Rattus norvegicus GN=Mecp2 PE=1 SV=1	RAT	21	1.04713	0.787046	0.903649	0.672977	0.162722	0.8527
771	22.24	24.6	65.17	55.52	46.21	tr|A0A0H2UHX3|A0A0H2UHX3_RAT	40S ribosomal protein S4 OS=Rattus norvegicus GN=Rps4x PE=1 SV=1	RAT	17	0.963829	1	0.928966	0.954993	0.0264407	0.961947
772	22.22	24.31	59.57	53.07	45.85	tr|B2GV72|B2GV72_RAT	Carbonyl reductase 3 OS=Rattus norvegicus GN=Cbr3 PE=1 SV=1	RAT	18	1.0666	1.09648	0.937562	0.963829	0.0658546	1.01612
773	22.21	26.64	55.14	47.43	38.57	sp|Q5RJR2|TWF1_RAT	Twinfilin-1 OS=Rattus norvegicus GN=Twf1 PE=1 SV=1	RAT	18	1.01859	0.972747	1.00925	0.963829	0.0234781	0.991105
774	22.21	24	26.66	18.67	14.34	tr|Q5M9I2|Q5M9I2_RAT	Alpha-mannosidase OS=Rattus norvegicus GN=Man2c1 PE=1 SV=1	RAT	16	1.00925	1.23595	0.870964	1.07647	0.125285	1.04816
775	22.15	51.88	45.31	37.3	32.67	sp|P52303|AP1B1_RAT	AP-1 complex subunit beta-1 OS=Rattus norvegicus GN=Ap1b1 PE=1 SV=1	RAT	35	1	1.01859	0.954993	0.972747	0.0247966	0.986583
776	22.14	23.42	41.94	30.29	25.83	tr|A0A0G2K9Y5|A0A0G2K9Y5_RAT	Histidine-rich glycoprotein OS=Rattus norvegicus GN=Hrg PE=1 SV=1	RAT	16	0.654636	0.613762	0.474242	0.436516	0.168042	0.544789
777	22.13	22.46	51.91	45.9	39.07	sp|Q99NA5|IDH3A_RAT	Isocitrate dehydrogenase [NAD] subunit alpha, mitochondrial OS=Rattus norvegicus GN=Idh3a PE=1 SV=1	RAT	16	1.00925	1.09648	0.963829	1.04713	0.0474	1.02917
778	22.12	25.34	44.32	29.75	21.27	tr|D3ZGL0|D3ZGL0_RAT	GRIP1 associated protein 1, isoform CRA_b OS=Rattus norvegicus GN=Gripap1 PE=1 SV=3	RAT	19	0.990832	0.981748	1.02802	1.01859	0.0189858	1.0048
779	22.12	22.69	41.28	31.57	28.26	tr|D4AE17|D4AE17_RAT	Protein Zak OS=Rattus norvegicus GN=Zak PE=1 SV=1	RAT	13	1.00925	1.02802	0.990832	1	0.0136623	1.00703
780	22.11	24.14	44.97	33.78	24.29	tr|D3ZUC9|D3ZUC9_RAT	Oxidative-stress responsive 1 (Predicted) OS=Rattus norvegicus GN=Oxsr1 PE=1 SV=1	RAT	13	0.981748	1.00925	0.954993	0.990832	0.0198761	0.984206
781	22.08	22.83	44.32	31.33	18.47	tr|D4A739|D4A739_RAT	Catenin (Cadherin associated protein), alpha-like 1 (Predicted) OS=Rattus norvegicus GN=Ctnnal1 PE=1 SV=1	RAT	14	0.946237	0.990832	0.972747	1.00925	0.0237473	0.979767
782	22.04	26.26	28.73	21.47	14.91	tr|A0A0G2JUM2|A0A0G2JUM2_RAT	Protein LOC361635 OS=Rattus norvegicus GN=LOC361635 PE=1 SV=1	RAT	20	0.92045	1.02802	0.937562	1.04713	0.0559712	0.983289
783	22	22.25	55.28	47.78	38.61	sp|Q5HZV9|PP1R7_RAT	Protein phosphatase 1 regulatory subunit 7 OS=Rattus norvegicus GN=Ppp1r7 PE=1 SV=1	RAT	13	1.15878	1.27057	1.01859	1.11686	0.0791943	1.1412
784	21.97	47.79	53.16	41.54	35.56	tr|A0A0G2K890|A0A0G2K890_RAT	Ezrin OS=Rattus norvegicus GN=Ezr PE=1 SV=1	RAT	33	0.751623	1.31826	0.698232	1.21339	0.2749	0.995375
785	21.97	22.53	40.98	29.11	22.6	sp|Q499N5|ACSF2_RAT	Acyl-CoA synthetase family member 2, mitochondrial OS=Rattus norvegicus GN=Acsf2 PE=2 SV=1	RAT	14	0.972747	1.03753	0.990832	1.04713	0.0307522	1.01206
786	21.94	33.34	24.62	12.93	6.449	tr|F1LZV1|F1LZV1_RAT	Kalirin OS=Rattus norvegicus GN=Kalrn PE=1 SV=3	RAT	26	0.937562	0.870964	1	0.937562	0.0487262	0.936522
787	21.93	23.53	34.62	22.84	17.83	tr|D3ZVQ0|D3ZVQ0_RAT	Protein LOC100911959 OS=Rattus norvegicus GN=Usp5 PE=1 SV=1	RAT	16	1	1.11686	1.1272	1.24738	0.0779647	1.12286
788	21.89	22.04	37.18	28.06	18.93	tr|Q5U2V1|Q5U2V1_RAT	FK506 binding protein 10 OS=Rattus norvegicus GN=Fkbp10 PE=1 SV=1	RAT	16	1.00925	1.36773	0.912011	1.22462	0.158255	1.1284
789	21.88	25.38	60	52.08	43.77	tr|F1M013|F1M013_RAT	Protein LOC100910109 OS=Rattus norvegicus GN=Rpl7a PE=4 SV=2	RAT	18	1.09648	1.04713	0.963829	0.92045	0.0683915	1.00697
790	21.86	22.01	80.95	77.78	64.02	sp|O88767|PARK7_RAT	Protein deglycase DJ-1 OS=Rattus norvegicus GN=Park7 PE=1 SV=1	RAT	15	1.25893	1.30617	0.83946	0.879023	0.198686	1.07089
791	21.83	25.84	37.06	32.05	23.54	tr|D3ZD23|D3ZD23_RAT	ATP-binding cassette, sub-family E (OABP), member 1 OS=Rattus norvegicus GN=Abce1 PE=1 SV=1	RAT	16	0.963829	1.0666	0.903649	0.990832	0.0596456	0.981227
792	21.82	21.84	60.98	56.1	50.41	sp|P60901|PSA6_RAT	Proteasome subunit alpha type-6 OS=Rattus norvegicus GN=Psma6 PE=1 SV=1	RAT	14	1.04713	1.08643	0.990832	1.03753	0.0326944	1.04048
793	21.75	23.07	57.33	44.47	31.11	tr|Q6PCT9|Q6PCT9_RAT	Proteasome (Prosome, macropain) 26S subunit, non-ATPase, 6 OS=Rattus norvegicus GN=Psmd6 PE=1 SV=1	RAT	15	1.10662	1.05682	0.847227	0.809096	0.134778	0.954941
794	21.73	22.01	28.25	20.57	14.54	tr|A0A0G2K7X7|A0A0G2K7X7_RAT	Oxidation resistance protein 1 OS=Rattus norvegicus GN=C7 PE=1 SV=1	RAT	15	0.534564	0.487529	0.636796	0.580764	0.0987468	0.559913
795	21.72	22.82	47.94	33.4	28.29	sp|Q6P6R2|DLDH_RAT	Dihydrolipoyl dehydrogenase, mitochondrial OS=Rattus norvegicus GN=Dld PE=1 SV=1	RAT	17	1.11686	1.27057	0.981748	1.13763	0.0908673	1.1267
796	21.72	22.69	63.6	54.81	49.37	sp|Q4FZY0|EFHD2_RAT	EF-hand domain-containing protein D2 OS=Rattus norvegicus GN=Efhd2 PE=1 SV=1	RAT	17	0.831764	0.801678	0.855067	0.831764	0.0228316	0.830068
797	21.72	21.97	43.22	27.67	21.7	sp|Q6P747|HP1B3_RAT	Heterochromatin protein 1-binding protein 3 OS=Rattus norvegicus GN=Hp1bp3 PE=1 SV=1	RAT	12	0.895365	0.787046	0.847227	0.737904	0.0729586	0.816886
798	21.68	23.02	41.67	30.56	23.53	sp|Q9JM53|AIFM1_RAT	Apoptosis-inducing factor 1, mitochondrial OS=Rattus norvegicus GN=Aifm1 PE=1 SV=1	RAT	14	1	1.01859	0.972747	0.990832	0.0166038	0.995543
799	21.67	22.12	94.29	93.57	90	sp|P62963|PROF1_RAT	Profilin-1 OS=Rattus norvegicus GN=Pfn1 PE=1 SV=2	RAT	36	0.981748	1.47231	0.642688	0.954993	0.293043	1.01294
800	21.66	25.16	52.72	42.98	35.82	sp|Q6AXQ0|SAE1_RAT	SUMO-activating enzyme subunit 1 OS=Rattus norvegicus GN=Sae1 PE=2 SV=1	RAT	14	0.862979	1.03753	0.758578	0.92045	0.112579	0.894884
801	21.58	28.86	33.27	19.77	10.34	tr|A0A0G2JVT8|A0A0G2JVT8_RAT	Protein LOC500013 OS=Rattus norvegicus GN=LOC500013 PE=1 SV=1	RAT	19	1.31826	1.05682	1.11686	0.895365	0.137984	1.09683
802	21.58	23.27	52.25	43.82	33.15	tr|G3V741|G3V741_RAT	Phosphate carrier protein, mitochondrial OS=Rattus norvegicus GN=Slc25a3 PE=1 SV=1	RAT	16	0.928966	0.870964	0.928966	0.870964	0.032225	0.899965
803	21.55	26.99	23.42	13.84	8.766	tr|E9PTG1|E9PTG1_RAT	Protein Smarca2 OS=Rattus norvegicus GN=Smarca2 PE=1 SV=1	RAT	15	1.0666	0.903649	1.13763	0.963829	0.0888001	1.01793
804	21.55	21.77	20.33	15.45	11.26	sp|Q6MG49|BAG6_RAT	Large proline-rich protein BAG6 OS=Rattus norvegicus GN=Bag6 PE=1 SV=2	RAT	11	1.03753	0.963829	1.0666	0.990832	0.039334	1.0147
805	21.54	24.64	44.55	35.95	27.72	tr|G3V7G0|G3V7G0_RAT	Cytoplasmic dynein 1 light intermediate chain 1 OS=Rattus norvegicus GN=Dync1li1 PE=1 SV=1	RAT	15	0.972747	0.963829	0.928966	0.928966	0.0209904	0.948627
806	21.54	23.14	46.65	44.09	38.02	tr|Q4KM57|Q4KM57_RAT	LEM domain containing 2 OS=Rattus norvegicus GN=Lemd2 PE=1 SV=1	RAT	14	0.990832	1.00925	0.954993	0.972747	0.0205937	0.981956
807	21.53	38.53	96.79	85.32	75.69	sp|P08009|GSTM4_RAT	Glutathione S-transferase Yb-3 OS=Rattus norvegicus GN=Gstm3 PE=1 SV=2	RAT	44	0.92045	0.787046	1.11686	0.928966	0.125158	0.938331
808	21.52	25.83	43.6	39.16	34.24	tr|Q5VLR5|Q5VLR5_RAT	BWK4 OS=Rattus norvegicus GN=Erp44 PE=1 SV=1	RAT	17	1.02802	1.01859	0.990832	0.981748	0.0189858	1.0048
809	21.51	21.86	35.98	29.67	28.05	sp|Q5I0D7|PEPD_RAT	Xaa-Pro dipeptidase OS=Rattus norvegicus GN=Pepd PE=2 SV=1	RAT	13	0.972747	1.28233	0.83946	1.10662	0.156071	1.05029
810	21.5	24.21	63.17	60.63	45.08	tr|G3V6S3|G3V6S3_RAT	Calumenin OS=Rattus norvegicus GN=Calu PE=1 SV=1	RAT	20	0.990832	0.981748	1.01859	1.01859	0.0164269	1.00244
811	21.48	48.09	35.45	28.46	23.85	sp|P11505|AT2B1_RAT	Plasma membrane calcium-transporting ATPase 1 OS=Rattus norvegicus GN=Atp2b1 PE=1 SV=2	RAT	33	1.04713	1.03753	0.990832	0.972747	0.0307522	1.01206
812	21.47	23.82	42.8	34.08	27.38	sp|Q64611|CSAD_RAT	Cysteine sulfinic acid decarboxylase OS=Rattus norvegicus GN=Csad PE=1 SV=1	RAT	16	0.963829	0.946237	0.963829	0.954993	0.00762236	0.957222
813	21.45	22.68	43.34	36.4	28.14	tr|D3ZLA3|D3ZLA3_RAT	Copine 3 protein OS=Rattus norvegicus GN=Cpne3 PE=1 SV=1	RAT	19	1.00925	0.855067	1.00925	0.862979	0.0804669	0.934138
814	21.39	21.48	61.44	57.05	52.98	sp|Q811X6|CRYL1_RAT	Lambda-crystallin homolog OS=Rattus norvegicus GN=Cryl1 PE=1 SV=3	RAT	12	1.20226	1.19124	0.928966	0.928966	0.126028	1.06286
815	21.38	30.44	65.23	52.79	46.45	sp|P63095|GNAS2_RAT	Guanine nucleotide-binding protein G(s) subunit alpha isoforms short OS=Rattus norvegicus GN=Gnas PE=1 SV=1	RAT	20	1.02802	1.03753	1	1.00925	0.0145621	1.0187
816	21.37	21.47	37.72	22.63	20	sp|Q66H94|FKBP9_RAT	Peptidyl-prolyl cis-trans isomerase FKBP9 OS=Rattus norvegicus GN=Fkbp9 PE=2 SV=1	RAT	15	0.717794	0.903649	0.648634	0.809096	0.124678	0.769794
817	21.36	26.7	32.28	25.52	18.54	tr|A0A0G2K1M2|A0A0G2K1M2_RAT	Disks large homolog 1 OS=Rattus norvegicus GN=Dlg1 PE=1 SV=1	RAT	18	0.928966	0.946237	0.912011	0.928966	0.0130253	0.929045
818	21.34	23.86	75.4	67.38	62.57	tr|A0A0G2K9H8|A0A0G2K9H8_RAT	ADP-ribosylation factor 3 OS=Rattus norvegicus GN=Arf3 PE=4 SV=1	RAT	34	0.990832	1.01859	1.00925	1.02802	0.0135817	1.01167
819	21.33	21.48	42.88	30.87	24.87	sp|O35112|CD166_RAT	CD166 antigen OS=Rattus norvegicus GN=Alcam PE=1 SV=1	RAT	13	0.990832	0.990832	0.765597	0.765597	0.128235	0.878214
820	21.31	25.55	29.78	20.26	15.51	tr|D4A510|D4A510_RAT	Protein Smarcc2 OS=Rattus norvegicus GN=Smarcc2 PE=1 SV=3	RAT	15	1.05682	0.879023	1.1272	0.937562	0.0973782	1.00015
821	21.29	27	55.93	45.34	36.44	tr|A0A0G2JU42|A0A0G2JU42_RAT	Protein Eif2s3y OS=Rattus norvegicus GN=Eif2s3y PE=1 SV=1	RAT	20	0.963829	0.990832	1.02802	1.05682	0.0350642	1.00987
822	21.29	22.92	65.99	60.71	45.09	tr|G3V9U2|G3V9U2_RAT	3-ketoacyl-CoA thiolase, mitochondrial OS=Rattus norvegicus GN=Acaa2 PE=1 SV=3	RAT	14	1.13763	1.51356	1.00925	1.35519	0.154979	1.25391
823	21.28	22.19	66.09	49.13	37.72	tr|Q68G41|Q68G41_RAT	Dodecenoyl-Coenzyme A delta isomerase (3,2 trans-enoyl-Coenzyme A isomerase) OS=Rattus norvegicus GN=Eci1 PE=1 SV=1	RAT	15	1.0666	1.08643	1.13763	1.15878	0.0335166	1.11236
824	21.25	37.57	45.2	32.68	30.24	tr|Q6AYI1|Q6AYI1_RAT	DEAD (Asp-Glu-Ala-Asp) box polypeptide 5 OS=Rattus norvegicus GN=Ddx5 PE=1 SV=1	RAT	24	1.01859	0.772681	1.05682	0.809096	0.136511	0.914296
825	21.25	21.35	77.68	64.73	64.73	sp|O35244|PRDX6_RAT	Peroxiredoxin-6 OS=Rattus norvegicus GN=Prdx6 PE=1 SV=3	RAT	16	0.990832	0.972747	0.937562	0.92045	0.02912	0.955398
826	21.22	24.16	58.05	46.31	40.27	tr|H7C5Y5|H7C5Y5_RAT	60S ribosomal protein L6 OS=Rattus norvegicus GN=Rpl6 PE=1 SV=2	RAT	14	0.903649	0.824138	0.887156	0.809096	0.0469337	0.85601
827	21.21	25	40.43	34.48	25.81	tr|F1LM18|F1LM18_RAT	Polypyrimidine tract-binding protein 1 OS=Rattus norvegicus GN=Ptbp1 PE=1 SV=1	RAT	22	0.912011	1.08643	0.879023	1.04713	0.0892125	0.981147
828	21.2	28.9	28.82	15.77	8.265	tr|F1M446|F1M446_RAT	Protein AI314180 OS=Rattus norvegicus GN=AI314180 PE=1 SV=3	RAT	21	0.972747	0.963829	0.990832	0.981748	0.0102973	0.977289
829	21.1	22.46	52.8	43.91	39.07	tr|A0A0G2JXC1|A0A0G2JXC1_RAT	Protein ERGIC-53 OS=Rattus norvegicus GN=Lman1 PE=1 SV=1	RAT	26	0.887156	1.00925	0.801678	0.912011	0.0819607	0.902524
830	21.05	21.16	39.43	31.24	25.52	tr|B1WC34|B1WC34_RAT	Protein Prkcsh OS=Rattus norvegicus GN=Prkcsh PE=1 SV=1	RAT	13	0.963829	1.04713	0.648634	0.698232	0.201945	0.839456
831	21.04	21.36	60.83	54.84	48.39	tr|A0A0G2JZR4|A0A0G2JZR4_RAT	Ras-related protein Rab-11B OS=Rattus norvegicus GN=Rab11b PE=1 SV=1	RAT	12	0.895365	1	0.847227	0.946237	0.0617503	0.922207
832	21	22.74	31.84	20.53	12.04	tr|A0A0G2JWD6|A0A0G2JWD6_RAT	AP-3 complex subunit beta OS=Rattus norvegicus GN=Ap3b1 PE=1 SV=1	RAT	14	0.981748	0.928966	0.862979	0.816582	0.0700817	0.897569
833	20.94	24.2	27.33	15.92	10.21	tr|A0A0G2QC02|A0A0G2QC02_RAT	Protein Skiv2l OS=Rattus norvegicus GN=Skiv2l PE=1 SV=1	RAT	14	1.01859	0.990832	1.05682	1.02802	0.0230251	1.02356
834	20.94	21.26	93.89	86.11	73.89	sp|P36972|APT_RAT	Adenine phosphoribosyltransferase OS=Rattus norvegicus GN=Aprt PE=1 SV=1	RAT	17	1.20226	1.0666	0.912011	0.816582	0.147342	0.999363
835	20.92	23.64	41.18	33.97	24.29	tr|A0A0G2K1D2|A0A0G2K1D2_RAT	Protein Rap1gds1 OS=Rattus norvegicus GN=Rap1gds1 PE=1 SV=1	RAT	13	0.972747	1	0.937562	0.954993	0.0238856	0.966325
836	20.78	22.65	37.2	25.59	14.54	tr|D3ZBS2|D3ZBS2_RAT	Inter-alpha-trypsin inhibitor heavy chain H3 OS=Rattus norvegicus GN=Itih3 PE=1 SV=3	RAT	14	0.47863	0.343558	0.717794	0.519996	0.260272	0.514995
837	20.77	20.98	41.95	31.97	25.4	sp|Q641Y0|OST48_RAT	Dolichyl-diphosphooligosaccharide--protein glycosyltransferase 48 kDa subunit OS=Rattus norvegicus GN=Ddost PE=2 SV=1	RAT	14	0.963829	1.21339	0.744732	0.928966	0.173417	0.962729
838	20.75	22.59	25.54	17.53	12.41	sp|Q64560|TPP2_RAT	Tripeptidyl-peptidase 2 OS=Rattus norvegicus GN=Tpp2 PE=2 SV=3	RAT	17	1	1.01859	1	1.01859	0.00921009	1.0093
839	20.73	25.77	31.32	21.41	17.53	tr|B5DFL9|B5DFL9_RAT	Protein Sestd1 OS=Rattus norvegicus GN=Sestd1 PE=2 SV=1	RAT	13	0.963829	1.00925	0.954993	1	0.0234781	0.982019
840	20.73	23.46	31.09	24.02	18.37	tr|F1LQZ8|F1LQZ8_RAT	Probable 2-oxoglutarate dehydrogenase E1 component DHKTD1, mitochondrial OS=Rattus norvegicus GN=Dhtkd1 PE=1 SV=3	RAT	17	0.912011	1.14815	0.77983	0.990832	0.139206	0.957707
841	20.69	21.36	47.93	32.37	29.25	tr|B2GV15|B2GV15_RAT	Dihydrolipoamide branched chain transacylase E2 OS=Rattus norvegicus GN=Dbt PE=1 SV=1	RAT	15	1.00925	0.963829	1	0.963829	0.0209904	0.984228
842	20.68	25.94	33.7	27.22	21.36	tr|F1LZF2|F1LZF2_RAT	Formin-binding protein 1 OS=Rattus norvegicus GN=Fnbp1 PE=1 SV=3	RAT	15	1.13763	1.10662	0.954993	0.928966	0.0883704	1.03205
843	20.65	21.09	56.56	38.69	33.26	tr|Q6P6U2|Q6P6U2_RAT	26S protease regulatory subunit 6A OS=Rattus norvegicus GN=Psmc3 PE=1 SV=1	RAT	13	0.990832	1.00925	0.972747	0.981748	0.0136623	0.988645
844	20.64	21.65	36.62	30.13	27.53	sp|Q68FX0|IDH3B_RAT	Isocitrate dehydrogenase [NAD] subunit beta, mitochondrial OS=Rattus norvegicus GN=Idh3B PE=2 SV=1	RAT	14	1.08643	1.21339	0.862979	0.963829	0.127382	1.03166
845	20.61	30.86	26.47	17.23	9.784	tr|F1M951|F1M951_RAT	Protein-tyrosine-phosphatase OS=Rattus norvegicus GN=Ptpn23 PE=1 SV=1	RAT	17	1.02802	1.03753	0.972747	0.990832	0.0263038	1.00728
846	20.6	21.23	65.52	52.22	43.35	tr|Q5RK10|Q5RK10_RAT	60S ribosomal protein L13a OS=Rattus norvegicus GN=Rpl13a PE=1 SV=1	RAT	12	0.895365	1.00925	0.937562	1.05682	0.0640893	0.974749
847	20.57	25.92	25.73	14.64	10.36	tr|Q45QJ4|Q45QJ4_RAT	Phosphoinositide phospholipase C OS=Rattus norvegicus GN=Plcb3 PE=1 SV=1	RAT	16	0.954993	1.00925	0.972747	1.02802	0.02912	0.991252
848	20.57	23.03	56.25	47.5	44.5	sp|Q5XIP9|TMM43_RAT	Transmembrane protein 43 OS=Rattus norvegicus GN=Tmem43 PE=2 SV=1	RAT	24	1.40605	1.30617	1.18032	1.1272	0.0866928	1.25493
849	20.57	21.15	51.3	45.24	38.62	sp|Q9R1E9|CTGF_RAT	Connective tissue growth factor OS=Rattus norvegicus GN=Ctgf PE=2 SV=1	RAT	13	0.847227	1.48594	0.847227	1.48594	0.273752	1.16658
850	20.54	37.34	66.22	56.3	52.82	tr|A0A0G2K3Q6|A0A0G2K3Q6_RAT	Fructose-bisphosphate aldolase OS=Rattus norvegicus GN=Aldoc PE=1 SV=1	RAT	32	0.954993	0.862979	1.01859	0.912011	0.0610298	0.937143
851	20.53	20.93	40.29	24.91	18.5	tr|D3ZGE6|D3ZGE6_RAT	Cortactin, isoform CRA_c OS=Rattus norvegicus GN=Cttn PE=1 SV=3	RAT	10	0.765597	0.831764	0.679204	0.744732	0.0720757	0.755324
852	20.51	25.3	41.28	27.84	18.88	tr|B2RYI2|B2RYI2_RAT	Signal recognition particle subunit SRP68 OS=Rattus norvegicus GN=Srp68 PE=1 SV=1	RAT	14	0.92045	0.963829	1.10662	1.15878	0.0947088	1.03742
853	20.51	23.89	38.74	35.09	28.6	tr|Q5U2N2|Q5U2N2_RAT	Protein Usp14 OS=Rattus norvegicus GN=Usp14 PE=1 SV=1	RAT	15	0.954993	0.990832	0.972747	1.00925	0.0205937	0.981956
854	20.48	20.59	86.07	81.09	78.61	sp|P04041|GPX1_RAT	Glutathione peroxidase 1 OS=Rattus norvegicus GN=Gpx1 PE=1 SV=4	RAT	23	0.946237	1.25893	0.92045	1.23595	0.144463	1.09039
855	20.47	22.49	70.48	53.74	53.74	tr|Q6P2A5|Q6P2A5_RAT	GTP:AMP phosphotransferase AK3, mitochondrial OS=Rattus norvegicus GN=Ak3 PE=1 SV=1	RAT	15	1.03753	1.09648	0.824138	0.870964	0.117947	0.957277
856	20.43	25.49	35.47	26.67	19.5	tr|D3ZIE9|D3ZIE9_RAT	Protein Aldh18a1 OS=Rattus norvegicus GN=Aldh18a1 PE=3 SV=1	RAT	18	1.08643	0.928966	1.1272	0.954993	0.0821671	1.0244
857	20.4	23.09	42.64	32.83	20.3	tr|Q5PQW8|Q5PQW8_RAT	Guanylate binding protein 2 OS=Rattus norvegicus GN=Gbp2 PE=1 SV=1	RAT	14	0.772681	0.534564	1.11686	0.765597	0.260617	0.797426
858	20.39	22.03	53.54	48.62	40.62	sp|B0BNA7|EIF3I_RAT	Eukaryotic translation initiation factor 3 subunit I OS=Rattus norvegicus GN=Eif3i PE=2 SV=1	RAT	13	1	0.972747	1.03753	1	0.0229882	1.00257
859	20.38	20.85	48.06	41.75	35.44	tr|D4A3E2|D4A3E2_RAT	Aminopeptidase-like 1 (Predicted) OS=Rattus norvegicus GN=Npepl1 PE=1 SV=2	RAT	11	1.21339	1.13763	1.08643	0.972747	0.0793609	1.10255
860	20.36	23.06	68.23	68.23	56.25	sp|Q6RUV5|RAC1_RAT	Ras-related C3 botulinum toxin substrate 1 OS=Rattus norvegicus GN=Rac1 PE=1 SV=1	RAT	17	0.92045	0.809096	0.879023	0.772681	0.0683915	0.845312
861	20.36	20.87	20.83	17.09	13.46	tr|F1M987|F1M987_RAT	Protein Scube1 OS=Rattus norvegicus GN=Scube1 PE=4 SV=1	RAT	13	0.954993	0.981748	0.954993	0.981748	0.0138146	0.96837
862	20.34	27.25	36.95	22.08	14.41	tr|F1LML7|F1LML7_RAT	Protein Hip1r OS=Rattus norvegicus GN=Hip1r PE=1 SV=1	RAT	17	0.972747	0.990832	1.01859	1.03753	0.0247966	1.00492
863	20.34	22.42	61.02	56.61	52.2	sp|P38983|RSSA_RAT	40S ribosomal protein SA OS=Rattus norvegicus GN=Rpsa PE=1 SV=3	RAT	15	0.963829	1.03753	0.954993	1.02802	0.0371119	0.996092
864	20.33	20.68	41.68	36	27.79	tr|F8WFH8|F8WFH8_RAT	Tryptophan--tRNA ligase, cytoplasmic OS=Rattus norvegicus GN=Wars PE=1 SV=1	RAT	18	0.946237	1.05682	0.887156	0.990832	0.0639477	0.970261
865	20.32	23.86	75.68	51.12	38.46	tr|G3V6W6|G3V6W6_RAT	Protein Psmc6 OS=Rattus norvegicus GN=Psmc6 PE=1 SV=1	RAT	16	0.990832	1.02802	0.981748	1.01859	0.0189858	1.0048
866	20.29	22.38	39.23	27.75	22.33	sp|P86182|CCD22_RAT	Coiled-coil domain-containing protein 22 OS=Rattus norvegicus GN=Ccdc22 PE=1 SV=2	RAT	12	1.31826	0.831764	1.39316	0.887156	0.225987	1.10758
867	20.29	20.53	52.53	38.48	30.62	sp|Q9JJ19|NHRF1_RAT	Na(+)/H(+) exchange regulatory cofactor NHE-RF1 OS=Rattus norvegicus GN=Slc9a3r1 PE=1 SV=3	RAT	10	0.946237	0.946237	0.954993	0.954993	0.00460515	0.950615
868	20.28	29.24	26.77	13.17	6.85	tr|F1LQ91|F1LQ91_RAT	Protein Dock11 OS=Rattus norvegicus GN=Dock11 PE=1 SV=2	RAT	16	1.09648	0.92045	0.963829	0.83946	0.0974347	0.955054
869	20.26	23.34	66.67	64.1	60.26	sp|P62982|RS27A_RAT	Ubiquitin-40S ribosomal protein S27a OS=Rattus norvegicus GN=Rps27a PE=1 SV=2	RAT	28	0.717794	0.672977	0.717794	0.679204	0.0300857	0.696942
870	20.24	23	46.22	36.5	29.81	sp|Q641Y2|NDUS2_RAT	NADH dehydrogenase [ubiquinone] iron-sulfur protein 2, mitochondrial OS=Rattus norvegicus GN=Ndufs2 PE=1 SV=1	RAT	12	0.990832	1.03753	0.954993	0.990832	0.0294971	0.993546
871	20.24	22.42	80.26	66.45	66.45	sp|Q05982|NDKA_RAT	Nucleoside diphosphate kinase A OS=Rattus norvegicus GN=Nme1 PE=1 SV=1	RAT	14	1.02802	1.0666	0.990832	1.02802	0.02605	1.02837
872	20.24	21.97	60.77	45.52	30.02	sp|P13221|AATC_RAT	Aspartate aminotransferase, cytoplasmic OS=Rattus norvegicus GN=Got1 PE=1 SV=3	RAT	10	0.887156	1.05682	0.862979	1.03753	0.0902539	0.96112
873	20.22	25.09	61.03	51.58	43.27	sp|O35077|GPDA_RAT	Glycerol-3-phosphate dehydrogenase [NAD(+)], cytoplasmic OS=Rattus norvegicus GN=Gpd1 PE=1 SV=4	RAT	17	1.95884	1.88799	3.83707	3.69828	0.324638	2.84555
874	20.18	25.97	29.88	17.78	12.51	tr|M0R7Z0|M0R7Z0_RAT	Uncharacterized protein OS=Rattus norvegicus GN=Eif5b PE=1 SV=1	RAT	19	0.972747	1.00925	0.972747	1.00925	0.0184186	0.991
875	20.18	21.3	76.9	66.67	52.81	sp|Q8R431|MGLL_RAT	Monoglyceride lipase OS=Rattus norvegicus GN=Mgll PE=1 SV=1	RAT	12	1.13763	1.07647	1.18032	1.1272	0.0326944	1.1304
876	20.17	25.3	24.61	15.4	9.269	sp|Q8CG09|MRP1_RAT	Multidrug resistance-associated protein 1 OS=Rattus norvegicus GN=Abcc1 PE=1 SV=2	RAT	15	0.990832	0.928966	1.04713	0.981748	0.0424539	0.987169
877	20.16	26.95	33.89	24.5	14.79	tr|F1LN59|F1LN59_RAT	Protein Eif4g2 OS=Rattus norvegicus GN=Eif4g2 PE=1 SV=2	RAT	20	0.972747	1.05682	0.981748	1.0666	0.0416785	1.01948
878	20.16	22.31	38.47	25.97	13.47	tr|A0A0G2K781|A0A0G2K781_RAT	Protein Ppfibp1 OS=Rattus norvegicus GN=Ppfibp1 PE=1 SV=1	RAT	12	0.912011	0.937562	0.981748	1.00925	0.039334	0.960143
879	20.16	20.44	42.55	32.32	27.11	sp|Q6AYK3|INO1_RAT	Inositol-3-phosphate synthase 1 OS=Rattus norvegicus GN=Isyna1 PE=3 SV=2	RAT	12	1.01859	0.990832	0.981748	0.954993	0.0230251	0.986541
880	20.16	20.25	41.22	34.01	25.9	tr|Q4KLL7|Q4KLL7_RAT	Protein Vps4b OS=Rattus norvegicus GN=Vps4b PE=1 SV=1	RAT	14	0.981748	0.963829	0.963829	0.937562	0.0163878	0.961742
881	20.15	25.92	22.39	12.13	6.599	tr|D4A5A6|D4A5A6_RAT	DNA-directed RNA polymerase OS=Rattus norvegicus GN=Polr2a PE=1 SV=1	RAT	15	0.879023	0.704693	1.10662	0.895365	0.158988	0.896426
882	20.15	21.72	49.64	46.04	39.33	tr|D3ZZC1|D3ZZC1_RAT	Protein Txndc5 OS=Rattus norvegicus GN=Txndc5 PE=1 SV=1	RAT	17	0.717794	0.928966	0.685488	0.895365	0.132041	0.806903
883	20.1	21.51	25.71	16.13	10.23	sp|Q63632|S12A4_RAT	Solute carrier family 12 member 4 OS=Rattus norvegicus GN=Slc12a4 PE=1 SV=1	RAT	13	0.879023	0.954993	0.903649	0.981748	0.0436694	0.929853
884	20.09	22.72	53.49	43.01	34.14	tr|Q3MHS7|Q3MHS7_RAT	GDP-mannose 4, 6-dehydratase OS=Rattus norvegicus GN=Gmds PE=2 SV=1	RAT	16	1.02802	1.18032	0.92045	1.04713	0.0884586	1.04398
885	20.09	20.27	56.38	43.62	38.83	tr|A0A0G2K995|A0A0G2K995_RAT	Filamin binding LIM protein 1, isoform CRA_a OS=Rattus norvegicus GN=Fblim1 PE=4 SV=1	RAT	22	0.619441	0.847227	0.625173	0.847227	0.15308	0.734767
886	20.06	22.58	55.24	45.95	32.14	tr|G3V8R1|G3V8R1_RAT	Nucleobindin 2, isoform CRA_b OS=Rattus norvegicus GN=Nucb2 PE=1 SV=1	RAT	15	0.937562	1.05682	0.937562	1.0666	0.0621914	0.999634
887	20.04	26.31	48.55	39.58	31.13	sp|Q6URK4|ROA3_RAT	Heterogeneous nuclear ribonucleoprotein A3 OS=Rattus norvegicus GN=Hnrnpa3 PE=1 SV=1	RAT	19	0.954993	0.954993	0.903649	0.903649	0.027624	0.929321
888	20.03	20.6	43.72	37.2	33.82	sp|Q6AY84|SCRN1_RAT	Secernin-1 OS=Rattus norvegicus GN=Scrn1 PE=1 SV=1	RAT	12	0.928966	1.48594	0.510505	0.801678	0.380009	0.931771
889	20.02	26.22	30.67	22.85	18.62	sp|Q32PX7|FUBP1_RAT	Far upstream element-binding protein 1 OS=Rattus norvegicus GN=Fubp1 PE=1 SV=1	RAT	15	1.03753	0.903649	1.14815	1	0.0856183	1.02233
890	20.02	20.55	30.89	22.34	13.68	tr|D4ADS9|D4ADS9_RAT	Protein Efr3a OS=Rattus norvegicus GN=Efr3a PE=1 SV=1	RAT	10	0.972747	1.00925	0.981748	1.00925	0.0164269	0.99325
891	20	22.62	40.33	26.49	21.24	sp|Q6P7P5|BZW1_RAT	Basic leucine zipper and W2 domain-containing protein 1 OS=Rattus norvegicus GN=Bzw1 PE=1 SV=1	RAT	13	0.990832	1.01859	1.00925	1.03753	0.0166038	1.01405
892	19.98	20.3	67.61	59.09	51.14	sp|P24090|FETUA_RAT	Alpha-2-HS-glycoprotein OS=Rattus norvegicus GN=Ahsg PE=1 SV=2	RAT	19	1.08643	0.654636	1.14815	0.691831	0.249631	0.895262
893	19.97	20.04	59.86	55.71	49.83	sp|Q920J4|TXNL1_RAT	Thioredoxin-like protein 1 OS=Rattus norvegicus GN=Txnl1 PE=1 SV=3	RAT	11	0.972747	1.05682	0.954993	1.03753	0.0424361	1.00552
894	19.96	22.57	50.14	45.75	37.81	tr|Q6AYU5|Q6AYU5_RAT	Poly(RC) binding protein 2 OS=Rattus norvegicus GN=Pcbp2 PE=1 SV=1	RAT	21	0.990832	1.21339	0.879023	1.0666	0.11714	1.03746
895	19.95	20.34	28.57	17.28	10.91	tr|G3V6F4|G3V6F4_RAT	O-linked N-acetylglucosamine (GlcNAc) transferase (UDP-N-acetylglucosamine:polypeptide-N-acetylglucosaminyl transferase), isoform CRA_b OS=Rattus norvegicus GN=Ogt PE=1 SV=2	RAT	10	1.00925	0.963829	1.01859	0.972747	0.0234781	0.991105
896	19.94	39.86	78.37	72.65	67.76	sp|P68255|1433T_RAT	14-3-3 protein theta OS=Rattus norvegicus GN=Ywhaq PE=1 SV=1	RAT	35	1.1695	1.28233	0.928966	1.01859	0.123629	1.09985
897	19.93	24.36	32.95	23.38	19.16	tr|G3V856|G3V856_RAT	Neuronal guanine nucleotide exchange factor (Predicted) OS=Rattus norvegicus GN=Ngef PE=1 SV=1	RAT	13	0.990832	1.01859	1.00925	1.02802	0.0135817	1.01167
898	19.92	22.6	69.86	52.05	43.84	sp|P15865|H14_RAT	Histone H1.4 OS=Rattus norvegicus GN=Hist1h1e PE=1 SV=3	RAT	26	0.879023	0.972747	0.92045	1.00925	0.0525007	0.945368
899	19.91	25.81	38.92	34.16	29.4	sp|B5DFN2|SAHH2_RAT	Adenosylhomocysteinase 2 OS=Rattus norvegicus GN=Ahcyl1 PE=1 SV=2	RAT	16	1	1.01859	0.92045	0.937562	0.0424361	0.969151
900	19.91	24.52	33.93	24.41	22.62	tr|D3ZLM5|D3ZLM5_RAT	NHL repeat containing 2 (Predicted) OS=Rattus norvegicus GN=Nhlrc2 PE=1 SV=1	RAT	15	1.20226	1.21339	1.03753	1.04713	0.0736945	1.12508
901	19.9	28.58	26.33	20.62	16.55	tr|G3V9S9|G3V9S9_RAT	Protein Sec24d OS=Rattus norvegicus GN=Sec24d PE=1 SV=3	RAT	20	0.954993	0.972747	0.954993	0.963829	0.00765111	0.96164
902	19.89	24.57	44.65	30.31	21.79	sp|Q5XIN6|LETM1_RAT	LETM1 and EF-hand domain-containing protein 1, mitochondrial OS=Rattus norvegicus GN=Letm1 PE=1 SV=1	RAT	16	0.895365	0.928966	0.903649	0.946237	0.0220079	0.918554
903	19.88	20.19	70.31	59.38	50.63	tr|A0A0G2K1V7|A0A0G2K1V7_RAT	Protein Sgcb OS=Rattus norvegicus GN=Sgcb PE=4 SV=1	RAT	15	0.954993	1.03753	0.903649	0.981748	0.049802	0.96948
904	19.85	20.51	31.4	21.55	14.64	tr|F1M1N9|F1M1N9_RAT	Protein Abi3bp OS=Rattus norvegicus GN=Abi3bp PE=1 SV=3	RAT	17	0.887156	0.717794	0.831764	0.672977	0.110388	0.777423
905	19.83	20.22	35.02	27.53	22.47	tr|Q5U2U8|Q5U2U8_RAT	Bcl2-associated athanogene 3 OS=Rattus norvegicus GN=Bag3 PE=1 SV=1	RAT	13	0.928966	0.990832	0.879023	0.937562	0.0424539	0.934096
906	19.81	19.9	69.57	62.5	61.96	sp|Q6P7Q4|LGUL_RAT	Lactoylglutathione lyase OS=Rattus norvegicus GN=Glo1 PE=1 SV=3	RAT	11	0.903649	1.21339	0.816582	1.08643	0.15401	1.00501
907	19.79	22.98	56.41	46.72	38.46	sp|P68182|KAPCB_RAT	cAMP-dependent protein kinase catalytic subunit beta OS=Rattus norvegicus GN=Prkacb PE=1 SV=2	RAT	18	1.00925	1.07647	0.937562	1	0.0489481	1.00582
908	19.78	22.4	88.46	83.85	68.46	sp|Q4FZT6|H2A3_RAT	Histone H2A type 3 OS=Rattus norvegicus PE=2 SV=3	RAT	39	0.816582	0.648634	0.751623	0.591562	0.124649	0.7021
909	19.76	20.92	37.39	28.8	25.76	tr|A0A096MIS6|A0A096MIS6_RAT	Complement component receptor 1-like protein OS=Rattus norvegicus GN=Cr1l PE=1 SV=2	RAT	16	1	1	0.972747	0.972747	0.0138146	0.986374
910	19.76	20.23	37.83	28.19	23.86	sp|Q4KMA2|RD23B_RAT	UV excision repair protein RAD23 homolog B OS=Rattus norvegicus GN=Rad23b PE=1 SV=1	RAT	12	0.972747	0.972747	0.990832	0.990832	0.0092101	0.98179
911	19.75	20.08	31.16	24.36	21.39	tr|A0A0H2UHL9|A0A0H2UHL9_RAT	Drebrin OS=Rattus norvegicus GN=Dbn1 PE=1 SV=1	RAT	12	0.816582	0.77983	0.724436	0.704693	0.0586285	0.756385
912	19.74	21.58	22.66	12.54	7.288	tr|A0A0G2K1P8|A0A0G2K1P8_RAT	Protein Triobp OS=Rattus norvegicus GN=Triobp PE=1 SV=1	RAT	15	1.0666	0.928966	0.946237	0.83946	0.0855853	0.945315
913	19.73	20.05	55.02	41.63	32.06	sp|Q63570|PRS6B_RAT	26S protease regulatory subunit 6B OS=Rattus norvegicus GN=Psmc4 PE=1 SV=1	RAT	13	0.990832	0.972747	0.981748	0.963829	0.0102973	0.977289
914	19.71	24.39	67.63	61.83	53.94	tr|Q6P9V6|Q6P9V6_RAT	Proteasome subunit alpha type OS=Rattus norvegicus GN=Psma5 PE=1 SV=1	RAT	16	0.879023	1.00925	0.816582	0.928966	0.0776174	0.908456
915	19.71	20.23	36.62	30.3	20.63	tr|D3ZRN5|D3ZRN5_RAT	Protein Trove2 OS=Rattus norvegicus GN=Trove2 PE=1 SV=1	RAT	11	0.946237	0.981748	0.928966	0.963829	0.0205937	0.955195
916	19.71	20.19	49.47	43.88	31.12	sp|B0BN93|PSD13_RAT	26S proteasome non-ATPase regulatory subunit 13 OS=Rattus norvegicus GN=Psmd13 PE=1 SV=1	RAT	10	1.02802	1.07647	0.903649	0.937562	0.0700093	0.986423
917	19.7	21.13	33.29	25.67	14.65	tr|D3ZFH5|D3ZFH5_RAT	Protein Itih2 OS=Rattus norvegicus GN=Itih2 PE=1 SV=3	RAT	13	0.529663	0.420727	0.672977	0.539511	0.16545	0.540719
918	19.7	20.05	37.7	26.05	21.86	sp|P10959|EST1C_RAT	Carboxylesterase 1C OS=Rattus norvegicus GN=Ces1c PE=1 SV=3	RAT	14	1.05682	0.794328	0.903649	0.679204	0.162276	0.8585
919	19.68	20.37	42.35	32.31	21.94	tr|Q4KLK7|Q4KLK7_RAT	Nucleolar protein 5A OS=Rattus norvegicus GN=Nop56 PE=1 SV=1	RAT	14	0.824138	0.724436	0.963829	0.847227	0.101363	0.839908
920	19.65	20.7	42.89	33.11	26.67	tr|B0BMT9|B0BMT9_RAT	Protein Sqrdl OS=Rattus norvegicus GN=Sqrdl PE=1 SV=1	RAT	12	1.35519	1.72187	0.879023	1.1272	0.244031	1.27082
921	19.63	22.07	29.09	23	15.02	sp|P29534|VCAM1_RAT	Vascular cell adhesion protein 1 OS=Rattus norvegicus GN=Vcam1 PE=2 SV=1	RAT	13	1.24738	1.59956	1.14815	1.48594	0.131761	1.37026
922	19.59	20.79	37.29	27.55	21.62	sp|Q91ZW6|TMLH_RAT	Trimethyllysine dioxygenase, mitochondrial OS=Rattus norvegicus GN=Tmlhe PE=1 SV=2	RAT	10	0.963829	0.981748	0.937562	0.954993	0.0166038	0.959533
923	19.58	21.32	36.11	29.95	16.64	tr|Q5M891|Q5M891_RAT	C4b-binding protein alpha chain OS=Rattus norvegicus GN=C4bpa PE=1 SV=1	RAT	11	0.937562	0.794328	0.831764	0.698232	0.105067	0.815472
924	19.57	21.19	42.56	31.63	26.28	sp|Q9Z2F5|CTBP1_RAT	C-terminal-binding protein 1 OS=Rattus norvegicus GN=Ctbp1 PE=1 SV=3	RAT	12	0.937562	0.981748	0.954993	1	0.0247966	0.968576
925	19.55	22.49	32.04	26.81	20.67	tr|F1M6Q3|F1M6Q3_RAT	Protein Col4a2 OS=Rattus norvegicus GN=Col4a2 PE=1 SV=3	RAT	45	0.83946	0.758578	0.972747	0.887156	0.0897463	0.864485
926	19.55	20.72	47.2	37.81	36.47	tr|G3V836|G3V836_RAT	Clusterin OS=Rattus norvegicus GN=Clu PE=1 SV=1	RAT	20	1.02802	1.05682	1.15878	1.19124	0.0613764	1.10871
927	19.53	19.61	40.55	39.86	36.43	tr|F7ESM5|F7ESM5_RAT	Nitrilase 1, isoform CRA_a OS=Rattus norvegicus GN=Nit1 PE=1 SV=1	RAT	12	0.483059	1.75388	0.353183	1.22462	0.596809	0.953685
928	19.52	22.69	61.83	53.49	39.78	sp|O88656|ARC1B_RAT	Actin-related protein 2/3 complex subunit 1B OS=Rattus norvegicus GN=Arpc1b PE=1 SV=3	RAT	19	1.21339	1.28233	0.990832	1.03753	0.106534	1.13102
929	19.5	19.66	39.35	31.36	26.63	tr|D3Z900|D3Z900_RAT	Mitochondrial amidoxime reducing component 2 OS=Rattus norvegicus GN=Marc2 PE=1 SV=2	RAT	11	1.02802	0.954993	0.990832	0.928966	0.0382757	0.975702
930	19.48	25.2	47.71	40.96	39.04	sp|Q794E4|HNRPF_RAT	Heterogeneous nuclear ribonucleoprotein F OS=Rattus norvegicus GN=Hnrnpf PE=1 SV=3	RAT	15	0.912011	0.895365	0.887156	0.870964	0.0166038	0.891374
931	19.48	19.95	53.87	46.46	31.99	sp|P24329|THTR_RAT	Thiosulfate sulfurtransferase OS=Rattus norvegicus GN=Tst PE=1 SV=3	RAT	13	0.972747	1.10662	0.77983	0.870964	0.130272	0.932541
932	19.45	21.4	62.74	52.09	46.77	sp|Q9Z1H9|PRDBP_RAT	Protein kinase C delta-binding protein OS=Rattus norvegicus GN=Prkcdbp PE=1 SV=1	RAT	19	1.07647	1.49968	0.824138	1.1695	0.211721	1.14245
933	19.44	23.35	46.34	36.21	28.66	tr|Q5XIH3|Q5XIH3_RAT	NADH dehydrogenase (Ubiquinone) flavoprotein 1 OS=Rattus norvegicus GN=Ndufv1 PE=1 SV=1	RAT	13	0.981748	1.01859	0.963829	1	0.0205937	0.991042
934	19.42	22.03	31.98	22.93	19.46	sp|Q66HG5|TM9S2_RAT	Transmembrane 9 superfamily member 2 OS=Rattus norvegicus GN=Tm9sf2 PE=2 SV=1	RAT	13	1	0.963829	0.963829	0.928966	0.02605	0.964156
935	19.4	19.56	49.01	36.18	32.57	tr|D4A4T0|D4A4T0_RAT	Protein Stub1 OS=Rattus norvegicus GN=Stub1 PE=1 SV=1	RAT	11	1.02802	1	1.02802	1.00925	0.0119488	1.01632
936	19.39	20.42	34.32	20.62	14.41	sp|P97878|EXOC5_RAT	Exocyst complex component 5 OS=Rattus norvegicus GN=Exoc5 PE=1 SV=1	RAT	12	0.744732	0.946237	0.751623	0.954993	0.119256	0.849396
937	19.37	19.48	63.3	46.18	36.7	sp|Q62651|ECH1_RAT	Delta(3,5)-Delta(2,4)-dienoyl-CoA isomerase, mitochondrial OS=Rattus norvegicus GN=Ech1 PE=1 SV=2	RAT	12	0.928966	1.00925	0.816582	0.887156	0.0766039	0.910489
938	19.36	22.83	53.53	45.01	37.47	sp|Q3B8Q2|IF4A3_RAT	Eukaryotic initiation factor 4A-III OS=Rattus norvegicus GN=Eif4a3 PE=1 SV=1	RAT	18	0.963829	1	0.963829	1	0.0184186	0.981915
939	19.36	19.57	53.38	42.03	36.47	tr|Q6IMX3|Q6IMX3_RAT	Acetyl-Coenzyme A dehydrogenase, short chain, isoform CRA_a OS=Rattus norvegicus GN=Acads PE=1 SV=1	RAT	12	1.31826	1.1272	1.20226	1.02802	0.0907454	1.16893
940	19.33	19.46	51.82	41.97	34.67	sp|P20788|UCRI_RAT	Cytochrome b-c1 complex subunit Rieske, mitochondrial OS=Rattus norvegicus GN=Uqcrfs1 PE=1 SV=2	RAT	12	0.937562	1	0.981748	1.05682	0.0430277	0.994032
941	19.32	19.74	46.33	42.37	32.77	tr|D3ZV91|D3ZV91_RAT	Protein L3hypdh OS=Rattus norvegicus GN=L3hypdh PE=1 SV=1	RAT	11	0.972747	0.981748	0.937562	0.946237	0.0189858	0.959574
942	19.31	20.55	37.74	25.38	21.91	sp|P20673|ARLY_RAT	Argininosuccinate lyase OS=Rattus norvegicus GN=Asl PE=2 SV=1	RAT	11	1.0666	1.03753	0.83946	0.816582	0.119975	0.940042
943	19.29	22.73	48.61	29.86	22.22	sp|Q5U2Y3|MPP7_RAT	MAGUK p55 subfamily member 7 OS=Rattus norvegicus GN=Mpp7 PE=2 SV=2	RAT	15	0.946237	0.92045	0.937562	0.903649	0.017642	0.926975
944	19.28	24.54	43.52	30.36	28.74	tr|D3Z9K4|D3Z9K4_RAT	Protein Plekho2 OS=Rattus norvegicus GN=Plekho2 PE=1 SV=2	RAT	15	0.847227	0.912011	0.648634	0.698232	0.137861	0.776526
945	19.27	28.72	21.36	12.6	5.452	tr|D3ZQY4|D3ZQY4_RAT	Protein Fryl OS=Rattus norvegicus GN=Fryl PE=1 SV=2	RAT	27	1.00925	1.10662	1.48594	1.64437	0.199758	1.31155
946	19.27	20.85	49.45	41.21	33.52	tr|A0A0G2KAI8|A0A0G2KAI8_RAT	Protein Drg2 OS=Rattus norvegicus GN=Drg2 PE=1 SV=1	RAT	12	1.01859	1.0666	1	1.04713	0.0247966	1.03308
947	19.26	19.4	44.87	41.06	34.6	sp|Q99MZ8|LASP1_RAT	LIM and SH3 domain protein 1 OS=Rattus norvegicus GN=Lasp1 PE=1 SV=1	RAT	19	0.981748	0.704693	0.895365	0.648634	0.168291	0.80761
948	19.25	24.34	27.91	15.47	6.91	tr|D3ZN27|D3ZN27_RAT	Protein Dnajc13 OS=Rattus norvegicus GN=Dnajc13 PE=1 SV=2	RAT	17	0.954993	1.09648	0.92045	1.05682	0.0713963	1.00718
949	19.25	23.83	59.48	41	27.49	sp|F1LMZ8|PSD11_RAT	26S proteasome non-ATPase regulatory subunit 11 OS=Rattus norvegicus GN=Psmd11 PE=1 SV=2	RAT	14	1.01859	0.879023	0.937562	0.809096	0.0844671	0.911068
950	19.24	23.03	22	12.78	8.455	tr|A0A0G2JY22|A0A0G2JY22_RAT	Protein Dip2b OS=Rattus norvegicus GN=Dip2b PE=1 SV=1	RAT	15	0.954993	0.981748	0.990832	1.00925	0.0198761	0.984206
951	19.22	22.32	30.75	18.42	10.36	tr|F1M775|F1M775_RAT	Protein Diaph1 OS=Rattus norvegicus GN=Diaph1 PE=1 SV=3	RAT	16	1.20226	1.49968	1.36773	1.69044	0.124235	1.44003
952	19.2	21.57	32.16	22.85	15.66	sp|Q04931|SSRP1_RAT	FACT complex subunit SSRP1 OS=Rattus norvegicus GN=Ssrp1 PE=1 SV=2	RAT	13	0.954993	0.564937	0.847227	0.524807	0.2527	0.722991
953	19.18	23.44	64.84	54.69	42.97	sp|P19511|AT5F1_RAT	ATP synthase F(0) complex subunit B1, mitochondrial OS=Rattus norvegicus GN=Atp5f1 PE=1 SV=1	RAT	18	1.00925	1.15878	0.831764	0.963829	0.11788	0.990906
954	19.15	31.64	62.61	54.27	41.24	tr|F1LPQ6|F1LPQ6_RAT	Protein Ighm OS=Rattus norvegicus GN=Ighm PE=4 SV=2	RAT	37					#DIV/0!	#DIV/0!
955	19.14	49.16	95.97	83.47	61.69	sp|Q63610|TPM3_RAT	Tropomyosin alpha-3 chain OS=Rattus norvegicus GN=Tpm3 PE=1 SV=2	RAT	41	1.01859	1.03753	1.04713	1.05682	0.0135817	1.04002
956	19.14	33.31	33.49	17.73	8.055	tr|D4ABD7|D4ABD7_RAT	Protein Trip11 OS=Rattus norvegicus GN=Trip11 PE=1 SV=3	RAT	23	1.01859	0.92045	1.27057	1.14815	0.121283	1.08944
957	19.14	20.5	33.49	24.37	18.4	tr|Q6AYD5|Q6AYD5_RAT	G1 to S phase transition 1 OS=Rattus norvegicus GN=Gspt1 PE=1 SV=1	RAT	10	1.03753	1.09648	0.972747	1.01859	0.0430277	1.03134
958	19.12	21.66	29.84	18.46	14.03	tr|D3ZQM0|D3ZQM0_RAT	Protein Sf3a1 OS=Rattus norvegicus GN=Sf3a1 PE=1 SV=1	RAT	13	1.34276	1.04713	1.34276	1.04713	0.123703	1.19495
959	19.12	20.27	65.6	56.38	53.19	sp|B0BNE5|ESTD_RAT	S-formylglutathione hydrolase OS=Rattus norvegicus GN=Esd PE=2 SV=1	RAT	15	1.0666	0.954993	1.01859	0.912011	0.0598273	0.988048
960	19.09	19.55	84.54	68.6	54.11	sp|P09527|RAB7A_RAT	Ras-related protein Rab-7a OS=Rattus norvegicus GN=Rab7a PE=1 SV=2	RAT	13	1.09648	1.01859	1.00925	0.937562	0.0554458	1.01547
961	19.04	22.19	52.13	39.63	34.84	sp|P50609|FMOD_RAT	Fibromodulin OS=Rattus norvegicus GN=Fmod PE=2 SV=1	RAT	25	0.586138	0.954993	0.679204	1.09648	0.247768	0.829203
962	19.04	21.3	51.08	44	34.46	tr|D3ZUB0|D3ZUB0_RAT	Protein Rcn1 OS=Rattus norvegicus GN=Rcn1 PE=1 SV=1	RAT	14	1.02802	1.0666	0.963829	1.00925	0.0363586	1.01692
963	19.04	19.23	71.97	59.24	50.32	tr|A0A0H2UI38|A0A0H2UI38_RAT	Protein LOC100910336 OS=Rattus norvegicus GN=LOC100910336 PE=4 SV=1	RAT	10	0.990832	1.40605	0.787046	1.09648	0.208938	1.0701
964	19.02	22.65	52.47	37.88	28.71	sp|P51583|PUR6_RAT	Multifunctional protein ADE2 OS=Rattus norvegicus GN=Paics PE=1 SV=3	RAT	13	1.07647	1.13763	1.1272	1.20226	0.0394092	1.13589
965	19.02	20.47	34.62	22.88	14.26	tr|F1M943|F1M943_RAT	Protein Armc8 OS=Rattus norvegicus GN=Armc8 PE=1 SV=2	RAT	9	0.981748	1.02802	0.990832	1.03753	0.0234781	1.00953
966	18.99	19.54	35.02	25.3	19.84	tr|E9PTF9|E9PTF9_RAT	Protein Wasf2 OS=Rattus norvegicus GN=Wasf2 PE=1 SV=3	RAT	12	0.990832	0.981748	0.981748	0.963829	0.0100038	0.979539
967	18.98	20.54	67.44	59.53	51.16	sp|M0RC99|RAB5A_RAT	Ras-related protein Rab-5A OS=Rattus norvegicus GN=Rab5a PE=2 SV=1	RAT	14	0.954993	0.946237	0.946237	0.928966	0.0100038	0.944108
968	18.96	19.35	43.34	38.81	28.9	tr|A0A0G2K9I8|A0A0G2K9I8_RAT	Uncharacterized protein OS=Rattus norvegicus GN=LOC100361025 PE=4 SV=1	RAT	10	0.990832	1.04713	0.972747	1.02802	0.02912	1.00968
969	18.92	19.06	52.96	44.86	40.81	tr|G3V804|G3V804_RAT	Sideroflexin OS=Rattus norvegicus GN=Sfxn3 PE=1 SV=1	RAT	13	2.42103	3.94457	1.03753	1.69044	0.475887	2.27339
970	18.91	35.31	27.87	13.56	4.841	tr|D4A4K4|D4A4K4_RAT	Protein Vps13c OS=Rattus norvegicus GN=Vps13c PE=1 SV=2	RAT	22	0.501187	0.946237	0.666807	1.25893	0.341394	0.843289
971	18.91	21.82	33.81	26.1	18.24	tr|Q3KRC3|Q3KRC3_RAT	Protein Srpr OS=Rattus norvegicus GN=Srpr PE=1 SV=1	RAT	13	0.928966	0.972747	0.981748	1.02802	0.0359652	0.977869
972	18.91	20.11	48.82	37.74	32.08	tr|G3V9N7|G3V9N7_RAT	Protein Pacsin3 OS=Rattus norvegicus GN=Pacsin3 PE=1 SV=3	RAT	12	1	0.990832	0.879023	0.870964	0.0645484	0.935205
973	18.85	19.91	28.16	21.18	14.74	tr|A0A0G2JUJ9|A0A0G2JUJ9_RAT	Protein Sec63 OS=Rattus norvegicus GN=Sec63 PE=1 SV=1	RAT	11	1.00925	0.990832	1.00925	0.990832	0.00921008	1.00004
974	18.84	21.84	65.8	60.1	51.3	sp|P61589|RHOA_RAT	Transforming protein RhoA OS=Rattus norvegicus GN=Rhoa PE=1 SV=1	RAT	17	0.92045	0.912011	0.946237	0.937562	0.0145621	0.929065
975	18.83	21.6	27.58	19.27	15.24	sp|P58405|STRN3_RAT	Striatin-3 OS=Rattus norvegicus GN=Strn3 PE=1 SV=2	RAT	12	1	0.990832	1.00925	1	0.00651268	1.00002
976	18.82	19.05	35.84	27.36	26.39	tr|Q4FZU0|Q4FZU0_RAT	Acid phosphatase 6, lysophosphatidic OS=Rattus norvegicus GN=Acp6 PE=1 SV=1	RAT	13	1.2942	1.24738	1.11686	1.09648	0.0706818	1.18873
977	18.79	21.02	39.36	29.79	25.74	tr|D3ZM91|D3ZM91_RAT	Protein Sync OS=Rattus norvegicus GN=Sync PE=1 SV=1	RAT	12	0.83946	0.972747	1.23595	1.41906	0.201828	1.1168
978	18.78	19.76	63.96	54.05	43.84	sp|P13803|ETFA_RAT	Electron transfer flavoprotein subunit alpha, mitochondrial OS=Rattus norvegicus GN=Etfa PE=1 SV=4	RAT	14	1.25893	1.39316	0.912011	1.00925	0.167818	1.14334
979	18.78	19.71	33.57	26.22	14.86	sp|P13697|MAOX_RAT	NADP-dependent malic enzyme OS=Rattus norvegicus GN=Me1 PE=1 SV=2	RAT	10	1.78649	1.58489	1.59956	1.40605	0.0844417	1.59425
980	18.78	18.84	59.55	56.74	54.49	tr|Q2IBC6|Q2IBC6_RAT	Caveolin OS=Rattus norvegicus GN=Cav1 PE=1 SV=1	RAT	19	0.83946	0.60256	1.04713	0.737904	0.201098	0.806763
981	18.77	20.04	45.38	40.22	26.09	sp|O35964|SH3G1_RAT	Endophilin-A2 OS=Rattus norvegicus GN=Sh3gl1 PE=1 SV=1	RAT	11	0.937562	0.963829	0.928966	0.954993	0.0145621	0.946338
982	18.74	19.29	40.64	33.25	26.6	sp|Q9R0I8|PI42A_RAT	Phosphatidylinositol 5-phosphate 4-kinase type-2 alpha OS=Rattus norvegicus GN=Pip4k2a PE=1 SV=1	RAT	10	1.49968	1.10662	1.1272	0.809096	0.215723	1.13565
983	18.7	20.44	54.89	41.64	35.96	tr|A0A0G2JUX5|A0A0G2JUX5_RAT	Transcriptional activator protein Pur-beta OS=Rattus norvegicus GN=Purb PE=1 SV=1	RAT	13	0.816582	0.903649	0.787046	0.879023	0.0552584	0.846575
984	18.69	25.63	63.94	57.27	50.61	sp|P37397|CNN3_RAT	Calponin-3 OS=Rattus norvegicus GN=Cnn3 PE=1 SV=1	RAT	21	0.855067	0.972747	0.816582	0.928966	0.0683915	0.893341
985	18.69	20.31	45.39	35.46	28.37	tr|Q5M8C3|Q5M8C3_RAT	Protein Serpina4 OS=Rattus norvegicus GN=Serpina4 PE=1 SV=1	RAT	16	0.794328	0.717794	0.855067	0.772681	0.06262	0.784967
986	18.65	20.07	37.76	26.76	22.58	sp|P04762|CATA_RAT	Catalase OS=Rattus norvegicus GN=Cat PE=1 SV=3	RAT	12	1.01859	1.07647	0.954993	1.00925	0.0424539	1.01483
987	18.64	20.81	31.34	24.05	17.63	tr|F1M9A2|F1M9A2_RAT	Sodium/calcium exchanger 2 OS=Rattus norvegicus GN=Slc8a2 PE=4 SV=3	RAT	13	0.946237	0.946237	0.912011	0.912011	0.0184186	0.929124
988	18.64	19.54	93.33	92.59	74.81	sp|P11762|LEG1_RAT	Galectin-1 OS=Rattus norvegicus GN=Lgals1 PE=1 SV=2	RAT	48	0.524807	0.711214	0.416869	0.564937	0.190214	0.554457
989	18.63	19.2	25.96	19.26	14.27	tr|G3V9U0|G3V9U0_RAT	Acyl-CoA synthetase short-chain family member 2 (Predicted) OS=Rattus norvegicus GN=Acss2 PE=1 SV=1	RAT	11	1.13763	1.09648	1.10662	1.05682	0.0262656	1.09939
990	18.61	21.03	35.93	22.3	21.42	sp|P16303|CES1D_RAT	Carboxylesterase 1D OS=Rattus norvegicus GN=Ces1d PE=1 SV=2	RAT	12	1.14815	1.35519	1.22462	1.45881	0.0920309	1.29669
991	18.59	21.76	34.24	23.88	15.16	tr|E9PTJ8|E9PTJ8_RAT	Rho guanine nucleotide exchange factor 1 OS=Rattus norvegicus GN=Arhgef1 PE=1 SV=3	RAT	16	1.02802	1.03753	1.01859	1.02802	0.00651267	1.02804
992	18.56	23.25	54.3	47.48	35.91	tr|Q5XIP0|Q5XIP0_RAT	DnaJ (Hsp40) homolog, subfamily B, member 4 OS=Rattus norvegicus GN=Dnajb4 PE=1 SV=1	RAT	13	0.92045	1	0.912011	0.981748	0.0398436	0.953552
993	18.55	18.7	58.65	41.67	38.46	tr|A0A0G2K350|A0A0G2K350_RAT	Protein Napg OS=Rattus norvegicus GN=Napg PE=1 SV=1	RAT	11	0.972747	1.04713	0.928966	1.00925	0.044213	0.989524
994	18.48	23.24	24.24	13.76	6.65	tr|G3V7M0|G3V7M0_RAT	Protein Cnot1 OS=Rattus norvegicus GN=Cnot1 PE=1 SV=1	RAT	22	0.855067	0.737904	1.39316	1.18032	0.249364	1.04161
995	18.48	18.62	55.68	49.62	39.02	tr|D3ZG43|D3ZG43_RAT	NADH dehydrogenase (Ubiquinone) Fe-S protein 3 (Predicted), isoform CRA_c OS=Rattus norvegicus GN=Ndufs3 PE=1 SV=1	RAT	9	0.963829	1	0.954993	0.990832	0.0189858	0.977413
996	18.47	19.05	27.84	15.56	9.909	tr|F1M9W9|F1M9W9_RAT	Protein Trappc8 OS=Rattus norvegicus GN=Trappc8 PE=1 SV=2	RAT	14	0.685488	0.83946	0.870964	1.0666	0.156652	0.865627
997	18.44	18.7	36.23	27.18	19.72	tr|A0A0H2UHZ6|A0A0H2UHZ6_RAT	Poly(U)-binding-splicing factor PUF60 OS=Rattus norvegicus GN=Puf60 PE=1 SV=1	RAT	12	1.00925	0.963829	0.990832	0.946237	0.0247966	0.977538
998	18.4	21.19	38.9	25.34	21.31	tr|D3ZWA8|D3ZWA8_RAT	Protein Appl1 OS=Rattus norvegicus GN=Appl1 PE=1 SV=3	RAT	16	1.00925	0.954993	1	0.946237	0.0280055	0.977621
999	18.37	20.01	75.5	62.25	52.98	sp|P62278|RS13_RAT	40S ribosomal protein S13 OS=Rattus norvegicus GN=Rps13 PE=1 SV=2	RAT	11	0.83946	1.02802	0.685488	0.816582	0.145087	0.842387
1000	18.36	20.84	30.55	20.29	14.8	sp|P25286|VPP1_RAT	V-type proton ATPase 116 kDa subunit a isoform 1 OS=Rattus norvegicus GN=Atp6v0a1 PE=2 SV=1	RAT	10	0.990832	0.954993	1.00925	0.972747	0.0205937	0.981956
1001	18.36	19.55	47.8	35.02	25.77	tr|G3V6P2|G3V6P2_RAT	Dihydrolipoamide S-succinyltransferase (E2 component of 2-oxo-glutarate complex), isoform CRA_a OS=Rattus norvegicus GN=Dlst PE=1 SV=1	RAT	14	1.01859	1.14815	0.903649	1.01859	0.0846396	1.02225
1002	18.33	18.42	53.69	50.44	46.9	tr|Q6IN22|Q6IN22_RAT	Cathepsin B OS=Rattus norvegicus GN=Ctsb PE=1 SV=1	RAT	20	0.972747	1.00925	0.972747	1.01859	0.0209904	0.993335
1003	18.31	19.99	72.4	63.8	60.18	tr|B6DYP8|B6DYP8_RAT	Glutathione S-transferase OS=Rattus norvegicus GN=Gsta1 PE=1 SV=1	RAT	20	2.26986	1.24738	2.24905	1.23595	0.290744	1.75056
1004	18.28	19.76	51.61	47.1	44.84	tr|Q4V8E2|Q4V8E2_RAT	Proteasome (Prosome, macropain) 26S subunit, non-ATPase, 14 OS=Rattus norvegicus GN=Psmd14 PE=1 SV=1	RAT	17	0.990832	1	0.972747	0.981748	0.0102973	0.986332
1005	18.25	21.74	33.33	22.8	18.27	tr|G3V7U6|G3V7U6_RAT	Calpain-5 OS=Rattus norvegicus GN=Capn5 PE=1 SV=2	RAT	16	1.25893	0.903649	1.1272	0.809096	0.173549	1.02472
1006	18.22	18.4	58.48	44.85	34.55	sp|Q5FWY5|AIP_RAT	AH receptor-interacting protein OS=Rattus norvegicus GN=Aip PE=1 SV=1	RAT	10	0.981748	0.990832	0.972747	0.981748	0.0065127	0.981769
1007	18.21	18.58	51.72	45.69	40.09	tr|A0A0G2JSG6|A0A0G2JSG6_RAT	Adenylate kinase 2, mitochondrial OS=Rattus norvegicus GN=Ak2 PE=1 SV=1	RAT	12	1	1.03753	1.04713	1.08643	0.0294861	1.04277
1008	18.19	27.17	47.06	38.14	27.89	tr|F1LMC3|F1LMC3_RAT	Calcium/calmodulin-dependent protein kinase type II subunit gamma OS=Rattus norvegicus GN=Camk2g PE=1 SV=3	RAT	19	1.21339	1.2942	1.20226	1.27057	0.0308449	1.24511
1009	18.19	23.47	44.31	33.28	26.55	tr|F1LT49|F1LT49_RAT	Protein Lrrc47 OS=Rattus norvegicus GN=Lrrc47 PE=1 SV=2	RAT	14	0.972747	0.972747	0.990832	0.990832	0.0092101	0.98179
1010	18.18	20.25	27.23	17.05	9.873	tr|A0A0G2JTN4|A0A0G2JTN4_RAT	Protein LOC100912917 OS=Rattus norvegicus GN=Pfas PE=1 SV=1	RAT	12	0.946237	0.963829	0.972747	0.990832	0.0166038	0.968411
1011	18.16	19.75	40.79	29.52	22.9	sp|P54645|AAPK1_RAT	5'-AMP-activated protein kinase catalytic subunit alpha-1 OS=Rattus norvegicus GN=Prkaa1 PE=1 SV=2	RAT	11	0.963829	0.937562	0.972747	0.946237	0.0145621	0.955094
1012	18.16	18.98	34.23	25.41	16.4	tr|A0A096MJY1|A0A096MJY1_RAT	Protein Gpc6 OS=Rattus norvegicus GN=Gpc6 PE=3 SV=1	RAT	12	0.887156	0.990832	0.862979	0.963829	0.0569132	0.926199
1013	18.14	19.07	78.88	71.43	68.32	tr|D3ZWT8|D3ZWT8_RAT	ATP synthase subunit d, mitochondrial OS=Rattus norvegicus GN=Atp5h PE=1 SV=3	RAT	18	1.03753	1.10662	0.704693	0.751623	0.193837	0.900117
1014	18.13	18.77	34.85	21.56	18.64	tr|B1H282|B1H282_RAT	Glycosyltransferase 25 domain containing 1 OS=Rattus norvegicus GN=Colgalt1 PE=1 SV=1	RAT	14	1.04713	1.19124	0.855067	0.981748	0.118926	1.0188
1015	18.11	23.94	42.77	33.72	26.97	tr|B2RYP4|B2RYP4_RAT	Protein Snx2 OS=Rattus norvegicus GN=Snx2 PE=1 SV=1	RAT	14	1.03753	0.990832	0.928966	0.887156	0.0598273	0.961121
1016	18.08	22.2	55.28	47.97	42.01	tr|D3ZT07|D3ZT07_RAT	Platelet glycoprotein Ib beta chain OS=Rattus norvegicus GN=Sept5 PE=1 SV=2	RAT	14	1.08643	1.10662	1.0666	1.08643	0.0130253	1.08652
1017	18.08	20.39	55.35	42.51	32.35	tr|Q6AYF8|Q6AYF8_RAT	Protein Serpinb9 OS=Rattus norvegicus GN=Serpinb9 PE=1 SV=1	RAT	10	1.02802	0.937562	1.04713	0.954993	0.0469337	0.991925
1018	18.08	19.07	30.77	22.41	14.38	tr|E9PSY8|E9PSY8_RAT	Protein Eps15 OS=Rattus norvegicus GN=Eps15 PE=1 SV=2	RAT	12	0.946237	0.946237	0.963829	0.963829	0.0092101	0.955033
1019	18.07	19.93	46.29	37.07	27.45	tr|B5DFL0|B5DFL0_RAT	Protein Snta1 OS=Rattus norvegicus GN=Snta1 PE=1 SV=1	RAT	16	1.01859	1.00925	0.972747	0.972747	0.0209904	0.993335
1020	18.07	18.71	41.96	30.79	25.61	sp|P19836|PCY1A_RAT	Choline-phosphate cytidylyltransferase A OS=Rattus norvegicus GN=Pcyt1a PE=1 SV=2	RAT	9	0.972747	1	0.946237	0.972747	0.0195378	0.972933
1021	18.06	20.15	39.11	36.87	33.24	tr|B0BNG3|B0BNG3_RAT	Lman2 protein OS=Rattus norvegicus GN=Lman2 PE=1 SV=1	RAT	15	0.963829	1.02802	0.954993	1.01859	0.0325528	0.991357
1022	18.05	22.06	71.09	64.84	64.84	tr|G3V6A9|G3V6A9_RAT	Protein LOC100911714 OS=Rattus norvegicus GN=LOC102553715 PE=1 SV=2	RAT	44	0.559758	0.77983	0.428549	0.60256	0.211995	0.592674
1023	18.05	18.15	38.5	33.96	31.28	sp|P12711|ADHX_RAT	Alcohol dehydrogenase class-3 OS=Rattus norvegicus GN=Adh5 PE=1 SV=2	RAT	13	1.10662	0.963829	0.92045	0.794328	0.11788	0.946308
1024	18.04	21.59	34.83	24.35	16.33	sp|P97852|DHB4_RAT	Peroxisomal multifunctional enzyme type 2 OS=Rattus norvegicus GN=Hsd17b4 PE=1 SV=3	RAT	14	1.08643	1.18032	0.937562	1.05682	0.0813835	1.06528
1025	18	20.82	29.94	22.92	15.33	sp|Q641Y5|ATG7_RAT	Ubiquitin-like modifier-activating enzyme ATG7 OS=Rattus norvegicus GN=Atg7 PE=2 SV=1	RAT	13	0.912011	1.1272	1.04713	1.28233	0.122735	1.09217
1026	18	18.14	65.26	58.22	45.54	tr|A0A0G2JSS8|A0A0G2JSS8_RAT	Peroxiredoxin 5, isoform CRA_c OS=Rattus norvegicus GN=Prdx5 PE=1 SV=1	RAT	11	0.809096	1.15878	0.772681	1.09648	0.177524	0.959258
1027	18	18.01	58.74	56.8	53.4	tr|B5DF65|B5DF65_RAT	Biliverdin reductase B (Flavin reductase (NADPH)) OS=Rattus norvegicus GN=Blvrb PE=1 SV=1	RAT	9	1.19124	1.05682	0.981748	0.870964	0.113593	1.02519
1028	17.98	19.84	47.57	38.05	34.51	sp|Q920A6|RISC_RAT	Retinoid-inducible serine carboxypeptidase OS=Rattus norvegicus GN=Scpep1 PE=2 SV=1	RAT	18	0.928966	0.928966	0.887156	0.887156	0.0230218	0.908061
1029	17.94	20.16	25.22	16.21	11.31	tr|F7F469|F7F469_RAT	Protein Igtp OS=Rattus norvegicus GN=Igtp PE=1 SV=2	RAT	15	0.549541	0.57544	0.744732	0.77983	0.152598	0.662386
1030	17.85	21.31	30.23	23.89	17.41	sp|Q5U367|PLOD3_RAT	Procollagen-lysine,2-oxoglutarate 5-dioxygenase 3 OS=Rattus norvegicus GN=Plod3 PE=2 SV=1	RAT	12	1.00925	1.04713	1.00925	1.03753	0.016458	1.02579
1031	17.85	19.38	39	31.58	27.03	tr|G3V8H7|G3V8H7_RAT	Olfactomedin-like 3 (Predicted) OS=Rattus norvegicus GN=Olfml3 PE=1 SV=1	RAT	12	0.912011	0.895365	0.751623	0.744732	0.0944576	0.825933
1032	17.82	19.53	63.41	52.37	43.22	sp|P19945|RLA0_RAT	60S acidic ribosomal protein P0 OS=Rattus norvegicus GN=Rplp0 PE=1 SV=2	RAT	18	0.928966	1.02802	0.895365	0.990832	0.0538688	0.960795
1033	17.78	20.21	36.56	25.59	23.66	tr|Q99ND8|Q99ND8_RAT	Ppm1b protein OS=Rattus norvegicus GN=Ppm1b PE=1 SV=1	RAT	12	0.912011	1.24738	0.855067	1.1695	0.158696	1.04599
1034	17.78	20.12	23.95	19.23	16.65	sp|Q9Z327|SYNPO_RAT	Synaptopodin OS=Rattus norvegicus GN=Synpo PE=1 SV=2	RAT	15	0.903649	0.912011	0.855067	0.862979	0.0280055	0.883426
1035	17.77	17.91	58.86	53.71	50.86	sp|P23928|CRYAB_RAT	Alpha-crystallin B chain OS=Rattus norvegicus GN=Cryab PE=1 SV=1	RAT	16	0.765597	0.895365	0.809096	0.946237	0.0828962	0.854074
1036	17.74	19.81	41.33	27.81	21.94	sp|G3V9D0|PGLT1_RAT	Protein O-glucosyltransferase 1 OS=Rattus norvegicus GN=Poglut1 PE=3 SV=1	RAT	12	0.990832	0.954993	1.01859	0.981748	0.0230251	0.986541
1037	17.72	18.39	35.38	27.05	19.13	tr|G3V982|G3V982_RAT	Engulfment and cell motility 2, ced-12 homolog (C. elegans), isoform CRA_b OS=Rattus norvegicus GN=Elmo2 PE=1 SV=1	RAT	13	0.972747	0.981748	0.937562	0.946237	0.0189858	0.959574
1038	17.71	19.91	26.41	14.98	7.46	tr|D3ZM20|D3ZM20_RAT	Kinesin-like protein OS=Rattus norvegicus GN=Kif13a PE=1 SV=1	RAT	14	0.937562	0.990832	0.981748	1.04713	0.0394093	0.989318
1039	17.69	20.44	29.39	23.64	19.33	tr|D3ZYV4|D3ZYV4_RAT	Protein Dmpk OS=Rattus norvegicus GN=Dmpk PE=4 SV=3	RAT	13	0.937562	0.990832	0.981748	1.02802	0.0326944	0.98454
1040	17.67	17.98	32.97	22.49	13.3	tr|F1LSL2|F1LSL2_RAT	Nuclear pore complex protein Nup107 OS=Rattus norvegicus GN=Nup107 PE=1 SV=2	RAT	13	1	0.928966	1.03753	0.972747	0.0402151	0.984811
1041	17.66	19.73	45.42	29.05	24.3	sp|Q5XI81|FXR1_RAT	Fragile X mental retardation syndrome-related protein 1 OS=Rattus norvegicus GN=Fxr1 PE=1 SV=1	RAT	13	0.912011	0.801678	1.15878	1.00925	0.135216	0.97043
1042	17.64	18.85	39.64	30.48	20.12	tr|A0A0G2JZH8|A0A0G2JZH8_RAT	Protein Pdhx OS=Rattus norvegicus GN=Pdhx PE=1 SV=1	RAT	9	0.990832	1.18032	0.963829	1.14815	0.0883704	1.07078
1043	17.64	18.07	54.05	47.57	35.92	sp|Q3KRD5|TOM34_RAT	Mitochondrial import receptor subunit TOM34 OS=Rattus norvegicus GN=Tomm34 PE=1 SV=1	RAT	9	1	1.05682	0.981748	1.03753	0.02912	1.01902
1044	17.64	17.93	29.82	18.18	13.94	tr|R9PXZ5|R9PXZ5_RAT	Sortilin OS=Rattus norvegicus GN=Sort1 PE=1 SV=2	RAT	13	0.937562	0.972747	0.946237	0.981748	0.0189858	0.959574
1045	17.59	18.1	61.98	47.91	34.98	sp|P18420|PSA1_RAT	Proteasome subunit alpha type-1 OS=Rattus norvegicus GN=Psma1 PE=1 SV=2	RAT	12	0.990832	1.03753	0.946237	0.990832	0.032562	0.991357
1046	17.54	24.6	48.03	36.85	28.99	tr|D3ZD73|D3ZD73_RAT	Protein Ddx6 OS=Rattus norvegicus GN=Ddx6 PE=1 SV=1	RAT	17	0.963829	0.981748	0.963829	0.972747	0.0076511	0.970538
1047	17.53	18.12	38.93	33.33	25.41	tr|G3V7P2|G3V7P2_RAT	Fibrinogen-like 2 OS=Rattus norvegicus GN=Fgl2 PE=1 SV=1	RAT	13	0.954993	0.717794	0.92045	0.698232	0.140616	0.822867
1048	17.51	24.43	26.73	19.82	11.81	tr|G3V8Q8|G3V8Q8_RAT	Protein Sec23ip OS=Rattus norvegicus GN=Sec23ip PE=1 SV=1	RAT	14	1	0.972747	1.03753	1	0.0229882	1.00257
1049	17.51	20.08	36.2	27.81	21.63	sp|P11883|AL3A1_RAT	Aldehyde dehydrogenase, dimeric NADP-preferring OS=Rattus norvegicus GN=Aldh3a1 PE=1 SV=3	RAT	13	1.6293	1.51356	1.38038	1.28233	0.0905828	1.45139
1050	17.49	20.79	44.3	36.69	25.28	tr|D3ZT90|D3ZT90_RAT	Glutaryl-Coenzyme A dehydrogenase (Predicted) OS=Rattus norvegicus GN=Gcdh PE=1 SV=1	RAT	14	0.636796	0.801678	0.765597	0.981748	0.154802	0.796455
1051	17.49	17.95	21.41	13.05	6.171	tr|A0A0G2K4G5|A0A0G2K4G5_RAT	Fibronectin type III domain-containing protein 1 OS=Rattus norvegicus GN=Fndc1 PE=1 SV=1	RAT	12	0.42462	0.524807	0.77983	0.946237	0.307902	0.668874
1052	17.49	17.92	48.75	33.75	28.75	sp|P36506|MP2K2_RAT	Dual specificity mitogen-activated protein kinase kinase 2 OS=Rattus norvegicus GN=Map2k2 PE=1 SV=1	RAT	10	0.972747	1.04713	0.92045	0.990832	0.0460454	0.982789
1053	17.43	17.65	27.17	23.4	21.89	tr|B5DEZ8|B5DEZ8_RAT	Plexin domain containing 2 OS=Rattus norvegicus GN=Plxdc2 PE=1 SV=1	RAT	16	0.954993	0.972747	0.946237	0.954993	0.0100695	0.957242
1054	17.42	27.73	20.1	9.533	3.607	tr|F1LM42|F1LM42_RAT	Protein Ank2 OS=Rattus norvegicus GN=Ank2 PE=1 SV=2	RAT	17	0.895365	1.0666	1.01859	1.20226	0.105067	1.0457
1055	17.4	18.7	38.68	32.11	26.32	tr|O88321|O88321_RAT	Antisecretory factor OS=Rattus norvegicus GN=Psmd4 PE=1 SV=1	RAT	12	1	1	0.954993	0.954993	0.0230218	0.977496
1056	17.4	17.73	61.39	54.44	46.33	sp|A0JPM9|EIF3J_RAT	Eukaryotic translation initiation factor 3 subunit J OS=Rattus norvegicus GN=Eif3j PE=1 SV=1	RAT	11	1.03753	1.02802	1.00925	0.990832	0.017642	1.01641
1057	17.39	22.61	51.99	40.05	33.69	tr|F1LNG7|F1LNG7_RAT	Guanine nucleotide-binding protein subunit alpha-13 OS=Rattus norvegicus GN=Gna13 PE=1 SV=3	RAT	15	1.1272	0.981748	0.937562	0.816582	0.11503	0.965772
1058	17.37	19.17	63.77	63.04	46.01	sp|Q497B0|NIT2_RAT	Omega-amidase NIT2 OS=Rattus norvegicus GN=Nit2 PE=1 SV=1	RAT	13	0.801678	0.816582	0.794328	0.809096	0.0102973	0.805421
1059	17.34	17.84	70.68	54.22	38.96	tr|Q6P9V7|Q6P9V7_RAT	Proteasome (Prosome, macropain) activator subunit 1 OS=Rattus norvegicus GN=Psme1 PE=1 SV=1	RAT	15	1.02802	0.903649	0.937562	0.816582	0.0821674	0.921453
1060	17.32	22.02	36.99	28.57	26.28	tr|B2RYP6|B2RYP6_RAT	LUC7-like 2 (S. cerevisiae) OS=Rattus norvegicus GN=Luc7l2 PE=1 SV=1	RAT	13	0.83946	0.895365	0.77983	0.824138	0.0494876	0.834698
1061	17.32	18.75	59.35	50.47	42.52	sp|Q6PDV7|RL10_RAT	60S ribosomal protein L10 OS=Rattus norvegicus GN=Rpl10 PE=1 SV=3	RAT	11	1.7378	1.23595	1.59956	1.1272	0.176382	1.42513
1062	17.31	18.91	44.62	32.88	24.27	sp|P62815|VATB2_RAT	V-type proton ATPase subunit B, brain isoform OS=Rattus norvegicus GN=Atp6v1b2 PE=1 SV=1	RAT	11	0.972747	1.02802	0.937562	1	0.0339723	0.984581
1063	17.28	21.28	46.31	35.22	25.62	tr|B5DEY8|B5DEY8_RAT	Protein Snx6 OS=Rattus norvegicus GN=Snx6 PE=1 SV=1	RAT	12	0.963829	0.981748	0.928966	0.954993	0.0198761	0.957384
1064	17.27	17.38	42.77	28.17	19.32	sp|P00388|NCPR_RAT	NADPH--cytochrome P450 reductase OS=Rattus norvegicus GN=Por PE=1 SV=3	RAT	10	0.928966	0.963829	0.981748	1.00925	0.030014	0.970949
1065	17.25	21.19	39.09	31.18	25.18	tr|Q5M9F7|Q5M9F7_RAT	ARP10 actin-related protein 10 homolog (S. cerevisiae) OS=Rattus norvegicus GN=Actr10 PE=1 SV=1	RAT	13	0.972747	0.990832	0.963829	0.981748	0.0102973	0.977289
1066	17.24	19.19	37.5	29.25	26.25	tr|A0A0G2K9P4|A0A0G2K9P4_RAT	Endophilin-B2 OS=Rattus norvegicus GN=Sh3glb2 PE=1 SV=1	RAT	13	0.963829	0.963829	0.937562	0.946237	0.0119489	0.952864
1067	17.21	17.57	28.75	20.07	11.27	sp|O88763|PK3C3_RAT	Phosphatidylinositol 3-kinase catalytic subunit type 3 OS=Rattus norvegicus GN=Pik3c3 PE=1 SV=1	RAT	11	0.990832	0.937562	1.05682	1	0.0424539	0.996303
1068	17.2	17.53	73.08	63.46	58.65	sp|P36201|CRIP2_RAT	Cysteine-rich protein 2 OS=Rattus norvegicus GN=Crip2 PE=2 SV=1	RAT	27	0.613762	0.794328	0.398107	0.519996	0.248819	0.581548
1069	17.17	22.84	45.68	34.32	28.64	sp|P62193|PRS4_RAT	26S protease regulatory subunit 4 OS=Rattus norvegicus GN=Psmc1 PE=2 SV=1	RAT	14	0.946237	0.963829	0.937562	0.946237	0.0100695	0.948466
1070	17.17	19.6	32.85	27.2	20.5	tr|Q3KR94|Q3KR94_RAT	Protein Vtn OS=Rattus norvegicus GN=Vtn PE=1 SV=1	RAT	13	0.981748	0.972747	1.05682	1.04713	0.0371119	1.01461
1071	17.16	18.5	32.99	30.46	19.63	tr|D4A3E1|D4A3E1_RAT	Protein Hnrnpll OS=Rattus norvegicus GN=Hnrnpll PE=1 SV=1	RAT	11	1	1.07647	0.809096	0.870964	0.111833	0.939131
1072	17.14	17.41	53.08	39.88	21.11	tr|A0A0G2JZH0|A0A0G2JZH0_RAT	Protein Cab39 OS=Rattus norvegicus GN=Cab39 PE=1 SV=1	RAT	10	1.11686	1.1272	0.912011	0.912011	0.103315	1.01702
1073	17.13	21.98	32.35	23.17	16.39	tr|A0A0G2K016|A0A0G2K016_RAT	Protein Sun1 OS=Rattus norvegicus GN=Sun1 PE=1 SV=1	RAT	13	1.03753	0.990832	1.03753	0.990832	0.0230218	1.01418
1074	17.13	18.76	62.25	51.96	45.1	sp|Q5XI73|GDIR1_RAT	Rho GDP-dissociation inhibitor 1 OS=Rattus norvegicus GN=Arhgdia PE=1 SV=1	RAT	15	1.08643	1.1695	0.895365	0.972747	0.101778	1.03101
1075	17.13	17.28	55.67	44.33	33.68	sp|P17988|ST1A1_RAT	Sulfotransferase 1A1 OS=Rattus norvegicus GN=Sult1a1 PE=1 SV=1	RAT	10	1.05682	0.758578	0.870964	0.625173	0.19114	0.827883
1076	17.11	19	30.53	23.98	21.11	tr|A0A096MJ11|A0A096MJ11_RAT	Gasdermin domain containing 1 (Predicted), isoform CRA_a OS=Rattus norvegicus GN=Gsdmd PE=1 SV=1	RAT	12	0.963829	1.00925	0.92045	0.963829	0.032562	0.96434
1077	17.11	17.28	29.78	24.01	18.05	sp|P10960|SAP_RAT	Sulfated glycoprotein 1 OS=Rattus norvegicus GN=Psap PE=1 SV=1	RAT	12	1.01859	0.928966	1.59956	1.41906	0.223175	1.24154
1078	17.1	17.24	30.93	28.09	25	sp|P84586|RMXRL_RAT	RNA-binding motif protein, X chromosome retrogene-like OS=Rattus norvegicus GN=Rbmxrtl PE=1 SV=1	RAT	11	0.895365	0.92045	0.831764	0.855067	0.039334	0.875661
1079	17.08	22.2	30.55	20.09	14.55	tr|D4A9H6|D4A9H6_RAT	Protein St5 OS=Rattus norvegicus GN=St5 PE=1 SV=1	RAT	14	0.937562	1	0.954993	1.00925	0.0307522	0.975452
1080	17.05	19.79	67.7	52.65	50	tr|B6DYQ0|B6DYQ0_RAT	Glutathione S-transferase kappa OS=Rattus norvegicus GN=Gstk1 PE=1 SV=1	RAT	10	1.00925	1	0.990832	0.990832	0.00765111	0.997729
1081	17.05	18.67	37.94	31.8	16.89	tr|Q5U2T9|Q5U2T9_RAT	FK506 binding protein 5 OS=Rattus norvegicus GN=Fkbp5 PE=1 SV=1	RAT	8	0.990832	1.01859	0.963829	1	0.0198761	0.993313
1082	17.05	17.12	38.51	31.95	27.79	tr|G3V827|G3V827_RAT	Cysteine conjugate-beta lyase 1, isoform CRA_a OS=Rattus norvegicus GN=Ccbl1 PE=1 SV=1	RAT	10	0.831764	0.831764	0.912011	0.912011	0.0460192	0.871887
1083	17.04	23.53	74.61	67.88	56.99	tr|G3V9V9|G3V9V9_RAT	Cysteine and glycine-rich protein 2 OS=Rattus norvegicus GN=Csrp2 PE=1 SV=1	RAT	20	0.946237	1.34276	0.816582	1.19124	0.191104	1.07421
1084	17.03	18.52	18.68	13.04	8.213	tr|D3ZW15|D3ZW15_RAT	Protein Sec24b OS=Rattus norvegicus GN=Sec24b PE=1 SV=1	RAT	10	1.40605	1.1272	1.10662	0.895365	0.16007	1.13381
1085	17.02	17.56	66.67	63.13	56.06	tr|Q6AY18|Q6AY18_RAT	Protein Sar1a OS=Rattus norvegicus GN=Sar1a PE=1 SV=1	RAT	12	0.990832	1.04713	0.972747	1.02802	0.02912	1.00968
1086	16.98	17.44	40.58	29.84	24.61	tr|G3V7G9|G3V7G9_RAT	Eukaryotic translation initiation factor 3, subunit 6 interacting protein OS=Rattus norvegicus GN=Eif3l PE=1 SV=2	RAT	15	0.990832	1	1	1.01859	0.0100695	1.00236
1087	16.96	19.84	71.58	64.91	40.35	sp|O08557|DDAH1_RAT	N(G),N(G)-dimethylarginine dimethylaminohydrolase 1 OS=Rattus norvegicus GN=Ddah1 PE=1 SV=3	RAT	14	0.724436	0.92045	0.711214	0.903649	0.119526	0.814937
1088	16.96	18.78	44.27	39.44	32.57	tr|G3V8U8|G3V8U8_RAT	Branched-chain-amino-acid aminotransferase OS=Rattus norvegicus GN=Bcat2 PE=1 SV=1	RAT	15	0.981748	0.954993	0.946237	0.92045	0.0230251	0.950857
1089	16.94	17.06	47.91	46.05	38.6	tr|F1MA29|F1MA29_RAT	Protein LOC681718 OS=Rattus norvegicus GN=LOC681718 PE=4 SV=1	RAT	12	0.912011	0.879023	0.711214	0.691831	0.122647	0.798519
1090	16.92	19.29	50.5	43.23	38.61	sp|Q5U2U2|CRKL_RAT	Crk-like protein OS=Rattus norvegicus GN=Crkl PE=1 SV=1	RAT	12	0.990832	1	0.972747	0.972747	0.0119795	0.984082
1091	16.92	17.07	45.68	38.38	33.78	tr|B0K017|B0K017_RAT	ADP-ribosylhydrolase like 2 OS=Rattus norvegicus GN=Adprhl2 PE=1 SV=1	RAT	12	1.05682	1.19124	0.903649	1.00925	0.0993156	1.04024
1092	16.91	17.22	31.33	27.02	22.72	sp|Q9Z1W6|LYRIC_RAT	Protein LYRIC OS=Rattus norvegicus GN=Mtdh PE=1 SV=2	RAT	10	0.990832	1.00925	0.963829	0.990832	0.0163878	0.988686
1093	16.89	17.17	61.01	57.4	50.18	tr|A0A0G2K478|A0A0G2K478_RAT	Deoxyguanosine kinase (Predicted), isoform CRA_b OS=Rattus norvegicus GN=Dguok PE=1 SV=1	RAT	14	1	0.963829	0.972747	0.937562	0.0230251	0.968535
1094	16.89	17.08	57.69	57.31	52.31	sp|P14141|CAH3_RAT	Carbonic anhydrase 3 OS=Rattus norvegicus GN=Ca3 PE=1 SV=3	RAT	17	1.48594	1.57036	1.35519	1.41906	0.0547673	1.45764
1095	16.85	19.7	28.13	22.19	15.94	tr|Q505I9|Q505I9_RAT	Epsin 2 OS=Rattus norvegicus GN=Epn2 PE=1 SV=1	RAT	16	0.954993	0.963829	0.92045	0.92045	0.0209904	0.93993
1096	16.84	19.57	62.79	50	40.31	tr|A0A0G2K738|A0A0G2K738_RAT	Ras-related protein Rab-34 OS=Rattus norvegicus GN=Rab34 PE=1 SV=1	RAT	13	1.00925	1.05682	0.963829	1.01859	0.0326944	1.01212
1097	16.84	17.05	34.8	23.25	18.05	tr|D3ZZ38|D3ZZ38_RAT	Sorting nexin OS=Rattus norvegicus GN=Snx18 PE=1 SV=1	RAT	12	1	1.02802	0.895365	0.92045	0.0569132	0.960958
1098	16.81	20.61	38.56	31.15	23.97	tr|M0R402|M0R402_RAT	Protein Tmx3 OS=Rattus norvegicus GN=Tmx3 PE=1 SV=2	RAT	14	0.928966	0.954993	0.981748	1	0.0278416	0.966427
1099	16.8	19.01	82.57	61.41	55.6	sp|Q6MG61|CLIC1_RAT	Chloride intracellular channel protein 1 OS=Rattus norvegicus GN=Clic1 PE=1 SV=1	RAT	12	0.946237	0.937562	1.03753	1.03753	0.0484106	0.989714
1100	16.8	18.95	41.83	32.35	30.72	sp|Q62632|FSTL1_RAT	Follistatin-related protein 1 OS=Rattus norvegicus GN=Fstl1 PE=1 SV=1	RAT	10	0.990832	0.912011	1.13763	1.04713	0.080502	1.0219
1101	16.8	17.18	17.31	9.44	5.654	tr|D3ZN95|D3ZN95_RAT	Protein Hcfc1 OS=Rattus norvegicus GN=Hcfc1 PE=1 SV=1	RAT	11	0.928966	0.972747	0.903649	0.946237	0.0268505	0.9379
1102	16.76	20.04	45.17	31.21	24.64	tr|A0A0G2JW80|A0A0G2JW80_RAT	COP9 signalosome complex subunit 1 OS=Rattus norvegicus GN=Gps1 PE=1 SV=1	RAT	11	1.44544	1.24738	1.23595	1.04713	0.113267	1.24397
1103	16.74	25.28	31.42	19.83	13.97	sp|O54924|EXOC8_RAT	Exocyst complex component 8 OS=Rattus norvegicus GN=Exoc8 PE=1 SV=1	RAT	14	0.972747	0.981748	0.963829	0.963829	0.0076511	0.970538
1104	16.74	16.83	61.09	40.73	38.6	sp|P20762|IGG2C_RAT	Ig gamma-2C chain C region OS=Rattus norvegicus PE=2 SV=1	RAT	11	2.18776	0.164437	6.42688	0.452898	1.08354	2.30799
1105	16.73	22.89	28.65	18.86	10.67	tr|E9PT22|E9PT22_RAT	Protein Inf2 OS=Rattus norvegicus GN=Inf2 PE=1 SV=3	RAT	12	1.35519	1.18032	1.22462	1.07647	0.0827061	1.20915
1106	16.73	17.62	59.61	40.78	39.22	sp|P18422|PSA3_RAT	Proteasome subunit alpha type-3 OS=Rattus norvegicus GN=Psma3 PE=1 SV=3	RAT	13	1.00925	0.990832	0.972747	0.954993	0.0205937	0.981956
1107	16.72	17.08	78.31	65.06	57.43	sp|P48500|TPIS_RAT	Triosephosphate isomerase OS=Rattus norvegicus GN=Tpi1 PE=1 SV=2	RAT	15	1.23595	1.1695	1.1695	1.11686	0.0360151	1.17295
1108	16.69	19.4	35.2	26.81	19.9	tr|F1LQX9|F1LQX9_RAT	Nuclear protein localization protein 4 homolog OS=Rattus norvegicus GN=Nploc4 PE=1 SV=3	RAT	12	0.946237	1.02802	1	1.08643	0.0498021	1.01517
1109	16.68	17.59	38.93	31.7	21.91	sp|Q6AY30|SCPDL_RAT	Saccharopine dehydrogenase-like oxidoreductase OS=Rattus norvegicus GN=Sccpdh PE=1 SV=1	RAT	10	0.972747	0.954993	0.954993	0.946237	0.0100695	0.957242
1110	16.68	17.23	50.42	46.78	29.69	sp|P27867|DHSO_RAT	Sorbitol dehydrogenase OS=Rattus norvegicus GN=Sord PE=1 SV=4	RAT	11	0.946237	1.14815	0.731139	0.887156	0.160909	0.928171
1111	16.67	20.88	29.49	21.05	12.6	tr|Q1KQ07|Q1KQ07_RAT	Signal transducer and activator of transcription OS=Rattus norvegicus GN=Stat6 PE=1 SV=1	RAT	10	1.47231	1.40605	1.10662	1.05682	0.143692	1.26045
1112	16.67	17.23	37.12	29.55	26.01	tr|Q5RJK6|Q5RJK6_RAT	Inositol polyphosphate-1-phosphatase OS=Rattus norvegicus GN=Inpp1 PE=1 SV=1	RAT	13	1.01859	0.972747	0.990832	0.954993	0.0238856	0.984291
1113	16.66	20.39	46.61	38.7	33.62	sp|Q6AXM8|PON2_RAT	Serum paraoxonase/arylesterase 2 OS=Rattus norvegicus GN=Pon2 PE=2 SV=1	RAT	14	0.963829	1.14815	0.912011	1.08643	0.0915747	1.0276
1114	16.66	17.4	83.42	78.07	72.73	sp|P31044|PEBP1_RAT	Phosphatidylethanolamine-binding protein 1 OS=Rattus norvegicus GN=Pebp1 PE=1 SV=3	RAT	26	0.981748	1.23595	0.855067	1.08643	0.134422	1.0398
1115	16.65	16.97	32.74	25.64	21.3	tr|B5DEH4|B5DEH4_RAT	Protein Uap1l1 OS=Rattus norvegicus GN=Uap1l1 PE=1 SV=1	RAT	10	1.01859	0.937562	1.08643	1	0.0524984	1.01064
1116	16.63	17.16	49.1	38.11	29.67	sp|P19139|CSK21_RAT	Casein kinase II subunit alpha OS=Rattus norvegicus GN=Csnk2a1 PE=1 SV=2	RAT	10	0.972747	0.972747	0.928966	0.928966	0.0230218	0.950857
1117	16.62	17.11	61.06	56.25	49.52	tr|B2RYR8|B2RYR8_RAT	40S ribosomal protein S8 OS=Rattus norvegicus GN=Rps8 PE=2 SV=1	RAT	16	1.02802	1.00925	1.02802	1.00925	0.00921009	1.01863
1118	16.62	16.82	42.96	38.14	34.71	tr|G3V8D5|G3V8D5_RAT	6-phosphogluconolactonase OS=Rattus norvegicus GN=Pgls PE=1 SV=1	RAT	10	1.02802	1.04713	1.00925	1.02802	0.0130253	1.0281
1119	16.61	17.05	54.09	49.11	40.93	tr|F1M9B2|F1M9B2_RAT	Insulin-like growth factor binding protein 7, isoform CRA_b OS=Rattus norvegicus GN=Igfbp7 PE=1 SV=2	RAT	12	0.47863	1.02802	0.724436	1.58489	0.432887	0.953994
1120	16.58	18.73	66.98	57.67	57.67	tr|B0BMW0|B0BMW0_RAT	RAB14, member RAS oncogene family OS=Rattus norvegicus GN=Rab14 PE=1 SV=1	RAT	12	0.887156	1.0666	0.912011	1.10662	0.0956457	0.993097
1121	16.57	17.18	45.89	37.67	32.88	sp|P13084|NPM_RAT	Nucleophosmin OS=Rattus norvegicus GN=Npm1 PE=1 SV=1	RAT	14	1.02802	0.895365	0.831764	0.724436	0.126273	0.869895
1122	16.57	17.14	31.6	19.14	12.35	tr|A0A0G2JYR1|A0A0G2JYR1_RAT	Protein Exoc6b OS=Rattus norvegicus GN=Exoc6b PE=1 SV=1	RAT	12	0.946237	0.981748	1.00925	1.04713	0.0371221	0.996092
1123	16.57	16.79	29.81	16.59	11.48	tr|A0A0G2QC21|A0A0G2QC21_RAT	Rho guanine nucleotide exchange factor 7 OS=Rattus norvegicus GN=Arhgef7 PE=1 SV=1	RAT	9	0.990832	0.963829	0.981748	0.954993	0.0145621	0.97285
1124	16.54	21.81	26.94	16.51	9.469	tr|D3ZL50|D3ZL50_RAT	Protein Ttc37 OS=Rattus norvegicus GN=Ttc37 PE=1 SV=3	RAT	19	0.981748	1.03753	1.00925	1.0666	0.0308881	1.02378
1125	16.54	16.82	39.84	31.71	22.22	sp|Q8VHT6|AS3MT_RAT	Arsenite methyltransferase OS=Rattus norvegicus GN=As3mt PE=1 SV=1	RAT	8	0.946237	0.937562	1.01859	1	0.0353321	0.975598
1126	16.52	16.96	44.31	33.94	23.58	tr|A0A0G2K9E0|A0A0G2K9E0_RAT	Ribonuclease inhibitor OS=Rattus norvegicus GN=Rnh1 PE=1 SV=1	RAT	11	0.92045	1.08643	1	1.19124	0.0959437	1.04953
1127	16.5	16.8	52.08	41.67	34.52	sp|B0BN85|SGT1_RAT	Protein SGT1 homolog OS=Rattus norvegicus GN=Sugt1 PE=2 SV=1	RAT	9	1.1272	1.58489	0.801678	1.07647	0.245069	1.14756
1128	16.47	18.8	40.09	34.03	32.17	tr|Q4KM87|Q4KM87_RAT	Actin-like 6A OS=Rattus norvegicus GN=Actl6a PE=1 SV=1	RAT	13	0.954993	0.946237	0.990832	0.981748	0.0189858	0.968452
1129	16.47	16.82	36.95	21.34	10.49	tr|Q712J3|Q712J3_RAT	Bicaudal D homolog 2 (Drosophila), isoform CRA_a OS=Rattus norvegicus GN=Bicd2 PE=1 SV=1	RAT	9	1.01859	1.04713	1.11686	1.14815	0.0480522	1.08268
1130	16.46	16.71	53.31	40.91	33.88	tr|B5DF46|B5DF46_RAT	Phosphomannomutase OS=Rattus norvegicus GN=Pmm2 PE=1 SV=1	RAT	9	1	1.21339	0.765597	0.937562	0.163598	0.979137
1131	16.45	22.03	52.4	42.8	36.53	tr|R9PY07|R9PY07_RAT	Phosphatidylinositol transfer protein beta isoform OS=Rattus norvegicus GN=Pitpnb PE=1 SV=2	RAT	11	0.937562	1	0.895365	0.954993	0.0396107	0.94698
1132	16.45	17.9	32.62	21.47	9.777	sp|A1A5S1|PRP6_RAT	Pre-mRNA-processing factor 6 OS=Rattus norvegicus GN=Prpf6 PE=1 SV=1	RAT	10	0.963829	0.92045	0.937562	0.895365	0.0268505	0.929301
1133	16.45	17.37	40.87	33.27	24.52	tr|A0A0G2K756|A0A0G2K756_RAT	Acyl-Coenzyme A binding domain containing 3 OS=Rattus norvegicus GN=Acbd3 PE=1 SV=1	RAT	11	0.972747	0.981748	0.963829	0.972747	0.00651267	0.972768
1134	16.44	18.47	36.18	31.91	26.88	tr|Q0D2L6|Q0D2L6_RAT	Protein Rragc OS=Rattus norvegicus GN=Rragc PE=1 SV=1	RAT	11	0.870964	0.801678	0.981748	0.912011	0.0732363	0.8916
1135	16.43	17.94	36.11	34.17	27.5	tr|A0A0H2UHE1|A0A0H2UHE1_RAT	Succinate-CoA ligase, GDP-forming, alpha subunit, isoform CRA_b OS=Rattus norvegicus GN=Suclg1 PE=1 SV=1	RAT	15	1.1272	1.11686	1.02802	1.00925	0.0488163	1.07033
1136	16.39	17.07	48.22	34.2	28.03	sp|P08503|ACADM_RAT	Medium-chain specific acyl-CoA dehydrogenase, mitochondrial OS=Rattus norvegicus GN=Acadm PE=1 SV=1	RAT	12	1.0666	1.08643	1.04713	1.0666	0.0130253	1.06669
1137	16.39	16.56	60.07	45.52	36.94	sp|Q66HR2|MARE1_RAT	Microtubule-associated protein RP/EB family member 1 OS=Rattus norvegicus GN=Mapre1 PE=1 SV=3	RAT	9	1	1	1.00925	1.00925	0.00460515	1.00463
1138	16.38	23.18	57.37	48.95	37.63	sp|P21708|MK03_RAT	Mitogen-activated protein kinase 3 OS=Rattus norvegicus GN=Mapk3 PE=1 SV=5	RAT	13	1	1.0666	0.903649	0.963829	0.0600237	0.983519
1139	16.38	17.15	23.84	15.43	10.6	sp|Q62865|PDE3A_RAT	cGMP-inhibited 3',5'-cyclic phosphodiesterase A OS=Rattus norvegicus GN=Pde3a PE=1 SV=1	RAT	12	0.972747	0.963829	0.990832	0.990832	0.0119488	0.97956
1140	16.37	16.63	36.81	20.6	13.05	tr|D3ZQ74|D3ZQ74_RAT	Procollagen-lysine, 2-oxoglutarate 5-dioxygenase 1 OS=Rattus norvegicus GN=Plod1 PE=1 SV=2	RAT	8	0.954993	0.946237	1	0.990832	0.0234781	0.973015
1141	16.34	17.59	29.41	25.18	19.53	tr|B5DFB2|B5DFB2_RAT	Protein Rbbp4 OS=Rattus norvegicus GN=Rbbp4 PE=1 SV=1	RAT	11	1	0.879023	1.00925	0.887156	0.0645484	0.943858
1142	16.34	16.65	36.55	23.01	15.06	tr|D4AEI5|D4AEI5_RAT	Protein Myef2 OS=Rattus norvegicus GN=Myef2 PE=1 SV=1	RAT	10	0.990832	0.954993	0.981748	0.946237	0.0189858	0.968452
1143	16.32	20.34	69.68	58.12	48.01	sp|P47727|CBR1_RAT	Carbonyl reductase [NADPH] 1 OS=Rattus norvegicus GN=Cbr1 PE=1 SV=2	RAT	14	1.61436	1.27057	1.00925	0.77983	0.265722	1.1685
1144	16.32	16.85	56.56	50.82	34.84	tr|Q1RP74|Q1RP74_RAT	Protein LOC100911774 OS=Rattus norvegicus GN=LOC103690005 PE=1 SV=1	RAT	9	1.18032	1.07647	1.01859	0.937562	0.0839488	1.05323
1145	16.31	16.42	73.57	64.76	49.34	sp|P22062|PIMT_RAT	Protein-L-isoaspartate(D-aspartate) O-methyltransferase OS=Rattus norvegicus GN=Pcmt1 PE=1 SV=2	RAT	10	1	1.03753	0.887156	0.928966	0.0610411	0.963413
1146	16.3	19.44	52.6	39.05	27.99	sp|P61203|CSN2_RAT	COP9 signalosome complex subunit 2 OS=Rattus norvegicus GN=Cops2 PE=1 SV=1	RAT	12	1.01859	0.990832	0.870964	0.83946	0.0819494	0.929962
1147	16.26	16.71	45.18	34.88	28.24	tr|Q66HP8|Q66HP8_RAT	Mitochondrial carnitine/acylcarnitine carrier protein OS=Rattus norvegicus GN=Slc25a20 PE=1 SV=1	RAT	9	0.981748	1.1695	0.946237	1.11686	0.0876662	1.05359
1148	16.25	36.37	72.48	58.61	53.24	sp|P50398|GDIA_RAT	Rab GDP dissociation inhibitor alpha OS=Rattus norvegicus GN=Gdi1 PE=1 SV=1	RAT	46	0.963829	0.963829	0.990832	1	0.016458	0.979623
1149	16.25	18.48	30.76	21.24	16.34	sp|Q4V8C2|ZW10_RAT	Centromere/kinetochore protein zw10 homolog OS=Rattus norvegicus GN=Zw10 PE=2 SV=3	RAT	12	0.954993	0.981748	0.928966	0.954993	0.0195378	0.955175
1150	16.24	17.38	51.81	43.98	42.47	tr|G3V6S1|G3V6S1_RAT	PRKC apoptosis WT1 regulator protein OS=Rattus norvegicus GN=Pawr PE=1 SV=1	RAT	14	0.731139	0.37325	0.731139	0.37325	0.32406	0.552195
1151	16.23	22.25	26.22	14.64	8.073	tr|A0A0G2KA11|A0A0G2KA11_RAT	Protein Prex2 OS=Rattus norvegicus GN=Prex2 PE=1 SV=1	RAT	16	1.05682	1.1695	1.1272	1.25893	0.0634453	1.15311
1152	16.23	17.2	47.34	40.44	40.44	sp|Q5M876|ACY3_RAT	N-acyl-aromatic-L-amino acid amidohydrolase (carboxylate-forming) OS=Rattus norvegicus GN=Acy3 PE=1 SV=1	RAT	10	1.00925	1.05682	0.954993	1	0.0359652	1.00527
1153	16.22	17.18	30.63	20.63	12.66	sp|Q56A27|NCBP1_RAT	Nuclear cap-binding protein subunit 1 OS=Rattus norvegicus GN=Ncbp1 PE=1 SV=1	RAT	10	0.981748	0.981748	0.990832	1	0.00765113	0.988582
1154	16.21	17.42	57.09	42.56	36.68	tr|F1LYS7|F1LYS7_RAT	Protein Sgcd OS=Rattus norvegicus GN=Sgcd PE=4 SV=3	RAT	13	1	1.03753	0.972747	1.01859	0.0237473	1.00722
1155	16.17	17.72	43.68	32.12	25.91	tr|Q4V8N0|Q4V8N0_RAT	Lipocalin 7, isoform CRA_a OS=Rattus norvegicus GN=Tinagl1 PE=1 SV=1	RAT	20	1.01859	0.895365	1.00925	0.887156	0.0645484	0.952591
1156	16.16	16.31	50.48	42.17	33.87	tr|F1LU48|F1LU48_RAT	Protein Ergic1 OS=Rattus norvegicus GN=Ergic1 PE=1 SV=2	RAT	10	1	1.07647	0.912011	0.981748	0.0589635	0.992556
1157	16.14	18.35	49.85	45.2	31.58	tr|B2GUW1|B2GUW1_RAT	Frizzled-related protein OS=Rattus norvegicus GN=Frzb PE=2 SV=1	RAT	17	0.937562	0.855067	0.862979	0.787046	0.0619455	0.860663
1158	16.13	18.7	31.79	23.21	19.36	tr|G3V6L8|G3V6L8_RAT	RCG61894, isoform CRA_a OS=Rattus norvegicus GN=Strn PE=1 SV=1	RAT	13	1.05682	1.05682	0.972747	0.981748	0.0392436	1.01703
1159	16.13	17.17	52.19	38.44	34.69	tr|D4AEH3|D4AEH3_RAT	Proteasome (Prosome, macropain) 26S subunit, non-ATPase, 7 (Predicted) OS=Rattus norvegicus GN=Psmd7 PE=1 SV=1	RAT	12	1.08643	1	0.937562	0.862979	0.0844671	0.971742
1160	16.11	18.62	33.33	24.02	18.43	sp|Q5U2X6|CCD47_RAT	Coiled-coil domain-containing protein 47 OS=Rattus norvegicus GN=Ccdc47 PE=2 SV=1	RAT	10	1.02802	1.18032	0.972747	1.10662	0.0733348	1.07193
1161	16.09	19.39	58.47	43.55	39.52	tr|D4A9L2|D4A9L2_RAT	Protein Srsf1 OS=Rattus norvegicus GN=Srsf1 PE=1 SV=1	RAT	10	0.972747	0.990832	0.946237	0.963829	0.0166038	0.968411
1162	16.07	16.37	46.01	37.73	33.44	tr|B5DF91|B5DF91_RAT	ELAV-like protein OS=Rattus norvegicus GN=Elavl1 PE=1 SV=1	RAT	10	1.00925	0.990832	0.990832	0.981748	0.0100695	0.993166
1163	16.03	20.1	36.84	25.9	22.58	sp|A2VD12|PBIP1_RAT	Pre-B-cell leukemia transcription factor-interacting protein 1 OS=Rattus norvegicus GN=Pbxip1 PE=1 SV=1	RAT	18	1.04713	1.01859	0.990832	0.972747	0.0279859	1.00732
1164	16.03	18.88	44	38.33	36.67	tr|A0A0G2K7B3|A0A0G2K7B3_RAT	Heterogeneous nuclear ribonucleoprotein C OS=Rattus norvegicus GN=LOC100911576 PE=1 SV=1	RAT	13	0.981748	0.954993	0.946237	0.912011	0.0262656	0.948747
1165	16.02	43.09	72.48	68.23	64.21	tr|Q4QQV0|Q4QQV0_RAT	Protein Tubb6 OS=Rattus norvegicus GN=Tubb6 PE=1 SV=1	RAT	52	0.49204	0.744732	0.501187	0.765597	0.206948	0.625889
1166	16.02	16.17	36.13	28.08	18.49	tr|D3ZJH9|D3ZJH9_RAT	Malic enzyme OS=Rattus norvegicus GN=Me2 PE=1 SV=1	RAT	10	0.981748	0.990832	1	1.00925	0.0102973	0.995458
1167	16.01	21.11	21.99	12.29	6.763	tr|M0RB22|M0RB22_RAT	Protein Ptprd OS=Rattus norvegicus GN=Ptprd PE=1 SV=2	RAT	12	0.981748	1.00925	0.928966	0.946237	0.0322212	0.966551
1168	16	16.57	54.3	48.42	43.89	tr|A0A0H2UHM0|A0A0H2UHM0_RAT	Vacuolar protein sorting 28 (Yeast) (Predicted), isoform CRA_c OS=Rattus norvegicus GN=Vps28 PE=1 SV=1	RAT	9	1.30617	1.61436	1.5417	1.8197	0.116858	1.57048
1169	16	16.08	42.9	28.69	22.68	tr|Q6MGB8|Q6MGB8_RAT	Protein RT1-A OS=Rattus norvegicus GN=RT1-A2 PE=1 SV=1	RAT	8	0.954993	0.912011	1.01859	0.972747	0.0396107	0.964586
1170	15.98	18.87	42.44	34.88	31.4	tr|D3ZI16|D3ZI16_RAT	COP9 (Constitutive photomorphogenic) homolog, subunit 6 (Arabidopsis thaliana) (Predicted), isoform CRA_a OS=Rattus norvegicus GN=Cops6 PE=1 SV=1	RAT	13	0.963829	1.00925	0.954993	1	0.0234781	0.982019
1171	15.98	17.64	41.18	32.47	27.06	sp|Q1HCL7|NAKD2_RAT	NAD kinase 2, mitochondrial OS=Rattus norvegicus GN=Nadk2 PE=1 SV=1	RAT	12	1.02802	1.01859	1	0.990832	0.0145621	1.00936
1172	15.97	17.85	33.33	19.64	14.95	tr|Q4QR73|Q4QR73_RAT	DnaJ (Hsp40) homolog, subfamily A, member 4 OS=Rattus norvegicus GN=Dnaja4 PE=1 SV=1	RAT	10	0.981748	1	0.946237	0.963829	0.0205937	0.972954
1173	15.96	16.07	40	31.71	25.14	sp|Q5XIG8|STRAP_RAT	Serine-threonine kinase receptor-associated protein OS=Rattus norvegicus GN=Strap PE=1 SV=1	RAT	9	1	1.03753	0.981748	1.01859	0.0205937	1.00947
1174	15.95	19.96	70.23	63.11	47.57	sp|P62716|PP2AB_RAT	Serine/threonine-protein phosphatase 2A catalytic subunit beta isoform OS=Rattus norvegicus GN=Ppp2cb PE=2 SV=1	RAT	17	1.58489	1.47231	1.31826	1.22462	0.099009	1.40002
1175	15.94	19.27	20.2	15.11	8.381	sp|B5DFC9|NID2_RAT	Nidogen-2 OS=Rattus norvegicus GN=Nid2 PE=2 SV=1	RAT	12	0.92045	0.630957	1.02802	0.711214	0.193066	0.822659
1176	15.94	18.37	29.38	16.83	8.264	tr|F1LQS6|F1LQS6_RAT	RCG61833 OS=Rattus norvegicus GN=Xdh PE=1 SV=2	RAT	11	1.1272	1.10662	1.1272	1.11686	0.00762237	1.11947
1177	15.93	17.65	67.34	49.6	43.95	sp|P19234|NDUV2_RAT	NADH dehydrogenase [ubiquinone] flavoprotein 2, mitochondrial OS=Rattus norvegicus GN=Ndufv2 PE=1 SV=2	RAT	11	0.972747	0.990832	1.01859	1.03753	0.0247966	1.00492
1178	15.92	20.66	60.06	52.85	44.74	sp|P20761|IGG2B_RAT	Ig gamma-2B chain C region OS=Rattus norvegicus GN=Igh-1a PE=1 SV=1	RAT	27	0.698232	0.340408	0.724436	0.359749	0.341044	0.530706
1179	15.9	19.52	54.26	45.39	32.98	sp|P21913|SDHB_RAT	Succinate dehydrogenase [ubiquinone] iron-sulfur subunit, mitochondrial OS=Rattus norvegicus GN=Sdhb PE=2 SV=2	RAT	12	0.847227	0.990832	0.92045	1.08643	0.091894	0.961234
1180	15.9	15.98	35.11	27.74	22.14	tr|D3ZDF0|D3ZDF0_RAT	Neuroplastin OS=Rattus norvegicus GN=Nptn PE=1 SV=3	RAT	13	1.19124	1.00925	1.09648	0.903649	0.101211	1.05016
1181	15.87	16.32	43.37	31.72	23.12	sp|Q6MG55|ABHGA_RAT	Abhydrolase domain-containing protein 16A OS=Rattus norvegicus GN=Abhd16a PE=2 SV=1	RAT	12	0.92045	0.937562	0.937562	0.963829	0.0164992	0.939851
1182	15.86	37.16	74.5	66.44	64.09	tr|Q6P9Y4|Q6P9Y4_RAT	ADP/ATP translocase 1 OS=Rattus norvegicus GN=Slc25a4 PE=1 SV=1	RAT	34	1	1	0.751623	0.751623	0.141798	0.875811
1183	15.86	18.56	22.53	15.33	10.6	tr|A0A0G2JZ40|A0A0G2JZ40_RAT	Protein Reck OS=Rattus norvegicus GN=Reck PE=4 SV=1	RAT	13	1.11686	1.00925	1.03753	0.928966	0.0656598	1.02315
1184	15.85	18.29	35.94	22.74	15.97	tr|A0A0G2JSJ5|A0A0G2JSJ5_RAT	Anthrax toxin receptor 1 OS=Rattus norvegicus GN=Antxr1 PE=1 SV=1	RAT	10	0.539511	1.15878	0.457088	1.02802	0.38013	0.795848
1185	15.83	18.13	38.62	30.86	24.51	tr|D4A777|D4A777_RAT	Protein Fam114a1 OS=Rattus norvegicus GN=Fam114a1 PE=1 SV=2	RAT	13	0.824138	0.954993	0.717794	0.824138	0.101276	0.830266
1186	15.83	17.32	44.71	33.53	22.55	tr|Q4KLI7|Q4KLI7_RAT	Protein Sf3a3 OS=Rattus norvegicus GN=Sf3a3 PE=1 SV=1	RAT	11	0.963829	1.01859	0.954993	1	0.0263955	0.984353
1187	15.81	16.06	36.4	24.85	19.37	tr|A0A0G2K8K3|A0A0G2K8K3_RAT	Heparin cofactor 2 OS=Rattus norvegicus GN=Serpind1 PE=1 SV=1	RAT	12	0.608135	0.519996	0.586138	0.501187	0.080283	0.553864
1188	15.81	15.85	37.09	25.06	24.06	sp|Q9QX69|LANC1_RAT	LanC-like protein 1 OS=Rattus norvegicus GN=Lancl1 PE=1 SV=2	RAT	10	1.09648	1.00925	1.03753	0.954993	0.0498021	1.02456
1189	15.78	17.03	32.53	19.69	12.97	tr|D3ZKG1|D3ZKG1_RAT	Protein Mut OS=Rattus norvegicus GN=Mut PE=1 SV=2	RAT	12	1.0666	1.03753	1.01859	0.990832	0.0268505	1.02839
1190	15.77	17.6	53.21	41.9	33.03	sp|P22509|FBRL_RAT	rRNA 2'-O-methyltransferase fibrillarin OS=Rattus norvegicus GN=Fbl PE=1 SV=2	RAT	10	0.679204	0.903649	0.625173	0.831764	0.147841	0.759947
1191	15.77	15.97	57.14	54.84	45.16	sp|Q5XIU9|PGRC2_RAT	Membrane-associated progesterone receptor component 2 OS=Rattus norvegicus GN=Pgrmc2 PE=1 SV=1	RAT	9	1.00925	1	0.972747	0.963829	0.0189858	0.986457
1192	15.75	19.49	38.03	24.58	15.27	tr|G3V7T3|G3V7T3_RAT	Pantothenate kinase 4 OS=Rattus norvegicus GN=Pank4 PE=1 SV=1	RAT	15	1.03753	1.0666	1.01859	1.04713	0.0166038	1.04246
1193	15.75	17.01	40.53	29.37	18.2	tr|D3ZZX1|D3ZZX1_RAT	Inositol polyphosphate-5-phosphatase A (Predicted), isoform CRA_a OS=Rattus norvegicus GN=Inpp5a PE=1 SV=1	RAT	10	1	1.03753	0.954993	0.990832	0.029486	0.995838
1194	15.72	19.17	34.97	24.11	12.19	sp|Q62825|EXOC3_RAT	Exocyst complex component 3 OS=Rattus norvegicus GN=Exoc3 PE=1 SV=1	RAT	14	1.02802	1.03753	1.01859	1.02802	0.00651267	1.02804
1195	15.7	22.44	47.34	30.97	22.49	tr|F1M9C9|F1M9C9_RAT	Protein Hars2 OS=Rattus norvegicus GN=Hars2 PE=1 SV=1	RAT	11	1.00925	1.07647	1.03753	1.10662	0.0350641	1.05747
1196	15.69	21.78	43.2	25.35	16.15	tr|A0A0G2JTM1|A0A0G2JTM1_RAT	Protein Diap2 OS=Rattus norvegicus GN=Diap2 PE=1 SV=1	RAT	17	1.00925	0.990832	1.03753	1.00925	0.0164992	1.01172
1197	15.67	16.63	31.8	22.15	15.03	sp|P08461|ODP2_RAT	Dihydrolipoyllysine-residue acetyltransferase component of pyruvate dehydrogenase complex, mitochondrial OS=Rattus norvegicus GN=Dlat PE=1 SV=3	RAT	12	0.981748	1.02802	1.02802	1.07647	0.032562	1.02856
1198	15.66	17.74	92.05	84.11	74.83	sp|Q4KLF8|ARPC5_RAT	Actin-related protein 2/3 complex subunit 5 OS=Rattus norvegicus GN=Arpc5 PE=1 SV=3	RAT	15	1.0666	1.21339	0.963829	1.10662	0.0821674	1.08761
1199	15.65	28.48	37.83	21.63	9.259	tr|D3ZYD7|D3ZYD7_RAT	Protein Ccdc88a OS=Rattus norvegicus GN=Ccdc88a PE=1 SV=3	RAT	21	1.00925	0.990832	1.04713	1.03753	0.0219179	1.02119
1200	15.65	15.98	68.66	56.22	42.86	sp|P62994|GRB2_RAT	Growth factor receptor-bound protein 2 OS=Rattus norvegicus GN=Grb2 PE=1 SV=1	RAT	10	0.946237	0.855067	0.855067	0.765597	0.0746559	0.855492
1201	15.63	18.82	41.62	38.92	24.86	sp|Q99PD4|ARC1A_RAT	Actin-related protein 2/3 complex subunit 1A OS=Rattus norvegicus GN=Arpc1a PE=2 SV=1	RAT	10	0.981748	1.01859	0.937562	0.963829	0.0302012	0.975433
1202	15.61	17.81	39.88	29.75	25	tr|G3V940|G3V940_RAT	Coronin OS=Rattus norvegicus GN=Coro1b PE=1 SV=1	RAT	11	0.990832	0.963829	0.83946	0.809096	0.0864373	0.900804
1203	15.57	16.05	35.65	23.09	18	tr|D3ZUV3|D3ZUV3_RAT	Eukaryotic translation initiation factor 2 subunit 1 OS=Rattus norvegicus GN=Eif2a PE=1 SV=3	RAT	11	1	0.981748	1.05682	1.02802	0.0279859	1.01665
1204	15.49	17	26.95	18.41	13.25	tr|F1M8E8|F1M8E8_RAT	HBS1-like protein OS=Rattus norvegicus GN=Hbs1l PE=1 SV=3	RAT	10	1	1	1.00925	1.00925	0.00460515	1.00463
1205	15.48	18.47	29.27	22.67	16.07	tr|B1WC02|B1WC02_RAT	CTP synthase OS=Rattus norvegicus GN=Ctps1 PE=1 SV=1	RAT	10	1.19124	1.1695	1.45881	1.43219	0.101392	1.31294
1206	15.48	17.93	33.6	26.15	19.78	sp|A2RRU1|GYS1_RAT	Glycogen [starch] synthase, muscle OS=Rattus norvegicus GN=Gys1 PE=1 SV=1	RAT	12	1.09648	1.08643	0.972747	0.954993	0.0624696	1.02766
1207	15.48	17.64	33.59	27.26	23.03	tr|Q56R17|Q56R17_RAT	Importin subunit alpha OS=Rattus norvegicus GN=Kpna4 PE=1 SV=1	RAT	10	1.01859	1.02802	0.972747	0.981748	0.0234781	1.00028
1208	15.45	16.02	59.19	49.33	39.01	sp|Q6AXT5|RAB21_RAT	Ras-related protein Rab-21 OS=Rattus norvegicus GN=Rab21 PE=2 SV=1	RAT	11	0.847227	0.801678	1.0666	1.01859	0.119495	0.933523
1209	15.42	18.21	25.58	18.93	12.39	tr|D4A994|D4A994_RAT	Protein Emc1 OS=Rattus norvegicus GN=Emc1 PE=1 SV=1	RAT	12	0.981748	0.954993	1	0.972747	0.0166038	0.977372
1210	15.41	21.6	65.2	54.21	50.18	sp|Q9Z0V5|PRDX4_RAT	Peroxiredoxin-4 OS=Rattus norvegicus GN=Prdx4 PE=2 SV=1	RAT	25	1.07647	1.00925	0.895365	0.83946	0.0973782	0.955136
1211	15.41	15.78	45.88	40.86	35.13	sp|Q63377|AT1B3_RAT	Sodium/potassium-transporting ATPase subunit beta-3 OS=Rattus norvegicus GN=Atp1b3 PE=2 SV=1	RAT	10	0.972747	0.963829	1.00925	1	0.0189858	0.986457
1212	15.39	16.03	39.68	29.96	17.26	tr|Q5U3Z7|Q5U3Z7_RAT	Serine hydroxymethyltransferase OS=Rattus norvegicus GN=Shmt2 PE=1 SV=1	RAT	9	1.01859	1.04713	0.990832	1.01859	0.0195378	1.01879
1213	15.38	16.6	37.76	29.98	21.25	tr|G3V6G5|G3V6G5_RAT	Protein Tbl1x OS=Rattus norvegicus GN=Tbl1x PE=1 SV=1	RAT	10	0.83946	0.972747	0.698232	0.809096	0.117858	0.829884
1214	15.37	17.58	60.08	49.05	39.54	tr|G3V7Q6|G3V7Q6_RAT	Proteasome subunit beta type OS=Rattus norvegicus GN=Psmb5 PE=1 SV=1	RAT	15	1	1.01859	1.01859	1.03753	0.0130253	1.01868
1215	15.36	15.43	35.18	27.7	26.59	tr|D4AC36|D4AC36_RAT	Eukaryotic translation initiation factor 3 subunit F OS=Rattus norvegicus GN=Eif3f PE=1 SV=3	RAT	10	1.00925	0.990832	0.963829	0.954993	0.0220079	0.979727
1216	15.27	15.35	43.87	30.52	30.52	sp|Q8CG45|ARK72_RAT	Aflatoxin B1 aldehyde reductase member 2 OS=Rattus norvegicus GN=Akr7a2 PE=1 SV=2	RAT	10	0.937562	1.07647	0.862979	0.990832	0.0805021	0.966959
1217	15.26	16.25	78.68	52.21	41.91	sp|P61354|RL27_RAT	60S ribosomal protein L27 OS=Rattus norvegicus GN=Rpl27 PE=2 SV=2	RAT	12	1.00925	1.00925	0.954993	0.954993	0.027624	0.982123
1218	15.25	18.32	26.81	16.58	11.53	tr|D4A927|D4A927_RAT	Protein Tacc1 OS=Rattus norvegicus GN=Tacc1 PE=1 SV=1	RAT	12	1.00925	1.01859	1.03753	1.04713	0.0145621	1.02813
1219	15.25	16	31.93	24.87	14.45	tr|F1LS72|F1LS72_RAT	Protein Uba2 OS=Rattus norvegicus GN=Uba2 PE=1 SV=3	RAT	9	0.937562	0.981748	0.903649	0.946237	0.0294861	0.942299
1220	15.24	21.93	33.31	16.66	8.224	sp|Q6TRW4|PDS5B_RAT	Sister chromatid cohesion protein PDS5 homolog B OS=Rattus norvegicus GN=Pds5b PE=1 SV=2	RAT	18	0.903649	0.660693	0.801678	0.580764	0.169251	0.736696
1221	15.24	20.4	40.37	32.72	22.69	sp|Q63692|CDC37_RAT	Hsp90 co-chaperone Cdc37 OS=Rattus norvegicus GN=Cdc37 PE=1 SV=2	RAT	12	1.07647	1.00925	0.928966	0.879023	0.0775412	0.973427
1222	15.23	23.37	27.43	15.3	7.374	tr|D3Z9D2|D3Z9D2_RAT	FYVE and coiled-coil domain containing 1 (Predicted) OS=Rattus norvegicus GN=Fyco1 PE=1 SV=1	RAT	17	1.0666	1.02802	1.23595	1.19124	0.0758329	1.13045
1223	15.21	18.45	61.92	52.94	43.96	tr|B2RYQ2|B2RYQ2_RAT	Protein Ppp2r4 OS=Rattus norvegicus GN=Ppp2r4 PE=1 SV=1	RAT	14	1.14815	1.1272	0.946237	0.928966	0.0968512	1.03764
1224	15.21	16.08	78.69	72.13	72.13	tr|D3ZX38|D3ZX38_RAT	Prefoldin 1 (Predicted) OS=Rattus norvegicus GN=Pfdn1 PE=1 SV=1	RAT	11	1.00925	0.895365	0.92045	0.824138	0.0725551	0.912301
1225	15.17	15.22	37.25	30.66	24.07	sp|Q64240|AMBP_RAT	Protein AMBP OS=Rattus norvegicus GN=Ambp PE=1 SV=1	RAT	9	1.01859	0.816582	0.963829	0.772681	0.11353	0.892921
1226	15.15	15.22	52.14	52.14	52.14	sp|P62832|RL23_RAT	60S ribosomal protein L23 OS=Rattus norvegicus GN=Rpl23 PE=2 SV=1	RAT	11	0.981748	1.02802	0.981748	1.03753	0.0255474	1.00726
1227	15.14	17.09	48.46	43.85	35	sp|P52555|ERP29_RAT	Endoplasmic reticulum resident protein 29 OS=Rattus norvegicus GN=Erp29 PE=1 SV=2	RAT	10	0.990832	1.00925	0.963829	0.981748	0.0166038	0.986415
1228	15.13	16.34	28.33	16.5	9.003	tr|D3ZHI8|D3ZHI8_RAT	Protein Trappc11 OS=Rattus norvegicus GN=Trappc11 PE=1 SV=1	RAT	11	0.972747	0.981748	0.954993	0.963829	0.0102973	0.968329
1229	15.11	18.33	36.85	26.87	18.43	sp|P63329|PP2BA_RAT	Serine/threonine-protein phosphatase 2B catalytic subunit alpha isoform OS=Rattus norvegicus GN=Ppp3ca PE=1 SV=1	RAT	12	1.01859	1	1.01859	1	0.00921009	1.0093
1230	15.11	15.53	50	42.05	42.05	tr|D3ZS55|D3ZS55_RAT	Protein Sbspon OS=Rattus norvegicus GN=Sbspon PE=4 SV=1	RAT	14	0.954993	0.981748	0.928966	0.954993	0.0195378	0.955175
1231	15.09	17.91	34.84	23.09	15.72	sp|Q5XHZ0|TRAP1_RAT	Heat shock protein 75 kDa, mitochondrial OS=Rattus norvegicus GN=Trap1 PE=1 SV=1	RAT	14	0.816582	1.11686	1	1.36773	0.185907	1.07529
1232	15.09	16.99	62.66	58.23	52.53	sp|P62282|RS11_RAT	40S ribosomal protein S11 OS=Rattus norvegicus GN=Rps11 PE=1 SV=3	RAT	12	1.21339	0.772681	1.10662	0.704693	0.226851	0.949347
1233	15.06	16.21	37.06	30.77	22.55	sp|Q9QWE9|GGT5_RAT	Gamma-glutamyltransferase 5 OS=Rattus norvegicus GN=Ggt5 PE=2 SV=1	RAT	12	0.981748	0.654636	0.855067	0.580764	0.207071	0.768054
1234	15.05	31.06	38.04	29.75	20.19	tr|D4AC38|D4AC38_RAT	Protein Ago1 OS=Rattus norvegicus GN=Ago1 PE=1 SV=1	RAT	17	1.07647	1.11686	0.912011	0.954993	0.0829535	1.01508
1235	15.05	18	53.04	42.54	28.18	sp|Q02589|ADPRH_RAT	[Protein ADP-ribosylarginine] hydrolase OS=Rattus norvegicus GN=Adprh PE=1 SV=2	RAT	10	0.946237	0.937562	1.00925	1	0.0325528	0.973263
1236	15.04	16.49	36.36	24.94	17.95	tr|D3ZUN5|D3ZUN5_RAT	Protein O-fucosyltransferase 2 (Predicted), isoform CRA_a OS=Rattus norvegicus GN=Pofut2 PE=1 SV=1	RAT	9	1	1.02802	1.01859	1.04713	0.0166038	1.02343
1237	15.04	15.19	70.37	62.96	60.19	tr|M0RE00|M0RE00_RAT	RCG44419, isoform CRA_a OS=Rattus norvegicus GN=Tbca PE=1 SV=2	RAT	11	0.981748	1.03753	0.879023	0.92045	0.0630489	0.954687
1238	15.02	26.44	30.19	18.38	11.09	tr|F1LRL4|F1LRL4_RAT	Protein Tbc1d9b OS=Rattus norvegicus GN=Tbc1d9b PE=1 SV=2	RAT	20	1	1.00925	1.00925	1.00925	0.00397901	1.00694
1239	15.02	18.13	44.5	32.46	24.08	sp|P08050|CXA1_RAT	Gap junction alpha-1 protein OS=Rattus norvegicus GN=Gja1 PE=1 SV=2	RAT	11	1.04713	1	0.990832	0.954993	0.0329153	0.998238
1240	15	17.01	27.47	20.8	14.48	tr|F1LPQ9|F1LPQ9_RAT	A-kinase anchor protein 2 OS=Rattus norvegicus GN=Akap2 PE=1 SV=2	RAT	12	0.963829	0.92045	0.963829	0.92045	0.0230218	0.942139
1241	15	16.05	50.64	41.98	32.82	tr|Q5XIJ3|Q5XIJ3_RAT	Isocitrate dehydrogenase [NAD] subunit, mitochondrial OS=Rattus norvegicus GN=Idh3g PE=1 SV=1	NAD	11	1.02802	1.10662	1.00925	1.08643	0.0379605	1.05758
1242	15	15.67	69.05	65.48	50.6	tr|B2RZ72|B2RZ72_RAT	Actin related protein 2/3 complex, subunit 4 (Predicted), isoform CRA_a OS=Rattus norvegicus GN=Arpc4 PE=1 SV=1	RAT	13	1.27057	1.1695	1.40605	1.2942	0.0654369	1.28508
1243	14.98	23.94	26.64	15.91	9.636	tr|Q5RKH5|Q5RKH5_RAT	Phosphorylase kinase, beta OS=Rattus norvegicus GN=Phkb PE=1 SV=1	RAT	16	1.01859	1.02802	0.912011	0.92045	0.0553982	0.969767
1244	14.98	15.17	30.43	23.99	18.2	tr|D3ZSC1|D3ZSC1_RAT	Protein Susd5 OS=Rattus norvegicus GN=Susd5 PE=4 SV=1	RAT	11	0.855067	0.831764	1.08643	1.0666	0.121931	0.959963
1245	14.97	15.8	50	43.95	28.66	tr|G3V6H5|G3V6H5_RAT	Mitochondrial 2-oxoglutarate/malate carrier protein OS=Rattus norvegicus GN=Slc25a11 PE=1 SV=1	RAT	11	1	0.981748	0.963829	0.946237	0.0205937	0.972954
1246	14.96	17.89	39.84	30.89	23.78	tr|Q5D023|Q5D023_RAT	Cytoplasmic dynein 1 light intermediate chain 2 OS=Rattus norvegicus GN=Dync1li2 PE=1 SV=1	RAT	11	0.990832	0.801678	0.954993	0.772681	0.107138	0.880046
1247	14.95	14.98	44.15	36.12	29.1	sp|Q5PQL2|RCD1_RAT	Cell differentiation protein RCD1 homolog OS=Rattus norvegicus GN=Rqcd1 PE=1 SV=1	RAT	8	0.963829	0.963829	0.954993	0.954993	0.00460514	0.959411
1248	14.93	15.14	60.6	52.24	44.48	sp|P29266|3HIDH_RAT	3-hydroxyisobutyrate dehydrogenase, mitochondrial OS=Rattus norvegicus GN=Hibadh PE=1 SV=3	RAT	13	0.83946	0.895365	0.787046	0.83946	0.0455849	0.840333
1249	14.92	19.26	52.84	41.76	31.25	tr|Q6AXW2|Q6AXW2_RAT	Protein Tmod3 OS=Rattus norvegicus GN=Tmod3 PE=1 SV=1	RAT	12	1.03753	1.14815	0.954993	1.04713	0.0654597	1.04695
1250	14.92	15.58	40.94	34	20.35	tr|A0A0G2K6X9|A0A0G2K6X9_RAT	Adenosine kinase OS=Rattus norvegicus GN=Adk PE=1 SV=1	RAT	8	1.00925	1.08643	0.981748	1.0666	0.040774	1.03601
1251	14.91	15.83	56.21	46.55	34.48	sp|Q9JHB5|TSNAX_RAT	Translin-associated protein X OS=Rattus norvegicus GN=Tsnax PE=1 SV=1	RAT	9	0.954993	0.954993	0.928966	0.937562	0.0119488	0.944128
1252	14.9	25.89	26.78	14.59	7.818	tr|F1LNQ9|F1LNQ9_RAT	Protein Clasp1 OS=Rattus norvegicus GN=Clasp1 PE=1 SV=3	RAT	16	0.972747	1.00925	1	1.03753	0.0230251	1.00488
1253	14.9	18.65	60.24	55.42	44.18	tr|B5DER3|B5DER3_RAT	Hypertrophic agonist responsive protein B64, isoform CRA_b OS=Rattus norvegicus GN=Iah1 PE=1 SV=1	RAT	11	0.946237	1.19124	0.824138	1.03753	0.134006	0.999786
1254	14.9	16.54	45.28	39.15	33.96	tr|F1LQH9|F1LQH9_RAT	Protein Bag2 OS=Rattus norvegicus GN=Bag2 PE=4 SV=2	RAT	9	1.03753	1.03753	1.00925	1.01859	0.0119488	1.02573
1255	14.9	15.21	36.1	26.25	16.06	tr|A0A0G2K435|A0A0G2K435_RAT	Protein Dnajc7 OS=Rattus norvegicus GN=Dnajc7 PE=1 SV=1	RAT	10	0.963829	1.05682	0.946237	1.02802	0.0453497	0.998725
1256	14.86	17.52	25.23	15.66	11.04	tr|F1LQ00|F1LQ00_RAT	Protein Col5a2 OS=Rattus norvegicus GN=Col5a2 PE=1 SV=3	RAT	20	1.05682	1.01859	1.07647	1.03753	0.0205937	1.04735
1257	14.86	15	58.97	50	37.18	tr|A0A0H2UH99|A0A0H2UH99_RAT	60S ribosomal protein L24 OS=Rattus norvegicus GN=Rpl24 PE=1 SV=1	RAT	8	0.946237	1.0666	0.731139	0.816582	0.143182	0.890139
1258	14.83	14.92	55.5	45.93	37.32	tr|A0A0G2JTS3|A0A0G2JTS3_RAT	Vacuolar protein sorting-associated protein 29 OS=Rattus norvegicus GN=Vps29 PE=1 SV=1	RAT	9	0.963829	0.895365	1.00925	0.937562	0.0434371	0.951502
1259	14.82	15.05	57.27	53.3	45.81	tr|G3V6N2|G3V6N2_RAT	Protein Tmed4 OS=Rattus norvegicus GN=Tmed4 PE=1 SV=3	RAT	10	1.09648	0.954993	1.01859	0.887156	0.0782246	0.989305
1260	14.81	19.14	70.22	56	43.56	sp|Q9Z1B2|GSTM5_RAT	Glutathione S-transferase Mu 5 OS=Rattus norvegicus GN=Gstm5 PE=1 SV=3	RAT	18	0.809096	0.946237	0.751623	0.879023	0.0864197	0.846495
1261	14.79	15.13	41.5	35.62	29.41	sp|P45479|PPT1_RAT	Palmitoyl-protein thioesterase 1 OS=Rattus norvegicus GN=Ppt1 PE=1 SV=1	RAT	12	0.963829	0.928966	0.981748	0.946237	0.0205937	0.955195
1262	14.77	19.42	29.92	18.48	11	tr|A0A0G2K2L8|A0A0G2K2L8_RAT	Peripheral plasma membrane protein CASK OS=Rattus norvegicus GN=Cask PE=1 SV=1	RAT	12	0.928966	1.1272	0.887156	1.0666	0.0976981	1.00248
1263	14.77	18.78	32.94	19.33	10.16	sp|P27008|PARP1_RAT	Poly [ADP-ribose] polymerase 1 OS=Rattus norvegicus GN=Parp1 PE=1 SV=4	RAT	11	1	0.954993	0.972747	0.928966	0.0268505	0.964177
1264	14.77	15.08	34.82	23.21	16.44	tr|R9PY08|R9PY08_RAT	Protein disulfide-isomerase A5 OS=Rattus norvegicus GN=Pdia5 PE=1 SV=2	RAT	9	1.07647	0.928966	1.14815	1	0.07904	1.0384
1265	14.76	14.91	75.51	65.99	60.54	tr|D3ZFY8|D3ZFY8_RAT	Protein LOC100362142 OS=Rattus norvegicus GN=LOC100912618 PE=1 SV=1	RAT	10	0.981748	0.972747	1.00925	1	0.0145621	0.990937
1266	14.71	17.13	52.46	37.3	31.97	tr|F7EMB2|F7EMB2_RAT	Protein RGD1304704 OS=Rattus norvegicus GN=RGD1304704 PE=1 SV=1	RAT	10	0.903649	0.972747	0.758578	0.816582	0.0947809	0.862889
1267	14.71	15.96	32.2	21.78	19.7	tr|A0A0G2K9L2|A0A0G2K9L2_RAT	Protein Tom1l2 OS=Rattus norvegicus GN=Tom1l2 PE=1 SV=1	RAT	10	1.01859	1.05682	1	1.03753	0.0205937	1.02823
1268	14.71	15.16	45.52	28.54	23.11	sp|P12007|IVD_RAT	Isovaleryl-CoA dehydrogenase, mitochondrial OS=Rattus norvegicus GN=Ivd PE=1 SV=2	RAT	11	1.38038	1.04713	1.43219	1.0666	0.142747	1.23157
1269	14.71	14.98	70.47	63.73	43.52	sp|P62749|HPCL1_RAT	Hippocalcin-like protein 1 OS=Rattus norvegicus GN=Hpcal1 PE=1 SV=2	RAT	11	0.801678	1.19124	0.731139	1.09648	0.202372	0.955134
1270	14.68	16.49	33.91	20.54	9.565	tr|D3ZUJ8|D3ZUJ8_RAT	Protein Tmtc3 OS=Rattus norvegicus GN=Tmtc3 PE=1 SV=1	RAT	9	0.691831	0.731139	0.772681	0.824138	0.0650683	0.754947
1271	14.68	14.87	23.46	15.39	12.57	tr|A0A0G2JZH3|A0A0G2JZH3_RAT	Protein Thbs3 OS=Rattus norvegicus GN=Thbs3 PE=4 SV=1	RAT	10	0.963829	1.02802	0.972747	1.03753	0.0325528	1.00053
1272	14.66	22.12	72.73	68.88	60.14	sp|B2GUZ5|CAZA1_RAT	F-actin-capping protein subunit alpha-1 OS=Rattus norvegicus GN=Capza1 PE=1 SV=1	RAT	23	1.01859	0.981748	1.00925	0.972747	0.0189858	0.995585
1273	14.65	16.6	34.64	23.89	19.28	tr|F1MAA5|F1MAA5_RAT	Protein Rangap1 OS=Rattus norvegicus GN=Rangap1 PE=1 SV=2	RAT	12	1.03753	1.04713	1.02802	1.03753	0.00651268	1.03755
1274	14.64	15.83	58.69	51.17	39.91	sp|Q06647|ATPO_RAT	ATP synthase subunit O, mitochondrial OS=Rattus norvegicus GN=Atp5o PE=1 SV=1	RAT	12	0.912011	0.824138	0.870964	0.787046	0.0556156	0.84854
1275	14.61	16.68	23.75	10.97	5.374	tr|A0A0G2JVM2|A0A0G2JVM2_RAT	Protein Mia3 OS=Rattus norvegicus GN=Mia3 PE=1 SV=1	RAT	10	1.04713	1.0666	1.00925	1.02802	0.0205937	1.03775
1276	14.61	15.79	48.66	42.69	33.43	tr|G3V734|G3V734_RAT	2,4-dienoyl CoA reductase 1, mitochondrial, isoform CRA_a OS=Rattus norvegicus GN=Decr1 PE=1 SV=1	RAT	13	1.02802	1.08643	0.928966	0.981748	0.0576782	1.00629
1277	14.59	21.25	44.28	35.97	23.49	sp|P47197|AKT2_RAT	RAC-beta serine/threonine-protein kinase OS=Rattus norvegicus GN=Akt2 PE=1 SV=1	RAT	12	1.01859	0.981748	0.990832	0.946237	0.0262656	0.984352
1278	14.59	14.94	50.95	39.76	24.76	tr|A0A0G2JSH4|A0A0G2JSH4_RAT	Glycogen synthase kinase 3 beta, isoform CRA_b OS=Rattus norvegicus GN=Gsk3b PE=1 SV=1	RAT	9	0.972747	0.937562	1.00925	0.972747	0.0260501	0.973077
1279	14.58	18.13	26.85	17.65	13.17	sp|Q3B8Q1|DDX21_RAT	Nucleolar RNA helicase 2 OS=Rattus norvegicus GN=Ddx21 PE=2 SV=1	RAT	11	1.00925	1.04713	1.00925	1.04713	0.0184186	1.02819
1280	14.58	16.76	68.5	56.3	51.18	tr|B0BNJ4|B0BNJ4_RAT	Ethylmalonic encephalopathy 1 OS=Rattus norvegicus GN=Ethe1 PE=1 SV=1	RAT	12	0.887156	3.0761	0.772681	2.48886	0.553058	1.8062
1281	14.56	15.92	36.03	29.21	18.12	sp|Q6AXV4|SAM50_RAT	Sorting and assembly machinery component 50 homolog OS=Rattus norvegicus GN=Samm50 PE=1 SV=1	RAT	8	0.981748	0.963829	1	0.990832	0.0135817	0.984102
1282	14.56	14.9	52.82	35.55	32.23	sp|P16975|SPRC_RAT	SPARC OS=Rattus norvegicus GN=Sparc PE=1 SV=4	RAT	18	0.981748	1.07647	1.0666	1.15878	0.0585395	1.0709
1283	14.56	14.66	50.89	41.42	27.22	tr|B0BN63|B0BN63_RAT	LOC681996 protein OS=Rattus norvegicus GN=Ahsa1 PE=1 SV=1	RAT	8	0.772681	0.855067	0.954993	1.05682	0.117157	0.909889
1284	14.54	14.79	31.84	28.21	20.73	sp|O08628|PCOC1_RAT	Procollagen C-endopeptidase enhancer 1 OS=Rattus norvegicus GN=Pcolce PE=1 SV=1	RAT	8	0.831764	0.990832	0.870964	1.04713	0.0932954	0.935172
1285	14.53	14.77	25.06	18.58	12.84	sp|Q3T1L0|A16A1_RAT	Aldehyde dehydrogenase family 16 member A1 OS=Rattus norvegicus GN=Aldh16a1 PE=2 SV=1	RAT	10	1.02802	1.00925	1.01859	1	0.0102973	1.01397
1286	14.51	17.24	53.73	47.2	43.17	sp|Q5XFW8|SEC13_RAT	Protein SEC13 homolog OS=Rattus norvegicus GN=Sec13 PE=1 SV=1	RAT	12	0.963829	0.963829	0.972747	0.981748	0.0076511	0.970538
1287	14.5	14.8	59.02	47.37	43.98	sp|P56571|ES1_RAT	ES1 protein homolog, mitochondrial OS=Rattus norvegicus PE=1 SV=2	RAT	15	0.963829	1.14815	0.772681	0.92045	0.140805	0.951278
1288	14.47	15.28	29.79	16.69	9.889	tr|A0A0G2K4T3|A0A0G2K4T3_RAT	Arf-GAP with coiled-coil, ANK repeat and PH domain-containing protein 2 OS=Rattus norvegicus GN=Acap2 PE=1 SV=1	RAT	10	0.981748	0.963829	1	0.981748	0.0130253	0.981831
1289	14.45	14.87	37.16	29.43	21.95	sp|O08727|TR11B_RAT	Tumor necrosis factor receptor superfamily member 11B OS=Rattus norvegicus GN=Tnfrsf11b PE=2 SV=1	RAT	10	1.02802	1.15878	1.0666	1.20226	0.0625779	1.11391
1290	14.45	14.68	36.51	27.96	24.67	sp|Q5PQS4|GULP1_RAT	PTB domain-containing engulfment adapter protein 1 OS=Rattus norvegicus GN=Gulp1 PE=1 SV=1	RAT	9	0.870964	0.954993	0.855067	0.937562	0.0469337	0.904646
1291	14.44	18.75	45.45	35.61	25.76	sp|A0JPJ7|OLA1_RAT	Obg-like ATPase 1 OS=Rattus norvegicus GN=Ola1 PE=2 SV=1	RAT	13	1.69044	2.91072	0.809096	1.48594	0.440131	1.72405
1292	14.44	17.68	37.19	23.68	14.21	sp|O08700|VPS45_RAT	Vacuolar protein sorting-associated protein 45 OS=Rattus norvegicus GN=Vps45 PE=1 SV=1	RAT	11	0.92045	0.954993	0.937562	0.981748	0.0238856	0.948688
1293	14.43	16.22	45.27	38.02	20.44	tr|A1A5L1|A1A5L1_RAT	Bleomycin hydrolase OS=Rattus norvegicus GN=Blmh PE=1 SV=1	RAT	14	1.08643	0.963829	0.903649	0.801678	0.109731	0.938896
1294	14.43	15.26	34.28	27.2	21.81	sp|Q9JJ54|HNRPD_RAT	Heterogeneous nuclear ribonucleoprotein D0 OS=Rattus norvegicus GN=Hnrnpd PE=1 SV=2	RAT	11	1.07647	0.801678	0.895365	0.660693	0.175897	0.85855
1295	14.4	18.28	39.36	29.26	22.07	sp|P06757|ADH1_RAT	Alcohol dehydrogenase 1 OS=Rattus norvegicus GN=Adh1 PE=1 SV=3	RAT	10	3.66438	2.1677	2.31206	1.31826	0.355302	2.3656
1296	14.4	16.48	49.54	33.33	28.13	sp|Q6AY86|VP26A_RAT	Vacuolar protein sorting-associated protein 26A OS=Rattus norvegicus GN=Vps26a PE=1 SV=1	RAT	10	1	1.05682	0.946237	0.990832	0.0394093	0.998472
1297	14.38	25.91	61.98	54.15	44.47	sp|P15429|ENOB_RAT	Beta-enolase OS=Rattus norvegicus GN=Eno3 PE=1 SV=3	RAT	33	1.0666	0.937562	1.18032	1.03753	0.0819607	1.0555
1298	14.38	15.43	60.54	54.41	40.61	sp|P21670|PSA4_RAT	Proteasome subunit alpha type-4 OS=Rattus norvegicus GN=Psma4 PE=1 SV=1	RAT	10	0.946237	0.963829	1	1.02802	0.0322212	0.984521
1299	14.36	14.46	55.56	48.48	45.45	tr|B0BNJ1|B0BNJ1_RAT	LOC683667 protein OS=Rattus norvegicus GN=Sri PE=1 SV=1	RAT	9	0.912011	0.831764	0.77983	0.704693	0.0936388	0.807074
1300	14.35	17.99	38.4	30.67	27.47	tr|Q5XIH1|Q5XIH1_RAT	Asporin OS=Rattus norvegicus GN=Aspn PE=1 SV=1	RAT	16	0.654636	0.679204	0.586138	0.60256	0.0598757	0.630634
1301	14.34	18.75	25.61	15.07	8.746	sp|Q6QD51|CCD80_RAT	Coiled-coil domain-containing protein 80 OS=Rattus norvegicus GN=Ccdc80 PE=1 SV=1	RAT	10	0.608135	0.887156	1.36773	1.97697	0.429354	1.21
1302	14.34	14.57	44.52	29.22	23.29	tr|M0RA08|M0RA08_RAT	Perilipin OS=Rattus norvegicus GN=Plin3 PE=1 SV=1	RAT	9	0.990832	1	0.963829	0.963829	0.016458	0.979623
1303	14.34	14.36	74.83	68.03	68.03	tr|W0UVG1|W0UVG1_RAT	Ribonuclease 4 OS=Rattus norvegicus GN=Rnase4 PE=1 SV=1	RAT	21	0.937562	0.981748	0.912011	0.954993	0.0268505	0.946578
1304	14.33	16.29	66.51	58.14	49.77	sp|Q4KM74|SC22B_RAT	Vesicle-trafficking protein SEC22b OS=Rattus norvegicus GN=Sec22b PE=1 SV=3	RAT	16	0.887156	0.903649	0.887156	0.912011	0.0119794	0.897493
1305	14.32	18.22	46.75	37.59	33.73	tr|A0A0G2K6G2|A0A0G2K6G2_RAT	Adipocyte plasma membrane-associated protein OS=Rattus norvegicus GN=Apmap PE=1 SV=1	RAT	13	1.04713	1.03753	1	0.990832	0.0234781	1.01887
1306	14.31	15.04	28.85	16.95	8.926	sp|P32198|CPT1A_RAT	Carnitine O-palmitoyltransferase 1, liver isoform OS=Rattus norvegicus GN=Cpt1a PE=1 SV=2	RAT	7	1.00925	0.972747	1	0.972747	0.0164581	0.988687
1307	14.3	21.93	46.75	35.84	25.97	sp|Q5XIE6|HIBCH_RAT	3-hydroxyisobutyryl-CoA hydrolase, mitochondrial OS=Rattus norvegicus GN=Hibch PE=1 SV=2	RAT	16	1.00925	1.03753	1	1.01859	0.0136623	1.01634
1308	14.29	14.96	75	66.86	56.4	tr|B4F7A3|B4F7A3_RAT	Galectin OS=Rattus norvegicus GN=Lgalsl PE=1 SV=1	RAT	8	0.801678	1	0.794328	1.00925	0.114717	0.901315
1309	14.28	16.43	37.63	28.33	15.02	tr|A0A0G2KB56|A0A0G2KB56_RAT	Glutamine fructose-6-phosphate transaminase 1, isoform CRA_a OS=Rattus norvegicus GN=Gfpt1 PE=1 SV=1	RAT	11	1.00925	1.02802	1.04713	1.05682	0.017642	1.0353
1310	14.26	15.44	37.01	28.35	23.81	tr|R9PXT0|R9PXT0_RAT	NEDD8-activating enzyme E1 catalytic subunit OS=Rattus norvegicus GN=Uba3 PE=1 SV=2	RAT	12	0.954993	1	0.912011	0.963829	0.0326944	0.957708
1311	14.26	14.65	40.06	32.6	21.55	tr|D4ABI7|D4ABI7_RAT	Protein Hacd3 OS=Rattus norvegicus GN=Hacd3 PE=1 SV=2	RAT	9	1.01859	0.981748	0.981748	0.946237	0.0260501	0.982081
1312	14.26	14.49	41.07	30.61	23.47	tr|Q5RKH2|Q5RKH2_RAT	Galactokinase 1 OS=Rattus norvegicus GN=Galk1 PE=1 SV=1	RAT	10	0.946237	0.92045	1.08643	1.0666	0.0721463	1.00493
1313	14.24	19.93	38.26	21.13	12.1	sp|Q62824|EXOC4_RAT	Exocyst complex component 4 OS=Rattus norvegicus GN=Exoc4 PE=1 SV=1	RAT	12	0.946237	1.01859	0.937562	1.00925	0.0371119	0.977911
1314	14.24	14.83	38.06	26	16.55	sp|Q32Q06|AP1M1_RAT	AP-1 complex subunit mu-1 OS=Rattus norvegicus GN=Ap1m1 PE=1 SV=3	RAT	7	1.08643	1.07647	1.01859	1.00925	0.0325528	1.04768
1315	14.23	18.96	50.57	38	32.57	tr|B4F7A9|B4F7A9_RAT	Casein kinase 2, alpha prime polypeptide OS=Rattus norvegicus GN=Csnk2a2 PE=1 SV=1	RAT	11	1.00925	0.981748	0.981748	0.954993	0.0195378	0.981935
1316	14.23	15.31	38.88	25.61	19.25	tr|D3ZGT6|D3ZGT6_RAT	Procollagen-proline, 2-oxoglutarate 4-dioxygenase (Proline 4-hydroxylase), alpha II polypeptide (Predicted), isoform CRA_a OS=Rattus norvegicus GN=P4ha2 PE=1 SV=1	RAT	8	1	1.07647	1.03753	1.11686	0.0411797	1.05771
1317	14.22	17.59	44.24	39.93	38.49	sp|Q6AY20|MPRD_RAT	Cation-dependent mannose-6-phosphate receptor OS=Rattus norvegicus GN=M6pr PE=1 SV=1	RAT	12	0.963829	1	0.972747	1.00925	0.0189858	0.986457
1318	14.22	16.22	42.63	28.95	24.93	sp|Q5EAJ6|IKIP_RAT	Inhibitor of nuclear factor kappa-B kinase-interacting protein OS=Rattus norvegicus GN=Ikbip PE=2 SV=1	RAT	13	1.10662	0.801678	1.10662	0.794328	0.16206	0.952313
1319	14.21	14.25	36.2	27.91	22.7	tr|Q6V7V4|Q6V7V4_RAT	AMP-activated protein kinase gamma 2 non-catalytic subunit OS=Rattus norvegicus GN=Prkag2 PE=1 SV=1	RAT	8	0.912011	0.928966	0.963829	0.981748	0.02912	0.946639
1320	14.2	14.54	41.52	31.7	24.82	sp|Q6AXS5|PAIRB_RAT	Plasminogen activator inhibitor 1 RNA-binding protein OS=Rattus norvegicus GN=Serbp1 PE=1 SV=2	RAT	9	0.946237	0.972747	0.92045	0.946237	0.0195378	0.946418
1321	14.19	14.74	30.24	23.11	16.2	tr|A0A0G2JU49|A0A0G2JU49_RAT	Protein Mtx1 OS=Rattus norvegicus GN=Mtx1 PE=1 SV=1	RAT	8	0.937562	0.972747	0.963829	1	0.0230251	0.968535
1322	14.16	14.23	35.37	31.44	29.69	sp|P08082|CLCB_RAT	Clathrin light chain B OS=Rattus norvegicus GN=Cltb PE=1 SV=1	RAT	10	1.00925	0.990832	0.990832	0.963829	0.0163878	0.988686
1323	14.15	17.66	42.92	26.46	21.46	sp|Q9QZK5|HTRA1_RAT	Serine protease HTRA1 OS=Rattus norvegicus GN=Htra1 PE=2 SV=1	RAT	13	1	1.00925	1	1.00925	0.00460515	1.00463
1324	14.14	32.84	80.08	73.98	65.85	sp|P68511|1433F_RAT	14-3-3 protein eta OS=Rattus norvegicus GN=Ywhah PE=1 SV=2	RAT	25	1.20226	1.77011	0.809096	1.20226	0.274946	1.24593
1325	14.13	22.63	34.37	24.6	16.55	tr|A0A0H2UHV9|A0A0H2UHV9_RAT	Coatomer subunit gamma OS=Rattus norvegicus GN=Copg2 PE=1 SV=1	RAT	13	1.02802	1	1.02802	0.990832	0.0164269	1.01172
1326	14.13	14.3	30.21	25.94	25.13	tr|F7EWC1|F7EWC1_RAT	Protein Vasp OS=Rattus norvegicus GN=Vasp PE=1 SV=2	RAT	12	0.816582	1.00925	0.758578	0.928966	0.110761	0.878345
1327	14.12	23.25	49.04	39.18	33.65	tr|R9PXT9|R9PXT9_RAT	Protein kinase, cAMP dependent regulatory, type II beta, isoform CRA_a OS=Rattus norvegicus GN=Prkar2b PE=1 SV=2	RAT	15	1.09648	1.02802	1.03753	0.972747	0.0424539	1.03369
1328	14.11	19.66	37.89	27.58	16.24	tr|B1WBY1|B1WBY1_RAT	Cul1 protein OS=Rattus norvegicus GN=Cul1 PE=1 SV=1	RAT	14	1.01859	1.02802	1.01859	1.02802	0.00460514	1.0233
1329	14.11	15.35	54.25	38.46	30.77	tr|M0RD75|M0RD75_RAT	40S ribosomal protein S6 OS=Rattus norvegicus GN=Rps6 PE=1 SV=1	RAT	9	0.895365	1.21339	1.11686	1.49968	0.183669	1.18133
1330	14.11	15.07	39.32	31.34	27.64	sp|Q5BK81|PTGR2_RAT	Prostaglandin reductase 2 OS=Rattus norvegicus GN=Ptgr2 PE=2 SV=2	RAT	8	1.00925	1.05682	0.963829	1	0.0329153	1.00747
1331	14.11	14.24	41.39	31.39	26.11	tr|D4A746|D4A746_RAT	GDP-mannose pyrophosphorylase B (Predicted), isoform CRA_a OS=Rattus norvegicus GN=Gmppb PE=1 SV=1	RAT	10	0.972747	1	1.01859	1.04713	0.0268505	1.00962
1332	14.11	14.23	28.15	16.72	14.4	sp|P14056|ARAF_RAT	Serine/threonine-protein kinase A-Raf OS=Rattus norvegicus GN=Araf PE=1 SV=1	RAT	9	0.887156	0.954993	0.937562	1.00925	0.0460454	0.947241
1333	14.11	14.12	51.14	48.3	40.34	tr|D4A0T0|D4A0T0_RAT	Protein Ndufb10 OS=Rattus norvegicus GN=Ndufb10 PE=1 SV=1	RAT	7	0.937562	1.02802	0.912011	1	0.0480522	0.969397
1334	14.06	14.26	78.17	70.42	67.61	tr|B1H216|B1H216_RAT	Hemoglobin alpha, adult chain 2 OS=Rattus norvegicus GN=Hba1 PE=1 SV=1	RAT	15	4.96592	2.0893	5.7544	2.35505	0.421067	3.79117
1335	14.05	25.15	24.49	11.67	6.159	tr|D3ZGN7|D3ZGN7_RAT	Protein Mical3 OS=Rattus norvegicus GN=Mical3 PE=1 SV=2	RAT	15	0.912011	0.963829	1.1695	1.23595	0.126796	1.07032
1336	14.05	18.8	49.13	31.74	22.61	tr|A0A0A0MXZ9|A0A0A0MXZ9_RAT	Death-associated protein kinase 3 (Fragment) OS=Rattus norvegicus GN=Dapk3 PE=1 SV=1	RAT	11	0.928966	0.92045	0.981748	0.972747	0.0280055	0.950978
1337	14.05	15.84	36.5	23.6	21.17	tr|M0RDK9|M0RDK9_RAT	Protein Acad8 OS=Rattus norvegicus GN=Acad8 PE=1 SV=2	RAT	10	1.05682	1.15878	0.972747	1.0666	0.0619455	1.06373
1338	14.04	50.73	29.79	17.84	11.37	tr|D4A8D5|D4A8D5_RAT	Filamin, beta (Predicted) OS=Rattus norvegicus GN=Flnb PE=1 SV=1	RAT	45	1.13763	1.36773	1.1272	1.35519	0.0919602	1.24694
1339	14.04	14.7	43.18	40.45	35.91	sp|Q6PCT3|TPD54_RAT	Tumor protein D54 OS=Rattus norvegicus GN=Tpd52l2 PE=1 SV=1	RAT	7	0.698232	0.912011	0.597035	0.77983	0.154393	0.746777
1340	14.01	18.39	28.35	15.92	9.481	sp|Q2KN99|CYTSA_RAT	Cytospin-A OS=Rattus norvegicus GN=Specc1l PE=1 SV=1	RAT	13	0.92045	1.30617	1.47231	2.12814	0.299472	1.45677
1341	14.01	18.37	25.89	16.08	10.23	tr|D3ZC07|D3ZC07_RAT	Protein Pkn3 OS=Rattus norvegicus GN=Pkn3 PE=1 SV=3	RAT	12					#DIV/0!	#DIV/0!
1342	14.01	14.33	44.63	32.21	29.19	sp|Q6AYS8|DHB11_RAT	Estradiol 17-beta-dehydrogenase 11 OS=Rattus norvegicus GN=Hsd17b11 PE=2 SV=1	RAT	10	0.954993	0.912011	0.972747	0.937562	0.0237473	0.944328
1343	14.01	14.26	25.62	14.29	7.926	tr|F1M392|F1M392_RAT	Protein Limch1 OS=Rattus norvegicus GN=Limch1 PE=1 SV=2	RAT	7	1.05682	1.01859	0.990832	0.963829	0.0341677	1.00752
1344	14	17.22	36.07	28.96	22.95	sp|Q568Z6|IST1_RAT	IST1 homolog OS=Rattus norvegicus GN=Ist1 PE=2 SV=1	RAT	11	1	1.00925	1.00925	1.01859	0.00651269	1.00927
1345	14	16.03	36.13	28.03	28.03	tr|D4ABK7|D4ABK7_RAT	Heterogeneous nuclear ribonucleoprotein H3 (2H9) (Predicted), isoform CRA_c OS=Rattus norvegicus GN=Hnrnph3 PE=1 SV=1	RAT	8	0.946237	0.903649	0.954993	0.92045	0.0219179	0.931332
1346	14	15.26	29.81	15.69	9.732	tr|A0A0G2JZZ7|A0A0G2JZZ7_RAT	Protein Abr OS=Rattus norvegicus GN=Abr PE=1 SV=1	RAT	9	1.0666	1.09648	1.04713	1.0666	0.0164992	1.0692
1347	14	14.67	40.92	29.16	23.53	sp|Q5XIC0|ECI2_RAT	Enoyl-CoA delta isomerase 2, mitochondrial OS=Rattus norvegicus GN=Eci2 PE=1 SV=1	RAT	9	1.0666	1.08643	1.03753	1.05682	0.0166038	1.06184
1348	14	14.06	40.88	33.94	30.66	sp|A2RUW1|TOLIP_RAT	Toll-interacting protein OS=Rattus norvegicus GN=Tollip PE=1 SV=1	RAT	8	0.887156	0.928966	0.77983	0.824138	0.0669516	0.855023
1349	14	14.02	41.03	34.62	31.73	sp|O35331|PDXK_RAT	Pyridoxal kinase OS=Rattus norvegicus GN=Pdxk PE=1 SV=1	RAT	8	1	0.990832	1.00925	1	0.00651268	1.00002
1350	13.99	18.52	60.64	45.74	36.17	sp|P85515|ACTZ_RAT	Alpha-centractin OS=Rattus norvegicus GN=Actr1a PE=1 SV=1	RAT	17	1.04713	1.08643	1.02802	1.05682	0.0200046	1.0546
1351	13.95	15.19	47.51	38.42	32.55	tr|F7FM32|F7FM32_RAT	Protein RGD1311345 OS=Rattus norvegicus GN=RGD1311345 PE=1 SV=1	RAT	10	1.24738	1.0666	1.10662	0.954993	0.095616	1.0939
1352	13.93	16.33	49.28	44.98	40.19	tr|D3ZPW7|D3ZPW7_RAT	Glutathione peroxidase OS=Rattus norvegicus GN=Gpx8 PE=3 SV=1	RAT	10	1.22462	1.1272	1.11686	1.03753	0.0589413	1.12655
1353	13.93	14.27	31.28	28.97	21.03	tr|B2RZC6|B2RZC6_RAT	Ilf2 protein OS=Rattus norvegicus GN=Ilf2 PE=1 SV=1	RAT	11	1	1.02802	0.937562	0.963829	0.0350642	0.982352
1354	13.92	14.08	45.12	36.7	31.31	sp|Q499N6|UBXN1_RAT	UBX domain-containing protein 1 OS=Rattus norvegicus GN=Ubxn1 PE=3 SV=2	RAT	8	0.981748	1.00925	0.954993	0.981748	0.0195378	0.981935
1355	13.9	29.84	38.94	27.53	20.92	tr|G3V9U7|G3V9U7_RAT	Calcium-transporting ATPase OS=Rattus norvegicus GN=Atp2a3 PE=1 SV=1	RAT	23	0.963829	1.10662	0.990832	1.13763	0.0703443	1.04973
1356	13.9	16.76	26.68	13.58	9.356	tr|F1LM60|F1LM60_RAT	Protein Arap1 OS=Rattus norvegicus GN=Arap1 PE=1 SV=1	RAT	14	0.946237	0.981748	0.972747	1.00925	0.0230251	0.977496
1357	13.89	14.65	51.6	40.93	32.38	tr|Q5RK08|Q5RK08_RAT	Glioblastoma amplified sequence OS=Rattus norvegicus GN=Gbas PE=1 SV=1	RAT	10	0.937562	1.15878	0.660693	0.831764	0.201142	0.897199
1358	13.89	14.02	34.22	26.67	21.33	tr|Q68FQ9|Q68FQ9_RAT	LanC lantibiotic synthetase component C-like 2 (Bacterial) OS=Rattus norvegicus GN=Lancl2 PE=1 SV=1	RAT	8	0.928966	0.981748	0.928966	0.990832	0.0301173	0.957628
1359	13.87	22.3	58.13	45.67	42.91	tr|F1LPS8|F1LPS8_RAT	Transcriptional activator protein Pur-alpha OS=Rattus norvegicus GN=Pura PE=1 SV=3	RAT	15	0.990832	0.990832	0.946237	0.946237	0.0230218	0.968535
1360	13.87	14.16	40.8	34.97	32.52	tr|Q4FZS2|Q4FZS2_RAT	Budding uninhibited by benzimidazoles 3 homolog (S. cerevisiae) OS=Rattus norvegicus GN=Bub3 PE=1 SV=1	RAT	10	0.801678	0.870964	0.824138	0.879023	0.0381165	0.843951
1361	13.86	15.5	26.32	12.45	7.937	tr|G3V7I3|G3V7I3_RAT	Cation-transporting ATPase OS=Rattus norvegicus GN=Atp13a1 PE=1 SV=1	RAT	10	1.00925	1.13763	1.05682	1.19124	0.0640892	1.09873
1362	13.86	14.04	59.72	55.92	42.65	tr|A0A0G2K3I9|A0A0G2K3I9_RAT	MAGUK p55 subfamily member 3 OS=Rattus norvegicus GN=Dusp3 PE=1 SV=1	RAT	10	0.972747	0.887156	0.809096	0.744732	0.100036	0.853433
1363	13.83	18.38	54.73	44.44	39.51	sp|P35284|RAB12_RAT	Ras-related protein Rab-12 OS=Rattus norvegicus GN=Rab12 PE=1 SV=2	RAT	14	0.963829	1.02802	0.879023	0.946237	0.0555904	0.954276
1364	13.83	16.63	41.02	25.6	15.9	sp|Q5BJT7|CCD93_RAT	Coiled-coil domain-containing protein 93 OS=Rattus norvegicus GN=Ccdc93 PE=1 SV=1	RAT	13	0.772681	1.31826	0.666807	1.1695	0.274901	0.981811
1365	13.81	15.75	36.08	26.6	21.65	sp|Q5M7T9|THNS2_RAT	Threonine synthase-like 2 OS=Rattus norvegicus GN=Thnsl2 PE=2 SV=1	RAT	10	1	1.03753	1.00925	1.04713	0.0189858	1.02348
1366	13.81	14.02	36.57	26.74	21.03	tr|D4A9U4|D4A9U4_RAT	Elastin OS=Rattus norvegicus GN=Eln PE=1 SV=2	RAT	17	0.972747	0.937562	0.954993	0.92045	0.0205937	0.946438
1367	13.8	17.22	23.21	12.85	6.275	tr|D4A7R3|D4A7R3_RAT	Nucleoporin 205kDa (Predicted) OS=Rattus norvegicus GN=Nup205 PE=1 SV=1	RAT	16	0.963829	0.963829	0.981748	0.981748	0.00921006	0.972788
1368	13.8	15.21	34.92	24.07	20.37	sp|Q9QX79|FETUB_RAT	Fetuin-B OS=Rattus norvegicus GN=Fetub PE=2 SV=2	RAT	10	0.765597	1	0.636796	0.831764	0.161894	0.808539
1369	13.79	13.91	45.31	35.93	22.88	sp|Q6YAT4|SGCE_RAT	Epsilon-sarcoglycan OS=Rattus norvegicus GN=Sgce PE=2 SV=1	RAT	14	0.954993	0.946237	0.963829	0.954993	0.00651269	0.955013
1370	13.79	13.88	86.84	80.7	72.81	tr|B5DFD8|B5DFD8_RAT	SH3 domain-binding glutamic acid-rich-like protein OS=Rattus norvegicus GN=Sh3bgrl PE=1 SV=1	RAT	9	1.20226	0.954993	1.30617	1.0666	0.117542	1.13251
1371	13.78	18.09	52.12	33.05	24.36	sp|Q6IRK9|CBPQ_RAT	Carboxypeptidase Q OS=Rattus norvegicus GN=Cpq PE=1 SV=1	RAT	12	1.01859	0.954993	0.963829	0.912011	0.0394093	0.962356
1372	13.77	15.04	29.65	17.25	8.915	sp|Q62780|DDX46_RAT	Probable ATP-dependent RNA helicase DDX46 OS=Rattus norvegicus GN=Ddx46 PE=1 SV=1	RAT	10	1.03753	0.903649	1.14815	1.00925	0.0849371	1.02465
1373	13.77	13.96	52.94	46.71	26.64	tr|F7EPH4|F7EPH4_RAT	Protein Sar1a OS=Rattus norvegicus GN=Ppa1 PE=1 SV=1	RAT	7	0.981748	1.1272	1	1.14815	0.0695831	1.06427
1374	13.73	18.82	38.26	32.21	20.13	sp|Q5QJC9|BAG5_RAT	BAG family molecular chaperone regulator 5 OS=Rattus norvegicus GN=Bag5 PE=1 SV=1	RAT	11	0.946237	0.83946	0.801678	0.704693	0.105067	0.823017
1375	13.72	13.82	60.7	49.75	43.28	sp|Q63524|TMED2_RAT	Transmembrane emp24 domain-containing protein 2 OS=Rattus norvegicus GN=Tmed2 PE=1 SV=1	RAT	9	0.946237	0.981748	0.92045	0.954993	0.0230251	0.950857
1376	13.71	16.27	26.33	14.24	9.221	tr|F1LPH3|F1LPH3_RAT	Peptidyl-glycine alpha-amidating monooxygenase OS=Rattus norvegicus GN=Pam PE=1 SV=3	RAT	11	1.02802	1.04713	1.01859	1.03753	0.0102973	1.03282
1377	13.71	14.66	35.03	19.8	13.03	tr|A0A0G2K509|A0A0G2K509_RAT	Keratin, type II cytoskeletal 5 OS=Rattus norvegicus GN=Krt5 PE=1 SV=1	RAT	9	1.01859	1.01859	0.937562	0.937562	0.0414228	0.978077
1378	13.68	18.07	30.3	19.36	15.66	tr|F1LX28|F1LX28_RAT	Protein Acot11 OS=Rattus norvegicus GN=Acot11 PE=4 SV=3	RAT	11	0.654636	1.38038	0.559758	1.14815	0.36367	0.935733
1379	13.68	14.72	40.6	30.73	21.33	sp|Q9JHL4|DBNL_RAT	Drebrin-like protein OS=Rattus norvegicus GN=Dbnl PE=1 SV=1	RAT	10	0.963829	1	0.946237	0.972747	0.0200046	0.970703
1380	13.68	14.12	26.65	15.8	12.5	sp|P17945|HGF_RAT	Hepatocyte growth factor OS=Rattus norvegicus GN=Hgf PE=1 SV=1	RAT	9	1.20226	1.21339	1.13763	1.14815	0.0280055	1.17536
1381	13.67	14.49	53.35	35.2	27.65	sp|Q6TUG0|DJB11_RAT	DnaJ homolog subfamily B member 11 OS=Rattus norvegicus GN=Dnajb11 PE=2 SV=1	RAT	9	0.972747	1	1.00925	1.03753	0.0230251	1.00488
1382	13.66	14.33	83.85	76.92	64.62	sp|P62246|RS15A_RAT	40S ribosomal protein S15a OS=Rattus norvegicus GN=Rps15a PE=1 SV=2	RAT	14	0.990832	0.981748	0.990832	0.972747	0.00762236	0.98404
1383	13.65	15.21	25.16	12.53	6.592	tr|B5DEZ4|B5DEZ4_RAT	Protein Tcerg1 OS=Rattus norvegicus GN=Tcerg1 PE=1 SV=1	RAT	8	0.990832	0.937562	1.13763	1.08643	0.0755171	1.03811
1384	13.64	14.89	63.36	59.05	53.88	tr|G3V8U9|G3V8U9_RAT	Proteasome subunit beta type OS=Rattus norvegicus GN=Psmb4 PE=1 SV=2	RAT	14	0.981748	0.963829	1	0.981748	0.0130253	0.981831
1385	13.63	14.41	28.44	20.82	15.65	tr|A0A0G2JSM7|A0A0G2JSM7_RAT	Adducin 1 (Alpha), isoform CRA_b OS=Rattus norvegicus GN=Add1 PE=1 SV=1	RAT	9	1.04713	1.05682	1.03753	1.04713	0.0065127	1.04715
1386	13.63	14.09	34.11	26.48	22.67	tr|Q6DGF2|Q6DGF2_RAT	Enthoprotin OS=Rattus norvegicus GN=Clint1 PE=1 SV=1	RAT	10	1.0666	1.00925	1.00925	0.954993	0.0390737	1.01002
1387	13.61	14.12	51.71	47.44	38.46	sp|P17220|PSA2_RAT	Proteasome subunit alpha type-2 OS=Rattus norvegicus GN=Psma2 PE=1 SV=3	RAT	8	1.05682	1.07647	0.954993	0.972747	0.0514469	1.01526
1388	13.56	24.72	51.76	48.56	40.26	tr|Q6P6G9|Q6P6G9_RAT	Heterogeneous nuclear ribonucleoprotein A1 OS=Rattus norvegicus GN=Hnrnpa1 PE=1 SV=1	RAT	21	0.972747	1.02802	0.972747	1.01859	0.0255475	0.998026
1389	13.55	15.58	38.25	22.01	16.23	tr|A0A0G2JZG7|A0A0G2JZG7_RAT	Serine--tRNA ligase, cytoplasmic OS=Rattus norvegicus GN=Sars PE=1 SV=1	RAT	9	1.01859	1.00925	1.05682	1.04713	0.0189858	1.03295
1390	13.54	25.6	87.95	86.75	74.1	sp|P45592|COF1_RAT	Cofilin-1 OS=Rattus norvegicus GN=Cfl1 PE=1 SV=3	RAT	29	0.847227	0.928966	0.946237	1.03753	0.071916	0.93999
1391	13.54	13.6	57.14	50.95	41.43	sp|Q6DGG1|ABHEB_RAT	Alpha/beta hydrolase domain-containing protein 14B OS=Rattus norvegicus GN=Abhd14b PE=2 SV=1	RAT	8	0.972747	0.912011	1.01859	0.946237	0.04046	0.962397
1392	13.52	20.59	30.21	20.54	14.43	tr|F1LS98|F1LS98_RAT	Protein kinase C OS=Rattus norvegicus GN=Prkca PE=1 SV=3	RAT	11	1.03753	0.954993	1.02802	0.954993	0.0392753	0.993882
1393	13.5	19.22	37.43	22.19	16.31	tr|G3V9K0|G3V9K0_RAT	Cysteinyl-tRNA synthetase (Predicted), isoform CRA_b OS=Rattus norvegicus GN=Cars PE=1 SV=1	RAT	11	1.01859	1.00925	1.04713	1.02802	0.0136623	1.02575
1394	13.48	17.5	30.54	16.31	7.852	tr|F1M1B3|F1M1B3_RAT	Protein RGD1564420 OS=Rattus norvegicus GN=RGD1564420 PE=1 SV=2	RAT	11	0.946237	0.903649	1.04713	1	0.0556156	0.974254
1395	13.48	15.61	31.09	21.18	11.96	tr|D3ZMS1|D3ZMS1_RAT	Protein Sf3b2 OS=Rattus norvegicus GN=Sf3b2 PE=1 SV=3	RAT	12	1.10662	0.879023	1.10662	0.879023	0.114623	0.992823
1396	13.48	13.73	45.17	34.99	25.59	sp|Q920Q0|PALM_RAT	Paralemmin-1 OS=Rattus norvegicus GN=Palm PE=1 SV=1	RAT	8	1.10662	1.02802	0.963829	0.887156	0.0811371	0.996406
1397	13.47	16.54	59.3	54.99	38.81	tr|A0A0G2JSV0|A0A0G2JSV0_RAT	N-myc downstream regulated gene 2, isoform CRA_a OS=Rattus norvegicus GN=Ndrg2 PE=1 SV=1	RAT	12	1.11686	1.1272	0.77983	0.77983	0.17997	0.95093
1398	13.47	13.68	54.51	40.57	32.79	tr|Q3KRE2|Q3KRE2_RAT	Methyltransferase like 7A OS=Rattus norvegicus GN=Mettl7a PE=1 SV=1	RAT	9	1.01859	0.981748	1.01859	0.981748	0.0184186	1.00017
1399	13.46	15.77	26.89	20.27	15.34	sp|Q641X3|HEXA_RAT	Beta-hexosaminidase subunit alpha OS=Rattus norvegicus GN=Hexa PE=2 SV=1	RAT	9	1.00925	1.05682	1.05682	1.10662	0.032562	1.05738
1400	13.45	14.01	29.44	25.7	18.93	tr|A0A0G2K8T0|A0A0G2K8T0_RAT	Acid ceramidase OS=Rattus norvegicus GN=Asah1 PE=1 SV=1	RAT	8	1.02802	1.03753	0.972747	0.981748	0.0280055	1.00501
1401	13.44	13.57	54.21	38.63	32.09	tr|D3ZDK7|D3ZDK7_RAT	Protein Pgp OS=Rattus norvegicus GN=Pgp PE=1 SV=1	RAT	8	0.691831	0.895365	0.765597	1	0.141341	0.838198
1402	13.43	13.59	28.92	15.81	12.47	tr|D4A2Y7|D4A2Y7_RAT	N-acetylated alpha-linked acidic dipeptidase 2 (Predicted), isoform CRA_a OS=Rattus norvegicus GN=Naalad2 PE=4 SV=1	RAT	8	1.04713	1.04713	1.00925	1.00925	0.0184186	1.02819
1403	13.41	18.15	42.62	35.41	31.48	sp|Q64620|PPP6_RAT	Serine/threonine-protein phosphatase 6 catalytic subunit OS=Rattus norvegicus GN=Ppp6c PE=2 SV=2	RAT	12	0.963829	1.00925	0.963829	1.00925	0.0230218	0.986541
1404	13.4	16.79	76.33	56.8	47.93	sp|P10888|COX41_RAT	Cytochrome c oxidase subunit 4 isoform 1, mitochondrial OS=Rattus norvegicus GN=Cox4i1 PE=1 SV=1	RAT	12	0.972747	0.972747	0.946237	0.954993	0.0119488	0.961681
1405	13.4	14.67	35.3	24.01	16.49	tr|F1LQN1|F1LQN1_RAT	Polypeptide N-acetylgalactosaminyltransferase OS=Rattus norvegicus GN=Galnt16 PE=3 SV=1	RAT	9	0.981748	1.0666	0.787046	0.862979	0.11617	0.924592
1406	13.39	14.89	53.09	40.72	30.41	sp|P29314|RS9_RAT	40S ribosomal protein S9 OS=Rattus norvegicus GN=Rps9 PE=1 SV=4	RAT	11	0.981748	1.02802	0.963829	1.00925	0.0247966	0.995712
1407	13.38	13.51	55.84	51.3	50.65	sp|P07632|SODC_RAT	Superoxide dismutase [Cu-Zn] OS=Rattus norvegicus GN=Sod1 PE=1 SV=2	RAT	10	1	0.831764	0.831764	0.691831	0.13016	0.83884
1408	13.35	14.45	48.65	34.64	20.88	sp|P24268|CATD_RAT	Cathepsin D OS=Rattus norvegicus GN=Ctsd PE=1 SV=1	RAT	14	0.737904	1.00925	0.666807	0.903649	0.162508	0.829403
1409	13.33	16.07	24.32	12.03	6.477	sp|P81128|RHG35_RAT	Rho GTPase-activating protein 35 OS=Rattus norvegicus GN=Arhgap35 PE=1 SV=2	RAT	12	0.981748	0.990832	1	1.00925	0.0102973	0.995458
1410	13.33	14.24	53.94	49.38	34.02	tr|Q6AXR6|Q6AXR6_RAT	Glutathione S-transferase omega 1 OS=Rattus norvegicus GN=Gsto1 PE=1 SV=1	RAT	10	1.1695	1.21339	0.972747	1.01859	0.0918345	1.09356
1411	13.3	14.03	44.3	30.8	28.69	tr|Q5RK17|Q5RK17_RAT	Diablo homolog (Drosophila) OS=Rattus norvegicus GN=Diablo PE=1 SV=1	RAT	7	1.05682	1.02802	1.05682	1.02802	0.0138146	1.04242
1412	13.29	15.99	33.93	25.79	18.06	sp|Q9JMJ4|PRP19_RAT	Pre-mRNA-processing factor 19 OS=Rattus norvegicus GN=Prpf19 PE=1 SV=2	RAT	9	0.928966	0.870964	0.895365	0.83946	0.0371221	0.883689
1413	13.28	14.21	29.77	22.29	13.59	tr|A0A0G2JXT6|A0A0G2JXT6_RAT	Protein Mtmr6 OS=Rattus norvegicus GN=Mtmr6 PE=1 SV=1	RAT	7	0.937562	0.937562	0.990832	0.981748	0.0255474	0.961926
1414	13.25	16.01	25.3	15.34	6.759	tr|D3Z8B2|D3Z8B2_RAT	Protein Nup133 OS=Rattus norvegicus GN=Nup133 PE=1 SV=3	RAT	10	0.981748	0.946237	1.01859	0.990832	0.0262656	0.984352
1415	13.2	18.76	28.15	16.21	8.939	tr|F1M1D5|F1M1D5_RAT	Protein Tbcd OS=Rattus norvegicus GN=Tbcd PE=1 SV=3	RAT	12	0.972747	0.981748	0.981748	1	0.0100695	0.984061
1416	13.2	17.61	51.15	40	31.8	tr|G3V9S0|G3V9S0_RAT	NADH-cytochrome b5 reductase OS=Rattus norvegicus GN=Cyb5r1 PE=1 SV=1	RAT	11	0.809096	1.04713	0.711214	0.912011	0.143196	0.869862
1417	13.2	17.36	60.68	57.77	50.97	sp|Q5EB77|RAB18_RAT	Ras-related protein Rab-18 OS=Rattus norvegicus GN=Rab18 PE=2 SV=1	RAT	12	1.03753	1.0666	1.00925	1.03753	0.0195378	1.03773
1418	13.2	15.7	25.97	15.56	11.17	tr|F1M836|F1M836_RAT	MAP/microtubule affinity-regulating kinase 3 OS=Rattus norvegicus GN=Mark3 PE=1 SV=1	RAT	9	0.879023	1.27057	0.758578	1.08643	0.196219	0.99865
1419	13.2	15.62	38.19	29.89	19.37	tr|A0A0G2JU25|A0A0G2JU25_RAT	Polypeptide N-acetylgalactosaminyltransferase OS=Rattus norvegicus GN=Galnt2 PE=1 SV=1	RAT	11	1.28233	1.2942	1.11686	1.11686	0.0713498	1.20256
1420	13.18	13.39	32.71	25.27	19.95	tr|D3ZFF4|D3ZFF4_RAT	Protein Lclat1 OS=Rattus norvegicus GN=Lclat1 PE=1 SV=1	RAT	7	0.954993	0.954993	0.937562	0.937562	0.00921009	0.946277
1421	13.17	13.28	62.42	61.07	53.02	tr|A0A0G2K586|A0A0G2K586_RAT	Fatty acid-binding protein, adipocyte OS=Rattus norvegicus GN=Fabp4 PE=1 SV=1	RAT	9	1.6293	1.75388	1.45881	1.57036	0.0663919	1.60309
1422	13.17	13.21	45.38	42.86	41.18	tr|A0A0G2JSL0|A0A0G2JSL0_RAT	Proteasome subunit beta type OS=Rattus norvegicus GN=rCG_63409 PE=3 SV=1	RAT	10	1.0666	1.05682	1.03753	1.02802	0.0145621	1.04724
1423	13.15	19.5	30.24	18.95	11.83	tr|A0A0G2JVI5|A0A0G2JVI5_RAT	Actin filament-associated protein 1 OS=Rattus norvegicus GN=Afap1 PE=1 SV=1	RAT	14	0.794328	0.801678	1.1272	1.1695	0.180676	0.973176
1424	13.15	16.06	46.57	31.14	28.29	tr|M0RDI5|M0RDI5_RAT	Protein Mcu OS=Rattus norvegicus GN=Mcu PE=1 SV=1	RAT	12	1.00925	0.972747	0.954993	0.92045	0.0332053	0.964361
1425	13.15	13.36	81.55	65.05	50.49	sp|P62804|H4_RAT	Histone H4 OS=Rattus norvegicus GN=Hist1h4b PE=1 SV=2	RAT	45	0.809096	0.77983	0.630957	0.586138	0.13523	0.701505
1426	13.15	13.19	98.21	91.96	91.96	sp|P83941|ELOC_RAT	Transcription elongation factor B polypeptide 1 OS=Rattus norvegicus GN=Tceb1 PE=1 SV=1	RAT	7	0.963829	0.972747	0.928966	0.937562	0.0189858	0.950776
1427	13.14	13.36	24.54	14.76	12.6	tr|A0A0H2UI19|A0A0H2UI19_RAT	Coagulation factor XII OS=Rattus norvegicus GN=F12 PE=1 SV=1	RAT	8	0.887156	0.772681	0.847227	0.737904	0.0727261	0.811242
1428	13.12	20.6	28.96	16.07	9.299	tr|A0A0G2K3L9|A0A0G2K3L9_RAT	Protein Ppfia1 OS=Rattus norvegicus GN=Ppfia1 PE=1 SV=1	RAT	14	1	0.937562	1.03753	0.972747	0.0371221	0.986959
1429	13.11	15.37	31.98	22.22	21.14	sp|O08618|KPRB_RAT	Phosphoribosyl pyrophosphate synthase-associated protein 2 OS=Rattus norvegicus GN=Prpsap2 PE=1 SV=1	RAT	8	1.03753	1.05682	1.02802	1.04713	0.0102973	1.04237
1430	13.09	13.35	75.32	64.94	47.4	sp|B0BN18|PFD2_RAT	Prefoldin subunit 2 OS=Rattus norvegicus GN=Pfdn2 PE=2 SV=1	RAT	8	1.02802	1.01859	0.928966	0.928966	0.0484424	0.976135
1431	13.08	15.16	48.59	35.92	32.04	tr|Q5XI04|Q5XI04_RAT	Protein Stom OS=Rattus norvegicus GN=Stom PE=1 SV=1	RAT	9	0.83946	0.887156	0.855067	0.903649	0.02912	0.871333
1432	13.06	14.21	33.27	23.62	17.13	sp|Q505J8|SYFA_RAT	Phenylalanine--tRNA ligase alpha subunit OS=Rattus norvegicus GN=Farsa PE=1 SV=1	RAT	8	1.51356	1.31826	1.2942	1.03753	0.131084	1.29089
1433	13.04	23.78	28.85	18.37	14.62	tr|A0A0G2JWH5|A0A0G2JWH5_RAT	Protein Stt3a OS=Rattus norvegicus GN=Stt3a PE=1 SV=1	RAT	15	0.954993	0.937562	0.972747	0.963829	0.0135817	0.957283
1434	13.03	15.5	31.47	25.86	15.95	tr|A4GW50|A4GW50_RAT	Protein Stk38l OS=Rattus norvegicus GN=Stk38l PE=1 SV=1	RAT	9	0.981748	1.05682	1.00925	1.08643	0.039334	1.03356
1435	13.02	19.47	14.25	6.667	3.962	tr|A0A096MIS8|A0A096MIS8_RAT	Serine/threonine-protein kinase WNK1 OS=Rattus norvegicus GN=Wnk1 PE=1 SV=2	RAT	13	1.00925	1.0666	1.01859	1.0666	0.0255159	1.04026
1436	13.02	13.36	19.47	10.38	5.982	tr|D3ZF26|D3ZF26_RAT	Protein Tnks1bp1 OS=Rattus norvegicus GN=Tnks1bp1 PE=1 SV=1	RAT	7	0.981748	0.963829	0.990832	0.972747	0.0102973	0.977289
1437	13	30.67	22.14	10.84	4.848	tr|F1M0Z1|F1M0Z1_RAT	Protein Trio OS=Rattus norvegicus GN=Trio PE=1 SV=3	RAT	20	0.972747	0.928966	1.04713	1	0.0434371	0.987211
1438	12.99	30.69	25.14	17.62	8.441	tr|A0A0G2K3S4|A0A0G2K3S4_RAT	Protein Abca9 OS=Rattus norvegicus GN=Abca9 PE=1 SV=1	RAT	19	0.946237	0.954993	1	1.00925	0.0280055	0.977621
1439	12.94	13.3	54.01	45.15	35.86	sp|Q5U1X1|ORN_RAT	Oligoribonuclease, mitochondrial OS=Rattus norvegicus GN=Rexo2 PE=2 SV=1	RAT	8	1.15878	1.20226	1.0666	1.09648	0.0467636	1.13103
1440	12.92	14.11	57.38	42.21	28.69	sp|Q91ZW1|TFAM_RAT	Transcription factor A, mitochondrial OS=Rattus norvegicus GN=Tfam PE=2 SV=1	RAT	7	0.903649	0.937562	0.887156	0.92045	0.0205937	0.912204
1441	12.88	13.43	64.71	58.82	42.53	sp|Q6AYQ8|FAHD1_RAT	Acylpyruvase FAHD1, mitochondrial OS=Rattus norvegicus GN=Fahd1 PE=1 SV=1	RAT	10	0.928966	1.11686	0.847227	1.01859	0.102815	0.977912
1442	12.87	15.91	32.21	18.52	11.81	tr|A0A0G2K761|A0A0G2K761_RAT	Protein Cul2 OS=Rattus norvegicus GN=Cul2 PE=1 SV=1	RAT	12	0.758578	0.436516	0.654636	0.390841	0.271119	0.560143
1443	12.85	12.94	51.54	29.96	22.91	tr|D3ZUX5|D3ZUX5_RAT	Coiled-coil-helix-coiled-coil-helix domain containing 3 (Predicted), isoform CRA_a OS=Rattus norvegicus GN=Chchd3 PE=1 SV=1	RAT	7	0.981748	0.937562	0.963829	0.92045	0.0247966	0.950897
1444	12.84	15.19	37.77	29.18	22.96	sp|B5DF94|SRPX2_RAT	Sushi repeat-containing protein SRPX2 OS=Rattus norvegicus GN=Srpx2 PE=1 SV=1	RAT	13	0.816582	0.816582	1.13763	1.13763	0.164284	0.977105
1445	12.83	13.23	31.74	23.31	21.91	sp|Q3B7D1|UBE2Z_RAT	Ubiquitin-conjugating enzyme E2 Z OS=Rattus norvegicus GN=Ube2z PE=1 SV=2	RAT	7	0.954993	0.981748	0.946237	0.972747	0.0145621	0.963931
1446	12.82	13.58	42.64	34.36	29.45	tr|D3ZFQ8|D3ZFQ8_RAT	Cytochrome c-1 (Predicted), isoform CRA_c OS=Rattus norvegicus GN=Cyc1 PE=1 SV=3	RAT	11	0.990832	1.02802	0.912011	0.946237	0.0453396	0.969274
1447	12.82	13.51	38.54	31.56	21.26	sp|Q4KLL0|TCEA1_RAT	Transcription elongation factor A protein 1 OS=Rattus norvegicus GN=Tcea1 PE=1 SV=1	RAT	8	0.972747	0.895365	1.04713	0.963829	0.0554458	0.969767
1448	12.81	13.81	39.83	26.77	13.06	tr|A0A0G2JTA1|A0A0G2JTA1_RAT	Protein Ppp2r5e OS=Rattus norvegicus GN=Ppp2r5e PE=1 SV=1	RAT	6	1.00925	1.10662	0.972747	1.0666	0.0495755	1.03881
1449	12.8	13.41	68.25	59.79	45.5	tr|F1M229|F1M229_RAT	Protein Igkc OS=Rattus norvegicus GN=Igkc PE=1 SV=3	RAT	18	1.10662	0.328095	0.946237	0.277971	0.551418	0.664732
1450	12.78	16.76	34.31	27.62	18.2	sp|P27615|SCRB2_RAT	Lysosome membrane protein 2 OS=Rattus norvegicus GN=Scarb2 PE=1 SV=2	RAT	14	0.946237	1.00925	0.937562	1	0.0325528	0.973263
1451	12.78	13.88	37.04	27.01	18.43	sp|Q6AYK8|EIF3D_RAT	Eukaryotic translation initiation factor 3 subunit D OS=Rattus norvegicus GN=Eif3d PE=1 SV=1	RAT	8	1.04713	1.05682	1.01859	1.02802	0.0145621	1.03764
1452	12.78	12.97	28.33	19.06	14	tr|M0R9L3|M0R9L3_RAT	Sorting nexin OS=Rattus norvegicus GN=Snx9 PE=1 SV=2	RAT	10	1.01859	1.00925	0.990832	0.990832	0.0119794	1.00238
1453	12.77	16.84	24.15	13.53	6.602	sp|Q64649|KPB1_RAT	Phosphorylase b kinase regulatory subunit alpha, skeletal muscle isoform OS=Rattus norvegicus GN=Phka1 PE=1 SV=2	RAT	11	1.00925	1.01859	0.981748	0.990832	0.0145621	1.00011
1454	12.76	14.46	37.18	25.99	16.97	tr|Q5EBC7|Q5EBC7_RAT	Rab GTPase-binding effector protein 2 OS=Rattus norvegicus GN=Rabep2 PE=1 SV=1	RAT	12	1.07647	1.08643	1.05682	1.0666	0.0102973	1.07158
1455	12.76	13.83	39.17	29.38	21.96	sp|Q9JLZ1|GLRX3_RAT	Glutaredoxin-3 OS=Rattus norvegicus GN=Glrx3 PE=1 SV=2	RAT	12	0.92045	1.04713	0.954993	1.07647	0.0640891	0.999759
1456	12.74	13.24	46.91	43.27	41.82	tr|G3V8Z9|G3V8Z9_RAT	COP9 (Constitutive photomorphogenic) homolog, subunit 7a (Arabidopsis thaliana) (Predicted) OS=Rattus norvegicus GN=Cops7a PE=1 SV=1	RAT	11	0.990832	1.01859	1.05682	1.07647	0.0320732	1.03568
1457	12.72	17.05	36.51	27.21	20.93	sp|P51607|RENBP_RAT	N-acylglucosamine 2-epimerase OS=Rattus norvegicus GN=Renbp PE=2 SV=2	RAT	10	1.18032	0.887156	1.28233	0.963829	0.147841	1.07841
1458	12.71	21.59	37.92	24.97	12.25	tr|D3ZD89|D3ZD89_RAT	NMDA receptor-regulated gene 1 (Predicted), isoform CRA_b OS=Rattus norvegicus GN=Naa15 PE=1 SV=2	RAT	13	1	1	1.04713	1.04713	0.0230218	1.02356
1459	12.7	12.72	34.72	30.27	27.3	tr|G3V6D9|G3V6D9_RAT	Na(+)/H(+) exchange regulatory cofactor NHE-RF OS=Rattus norvegicus GN=Slc9a3r2 PE=1 SV=1	RAT	6	1.0666	1.00925	1.01859	0.963829	0.0359652	1.01457
1460	12.66	17.1	39.81	30.83	20.87	sp|Q5XI97|AASD1_RAT	Alanyl-tRNA editing protein Aarsd1 OS=Rattus norvegicus GN=Aarsd1 PE=1 SV=1	RAT	9	0.990832	1.01859	0.928966	0.946237	0.0365441	0.971157
1461	12.66	14.35	45.45	34.91	26.18	tr|A0A0H2UHH2|A0A0H2UHH2_RAT	Serum amyloid P-component OS=Rattus norvegicus GN=Apcs PE=1 SV=1	RAT	8	0.559758	0.420727	0.731139	0.549541	0.195158	0.565291
1462	12.66	13.15	51.39	47.69	42.13	sp|P62828|RAN_RAT	GTP-binding nuclear protein Ran OS=Rattus norvegicus GN=Ran PE=1 SV=3	RAT	10	1.07647	1.07647	0.903649	0.895365	0.089604	0.987986
1463	12.65	14.77	40.23	33.82	31.49	sp|P81799|NAGK_RAT	N-acetyl-D-glucosamine kinase OS=Rattus norvegicus GN=Nagk PE=1 SV=4	RAT	11	1	1	0.963829	0.972747	0.0164269	0.984144
1464	12.63	14	25.08	16.37	11.41	tr|D3ZQP6|D3ZQP6_RAT	Protein Sema7a OS=Rattus norvegicus GN=Sema7a PE=4 SV=1	RAT	9	0.981748	1.0666	0.92045	0.990832	0.0524257	0.989906
1465	12.62	16.05	56.17	42.59	32.1	tr|F1M0L7|F1M0L7_RAT	Annexin OS=Rattus norvegicus GN=Anxa3 PE=1 SV=3	RAT	11	1.07647	1.04713	1.1272	1.09648	0.0268505	1.08682
1466	12.62	12.99	26.64	18.24	13.93	tr|G3V798|G3V798_RAT	Protein Srsf4 OS=Rattus norvegicus GN=Srsf4 PE=1 SV=1	RAT	10	1.1272	0.972747	0.928966	0.801678	0.121468	0.957647
1467	12.61	14.94	40.7	31.86	24.65	tr|A0A0G2K1M5|A0A0G2K1M5_RAT	Protein RGD1309079 OS=Rattus norvegicus GN=RGD1309079 PE=1 SV=1	RAT	10	0.972747	1	0.972747	1	0.0138146	0.986374
1468	12.59	18.18	27.15	18.64	10.88	sp|P18910|ANPRA_RAT	Atrial natriuretic peptide receptor 1 OS=Rattus norvegicus GN=Npr1 PE=1 SV=1	RAT	16	0.912011	0.954993	1.00925	1.05682	0.0556156	0.983268
1469	12.59	13.72	19.94	12.37	6.602	tr|D3ZU32|D3ZU32_RAT	Adhesion G protein-coupled receptor L2 OS=Rattus norvegicus GN=Adgrl2 PE=1 SV=3	RAT	7	1.03753	1.01859	1.05682	1.03753	0.0130253	1.03762
1470	12.58	19.16	35.91	29.98	20.47	tr|Q642B0|Q642B0_RAT	Glypican 4 OS=Rattus norvegicus GN=Gpc4 PE=1 SV=1	RAT	13	0.912011	0.937562	0.928966	0.963829	0.0200046	0.935592
1471	12.56	14.86	62.56	45.97	29.86	tr|D3ZRM9|D3ZRM9_RAT	Uncharacterized protein OS=Rattus norvegicus GN=LOC100360491 PE=4 SV=1	RAT	9	1.0666	1.34276	0.963829	1.21339	0.125435	1.14664
1472	12.56	14.85	38.81	31.84	21.89	sp|Q66H86|OLFL1_RAT	Olfactomedin-like protein 1 OS=Rattus norvegicus GN=Olfml1 PE=2 SV=1	RAT	9	1.13763	0.981748	0.847227	0.731139	0.164108	0.924435
1473	12.56	12.7	49.83	41.92	27.84	tr|Q3B8N9|Q3B8N9_RAT	Biphenyl hydrolase-like (Serine hydrolase) OS=Rattus norvegicus GN=Bphl PE=1 SV=1	RAT	7	1.08643	1.05682	1	0.972747	0.0436695	1.029
1474	12.54	12.61	42.73	34.36	24.23	tr|B4F764|B4F764_RAT	Cleavage and polyadenylation specific factor 5 OS=Rattus norvegicus GN=Nudt21 PE=1 SV=1	RAT	6	0.946237	0.698232	1.11686	0.847227	0.168696	0.90214
1475	12.52	18.87	27.91	16.33	8.129	sp|P37199|NU155_RAT	Nuclear pore complex protein Nup155 OS=Rattus norvegicus GN=Nup155 PE=1 SV=1	RAT	11	0.92045	0.990832	0.946237	1.01859	0.039334	0.969028
1476	12.52	14.9	27.1	15.27	12.86	tr|D3ZUX7|D3ZUX7_RAT	Protein Acsf3 OS=Rattus norvegicus GN=Acsf3 PE=1 SV=1	RAT	9	1	1.08643	1.00925	1.09648	0.0416785	1.04804
1477	12.51	25.75	66.11	54.33	41.59	sp|P05545|SPA3K_RAT	Serine protease inhibitor A3K OS=Rattus norvegicus GN=Serpina3k PE=1 SV=3	RAT	19	1.03753	0.972747	0.972747	0.912011	0.0455849	0.973758
1478	12.51	12.59	42.89	31.01	24.55	tr|D3ZDQ9|D3ZDQ9_RAT	Protein Sgca OS=Rattus norvegicus GN=Sgca PE=1 SV=1	RAT	10	0.946237	0.972747	1.01859	1.04713	0.039334	0.996176
1479	12.49	14.76	39.18	27.76	15.71	tr|D3Z9L0|D3Z9L0_RAT	Protein Agk OS=Rattus norvegicus GN=Agk PE=1 SV=2	RAT	7	0.903649	0.963829	0.928966	0.990832	0.0350642	0.946819
1480	12.48	13.37	37.77	28.53	19.84	sp|P50503|F10A1_RAT	Hsc70-interacting protein OS=Rattus norvegicus GN=St13 PE=1 SV=1	RAT	12	0.972747	1.01859	0.963829	1.00925	0.0234781	0.991105
1481	12.47	12.7	44.58	33.75	28.48	tr|A0A0G2K0V3|A0A0G2K0V3_RAT	3'(2'),5'-bisphosphate nucleotidase 1 OS=Rattus norvegicus GN=Bpnt1 PE=1 SV=1	RAT	8	1.02802	0.963829	1.13763	1.0666	0.0600237	1.04902
1482	12.46	14.32	32.37	23.09	17.53	tr|A0A0G2JUT7|A0A0G2JUT7_RAT	Protein B3glct OS=Rattus norvegicus GN=B3glct PE=1 SV=1	RAT	8	0.912011	1.09648	0.824138	0.981748	0.104468	0.953594
1483	12.45	14.71	56.44	48.89	38.22	tr|A0A0G2K531|A0A0G2K531_RAT	Glutathione peroxidase OS=Rattus norvegicus GN=Gpx3 PE=1 SV=1	RAT	13	0.870964	0.855067	0.630957	0.619441	0.160071	0.744107
1484	12.44	21.59	37.82	26.9	21.68	tr|Q566E4|Q566E4_RAT	Heterogeneous nuclear ribonucleoprotein R OS=Rattus norvegicus GN=Hnrnpr PE=1 SV=1	RAT	14	1	1	0.990832	0.990832	0.00460512	0.995416
1485	12.44	12.67	35.28	20	13.4	tr|B1H241|B1H241_RAT	Resistance to inhibitors of cholinesterase 8 homolog A (C. elegans) OS=Rattus norvegicus GN=Ric8a PE=1 SV=1	RAT	8	1.02802	0.963829	1.1272	1.05682	0.0561998	1.04397
1486	12.43	16.19	21.96	13.42	9.891	tr|G3V763|G3V763_RAT	Collagen alpha-1(V) chain OS=Rattus norvegicus GN=Col5a1 PE=1 SV=3	RAT	20	1.0666	1.04713	1.02802	1.01859	0.017729	1.04008
1487	12.42	16.58	28.17	15.02	8.075	tr|D3ZX42|D3ZX42_RAT	G protein-coupled receptor 21 (Predicted), isoform CRA_a OS=Rattus norvegicus GN=Rabgap1 PE=1 SV=1	RAT	12	1.03753	1.01859	1.02802	1.00925	0.0102973	1.02335
1488	12.42	13.44	53.41	39.24	25.61	tr|Q5I0F0|Q5I0F0_RAT	Developmentally regulated GTP binding protein 1 OS=Rattus norvegicus GN=Drg1 PE=1 SV=1	RAT	9	1.00925	1.02802	1.04713	1.0666	0.0205937	1.03775
1489	12.4	12.48	53.36	39.93	35.34	tr|A0A0G2K583|A0A0G2K583_RAT	Protein Mtap OS=Rattus norvegicus GN=Mtap PE=1 SV=1	RAT	8	0.990832	1.01859	1	1.02802	0.0145621	1.00936
1490	12.39	14.85	53.33	44.44	39.11	tr|B5DEN5|B5DEN5_RAT	Eukaryotic translation elongation factor 1 beta 2 OS=Rattus norvegicus GN=Eef1b2 PE=1 SV=1	RAT	10	0.981748	0.990832	0.928966	0.937562	0.0280055	0.959777
1491	12.38	15.89	39.29	24.6	19.05	tr|B1WC49|B1WC49_RAT	Api5 protein OS=Rattus norvegicus GN=Api5 PE=1 SV=1	RAT	10	0.937562	1	0.937562	0.990832	0.0301173	0.966489
1492	12.37	17.09	48.36	39.14	34.21	sp|Q63768|CRK_RAT	Adapter molecule crk OS=Rattus norvegicus GN=Crk PE=1 SV=1	RAT	11	0.963829	0.972747	0.981748	0.981748	0.00762233	0.975018
1493	12.37	14.25	35.63	31.17	25.1	tr|F7EL36|F7EL36_RAT	Acidic leucine-rich nuclear phosphoprotein 32 family member A OS=Rattus norvegicus GN=Anp32a PE=1 SV=2	RAT	9	0.92045	0.990832	0.92045	0.981748	0.0346943	0.95337
1494	12.34	14.36	31.65	26.21	16.7	tr|B2RYC9|B2RYC9_RAT	Glucosylceramidase OS=Rattus norvegicus GN=Gba PE=1 SV=1	RAT	8	0.928966	0.972747	0.928966	0.972747	0.0230218	0.950857
1495	12.33	71.84	95.42	90.49	80.63	tr|Q923Z2|Q923Z2_RAT	Tropomyosin 1, alpha, isoform CRA_a OS=Rattus norvegicus GN=Tpm1 PE=1 SV=1	RAT	89	0.937562	1.22462	0.630957	0.816582	0.239021	0.902429
1496	12.32	12.5	33.12	27.96	21.08	tr|B0BNN4|B0BNN4_RAT	Complement factor properdin OS=Rattus norvegicus GN=Cfp PE=1 SV=1	RAT	8	0.691831	0.510505	0.831764	0.619441	0.175897	0.663385
1497	12.31	18.57	24.15	14	6.457	tr|A0A0G2K8Z9|A0A0G2K8Z9_RAT	Kinesin-like protein OS=Rattus norvegicus GN=Kif13b PE=1 SV=1	RAT	12	0.981748	1.01859	0.912011	0.954993	0.0402151	0.966836
1498	12.3	16.5	26.13	17.73	9.141	tr|E9PTB2|E9PTB2_RAT	Transcription elongation factor SPT5 OS=Rattus norvegicus GN=Supt5h PE=1 SV=2	RAT	12	1.22462	0.758578	1.28233	0.794328	0.236181	1.01496
1499	12.27	19.27	48.35	38.22	26.45	tr|G3V9W6|G3V9W6_RAT	Aldehyde dehydrogenase OS=Rattus norvegicus GN=Aldh3a2 PE=1 SV=1	RAT	18	1.03753	1	0.946237	0.92045	0.0467636	0.976054
1500	12.27	13.1	46.3	35.05	23.79	sp|P32089|TXTP_RAT	Tricarboxylate transport protein, mitochondrial OS=Rattus norvegicus GN=Slc25a1 PE=1 SV=1	RAT	9	1.00925	1.01859	1.01859	1.03753	0.0100695	1.02099
1501	12.26	14.93	40.68	28.39	21.61	tr|A0A0H2UHE5|A0A0H2UHE5_RAT	Protein phosphatase 1A OS=Rattus norvegicus GN=Ppm1a PE=1 SV=1	RAT	9	0.946237	1.07647	0.870964	0.981748	0.0762681	0.968853
1502	12.24	17.28	27.36	20.52	12.07	tr|F1LV96|F1LV96_RAT	Protein Scube3 OS=Rattus norvegicus GN=Scube3 PE=4 SV=3	RAT	12	0.870964	0.972747	0.809096	0.903649	0.0663918	0.889114
1503	12.24	12.61	37.66	27.2	17.78	tr|Q68FX3|Q68FX3_RAT	DEAD (Asp-Glu-Ala-Asp) box polypeptide 19a OS=Rattus norvegicus GN=Ddx19a PE=1 SV=1	RAT	8	0.990832	1	0.946237	0.954993	0.0234781	0.973015
1504	12.22	13.08	53.75	45	33.33	tr|Q6PDW4|Q6PDW4_RAT	Proteasome subunit beta type OS=Rattus norvegicus GN=Psmb1 PE=1 SV=1	RAT	10	1.15878	1.20226	1.14815	1.1695	0.0173324	1.16967
1505	12.22	12.96	38.62	33.33	26.02	tr|A0A0H2UHA6|A0A0H2UHA6_RAT	Transmembrane protein 33 OS=Rattus norvegicus GN=Tmem33 PE=1 SV=1	RAT	9	1	0.990832	1.03753	1.02802	0.0189858	1.01409
1506	12.21	13.24	45.1	34.97	31.37	sp|B1WBW4|ARM10_RAT	Armadillo repeat-containing protein 10 OS=Rattus norvegicus GN=Armc10 PE=1 SV=1	RAT	12	1	1.04713	0.937562	0.981748	0.0396107	0.99161
1507	12.2	12.41	22.53	14.49	10.96	sp|Q496Z0|ELP2_RAT	Elongator complex protein 2 OS=Rattus norvegicus GN=Elp2 PE=2 SV=1	RAT	9	0.666807	0.963829	0.794328	1.1695	0.20985	0.898616
1508	12.19	16.83	42.74	36.16	22.47	sp|Q6AYE2|SHLB1_RAT	Endophilin-B1 OS=Rattus norvegicus GN=Sh3glb1 PE=2 SV=1	RAT	11	0.963829	0.981748	0.946237	0.954993	0.0136623	0.961702
1509	12.18	14.5	75.25	73.23	63.64	tr|A0A0G2JSH9|A0A0G2JSH9_RAT	Peroxiredoxin-2 OS=Rattus norvegicus GN=Prdx2 PE=1 SV=1	RAT	18	1.05682	1.00925	1.01859	0.963829	0.0326944	1.01212
1510	12.17	12.45	63.39	44.26	38.25	tr|Q5RJK5|Q5RJK5_RAT	Chromobox homolog 3 (HP1 gamma homolog, Drosophila) OS=Rattus norvegicus GN=Cbx3 PE=1 SV=1	RAT	7	1.01859	0.928966	0.954993	0.870964	0.0561998	0.943378
1511	12.17	12.42	41.47	24.19	15.21	tr|Q4VBH2|Q4VBH2_RAT	Protein LOC100911093 OS=Rattus norvegicus GN=Trnt1 PE=1 SV=1	RAT	6	1	0.990832	1.01859	1	0.0100695	1.00236
1512	12.15	12.57	40.63	23.84	16.79	sp|Q4V8K5|BROX_RAT	BRO1 domain-containing protein BROX OS=Rattus norvegicus GN=Brox PE=2 SV=1	RAT	7	0.954993	1	0.981748	1.01859	0.0237473	0.988833
1513	12.15	12.16	70.43	66.09	58.26	tr|D4A4D5|D4A4D5_RAT	Protein LOC100362751 OS=Rattus norvegicus GN=LOC498555 PE=3 SV=1	RAT	8	1	1.19124	0.801678	0.937562	0.142654	0.982621
1514	12.14	24.3	43.38	36.4	29.04	sp|P35465|PAK1_RAT	Serine/threonine-protein kinase PAK 1 OS=Rattus norvegicus GN=Pak1 PE=1 SV=3	RAT	15	1.28233	1.44544	1.04713	1.18032	0.117502	1.2388
1515	12.14	13.68	26.28	13.31	8.191	tr|F1M790|F1M790_RAT	Prostaglandin F2 receptor negative regulator OS=Rattus norvegicus GN=Ptgfrn PE=1 SV=3	RAT	8	0.751623	0.862979	0.765597	0.887156	0.0723029	0.816839
1516	12.13	15.26	30.65	14.17	6.165	tr|D3ZTF6|D3ZTF6_RAT	Phosphatidylinositol 3-kinase, C2 domain containing, alpha polypeptide (Predicted), isoform CRA_a OS=Rattus norvegicus GN=Pik3c2a PE=1 SV=1	RAT	11	0.619441	0.496592	1.10662	0.847227	0.303257	0.767471
1517	12.12	13.99	50.3	33.04	26.79	tr|B1WBS4|B1WBS4_RAT	Protein Vps26b OS=Rattus norvegicus GN=Vps26b PE=1 SV=1	RAT	9	0.937562	0.990832	0.912011	0.963829	0.0308881	0.951058
1518	12.12	12.66	39.74	29.36	19.65	tr|Q6IMX8|Q6IMX8_RAT	Acyl-CoA thioesterase 2 OS=Rattus norvegicus GN=Acot2 PE=1 SV=1	RAT	10	1.1272	1.18032	1.08643	1.13763	0.029486	1.13289
1519	12.12	12.57	71.23	67.81	53.42	sp|P62250|RS16_RAT	40S ribosomal protein S16 OS=Rattus norvegicus GN=Rps16 PE=1 SV=2	RAT	9	0.870964	0.963829	0.83946	0.928966	0.0538688	0.900805
1520	12.11	12.51	19.15	9.544	5.75	sp|Q5QD51|AKA12_RAT	A-kinase anchor protein 12 OS=Rattus norvegicus GN=Akap12 PE=1 SV=1	RAT	9	0.981748	0.990832	0.928966	0.937562	0.0280055	0.959777
1521	12.1	12.59	34.82	30.65	26.49	tr|G3V912|G3V912_RAT	Protein Tmx4 OS=Rattus norvegicus GN=Tmx4 PE=1 SV=1	RAT	10	0.981748	0.990832	0.981748	0.990832	0.00460516	0.98629
1522	12.1	12.15	56.06	43.43	36.36	tr|G3V6C3|G3V6C3_RAT	Protein Pbdc1 OS=Rattus norvegicus GN=Pbdc1 PE=1 SV=1	RAT	6	0.963829	0.954993	0.946237	0.928966	0.0135817	0.948506
1523	12.09	14.76	32.4	19.81	16.08	sp|Q07205|IF5_RAT	Eukaryotic translation initiation factor 5 OS=Rattus norvegicus GN=Eif5 PE=1 SV=1	RAT	9	0.981748	0.990832	0.981748	1	0.00765113	0.988582
1524	12.06	63.1	89.44	80.28	66.2	sp|P58775|TPM2_RAT	Tropomyosin beta chain OS=Rattus norvegicus GN=Tpm2 PE=1 SV=1	RAT	70	1.27057	1.47231	0.642688	0.77983	0.327626	1.04135
1525	12.04	13.37	20.37	14	10.61	tr|B5DEH7|B5DEH7_RAT	C1r protein OS=Rattus norvegicus GN=C1r PE=1 SV=1	RAT	11	0.963829	0.946237	1.05682	1.03753	0.0469337	1.0011
1526	12.04	12.94	28.88	21.02	14.81	tr|B5DF55|B5DF55_RAT	Protein Stam OS=Rattus norvegicus GN=Stam PE=1 SV=1	RAT	7	1.01859	1.00925	1.05682	1.04713	0.0189858	1.03295
1527	12.03	12.35	41.09	21.66	15.79	sp|P56522|ADRO_RAT	NADPH:adrenodoxin oxidoreductase, mitochondrial OS=Rattus norvegicus GN=Fdxr PE=1 SV=1	RAT	8	0.981748	1.01859	1.00925	1.03753	0.0198761	1.01178
1528	12.02	14.24	27.61	9.967	5.31	tr|D3Z9L5|D3Z9L5_RAT	Protein Wdr11 OS=Rattus norvegicus GN=Wdr11 PE=1 SV=2	RAT	8	1.04713	0.903649	0.787046	0.691831	0.154835	0.857414
1529	12.02	13.15	71.13	61.86	55.67	tr|D3ZS58|D3ZS58_RAT	NADH dehydrogenase [ubiquinone] 1 alpha subcomplex subunit 2 OS=Rattus norvegicus GN=Ndufa2 PE=1 SV=1	RAT	7	1	1	0.92045	0.92045	0.0414228	0.960225
1530	12.02	12.9	22.13	15.84	11.57	tr|E9PT53|E9PT53_RAT	Protein Wfs1 OS=Rattus norvegicus GN=Wfs1 PE=1 SV=2	RAT	11	0.912011	0.895365	0.912011	0.887156	0.0119488	0.901636
1531	12.01	13.31	47.81	33.06	29.23	tr|Q68FS8|Q68FS8_RAT	Protein Rtcd1 OS=Rattus norvegicus GN=Rtcd1 PE=1 SV=1	RAT	8	1.01859	1.02802	0.990832	1	0.0145621	1.00936
1532	12.01	12.22	33.94	21.95	17.42	tr|A0A096MJZ2|A0A096MJZ2_RAT	Protein Tbl2 OS=Rattus norvegicus GN=Tbl2 PE=1 SV=1	RAT	8	1.00925	0.981748	0.963829	0.937562	0.0268505	0.973098
1533	12.01	12.14	46.13	32.84	25.83	sp|B2RYG6|OTUB1_RAT	Ubiquitin thioesterase OTUB1 OS=Rattus norvegicus GN=Otub1 PE=1 SV=1	RAT	6	0.981748	0.946237	1	0.963829	0.0205937	0.972954
1534	12	35.81	82.11	72.76	69.51	sp|P35213|1433B_RAT	14-3-3 protein beta/alpha OS=Rattus norvegicus GN=Ywhab PE=1 SV=3	RAT	37	0.912011	1.09648	0.787046	0.937562	0.117973	0.933274
1535	12	24.62	32.17	22.9	15.81	sp|P27881|HXK2_RAT	Hexokinase-2 OS=Rattus norvegicus GN=Hk2 PE=1 SV=1	RAT	18	0.990832	1.08643	1.07647	1.19124	0.0654597	1.08624
1536	12	18.41	76.05	63.45	48.32	sp|Q63798|PSME2_RAT	Proteasome activator complex subunit 2 OS=Rattus norvegicus GN=Psme2 PE=2 SV=3	RAT	13	0.954993	0.862979	1.02802	0.928966	0.06262	0.943738
1537	12	14.33	31.65	18.58	15.6	tr|A0A0G2K8N6|A0A0G2K8N6_RAT	Protein Ankmy2 OS=Rattus norvegicus GN=Ankmy2 PE=1 SV=1	RAT	7	1.01859	1.02802	0.981748	0.990832	0.0189858	1.0048
1538	12	14.2	24.97	15.84	11.53	sp|Q6X936|KIRR1_RAT	Kin of IRRE-like protein 1 OS=Rattus norvegicus GN=Kirrel PE=1 SV=2	RAT	9	0.990832	1	1.01859	1.01859	0.0119488	1.007
1539	12	13.79	36.28	26.25	15.99	tr|H9KVF3|H9KVF3_RAT	Serine/threonine-protein kinase 24 (Fragment) OS=Rattus norvegicus GN=Stk24 PE=1 SV=1	RAT	8	0.92045	0.954993	0.912011	0.946237	0.0189858	0.933423
1540	12	13.5	32.51	27.54	21.34	sp|Q5M7A4|UBA5_RAT	Ubiquitin-like modifier-activating enzyme 5 OS=Rattus norvegicus GN=Uba5 PE=1 SV=1	RAT	7	0.972747	0.981748	0.92045	0.928966	0.0280055	0.950978
1541	12	12.93	31.49	21.95	14.31	sp|Q4V8F9|HSDL2_RAT	Hydroxysteroid dehydrogenase-like protein 2 OS=Rattus norvegicus GN=Hsdl2 PE=2 SV=1	RAT	8	1	1.02802	1.04713	1.07647	0.0268505	1.0379
1542	12	12.69	40.35	31.7	25.65	tr|D3ZIP8|D3ZIP8_RAT	Protein Endod1 OS=Rattus norvegicus GN=Endod1 PE=4 SV=2	RAT	10	1.00925	0.990832	0.990832	0.972747	0.0130253	0.990916
1543	12	12.1	43.97	30.62	28.66	tr|D4A520|D4A520_RAT	Protein Pptc7 OS=Rattus norvegicus GN=Pptc7 PE=1 SV=1	RAT	6	0.946237	0.990832	1	1.04713	0.0359652	0.996049
1544	12	12.06	45.45	36.36	27.73	tr|F1M9Y9|F1M9Y9_RAT	Protein Rbpms OS=Rattus norvegicus GN=Rbpms PE=1 SV=2	RAT	6	0.963829	1.02802	1.01859	1.07647	0.0391428	1.02173
1545	12	12.05	38.7	31.03	25.67	sp|P04961|PCNA_RAT	Proliferating cell nuclear antigen OS=Rattus norvegicus GN=Pcna PE=1 SV=1	RAT	6	1.1272	1.1695	1.05682	1.08643	0.0382757	1.10999
1546	12	12	36.39	28.2	26.23	sp|Q4V7A0|WDR61_RAT	WD repeat-containing protein 61 OS=Rattus norvegicus GN=Wdr61 PE=1 SV=1	RAT	7	1.01859	1.0666	1.00925	1.05682	0.0234781	1.03781
1547	11.99	23.7	64.07	49.3	44.29	tr|D4AE68|D4AE68_RAT	Guanine nucleotide binding protein, alpha q polypeptide, isoform CRA_a OS=Rattus norvegicus GN=Gnaq PE=1 SV=2	RAT	20	1	0.981748	0.954993	0.937562	0.0247966	0.968576
1548	11.95	12.09	52.47	45.68	38.89	tr|A0A096MKE2|A0A096MKE2_RAT	Protein Snx12 OS=Rattus norvegicus GN=Snx12 PE=1 SV=1	RAT	8	0.963829	0.990832	0.928966	0.946237	0.0238856	0.957466
1549	11.94	14.81	67.33	50.99	47.03	tr|D3ZUU6|D3ZUU6_RAT	Protein LOC100912012 OS=Rattus norvegicus GN=LOC100912012 PE=1 SV=1	RAT	14	1.13763	1.48594	0.990832	1.2942	0.149887	1.22715
1550	11.89	15.93	31.04	16.43	10.31	tr|M0RBF0|M0RBF0_RAT	Scaffold attachment factor B1 OS=Rattus norvegicus GN=Safb PE=1 SV=1	RAT	10	1	0.731139	1.23595	0.903649	0.18848	0.967684
1551	11.89	13.02	28.76	18.69	10.07	sp|A1L1L2|TM214_RAT	Transmembrane protein 214 OS=Rattus norvegicus GN=Tmem214 PE=2 SV=1	RAT	9	1.20226	1.10662	1.35519	1.25893	0.0732364	1.23075
1552	11.89	12.26	54.45	50.26	48.17	tr|G3V7W1|G3V7W1_RAT	Programmed cell death 6 (Predicted), isoform CRA_a OS=Rattus norvegicus GN=Pdcd6 PE=1 SV=1	RAT	9	1.01859	0.928966	1.00925	0.928966	0.0438584	0.971444
1553	11.88	14.59	48.33	39.72	26.94	tr|G3V617|G3V617_RAT	Mitogen-activated protein kinase OS=Rattus norvegicus GN=Mapk14 PE=1 SV=1	RAT	8	0.990832	0.972747	0.981748	0.963829	0.0102973	0.977289
1554	11.88	12.77	27.53	14.63	9.309	tr|F1LNV4|F1LNV4_RAT	ATP-binding cassette sub-family B member 7, mitochondrial OS=Rattus norvegicus GN=Abcb7 PE=1 SV=2	RAT	7	0.990832	0.972747	1.01859	1	0.0166038	0.995543
1555	11.86	11.95	37.11	24.65	20.11	tr|F1LND7|F1LND7_RAT	Farnesyl pyrophosphate synthase OS=Rattus norvegicus GN=Fdps PE=1 SV=3	RAT	6	0.21677	0.534564	0.296483	0.765597	0.47395	0.453354
1556	11.84	12.73	57.73	44.85	28.87	sp|P43278|H10_RAT	Histone H1.0 OS=Rattus norvegicus GN=H1f0 PE=2 SV=2	RAT	9	0.972747	1.01859	0.972747	1.01859	0.0230218	0.995669
1557	11.84	11.9	33.94	32.13	28.88	tr|F1LZJ4|F1LZJ4_RAT	Hydroxypyruvate isomerase OS=Rattus norvegicus GN=Hyi PE=1 SV=2	RAT	7	0.954993	1.04713	1.01859	1.11686	0.0561998	1.03439
1558	11.83	15.95	66.82	48.85	43.32	sp|P62907|RL10A_RAT	60S ribosomal protein L10a OS=Rattus norvegicus GN=Rpl10a PE=1 SV=2	RAT	11	1.03753	0.972747	0.870964	0.816582	0.0930774	0.924455
1559	11.83	13.49	26.04	13.96	8.125	tr|D3ZAS8|D3ZAS8_RAT	Protein Sart3 OS=Rattus norvegicus GN=Sart3 PE=1 SV=1	RAT	10	1.8197	0.895365	2.14783	1.10662	0.341997	1.49238
1560	11.82	12.92	23.23	10.16	5.078	tr|E9PST5|E9PST5_RAT	Protein Acin1 OS=Rattus norvegicus GN=Acin1 PE=1 SV=1	RAT	7	0.92045	0.928966	0.946237	0.954993	0.0145621	0.937661
1561	11.82	12.49	26.64	13.98	6.098	tr|D4AE49|D4AE49_RAT	Protein Skiv2l2 OS=Rattus norvegicus GN=Skiv2l2 PE=1 SV=3	RAT	7	0.972747	0.972747	0.963829	0.963829	0.00460512	0.968288
1562	11.81	13.39	40.62	32.13	26.48	tr|F7EUU4|F7EUU4_RAT	Protein Cops5 OS=Rattus norvegicus GN=Cops5 PE=1 SV=1	RAT	11	1	1.00925	0.954993	0.963829	0.0234781	0.982019
1563	11.79	13.19	19.56	9.458	7.254	tr|D3ZZA8|D3ZZA8_RAT	Protein Sec24a OS=Rattus norvegicus GN=Sec24a PE=1 SV=1	RAT	8	0.937562	1.03753	1.0666	1.18032	0.0819607	1.0555
1564	11.77	13.42	39.29	29.29	17.62	tr|F1MAC0|F1MAC0_RAT	Protein Ifi47 OS=Rattus norvegicus GN=Ifi47 PE=1 SV=1	RAT	11	0.937562	0.912011	1.05682	1.02802	0.0613764	0.983602
1565	11.77	12.59	69.49	60.17	56.78	sp|P62870|ELOB_RAT	Transcription elongation factor B polypeptide 2 OS=Rattus norvegicus GN=Tceb2 PE=1 SV=1	RAT	7	0.92045	0.963829	0.937562	0.972747	0.0219179	0.948647
1566	11.76	16.39	24.68	15.13	8.149	tr|D4A962|D4A962_RAT	Heterogeneous nuclear ribonucleoprotein U-like 1 (Predicted) OS=Rattus norvegicus GN=Hnrnpul1 PE=1 SV=1	RAT	8	0.972747	0.816582	0.981748	0.824138	0.0873979	0.898804
1567	11.76	14.25	66.93	61.42	42.52	tr|Q6MGC4|Q6MGC4_RAT	H2-K region expressed gene 2, rat orthologue OS=Rattus norvegicus GN=Pfdn6 PE=1 SV=1	RAT	7	0.912011	1.08643	0.765597	0.903649	0.124146	0.916921
1568	11.76	11.97	44.63	35.91	28.19	tr|G3V8I4|G3V8I4_RAT	Syntaxin 4A (Placental), isoform CRA_a OS=Rattus norvegicus GN=Stx4 PE=1 SV=1	RAT	7	1.13763	0.972747	1.10662	0.946237	0.0793476	1.04081
1569	11.75	12.47	41.25	26.88	25.62	sp|Q5RK09|EIF3G_RAT	Eukaryotic translation initiation factor 3 subunit G OS=Rattus norvegicus GN=Eif3g PE=1 SV=1	RAT	7	0.972747	0.887156	0.990832	0.895365	0.0489106	0.936525
1570	11.75	12.1	40.36	33.09	26.55	tr|D3ZCA0|D3ZCA0_RAT	Proline synthetase co-transcribed (Predicted) OS=Rattus norvegicus GN=Prosc PE=1 SV=1	RAT	7	0.946237	1.03753	0.887156	0.963829	0.0559639	0.958688
1571	11.75	12.05	24.37	15.22	9.84	tr|D3ZZ97|D3ZZ97_RAT	Tyrosine-protein kinase transmembrane receptor OS=Rattus norvegicus GN=Ror1 PE=1 SV=2	RAT	8	0.981748	0.937562	1.0666	1.01859	0.0474	1.00112
1572	11.74	14.52	20.63	10.29	4.064	tr|F1M801|F1M801_RAT	Anaphase promoting complex subunit 1 (Predicted) OS=Rattus norvegicus GN=Anapc1 PE=1 SV=2	RAT	9	0.963829	0.990832	0.990832	1.01859	0.0195378	0.991021
1573	11.73	18.63	80.09	60.65	54.17	tr|B0BNK1|B0BNK1_RAT	Protein Rab5c OS=Rattus norvegicus GN=Rab5c PE=1 SV=1	RAT	12	1.00925	1.0666	0.912011	0.963829	0.0576782	0.987922
1574	11.7	14.68	49.17	40.61	30.39	tr|Q6P688|Q6P688_RAT	S-adenosylmethionine synthase OS=Rattus norvegicus GN=Mat2a PE=1 SV=1	RAT	10	1.03753	1.01859	1.03753	1.01859	0.00921006	1.02806
1575	11.7	12.4	24.38	15.51	7.639	tr|A0A0H2UHX0|A0A0H2UHX0_RAT	Transient receptor potential cation channel subfamily M member 4 OS=Rattus norvegicus GN=Trpm4 PE=1 SV=1	RAT	12	1.00925	0.981748	1.01859	0.990832	0.0145621	1.00011
1576	11.7	11.83	29.1	18.07	15.86	tr|F1LQZ9|F1LQZ9_RAT	Microtubule-associated protein 6 OS=Rattus norvegicus GN=Map6 PE=1 SV=3	RAT	6	0.946237	0.972747	0.92045	0.937562	0.0200046	0.944249
1577	11.67	13.98	47.61	32.39	21.41	sp|Q561S0|NDUAA_RAT	NADH dehydrogenase [ubiquinone] 1 alpha subcomplex subunit 10, mitochondrial OS=Rattus norvegicus GN=Ndufa10 PE=1 SV=1	RAT	8	0.613762	0.772681	0.524807	0.648634	0.138964	0.639971
1578	11.67	11.77	48.15	32.72	29.94	tr|D3ZY47|D3ZY47_RAT	Protein RGD1559896 OS=Rattus norvegicus GN=RGD1559896 PE=1 SV=1	RAT	8	0.887156	0.92045	0.912011	0.946237	0.0230251	0.916463
1579	11.66	11.88	23.52	13.98	12.23	tr|G3V8D6|G3V8D6_RAT	Tripartite motif protein 3, isoform CRA_a OS=Rattus norvegicus GN=Trim3 PE=1 SV=1	RAT	9	0.981748	1	0.954993	0.963829	0.017729	0.975142
1580	11.64	13.09	24.39	18.85	16.41	tr|B2RZ74|B2RZ74_RAT	Protein Snrnp70 OS=Rattus norvegicus GN=Snrnp70 PE=1 SV=1	RAT	8	1.00925	1.00925	0.972747	0.972747	0.0184186	0.991
1581	11.64	11.99	42.06	31.76	21.47	tr|D4A0T8|D4A0T8_RAT	Protein Dhrs7 OS=Rattus norvegicus GN=Dhrs7 PE=1 SV=3	RAT	8	0.981748	1.04713	0.895365	0.946237	0.0570732	0.96762
1582	11.64	11.76	20.34	13.89	8.611	tr|D4A031|D4A031_RAT	DEAD (Asp-Glu-Ala-Asp) box polypeptide 42 (Predicted) OS=Rattus norvegicus GN=Ddx42 PE=1 SV=1	RAT	9	0.963829	0.954993	1.1695	1.18032	0.101075	1.06716
1583	11.63	11.78	37.08	29.17	24.17	sp|Q4KLJ8|PDCL3_RAT	Phosducin-like protein 3 OS=Rattus norvegicus GN=Pdcl3 PE=1 SV=1	RAT	7	1.1272	1.05682	1.01859	0.963829	0.0570732	1.04161
1584	11.62	14.39	45.81	35.46	23.79	sp|Q58FK9|KAT3_RAT	Kynurenine--oxoglutarate transaminase 3 OS=Rattus norvegicus GN=Ccbl2 PE=2 SV=1	RAT	10	0.954993	1.00925	0.972747	1.03753	0.0322212	0.99363
1585	11.62	13.99	37.32	24.64	18.18	tr|Q6IRG9|Q6IRG9_RAT	AP-3 complex subunit mu-1 OS=Rattus norvegicus GN=Ap3m1 PE=1 SV=1	RAT	9	0.972747	0.847227	0.879023	0.772681	0.0827061	0.867919
1586	11.6	14.79	54.21	45.12	33.33	sp|P97532|THTM_RAT	3-mercaptopyruvate sulfurtransferase OS=Rattus norvegicus GN=Mpst PE=1 SV=3	RAT	11	0.92045	0.887156	0.963829	0.928966	0.0294861	0.9251
1587	11.59	17.17	36.71	22.62	14.88	sp|Q6AYB5|SRP54_RAT	Signal recognition particle 54 kDa protein OS=Rattus norvegicus GN=Srp54 PE=2 SV=1	RAT	10	0.981748	1	1	1.01859	0.0130253	1.00008
1588	11.59	13.47	32.84	23.38	18.91	tr|F1LM16|F1LM16_RAT	Plasminogen activator inhibitor 1 OS=Rattus norvegicus GN=Serpine1 PE=3 SV=1	RAT	8	0.49204	1.90546	1.39316	4.28549	0.694864	2.01904
1589	11.58	19.6	41.93	31.39	27.8	tr|A0A0H2UI27|A0A0H2UI27_RAT	Septin-10 OS=Rattus norvegicus GN=Sept10 PE=1 SV=1	RAT	16	1	1.02802	0.928966	0.963829	0.0380744	0.980203
1590	11.58	15.8	26.65	14.88	10.61	tr|D3ZSB7|D3ZSB7_RAT	Ribosomal protein S6 kinase OS=Rattus norvegicus GN=Rps6ka4 PE=1 SV=2	RAT	13	1	1.01859	1.1272	1.14815	0.0605035	1.07349
1591	11.58	11.78	47.02	33.68	26.32	tr|Q9QX80|Q9QX80_RAT	CArG-binding factor A OS=Rattus norvegicus GN=Hnrnpab PE=1 SV=1	RAT	9	1.10662	0.862979	0.862979	0.672977	0.17561	0.876389
1592	11.56	12.05	44.49	28.76	26.07	tr|A0A0G2JTA0|A0A0G2JTA0_RAT	FAS-associated factor 2 OS=Rattus norvegicus GN=Faf2 PE=1 SV=1	RAT	8	0.972747	1.03753	0.895365	0.954993	0.0524984	0.965158
1593	11.55	13.15	37.44	25.8	20.24	sp|Q641Z2|PTN9_RAT	Tyrosine-protein phosphatase non-receptor type 9 OS=Rattus norvegicus GN=Ptpn9 PE=2 SV=1	RAT	13	1	1.05682	0.981748	1.03753	0.02912	1.01902
1594	11.54	11.78	29.8	20.63	19.48	sp|Q6AYC4|CAPG_RAT	Macrophage-capping protein OS=Rattus norvegicus GN=Capg PE=1 SV=1	RAT	8	1	1	1.03753	1.03753	0.0184186	1.01876
1595	11.53	11.69	55.17	51.72	33.5	tr|Q5M9F6|Q5M9F6_RAT	5-formyltetrahydrofolate cyclo-ligase OS=Rattus norvegicus GN=Mthfs PE=1 SV=1	RAT	7	0.524807	1.07647	0.636796	1.31826	0.36257	0.889081
1596	11.53	11.65	23.33	14.4	13.59	tr|G3V862|G3V862_RAT	Angiopoietin-like 2 OS=Rattus norvegicus GN=Angptl2 PE=4 SV=1	RAT	7	0.963829	1.01859	1	1.04713	0.030014	1.00739
1597	11.52	14.22	48.98	37.55	24.49	tr|Q6AY58|Q6AY58_RAT	B-cell receptor-associated protein 31 OS=Rattus norvegicus GN=Bcap31 PE=1 SV=1	RAT	11	1.02802	0.990832	0.963829	0.928966	0.0371221	0.977911
1598	11.5	14.68	41.58	30.94	18.81	tr|M0RA17|M0RA17_RAT	Sorting nexin-5 OS=Rattus norvegicus GN=Snx5 PE=1 SV=2	RAT	8	0.928966	1.00925	0.92045	0.990832	0.0398436	0.962375
1599	11.5	13.36	79.41	73.53	67.65	sp|P26772|CH10_RAT	10 kDa heat shock protein, mitochondrial OS=Rattus norvegicus GN=Hspe1 PE=1 SV=3	RAT	10	1.47231	1.47231	1.05682	1.05682	0.164284	1.26456
1600	11.49	14.19	25.23	13.47	7.763	sp|D3ZXD8|TM245_RAT	Transmembrane protein 245 OS=Rattus norvegicus GN=Tmem245 PE=1 SV=1	RAT	10	1	1	0.937562	0.937562	0.032225	0.968781
1601	11.49	11.74	36.76	28.11	22.43	tr|F1M9C0|F1M9C0_RAT	Protein Mapkapk2 OS=Rattus norvegicus GN=Mapkapk2 PE=1 SV=3	RAT	10	1.04713	1.05682	0.972747	0.972747	0.0392753	1.01236
1602	11.48	18.13	22.93	10.24	5.047	tr|F1LSK5|F1LSK5_RAT	Protein Heatr5a OS=Rattus norvegicus GN=Heatr5a PE=1 SV=1	RAT	14	0.928966	0.895365	1.00925	0.972747	0.0453396	0.951583
1603	11.48	15.17	39.29	24.43	21.16	sp|P63036|DNJA1_RAT	DnaJ homolog subfamily A member 1 OS=Rattus norvegicus GN=Dnaja1 PE=1 SV=1	RAT	12	1.01859	1.01859	0.963829	0.963829	0.027624	0.99121
1604	11.48	11.76	57.35	46.57	39.71	tr|B0BN81|B0BN81_RAT	40S ribosomal protein S5 OS=Rattus norvegicus GN=Rps5 PE=1 SV=1	RAT	9	0.954993	0.990832	0.972747	1.01859	0.0238856	0.984291
1605	11.45	16.32	36.02	26.63	18.2	sp|Q4KLH4|PSPC1_RAT	Paraspeckle component 1 OS=Rattus norvegicus GN=Pspc1 PE=1 SV=1	RAT	9	1.1272	0.855067	1.1272	0.847227	0.139564	0.989172
1606	11.45	13.02	39.66	32.29	23.51	tr|F1LMQ3|F1LMQ3_RAT	Protein Psmd8 OS=Rattus norvegicus GN=Psmd8 PE=1 SV=1	RAT	9	1.00925	1.03753	0.990832	1.01859	0.0166038	1.01405
1607	11.43	11.56	37.03	28.11	21.35	tr|M0RD26|M0RD26_RAT	Protein PCOLCE2 OS=Rattus norvegicus GN=PCOLCE2 PE=4 SV=2	RAT	6	0.954993	0.981748	0.972747	1	0.0166038	0.977372
1608	11.42	12.71	39.3	28.77	16.84	tr|I6L9G6|I6L9G6_RAT	Protein Tardbp OS=Rattus norvegicus GN=Tardbp PE=1 SV=1	RAT	7	1.09648	0.679204	0.887156	0.549541	0.258791	0.803095
1609	11.41	11.46	66.28	63.95	54.65	tr|D3ZD09|D3ZD09_RAT	Cytochrome c oxidase subunit 6B1 OS=Rattus norvegicus GN=Cox6b1 PE=1 SV=1	RAT	10	0.990832	1.01859	0.981748	1.01859	0.0164269	1.00244
1610	11.4	14.51	62.02	56.25	39.9	tr|A0A0H2UHP9|A0A0H2UHP9_RAT	RCG39700, isoform CRA_d OS=Rattus norvegicus GN=Rab6a PE=1 SV=1	RAT	8	0.963829	1.02802	0.972747	1.03753	0.0325528	1.00053
1611	11.38	23.24	77.06	72.48	50.92	sp|P04905|GSTM1_RAT	Glutathione S-transferase Mu 1 OS=Rattus norvegicus GN=Gstm1 PE=1 SV=2	RAT	21	1.01859	0.981748	1	0.963829	0.0205937	0.991042
1612	11.38	11.52	50.83	44.58	33.75	tr|B6DYQ8|B6DYQ8_RAT	Glutathione S-transferase theta 1 OS=Rattus norvegicus GN=Gstt1 PE=1 SV=1	RAT	9	0.990832	0.963829	1	0.972747	0.0145621	0.981852
1613	11.37	22.28	58.94	41.64	37.54	tr|A0A0G2KAE1|A0A0G2KAE1_RAT	Protein Lims2 OS=Rattus norvegicus GN=Lims2 PE=1 SV=1	RAT	19	1.02802	0.717794	2.72898	1.64437	0.502349	1.52979
1614	11.37	12.52	32.19	22.22	17.66	tr|Q5M7T6|Q5M7T6_RAT	ATPase, H+ transporting, lysosomal 38kDa, V0 subunit d1 OS=Rattus norvegicus GN=Atp6v0d1 PE=1 SV=1	RAT	7	0.879023	0.801678	1.02802	0.954993	0.0921656	0.915927
1615	11.35	13.61	22.9	13	6.061	tr|R9PXV2|R9PXV2_RAT	Ral GTPase-activating protein subunit beta OS=Rattus norvegicus GN=Ralgapb PE=1 SV=2	RAT	11	1.01859	0.809096	1.44544	1.1695	0.208721	1.11066
1616	11.31	11.82	26.15	16.79	14.5	tr|Q5BJP4|Q5BJP4_RAT	Protein LOC100910882 OS=Rattus norvegicus GN=Rbm39 PE=1 SV=1	RAT	6	0.946237	0.887156	0.963829	0.895365	0.035332	0.923147
1617	11.29	14.43	26.57	19.65	10.95	sp|Q6AYJ1|RECQ1_RAT	ATP-dependent DNA helicase Q1 OS=Rattus norvegicus GN=Recql PE=1 SV=1	RAT	8	0.990832	0.954993	1.03753	0.990832	0.0294971	0.993546
1618	11.29	12.37	48.07	42.54	39.23	sp|Q62785|HAP28_RAT	28 kDa heat- and acid-stable phosphoprotein OS=Rattus norvegicus GN=Pdap1 PE=1 SV=1	RAT	9	1.01859	0.912011	1.02802	0.928966	0.0533628	0.971896
1619	11.29	11.54	24.7	13.23	7.216	tr|D4A2D7|D4A2D7_RAT	Importin 4 (Predicted), isoform CRA_b OS=Rattus norvegicus GN=Ipo4 PE=1 SV=2	RAT	10	0.529663	0.77983	1.14815	1.75388	0.437513	1.05288
1620	11.28	11.41	56.58	42.76	38.16	sp|Q9EQX9|UBE2N_RAT	Ubiquitin-conjugating enzyme E2 N OS=Rattus norvegicus GN=Ube2n PE=1 SV=1	RAT	9	0.963829	1.00925	1	1.03753	0.0262656	1.00265
1621	11.26	11.64	21.45	11.77	7.692	tr|F1M6X7|F1M6X7_RAT	Rho GTPase-activating protein 17 OS=Rattus norvegicus GN=Arhgap17 PE=1 SV=3	RAT	8	0.954993	1.01859	0.954993	1.01859	0.032225	0.986792
1622	11.26	11.33	37.43	29.43	29.43	tr|E9PTW1|E9PTW1_RAT	Protein Clk2 OS=Rattus norvegicus GN=Scamp3 PE=1 SV=2	RAT	7	1.01859	0.981748	1.01859	0.981748	0.0184186	1.00017
1623	11.26	11.31	40.78	37.94	34.04	sp|B0BNM1|NNRE_RAT	NAD(P)H-hydrate epimerase OS=Rattus norvegicus GN=Apoa1bp PE=2 SV=1	RAT	8	0.954993	0.912011	0.981748	0.937562	0.0268505	0.946578
1624	11.25	12.38	35.48	32.26	25.09	tr|D4A249|D4A249_RAT	Protein Mblac2 OS=Rattus norvegicus GN=Mblac2 PE=1 SV=1	RAT	7	1	1.00925	0.990832	1	0.00651268	1.00002
1625	11.25	11.4	21.97	14.29	10.11	sp|Q5XI67|FBX30_RAT	F-box only protein 30 OS=Rattus norvegicus GN=Fbxo30 PE=1 SV=1	RAT	7	0.887156	0.870964	0.928966	0.912011	0.0247966	0.899774
1626	11.24	11.93	36.72	30.45	21.49	tr|B0BN46|B0BN46_RAT	Grhpr protein OS=Rattus norvegicus GN=Grhpr PE=1 SV=1	RAT	9	1	1.01859	1.01859	1.03753	0.0130253	1.01868
1627	11.24	11.71	26.54	21.8	16.82	sp|Q9EQV9|CBPB2_RAT	Carboxypeptidase B2 OS=Rattus norvegicus GN=Cpb2 PE=2 SV=1	RAT	11	0.972747	0.847227	0.981748	0.847227	0.0713498	0.912237
1628	11.24	11.41	30.35	25.25	14.46	sp|O54748|STK3_RAT	Serine/threonine-protein kinase 3 OS=Rattus norvegicus GN=Stk3 PE=1 SV=1	RAT	8	0.679204	0.559758	0.83946	0.685488	0.143696	0.690977
1629	11.22	14.26	78.81	56.95	51.66	tr|A0A0H2UHT6|A0A0H2UHT6_RAT	40S ribosomal protein S18 OS=Rattus norvegicus GN=Rps18 PE=1 SV=1	RAT	12	1.28233	1.1272	1.31826	1.15878	0.0658546	1.22164
1630	11.21	13.41	70.43	56.03	29.96	sp|P62919|RL8_RAT	60S ribosomal protein L8 OS=Rattus norvegicus GN=Rpl8 PE=2 SV=2	RAT	9	0.963829	0.981748	0.990832	1.00925	0.0166038	0.986415
1631	11.2	11.27	49.55	33.93	27.23	tr|G3V6L9|G3V6L9_RAT	Peptidyl-prolyl cis-trans isomerase OS=Rattus norvegicus GN=Fkbp3 PE=1 SV=1	RAT	6	0.954993	0.855067	0.990832	0.887156	0.0582062	0.922012
1632	11.2	11.25	67.41	55.56	50.37	tr|D4AAE9|D4AAE9_RAT	Protein Cisd2 OS=Rattus norvegicus GN=Cisd2 PE=1 SV=1	RAT	8	0.963829	0.954993	0.946237	0.937562	0.0102973	0.950655
1633	11.17	11.65	28.67	17.04	11.49	sp|Q8R500|MFN2_RAT	Mitofusin-2 OS=Rattus norvegicus GN=Mfn2 PE=1 SV=1	RAT	7	1.0666	1.05682	1.00925	1.00925	0.0255474	1.03548
1634	11.17	11.3	61.42	58.27	51.18	tr|M0RCX0|M0RCX0_RAT	Protein Pcbd2 OS=Rattus norvegicus GN=Pcbd2 PE=1 SV=1	RAT	8	0.990832	0.937562	0.954993	0.903649	0.0332053	0.946759
1635	11.13	15.5	35.71	21.1	11.26	tr|F1LMB9|F1LMB9_RAT	Exocyst complex component 2 OS=Rattus norvegicus GN=Exoc2 PE=1 SV=1	RAT	12	1	1.01859	0.981748	0.990832	0.0136623	0.997793
1636	11.12	14.22	29.83	18.37	10.2	tr|D4A0E8|D4A0E8_RAT	Protein arginine N-methyltransferase 5 OS=Rattus norvegicus GN=Prmt5 PE=1 SV=1	RAT	7	1.00925	0.954993	0.972747	0.92045	0.0332053	0.964361
1637	11.12	11.29	59.57	48.94	37.23	tr|A0A0G2JXD0|A0A0G2JXD0_RAT	RCG63708 OS=Rattus norvegicus GN=rCG_63708 PE=4 SV=1	RAT	7	1.02802	0.990832	1.02802	0.990832	0.0184186	1.00942
1638	11.12	11.25	28.72	19.29	12.79	tr|F1LNV5|F1LNV5_RAT	Protein LOC100362065 OS=Rattus norvegicus GN=Micu1 PE=1 SV=2	RAT	7	1.01859	1.02802	0.972747	0.990832	0.0219179	1.00255
1639	11.11	35.18	86.05	86.05	83.72	sp|P13832|MRLCA_RAT	Myosin regulatory light chain RLC-A OS=Rattus norvegicus GN=Rlc-a PE=2 SV=2	RAT	61	0.731139	0.758578	0.772681	0.801678	0.0332053	0.766019
1640	11.1	17.75	37.37	20.2	14.48	sp|P61765|STXB1_RAT	Syntaxin-binding protein 1 OS=Rattus norvegicus GN=Stxbp1 PE=1 SV=1	RAT	11	0.990832	1.02802	0.990832	1.02802	0.0184186	1.00942
1641	11.09	13.47	34.67	23.18	19.89	tr|F1LM37|F1LM37_RAT	Protein Sf1 OS=Rattus norvegicus GN=Sf1 PE=1 SV=2	RAT	8	1	0.972747	1.01859	0.990832	0.0166038	0.995543
1642	11.07	11.98	40.85	34.48	22.02	sp|Q5BK63|NDUA9_RAT	NADH dehydrogenase [ubiquinone] 1 alpha subcomplex subunit 9, mitochondrial OS=Rattus norvegicus GN=Ndufa9 PE=1 SV=2	RAT	10	0.954993	0.990832	0.946237	0.981748	0.0189858	0.968452
1643	11.07	11.11	48.66	40.18	35.71	sp|Q5U2R7|MESD_RAT	LDLR chaperone MESD OS=Rattus norvegicus GN=Mesdc2 PE=2 SV=1	RAT	8	1	1	1.00925	1.00925	0.00460515	1.00463
1644	11.06	11.38	23.55	15.25	13.71	tr|Q5PQK2|Q5PQK2_RAT	Fusion, derived from t(1216) malignant liposarcoma (Human) OS=Rattus norvegicus GN=Fus PE=1 SV=1	RAT	7	0.990832	0.642688	1.10662	0.717794	0.220473	0.864484
1645	11.06	11.22	29.85	20.92	15.56	tr|A0A0G2JSS1|A0A0G2JSS1_RAT	Integrin-linked kinase-associated serine/threonine phosphatase 2C OS=Rattus norvegicus GN=Ilkap PE=1 SV=1	RAT	7	1.02802	1.04713	1	1.01859	0.0166038	1.02343
1646	11.05	24.73	65	62.94	45	sp|P54313|GBB2_RAT	Guanine nucleotide-binding protein G(I)/G(S)/G(T) subunit beta-2 OS=Rattus norvegicus GN=Gnb2 PE=1 SV=4	RAT	20	1.11686	0.981748	0.946237	0.83946	0.102083	0.971077
1647	11.05	12.9	42.23	35.47	29.39	tr|D3ZIL6|D3ZIL6_RAT	Enoyl Coenzyme A hydratase domain containing 2 (Predicted), isoform CRA_a OS=Rattus norvegicus GN=Echdc2 PE=1 SV=1	RAT	7	0.928966	1.14815	0.912011	1.1272	0.10593	1.02908
1648	11.05	11.28	34	24.8	24.8	tr|M0RCH5|M0RCH5_RAT	Glucosamine-6-phosphate isomerase OS=Rattus norvegicus GN=Gnpda1 PE=1 SV=2	RAT	7	0.92045	0.981748	1.1272	1.20226	0.106036	1.05791
1649	11.04	16.44	30.95	21.62	14.86	tr|D3Z8E0|D3Z8E0_RAT	Ribosomal protein S6 kinase OS=Rattus norvegicus GN=Rps6ka3 PE=1 SV=2	RAT	18	1.01859	1.02802	0.954993	0.963829	0.0325528	0.991357
1650	11.03	11.42	26.33	17.97	12.99	sp|Q62894|ECM1_RAT	Extracellular matrix protein 1 OS=Rattus norvegicus GN=Ecm1 PE=1 SV=2	RAT	8	0.619441	0.77983	0.724436	0.92045	0.142667	0.761039
1651	11.01	13.55	31.15	21.09	11.45	tr|A0A0G2K5C8|A0A0G2K5C8_RAT	Stromal interaction molecule 1 OS=Rattus norvegicus GN=Stim1 PE=1 SV=1	RAT	8	1.28233	1.15878	1.10662	1.00925	0.0864697	1.13925
1652	11.01	13.37	33.4	21.06	19.36	tr|D4AEK9|D4AEK9_RAT	Protein Ccdc6 OS=Rattus norvegicus GN=Ccdc6 PE=1 SV=3	RAT	9	1	1.00925	1.0666	1.07647	0.0325528	1.03808
1653	11.01	12.92	34.82	20.45	12.3	tr|A0A0H2UI21|A0A0H2UI21_RAT	Carnitine O-acetyltransferase OS=Rattus norvegicus GN=Crat PE=1 SV=1	RAT	10	1.01859	1.01859	1.03753	1.02802	0.0076511	1.02568
1654	11	21.18	22.98	15.04	10.37	tr|F1LZ43|F1LZ43_RAT	Protein Dip2a OS=Rattus norvegicus GN=Dip2a PE=1 SV=3	RAT	17	0.981748	1.00925	0.963829	0.981748	0.0164992	0.984144
1655	11	11.61	37.7	19.11	14.92	sp|Q5FVI6|VATC1_RAT	V-type proton ATPase subunit C 1 OS=Rattus norvegicus GN=Atp6v1c1 PE=2 SV=1	RAT	8	1.03753	1.20226	0.963829	1.10662	0.0816094	1.07756
1656	10.99	14.26	24.61	15.98	8.376	sp|Q9JJ50|HGS_RAT	Hepatocyte growth factor-regulated tyrosine kinase substrate OS=Rattus norvegicus GN=Hgs PE=1 SV=1	RAT	8	0.972747	1.01859	0.946237	0.990832	0.0268505	0.982102
1657	10.99	12.58	32.03	17.81	12.58	tr|Q6GMN6|Q6GMN6_RAT	Carnitine O-octanoyltransferase OS=Rattus norvegicus GN=Crot PE=1 SV=1	RAT	9	0.847227	0.816582	0.937562	0.912011	0.0552584	0.878346
1658	10.98	13.06	24.9	17.55	15.71	tr|F1M675|F1M675_RAT	F-box/WD repeat-containing protein 8 OS=Rattus norvegicus GN=Fbxw8 PE=1 SV=2	RAT	8	1	1.00925	1.07647	1.07647	0.0346626	1.04055
1659	10.98	11.17	50.17	45.87	36.3	tr|A0A0G2K459|A0A0G2K459_RAT	Protein Mtch2 OS=Rattus norvegicus GN=Mtch2 PE=1 SV=1	RAT	10	0.963829	0.981748	0.963829	0.981748	0.00921006	0.972788
1660	10.97	11.55	35.14	31.27	20.67	tr|A0A0H2UHZ2|A0A0H2UHZ2_RAT	Nucleosome assembly protein 1-like 4 OS=Rattus norvegicus GN=Nap1l4 PE=1 SV=1	RAT	7	1.08643	0.990832	1.03753	0.946237	0.0514674	1.01526
1661	10.97	11.06	56.97	41.21	36.36	sp|P63326|RS10_RAT	40S ribosomal protein S10 OS=Rattus norvegicus GN=Rps10 PE=2 SV=1	RAT	7	0.963829	0.981748	0.990832	1	0.0135817	0.984102
1662	10.96	15.44	33.26	24.43	19.68	tr|A0A0G2KB26|A0A0G2KB26_RAT	Limitrin, isoform CRA_b OS=Rattus norvegicus GN=Mxra8 PE=4 SV=1	RAT	12	0.937562	0.954993	1.01859	1.04713	0.0453497	0.989569
1663	10.96	13.52	32.8	22.19	17.68	tr|E9PTI6|E9PTI6_RAT	Protein Raly OS=Rattus norvegicus GN=Raly PE=1 SV=2	RAT	7	1.25893	0.772681	1.1272	0.704693	0.241392	0.965874
1664	10.96	11.04	34.24	17.87	11.66	tr|A0A096MK61|A0A096MK61_RAT	Protein Crtap OS=Rattus norvegicus GN=LOC102555086 PE=1 SV=1	RAT	5	0.954993	0.870964	1.03753	0.937562	0.0624513	0.950262
1665	10.94	11.07	29.61	23.12	14.29	sp|Q5XIP1|PELO_RAT	Protein pelota homolog OS=Rattus norvegicus GN=Pelo PE=1 SV=1	RAT	6	0.963829	1.01859	0.963829	1.01859	0.027624	0.99121
1666	10.93	11.98	44.44	31.17	19.75	tr|B2GUZ9|B2GUZ9_RAT	Fam49b protein OS=Rattus norvegicus GN=Fam49b PE=1 SV=1	RAT	7	0.879023	0.794328	0.912011	0.831764	0.0525008	0.854281
1667	10.92	20.12	66.67	63.18	61.19	sp|Q5U316|RAB35_RAT	Ras-related protein Rab-35 OS=Rattus norvegicus GN=Rab35 PE=1 SV=1	RAT	14	0.879023	0.903649	0.744732	0.772681	0.0819494	0.825021
1668	10.92	13.29	34.97	18.4	15.95	sp|Q03346|MPPB_RAT	Mitochondrial-processing peptidase subunit beta OS=Rattus norvegicus GN=Pmpcb PE=1 SV=3	RAT	8	1.03753	1.10662	0.981748	1.04713	0.0424539	1.04326
1669	10.92	13.18	53.4	47.64	47.64	sp|Q8CFN2|CDC42_RAT	Cell division control protein 42 homolog OS=Rattus norvegicus GN=Cdc42 PE=1 SV=2	RAT	8	0.963829	0.981748	0.972747	0.990832	0.0102973	0.977289
1670	10.92	11.45	22.6	14.03	10.78	sp|Q9Z272|GIT1_RAT	ARF GTPase-activating protein GIT1 OS=Rattus norvegicus GN=Git1 PE=1 SV=1	RAT	11	0.972747	0.990832	1.01859	1.02802	0.0219179	1.00255
1671	10.9	11.15	52.71	33.72	29.07	sp|Q5RK19|SNF8_RAT	Vacuolar-sorting protein SNF8 OS=Rattus norvegicus GN=Snf8 PE=1 SV=1	RAT	7	1.04713	1.1272	1.00925	1.08643	0.0411797	1.0675
1672	10.89	13.11	17.15	11.53	7.123	tr|G3V6I1|G3V6I1_RAT	Lethal(2) giant larvae protein homolog 1 OS=Rattus norvegicus GN=Llgl1 PE=1 SV=2	RAT	7	0.963829	0.990832	0.972747	1	0.0145621	0.981852
1673	10.88	13.74	34.81	19.56	11.37	tr|A0A0G2K2V5|A0A0G2K2V5_RAT	Protein Exoc1 OS=Rattus norvegicus GN=Exoc1 PE=1 SV=1	RAT	10	0.887156	0.912011	1.01859	1.04713	0.0703443	0.966222
1674	10.88	12.98	40.93	23.49	9.001	tr|F1LR42|F1LR42_RAT	Protein Rufy1 OS=Rattus norvegicus GN=Rufy1 PE=1 SV=1	RAT	6	0.972747	0.963829	1.02802	1.00925	0.0263955	0.993461
1675	10.87	14.75	37.5	22.28	12.66	tr|A2VD14|A2VD14_RAT	Abcf2 protein OS=Rattus norvegicus GN=Abcf2 PE=1 SV=1	RAT	8	0.963829	0.990832	1	1.02802	0.0230251	0.995669
1676	10.87	11.04	58.79	54.95	50.55	sp|P37996|ARL3_RAT	ADP-ribosylation factor-like protein 3 OS=Rattus norvegicus GN=Arl3 PE=1 SV=2	RAT	9	0.954993	0.954993	0.972747	0.963829	0.00765111	0.96164
1677	10.86	19.87	43.41	27.6	19.69	tr|A0A0G2K014|A0A0G2K014_RAT	Protein Lcp1 OS=Rattus norvegicus GN=Lcp1 PE=1 SV=1	RAT	14	1.31826	1.05682	1.67494	1.33045	0.163232	1.34512
1678	10.86	10.99	43.5	30.94	27.35	sp|Q9WUS0|KAD4_RAT	Adenylate kinase 4, mitochondrial OS=Rattus norvegicus GN=Ak4 PE=2 SV=1	RAT	6	0.928966	1.0666	0.946237	1.08643	0.069583	1.00706
1679	10.85	15.83	40.21	33.45	28.47	sp|Q5XIT1|MARE3_RAT	Microtubule-associated protein RP/EB family member 3 OS=Rattus norvegicus GN=Mapre3 PE=1 SV=1	RAT	10	0.963829	0.937562	1.00925	0.981748	0.0268505	0.973098
1680	10.85	10.94	59.26	57.78	47.41	sp|P02696|RET1_RAT	Retinol-binding protein 1 OS=Rattus norvegicus GN=Rbp1 PE=1 SV=2	RAT	7	1.11686	1.07647	1.07647	1.03753	0.02605	1.07683
1681	10.84	13.12	26.77	17.08	8.374	tr|D3ZUD8|D3ZUD8_RAT	Protein Tm9sf3 OS=Rattus norvegicus GN=Tm9sf3 PE=1 SV=2	RAT	6	0.954993	0.990832	0.937562	0.972747	0.0205937	0.964033
1682	10.82	11.94	43.06	34.72	22.92	tr|G3V9N1|G3V9N1_RAT	RCG21137 OS=Rattus norvegicus GN=Pgam5 PE=1 SV=1	RAT	8	0.855067	1.11686	0.809096	1.0666	0.137268	0.961906
1683	10.82	10.96	31.98	23.63	22.43	sp|P25093|FAAA_RAT	Fumarylacetoacetase OS=Rattus norvegicus GN=Fah PE=1 SV=1	RAT	7	1.05682	1.03753	1.09648	1.0666	0.0200046	1.06436
1684	10.81	11.02	34.88	22.93	17.8	tr|F1LRE1|F1LRE1_RAT	Glutathione reductase OS=Rattus norvegicus GN=Gsr PE=1 SV=2	RAT	7	1.02802	0.972747	1.08643	1.02802	0.0390737	1.0288
1685	10.78	15.22	23.08	15.07	8.212	tr|A0A0G2JUG7|A0A0G2JUG7_RAT	Protein Iqsec1 OS=Rattus norvegicus GN=Iqsec1 PE=1 SV=1	RAT	9	0.972747	0.990832	1	1.00925	0.0135817	0.993208
1686	10.78	10.87	51.15	42.31	40.77	tr|Q6PCU4|Q6PCU4_RAT	Emd protein OS=Rattus norvegicus GN=Emd PE=1 SV=1	RAT	10	0.937562	0.92045	0.895365	0.879023	0.0247966	0.9081
1687	10.76	10.96	49.81	47.13	34.87	sp|O70257|STX7_RAT	Syntaxin-7 OS=Rattus norvegicus GN=Stx7 PE=1 SV=4	RAT	7	0.954993	1.10662	0.887156	1.02802	0.0822979	0.994197
1688	10.75	14.22	28.52	16.94	9.071	tr|A0A0G2K4U6|A0A0G2K4U6_RAT	Interleukin enhancer-binding factor 3 OS=Rattus norvegicus GN=Ilf3 PE=1 SV=1	RAT	8	1.02802	0.972747	0.981748	0.928966	0.0359652	0.977869
1689	10.75	12.93	45.4	30.08	22.28	tr|Q6IMZ5|Q6IMZ5_RAT	Tropomodulin 1 OS=Rattus norvegicus GN=Tmod1 PE=1 SV=1	RAT	10	0.990832	0.92045	1.05682	0.972747	0.0494876	0.985212
1690	10.75	11.96	40.77	28.78	17.99	tr|Q4V797|Q4V797_RAT	Interferon-gamma-inducible GTPase Ifgga1 protein OS=Rattus norvegicus GN=RGD1309362 PE=1 SV=1	RAT	7	0.879023	0.870964	0.809096	0.794328	0.0442775	0.838353
1691	10.75	11.55	23.78	12.87	7.073	tr|D3ZQC6|D3ZQC6_RAT	Protein Ubr1 OS=Rattus norvegicus GN=Ubr1 PE=1 SV=3	RAT	12	0.954993	0.92045	0.954993	0.912011	0.020959	0.935611
1692	10.74	11.09	74.76	69.9	60.19	sp|Q6PDU7|ATP5L_RAT	ATP synthase subunit g, mitochondrial OS=Rattus norvegicus GN=Atp5l PE=1 SV=2	RAT	12	0.903649	1.04713	0.862979	0.990832	0.0758459	0.951147
1693	10.73	13.68	23.08	12.86	7.376	tr|A0A0G2K327|A0A0G2K327_RAT	Oxysterol-binding protein OS=Rattus norvegicus GN=Osbpl1a PE=1 SV=1	RAT	8	0.855067	0.937562	0.801678	0.879023	0.0561998	0.868332
1694	10.73	11.21	74	62	55.33	tr|G3V7K6|G3V7K6_RAT	Single-stranded DNA-binding protein, mitochondrial OS=Rattus norvegicus GN=Ssbp1 PE=1 SV=2	RAT	10	0.981748	1.01859	0.946237	0.972747	0.0264407	0.979831
1695	10.72	11.57	24.2	14.9	10.9	tr|D4ACN6|D4ACN6_RAT	Procollagen, type IV, alpha 3 (Goodpasture antigen) binding protein (Predicted), isoform CRA_a OS=Rattus norvegicus GN=Col4a3bp PE=1 SV=2	RAT	9	1.0666	1.07647	1.03753	1.04713	0.0145621	1.05693
1696	10.72	10.85	24.35	16.79	11.44	tr|A0A0H2UHT5|A0A0H2UHT5_RAT	Protein phosphatase 1G OS=Rattus norvegicus GN=Ppm1g PE=1 SV=1	RAT	6	1.00925	1.03753	0.937562	0.963829	0.039334	0.987043
1697	10.7	13.18	41.91	37.87	34.93	tr|M0RAD5|M0RAD5_RAT	ATP-dependent Clp protease proteolytic subunit OS=Rattus norvegicus GN=Clpp PE=1 SV=1	RAT	10	1.05682	1.04713	1.01859	1	0.0219179	1.03063
1698	10.7	12.04	42.17	34.82	25.24	tr|G3V7J2|G3V7J2_RAT	Interferon-inducible double-stranded RNA-dependent protein kinase activator A OS=Rattus norvegicus GN=Prkra PE=1 SV=1	RAT	8	1.02802	0.946237	1.04713	0.963829	0.0424361	0.996303
1699	10.68	11.47	54.5	41.89	30.63	sp|P07895|SODM_RAT	Superoxide dismutase [Mn], mitochondrial OS=Rattus norvegicus GN=Sod2 PE=1 SV=2	RAT	8	1.88799	1.5417	1.1695	0.928966	0.263861	1.38204
1700	10.67	13.74	24.93	18.09	11.82	sp|A1L1J9|LMF2_RAT	Lipase maturation factor 2 OS=Rattus norvegicus GN=Lmf2 PE=2 SV=1	RAT	8	0.937562	1.02802	0.937562	1.02802	0.0460192	0.982789
1701	10.66	13.39	28.29	22.95	13.35	tr|A0A0H2UHD9|A0A0H2UHD9_RAT	Nicalin OS=Rattus norvegicus GN=Ncln PE=1 SV=1	RAT	9	0.946237	0.954993	0.946237	0.954993	0.00460515	0.950615
1702	10.66	10.95	41.13	30.5	16.31	sp|Q68FW9|CSN3_RAT	COP9 signalosome complex subunit 3 OS=Rattus norvegicus GN=Cops3 PE=1 SV=1	RAT	7	1	1.03753	0.981748	1.00925	0.0200046	1.00713
1703	10.64	12.22	29.76	12.99	7.692	sp|Q498R3|DJC10_RAT	DnaJ homolog subfamily C member 10 OS=Rattus norvegicus GN=Dnajc10 PE=2 SV=2	RAT	9	1.04713	1.09648	1.52757	1.43219	0.162669	1.27584
1704	10.62	10.9	37.43	25.45	18.56	tr|D3ZUY0|D3ZUY0_RAT	Protein Rdh14 OS=Rattus norvegicus GN=Rdh14 PE=1 SV=1	RAT	7	0.954993	0.990832	1	1.03753	0.029486	0.995838
1705	10.6	10.88	52.45	41.26	32.87	sp|P62268|RS23_RAT	40S ribosomal protein S23 OS=Rattus norvegicus GN=Rps23 PE=1 SV=3	RAT	7	0.954993	0.963829	0.954993	0.963829	0.00460514	0.959411
1706	10.59	11	76.58	49.55	39.64	tr|B2RYS2|B2RYS2_RAT	Cytochrome b-c1 complex subunit 7 OS=Rattus norvegicus GN=Uqcrb PE=1 SV=1	RAT	10	0.794328	0.772681	0.879023	0.847227	0.0510971	0.823315
1707	10.58	11.93	23.86	13.88	8.894	tr|F1LM55|F1LM55_RAT	Protein Ccar2 OS=Rattus norvegicus GN=Ccar2 PE=1 SV=1	RAT	10	1.20226	0.704693	1.57036	0.895365	0.299807	1.09317
1708	10.58	11.4	26.03	14.56	6.192	tr|D4AE06|D4AE06_RAT	Peptidyl-prolyl cis-trans isomerase OS=Rattus norvegicus GN=Fkbp15 PE=1 SV=3	RAT	7	1.0666	0.963829	1.10662	1	0.0538688	1.03426
1709	10.58	11.31	14.12	8.416	5.882	tr|E9PTR4|E9PTR4_RAT	Protein Ubap2l OS=Rattus norvegicus GN=Ubap2l PE=1 SV=2	RAT	7	0.903649	0.855067	0.963829	0.903649	0.0425376	0.906549
1710	10.57	11.44	27.49	21.73	18.32	tr|F7EVX2|F7EVX2_RAT	Translation initiation factor eIF-2B subunit beta OS=Rattus norvegicus GN=Eif2b2 PE=1 SV=1	RAT	6	0.963829	0.895365	1.03753	0.963829	0.0520956	0.965138
1711	10.57	10.89	24.04	12.16	7.65	tr|G3V817|G3V817_RAT	X-ray repair cross-complementing protein 5 OS=Rattus norvegicus GN=Xrcc5 PE=1 SV=1	RAT	7	1.02802	0.954993	1.1272	1.05682	0.0592584	1.04176
1712	10.55	12.72	44.69	31.84	21.23	tr|Q6P9X2|Q6P9X2_RAT	Signal peptidase complex catalytic subunit SEC11 OS=Rattus norvegicus GN=Sec11a PE=1 SV=1	RAT	7	0.972747	0.946237	0.990832	0.963829	0.0166038	0.968411
1713	10.54	12.87	40.52	28.62	21.56	tr|G3V709|G3V709_RAT	Nicotinate phosphoribosyltransferase domain containing 1, isoform CRA_c OS=Rattus norvegicus GN=Naprt PE=1 SV=1	RAT	11	0.92045	1.08643	0.903649	1.0666	0.0832185	0.99428
1714	10.53	11.21	26.15	13.51	6.609	tr|A0A0G2K104|A0A0G2K104_RAT	Calcium-activated potassium channel subunit alpha-1 OS=Rattus norvegicus GN=Kcnma1 PE=1 SV=1	RAT	7	0.928966	0.847227	0.946237	0.862979	0.0469337	0.896352
1715	10.51	12.16	27.65	12.16	5.033	tr|D3ZEY0|D3ZEY0_RAT	Protein Ccdc141 OS=Rattus norvegicus GN=Ccdc141 PE=1 SV=2	RAT	11	0.92045	0.963829	0.946237	1	0.0302012	0.957629
1716	10.49	12.31	20.57	12.09	6.907	tr|A0A0G2K3H5|A0A0G2K3H5_RAT	Protein Sin3a OS=Rattus norvegicus GN=Sin3a PE=1 SV=1	RAT	10	0.751623	0.672977	0.954993	0.855067	0.131497	0.808665
1717	10.49	11.67	39.57	29.41	18.98	tr|D3ZAZ0|D3ZAZ0_RAT	Eukaryotic translation initiation factor 3 subunit M OS=Rattus norvegicus GN=Eif3m PE=1 SV=1	RAT	8	0.972747	0.912011	1.23595	1.14815	0.122203	1.06721
1718	10.48	10.97	23.22	14.7	6.603	tr|D3ZBL5|D3ZBL5_RAT	Type I inositol 3,4-bisphosphate 4-phosphatase OS=Rattus norvegicus GN=Inpp4a PE=1 SV=3	RAT	6	0.613762	1.18032	0.870964	1.78649	0.393203	1.11288
1719	10.47	12.88	48.77	37.93	33.5	tr|D4A2G9|D4A2G9_RAT	Protein Ranbp1 OS=Rattus norvegicus GN=Ranbp1 PE=1 SV=1	RAT	10	1.01859	1.10662	0.895365	0.972747	0.0766039	0.998332
1720	10.45	13.58	43.12	26.98	17.72	sp|Q6AXS3|DEK_RAT	Protein DEK OS=Rattus norvegicus GN=Dek PE=1 SV=1	RAT	10	0.937562	0.946237	0.895365	0.912011	0.0219179	0.922794
1721	10.45	12.75	32.57	22.12	16.28	tr|A0A0G2K4R9|A0A0G2K4R9_RAT	EGF domain-specific O-linked N-acetylglucosamine transferase OS=Rattus norvegicus GN=Eogt PE=1 SV=1	RAT	11	0.963829	0.990832	0.937562	0.963829	0.0195378	0.964013
1722	10.44	17.53	42.74	38.75	32.76	tr|Q5XFX7|Q5XFX7_RAT	Protein Rad23a OS=Rattus norvegicus GN=Rad23a PE=1 SV=1	RAT	10	1.00925	0.981748	1.01859	0.981748	0.0164581	0.997835
1723	10.44	13.82	37.82	34.1	21.2	sp|Q6AYD6|PDLI2_RAT	PDZ and LIM domain protein 2 OS=Rattus norvegicus GN=Pdlim2 PE=1 SV=1	RAT	6	0.887156	0.972747	0.794328	0.862979	0.0725551	0.879302
1724	10.44	10.64	25.48	18.36	12.88	tr|D3ZRE3|D3ZRE3_RAT	Casein kinase I isoform alpha OS=Rattus norvegicus GN=Csnk1a1 PE=1 SV=1	RAT	5	1.04713	1.00925	0.990832	0.963829	0.0302012	1.00276
1725	10.43	12.27	27.33	21.65	12.31	tr|F7FMS0|F7FMS0_RAT	Protein Mst1 OS=Rattus norvegicus GN=Mst1 PE=3 SV=1	RAT	7	0.448745	0.636796	0.608135	0.92045	0.260039	0.653531
1726	10.43	11.03	29.06	16.97	8.303	tr|G3V9M1|G3V9M1_RAT	DEAD (Asp-Glu-Ala-Asp) box polypeptide 23 (Predicted), isoform CRA_b OS=Rattus norvegicus GN=Ddx23 PE=1 SV=1	RAT	8	0.972747	1.00925	0.963829	1	0.0189858	0.986457
1727	10.42	16.17	29.83	19.78	13.29	tr|D3ZUM4|D3ZUM4_RAT	Beta-galactosidase OS=Rattus norvegicus GN=Glb1 PE=1 SV=1	RAT	11	1.04713	1.03753	0.972747	0.972747	0.0346943	1.00754
1728	10.39	16.64	58.72	48.51	39.57	sp|Q5I0E7|TMED9_RAT	Transmembrane emp24 domain-containing protein 9 OS=Rattus norvegicus GN=Tmed9 PE=1 SV=1	RAT	12	0.928966	0.937562	0.887156	0.887156	0.0255474	0.91021
1729	10.38	11.44	34.74	17.05	8.333	tr|F1LYZ8|F1LYZ8_RAT	Protein Ppp1r21 OS=Rattus norvegicus GN=Ppp1r21 PE=1 SV=3	RAT	9	1.00925	0.972747	1.03753	1.00925	0.0228316	1.0072
1730	10.36	11.87	23.73	13.42	8.637	sp|B2GUZ1|UBP4_RAT	Ubiquitin carboxyl-terminal hydrolase 4 OS=Rattus norvegicus GN=Usp4 PE=1 SV=1	RAT	7	0.912011	0.903649	1.08643	1.07647	0.087398	0.994638
1731	10.36	11.51	43.97	35.18	19.87	sp|Q5RJR8|LRC59_RAT	Leucine-rich repeat-containing protein 59 OS=Rattus norvegicus GN=Lrrc59 PE=1 SV=1	RAT	7	1.18032	1.28233	1.11686	1.20226	0.0494876	1.19544
1732	10.35	12.64	46.63	29.27	23.32	tr|B1H248|B1H248_RAT	Vacuolar protein-sorting-associated protein 36 OS=Rattus norvegicus GN=Vps36 PE=1 SV=1	RAT	11	1.08643	1	1.08643	1	0.0414228	1.04321
1733	10.35	10.49	55.03	37.57	35.98	sp|B2RZ37|REEP5_RAT	Receptor expression-enhancing protein 5 OS=Rattus norvegicus GN=Reep5 PE=1 SV=1	RAT	11	0.946237	1.1272	0.691831	0.809096	0.181476	0.89359
1734	10.33	10.81	70.48	59.05	54.29	tr|D4A5L9|D4A5L9_RAT	Protein LOC679794 OS=Rattus norvegicus GN=LOC679794 PE=3 SV=1	RAT	12	1.38038	1.40605	1.19124	1.20226	0.0762375	1.29498
1735	10.33	10.53	26.65	16.32	7.784	tr|B2GV01|B2GV01_RAT	Metastasis-associated gene family, member 2 OS=Rattus norvegicus GN=Mta2 PE=1 SV=1	RAT	5	1.07647	1.03753	1.00925	0.981748	0.0341678	1.02625
1736	10.33	10.45	42.9	35.05	31.12	tr|F8WFR6|F8WFR6_RAT	Glycogenin-1 OS=Rattus norvegicus GN=Gyg1 PE=1 SV=1	RAT	9	0.724436	1.07647	0.580764	0.862979	0.225366	0.811161
1737	10.31	13.99	37.45	22.51	16.02	tr|F1LSK6|F1LSK6_RAT	Cytochrome P450 20A1 OS=Rattus norvegicus GN=Cyp20a1 PE=1 SV=1	RAT	10	0.963829	1.02802	0.937562	1	0.0350642	0.982352
1738	10.3	15.71	32.72	27.36	17.49	tr|Q7TQ77|Q7TQ77_RAT	Ac1288 OS=Rattus norvegicus GN=Hook3 PE=1 SV=1	RAT	14	0.972747	0.963829	0.981748	0.972747	0.00651267	0.972768
1739	10.3	10.73	30.05	18.68	13.75	tr|Q5U313|Q5U313_RAT	Ankyrin repeat domain 13a OS=Rattus norvegicus GN=Ankrd13a PE=1 SV=1	RAT	7	0.954993	0.937562	0.990832	0.972747	0.0205937	0.964033
1740	10.29	10.97	24.74	15.91	7.549	tr|F1LVZ9|F1LVZ9_RAT	Protein Hectd3 OS=Rattus norvegicus GN=Hectd3 PE=1 SV=3	RAT	7	0.912011	1.08643	0.937562	1.10662	0.0857244	1.01066
1741	10.29	10.83	20.45	12.05	6.65	tr|D3ZE49|D3ZE49_RAT	Protein Trappc12 OS=Rattus norvegicus GN=Trappc12 PE=1 SV=1	RAT	7	0.981748	0.981748	0.981748	0.990832	0.00399739	0.984019
1742	10.29	10.38	40.1	29.82	21.55	sp|P47824|P2RX1_RAT	P2X purinoceptor 1 OS=Rattus norvegicus GN=P2rx1 PE=2 SV=1	RAT	9	0.912011	0.928966	0.972747	0.990832	0.0335167	0.951139
1743	10.26	11.76	47.45	28.57	26.53	tr|D4AE79|D4AE79_RAT	Protein Chmp1a OS=Rattus norvegicus GN=Chmp1a PE=1 SV=1	RAT	7	1.51356	1.40605	1.01859	0.937562	0.201422	1.21894
1744	10.25	10.78	24.2	14.6	10.24	tr|F1M4I4|F1M4I4_RAT	Protein Vps51 OS=Rattus norvegicus GN=Vps51 PE=1 SV=2	RAT	10	0.855067	1.1695	1.08643	1.49968	0.200505	1.15267
1745	10.24	12.26	28.4	13.61	7.134	tr|A0A0G2JWP8|A0A0G2JWP8_RAT	DNA topoisomerase 2 OS=Rattus norvegicus GN=Top2a PE=1 SV=1	RAT	12	1.11686	0.92045	1.09648	0.903649	0.0968512	1.00936
1746	10.24	10.95	49.37	31.13	21.7	tr|F1M1H0|F1M1H0_RAT	Protein Dera OS=Rattus norvegicus GN=Dera PE=1 SV=3	RAT	5	0.981748	1.01859	0.954993	1	0.0237473	0.988833
1747	10.23	10.42	33.99	19.84	11.59	tr|D4A2N1|D4A2N1_RAT	Arginyl-tRNA--protein transferase 1 OS=Rattus norvegicus GN=Ate1 PE=1 SV=1	RAT	5	1.01859	0.954993	1.01859	0.946237	0.0346626	0.984603
1748	10.21	10.38	42.49	34.19	21.41	sp|B2RYW9|FAHD2_RAT	Fumarylacetoacetate hydrolase domain-containing protein 2 OS=Rattus norvegicus GN=Fahd2 PE=1 SV=1	RAT	7	1.02802	0.946237	1.04713	0.954993	0.0443716	0.994094
1749	10.2	12.94	21.33	12.9	7.908	tr|F1LPG3|F1LPG3_RAT	Phosphofurin acidic cluster sorting protein 1 OS=Rattus norvegicus GN=Pacs1 PE=1 SV=1	RAT	7	0.990832	0.972747	0.972747	0.954993	0.0130253	0.97283
1750	10.2	10.84	64.86	45.95	30.41	sp|P18445|RL27A_RAT	60S ribosomal protein L27a OS=Rattus norvegicus GN=Rpl27a PE=1 SV=3	RAT	6	1.02802	0.972747	1.03753	0.972747	0.0301173	1.00276
1751	10.2	10.36	66.67	50.69	46.53	tr|D3ZE15|D3ZE15_RAT	Protein LOC100911483 OS=Rattus norvegicus GN=LOC100911483 PE=1 SV=1	RAT	8	0.954993	0.963829	0.937562	0.946237	0.0102973	0.950655
1752	10.19	15.91	34.28	26.95	19.15	tr|D4A5V8|D4A5V8_RAT	Mitogen-activated protein kinase OS=Rattus norvegicus GN=Mapk9 PE=1 SV=1	RAT	10	1	1.00925	0.954993	0.963829	0.0234781	0.982019
1753	10.18	14.8	28.25	14.4	7.198	tr|D4A3V5|D4A3V5_RAT	Protein Cgnl1 OS=Rattus norvegicus GN=Cgnl1 PE=1 SV=1	RAT	11	0.990832	0.972747	1.02802	1	0.0200046	0.997899
1754	10.18	14.54	48.83	40.85	38.5	sp|P51146|RAB4B_RAT	Ras-related protein Rab-4B OS=Rattus norvegicus GN=Rab4b PE=2 SV=1	RAT	8	1.04713	1.08643	1.00925	1.04713	0.02605	1.04748
1755	10.17	11.54	38.1	29.59	22.11	tr|A0A0G2K121|A0A0G2K121_RAT	Malectin OS=Rattus norvegicus GN=Mlec PE=1 SV=1	RAT	8	1	0.981748	0.990832	0.972747	0.0102973	0.986332
1756	10.17	10.26	62.24	49.79	36.93	sp|P11348|DHPR_RAT	Dihydropteridine reductase OS=Rattus norvegicus GN=Qdpr PE=1 SV=1	RAT	6	0.887156	0.990832	0.816582	0.912011	0.0690563	0.901645
1757	10.17	10.19	45.71	36.57	30.86	sp|Q5XIF3|NDUS4_RAT	NADH dehydrogenase [ubiquinone] iron-sulfur protein 4, mitochondrial OS=Rattus norvegicus GN=Ndufs4 PE=1 SV=1	RAT	5	0.990832	1.01859	0.912011	0.946237	0.0422781	0.966918
1758	10.16	10.34	26.86	17.61	12.64	tr|A0A096MJK4|A0A096MJK4_RAT	Synaptonemal complex protein SC65 OS=Rattus norvegicus GN=P3h4 PE=4 SV=1	RAT	6	0.903649	0.954993	0.928966	0.981748	0.0308881	0.942339
1759	10.15	12.8	70.55	60.74	49.08	sp|Q6PEC4|SKP1_RAT	S-phase kinase-associated protein 1 OS=Rattus norvegicus GN=Skp1 PE=1 SV=3	RAT	8	1.04713	1.07647	1.03753	1.0666	0.0145621	1.05693
1760	10.15	11.69	55.11	40.88	34.67	sp|G3V7P1|STX12_RAT	Syntaxin-12 OS=Rattus norvegicus GN=Stx12 PE=1 SV=1	RAT	12	0.972747	1.0666	0.887156	0.981748	0.065013	0.977062
1761	10.13	12.29	28.88	16.81	12.93	tr|F8WFP9|F8WFP9_RAT	ERO1-like protein alpha OS=Rattus norvegicus GN=Ero1a PE=1 SV=3	RAT	7	1.04713	0.990832	0.990832	0.946237	0.0360151	0.993757
1762	10.11	12.61	21.42	12.59	7.537	tr|F1LUU1|F1LUU1_RAT	Protein Itga11 OS=Rattus norvegicus GN=Itga11 PE=3 SV=3	RAT	9	0.751623	0.831764	0.903649	1	0.10497	0.871759
1763	10.1	15.91	36.18	27.13	15.5	tr|Q66H41|Q66H41_RAT	Protein Snx7 OS=Rattus norvegicus GN=Snx7 PE=1 SV=1	RAT	10	1	0.963829	1	0.963829	0.0184186	0.981915
1764	10.09	10.29	55.9	38.43	30.57	sp|Q6AYK6|CYBP_RAT	Calcyclin-binding protein OS=Rattus norvegicus GN=Cacybp PE=1 SV=1	RAT	7	0.912011	0.928966	0.954993	0.963829	0.0219179	0.93995
1765	10.07	10.85	38.58	26.77	19.29	sp|Q566E5|KDEL2_RAT	KDEL motif-containing protein 2 OS=Rattus norvegicus GN=Kdelc2 PE=2 SV=1	RAT	11	1.01859	1.00925	0.990832	0.972747	0.0176421	0.997856
1766	10.07	10.75	28.85	17.34	12.41	sp|D2XV59|GTPB1_RAT	GTP-binding protein 1 OS=Rattus norvegicus GN=Gtpbp1 PE=1 SV=1	RAT	7	1.00925	1.02802	1.02802	1.04713	0.0130253	1.0281
1767	10.07	10.4	57.73	39.69	34.02	sp|Q6GQP4|RAB31_RAT	Ras-related protein Rab-31 OS=Rattus norvegicus GN=Rab31 PE=1 SV=2	RAT	5	0.912011	0.937562	1.02802	1.05682	0.0613764	0.983602
1768	10.06	13.31	41.94	30.77	23.08	tr|A0A0H2UHI7|A0A0H2UHI7_RAT	ATPase family AAA domain-containing protein 1 OS=Rattus norvegicus GN=Atad1 PE=1 SV=1	RAT	10	0.963829	0.83946	1.09648	0.954993	0.0944536	0.96369
1769	10.06	12.33	25.4	16.52	12.97	tr|A0A0G2QC17|A0A0G2QC17_RAT	Protein phosphatase 2C, magnesium dependent, catalytic subunit, isoform CRA_a OS=Rattus norvegicus GN=Pdp1 PE=1 SV=1	RAT	9	1.03753	1.04713	1	1.01859	0.017642	1.02581
1770	10.06	12.21	25.92	17.17	9.217	tr|F1M7B8|F1M7B8_RAT	Protein Ube3a OS=Rattus norvegicus GN=Ube3a PE=1 SV=2	RAT	8	1.00925	1.01859	0.954993	0.972747	0.0263038	0.988896
1771	10.06	12.17	32.34	21.56	17.66	sp|Q5U2R0|MAT2B_RAT	Methionine adenosyltransferase 2 subunit beta OS=Rattus norvegicus GN=Mat2b PE=2 SV=1	RAT	7	0.879023	0.912011	0.954993	0.990832	0.0453396	0.934214
1772	10.06	11.01	45.6	37.6	23.2	sp|Q5RK30|SBDS_RAT	Ribosome maturation protein SBDS OS=Rattus norvegicus GN=Sbds PE=2 SV=1	RAT	6	1.04713	1.04713	0.847227	0.847227	0.105525	0.947178
1773	10.06	10.22	45.34	32.39	27.13	tr|B1WC84|B1WC84_RAT	Canopy 4 homolog (Zebrafish) OS=Rattus norvegicus GN=Cnpy4 PE=1 SV=1	RAT	6	1.04713	1.07647	1.04713	1.07647	0.0138146	1.0618
1774	10.05	10.21	46.88	40	37.5	tr|B2GV92|B2GV92_RAT	Prostaglandin E synthase 3 OS=Rattus norvegicus GN=Ptges3 PE=1 SV=1	RAT	9	1.10662	1.25893	1.0666	1.20226	0.0656445	1.1586
1775	10.05	10.13	23.57	13.86	9.705	tr|G3V9E5|G3V9E5_RAT	Steroid sulfatase OS=Rattus norvegicus GN=Sts PE=1 SV=1	RAT	8	0.954993	1.03753	0.92045	1	0.0453396	0.978243
1776	10.03	13.81	23.77	14.5	7.654	tr|D3ZIC4|D3ZIC4_RAT	Protein phosphatase 1 regulatory subunit OS=Rattus norvegicus GN=Ppp1r12b PE=1 SV=1	RAT	13	0.912011	0.92045	0.895365	0.903649	0.0102973	0.907869
1777	10.02	12.56	31.09	19.82	13.27	tr|B2GV57|B2GV57_RAT	Protein Cars2 OS=Rattus norvegicus GN=Cars2 PE=1 SV=1	RAT	8	0.946237	0.972747	0.928966	0.946237	0.0164992	0.948547
1778	10.02	10.98	39.6	28.19	16.55	sp|P36876|2ABA_RAT	Serine/threonine-protein phosphatase 2A 55 kDa regulatory subunit B alpha isoform OS=Rattus norvegicus GN=Ppp2r2a PE=2 SV=1	RAT	7	1.00925	1.07647	0.972747	1.02802	0.0365934	1.02162
1779	10.02	10.2	77.97	56.78	46.61	tr|B5DES0|B5DES0_RAT	Protein Snrpd2 OS=Rattus norvegicus GN=Snrpd2 PE=1 SV=1	RAT	9	0.954993	0.946237	0.990832	0.972747	0.017729	0.966202
1780	10.01	12.31	19.66	13.52	9.37	sp|Q4AE70|CARM1_RAT	Histone-arginine methyltransferase CARM1 OS=Rattus norvegicus GN=Carm1 PE=1 SV=1	RAT	7	1.03753	1.00925	1.13763	1.11686	0.0496485	1.07532
1781	10.01	12.06	46.85	37.39	30.18	tr|M0RCH6|M0RCH6_RAT	Uncharacterized protein OS=Rattus norvegicus GN=Chmp4b PE=1 SV=2	RAT	10	1.18032	1.34276	0.801678	0.92045	0.200229	1.0613
1782	10.01	10.46	32.53	12.53	9.6	tr|D3Z8X6|D3Z8X6_RAT	Protein Dtx3l OS=Rattus norvegicus GN=Dtx3l PE=1 SV=1	RAT	7	0.972747	0.963829	0.928966	0.928966	0.0209904	0.948627
1783	10.01	10.23	29.61	14.81	14.56	tr|A0A096MJY6|A0A096MJY6_RAT	Protein Gbe1 (Fragment) OS=Rattus norvegicus GN=Gbe1 PE=1 SV=1	RAT	7	1.09648	1.07647	1.00925	0.990832	0.0424361	1.04326
1784	10.01	10.09	32.24	22.95	14.75	tr|D4ADE5|D4ADE5_RAT	Histone-lysine N-methyltransferase SETD7 OS=Rattus norvegicus GN=Setd7 PE=1 SV=1	RAT	6	1.03753	1.1272	0.903649	0.972747	0.0816094	1.01028
1785	10	17.23	30.99	21.28	16.9	sp|P08934|KNG1_RAT	Kininogen-1 OS=Rattus norvegicus GN=Kng1 PE=2 SV=1	RAT	10	0.654636	0.625173	0.666807	0.630957	0.0263955	0.644393
1786	10	14.98	30.07	18.3	10.5	sp|B4F795|CTL2_RAT	Choline transporter-like protein 2 OS=Rattus norvegicus GN=Slc44a2 PE=2 SV=1	RAT	10	1.00925	0.954993	1.01859	0.954993	0.0301173	0.984457
1787	10	12.58	26.6	19.61	14.76	sp|Q5FWT1|FA98A_RAT	Protein FAM98A OS=Rattus norvegicus GN=Fam98a PE=2 SV=1	RAT	6	0.895365	0.963829	0.946237	1.02802	0.0494876	0.958362
1788	10	11.37	22.86	16.13	12.1	tr|D4A3P1|D4A3P1_RAT	Protein Ubqln4 OS=Rattus norvegicus GN=Ubqln4 PE=1 SV=1	RAT	6	0.92045	0.981748	0.92045	0.972747	0.0301173	0.948849
1789	10	10.81	27.45	16.27	12.75	sp|P70582|NUP54_RAT	Nuclear pore complex protein Nup54 OS=Rattus norvegicus GN=Nup54 PE=1 SV=1	RAT	7	1.01859	1.01859	0.92045	0.92045	0.0506136	0.96952
1790	10	10.75	35.91	27.52	21.81	tr|Q569C9|Q569C9_RAT	Golgi phosphoprotein 3 OS=Rattus norvegicus GN=Golph3 PE=1 SV=1	RAT	7	0.981748	1.09648	0.928966	1.03753	0.0617503	1.01118
1791	10	10.56	32.12	18.49	15.57	sp|Q6AYC2|IRGM_RAT	Immunity-related GTPase family M protein OS=Rattus norvegicus GN=Irgm PE=2 SV=1	RAT	8	1.01859	0.946237	1.08643	1.00925	0.0489481	1.01513
1792	10	10.14	38.65	24.23	17.18	tr|B5DEK0|B5DEK0_RAT	Protein Rprd1b OS=Rattus norvegicus GN=Rprd1b PE=1 SV=1	RAT	5	0.954993	0.963829	1.02802	1.04713	0.0398436	0.998492
1793	10	10.13	39.14	28.95	23.68	tr|D4A830|D4A830_RAT	Protein Ppa2 OS=Rattus norvegicus GN=Ppa2 PE=1 SV=2	RAT	5	0.946237	1.00925	1.02802	1.09648	0.0524984	1.02
1794	10	10.1	27.67	19.5	16.35	tr|M0RBK1|M0RBK1_RAT	Phosphoribosyl pyrophosphate synthetase 1-like 1 (Predicted) OS=Rattus norvegicus GN=Prps1l1 PE=3 SV=1	RAT	6	1.08643	1.09648	1.04713	1.04713	0.0209904	1.06929
1795	10	10.07	34.71	32.35	29.41	tr|F1M5V2|F1M5V2_RAT	Protein Glipr2 OS=Rattus norvegicus GN=Glipr2 PE=1 SV=3	RAT	6	1.33045	1.01859	1.25893	0.972747	0.133165	1.14518
1796	10	10.05	47.52	38.61	38.61	tr|B2RZ77|B2RZ77_RAT	Dermatopontin (Predicted), isoform CRA_a OS=Rattus norvegicus GN=Dpt PE=1 SV=1	RAT	10	0.990832	1.15878	0.751623	0.895365	0.155907	0.949149
1797	10	10.01	46.02	34.66	28.98	sp|P62718|RL18A_RAT	60S ribosomal protein L18a OS=Rattus norvegicus GN=Rpl18a PE=2 SV=1	RAT	7	1.1272	1	1	0.912011	0.0759642	1.0098
1798	10	10	28.52	23.1	21.66	tr|B2RYA8|B2RYA8_RAT	LOC689593 protein OS=Rattus norvegicus GN=Dnajb2 PE=1 SV=1	RAT	5	0.887156	1.04713	0.887156	1.04713	0.0827037	0.967142
1799	9.98	13.28	25.96	14.85	11.42	tr|F1LRI7|F1LRI7_RAT	AP2-associated protein kinase 1 OS=Rattus norvegicus GN=Aak1 PE=1 SV=2	RAT	10	0.972747	0.946237	1.02802	1	0.0308881	0.98675
1800	9.97	12.98	32.52	25.61	18.5	tr|Q5XI21|Q5XI21_RAT	Protein Tom1 OS=Rattus norvegicus GN=Tom1 PE=1 SV=1	RAT	7	0.981748	0.92045	0.937562	0.879023	0.0396107	0.929696
1801	9.97	10.55	34.09	21.22	18.96	tr|F1LPC8|F1LPC8_RAT	Netrin-1 OS=Rattus norvegicus GN=Ntn1 PE=4 SV=2	RAT	9	0.990832	1.09648	0.937562	1.04713	0.0585607	1.018
1802	9.96	10.02	39.19	32.43	27.93	tr|G3V9P0|G3V9P0_RAT	26S proteasome non-ATPase regulatory subunit 9 OS=Rattus norvegicus GN=Psmd9 PE=1 SV=1	RAT	5	0.946237	0.981748	1.05682	1.09648	0.0582062	1.02032
1803	9.94	14.82	29.42	18.78	11.42	tr|D4A1Q9|D4A1Q9_RAT	Protein Ttll12 OS=Rattus norvegicus GN=Ttll12 PE=1 SV=1	RAT	8	0.895365	0.928966	1.02802	1.07647	0.0743981	0.982203
1804	9.94	11.08	20.08	10.5	3.908	tr|F1LMD9|F1LMD9_RAT	Cyclin-G-associated kinase OS=Rattus norvegicus GN=Gak PE=1 SV=1	RAT	7	0.946237	0.946237	1	1	0.027624	0.973119
1805	9.94	10.41	62.05	43.08	37.44	tr|G3V7P6|G3V7P6_RAT	Nudix (Nucleoside diphosphate linked moiety X)-type motif 16 (Predicted), isoform CRA_a OS=Rattus norvegicus GN=Nudt16 PE=1 SV=1	RAT	7	0.946237	1	1	1.0666	0.0425376	1.00321
1806	9.94	10.3	80.2	75.25	66.34	sp|P05942|S10A4_RAT	Protein S100-A4 OS=Rattus norvegicus GN=S100a4 PE=2 SV=1	RAT	14	1.35519	1.28233	1.65959	1.57036	0.104716	1.46687
1807	9.93	12.12	33.93	24.92	16.52	tr|Q6P685|Q6P685_RAT	Eukaryotic translation initiation factor 2, subunit 2 (Beta) OS=Rattus norvegicus GN=Eif2s2 PE=1 SV=1	RAT	7	1.02802	1.00925	1.0666	1.03753	0.0200046	1.03535
1808	9.93	11.26	33.78	23.33	16.89	tr|E9PU13|E9PU13_RAT	Protein Snx4 OS=Rattus norvegicus GN=Snx4 PE=1 SV=1	RAT	8	0.981748	1.03753	1	1.05682	0.02912	1.01902
1809	9.93	10.22	31.14	16.08	10.67	tr|Q5U2R9|Q5U2R9_RAT	Protein Scfd2 OS=Rattus norvegicus GN=Scfd2 PE=1 SV=1	RAT	6	0.92045	0.937562	0.990832	1	0.0352387	0.962211
1810	9.91	11.9	55.1	30.61	23.98	sp|P84100|RL19_RAT	60S ribosomal protein L19 OS=Rattus norvegicus GN=Rpl19 PE=1 SV=1	RAT	9	1.09648	1.09648	1	1	0.0460192	1.04824
1811	9.91	11.63	38.21	31.66	17.47	tr|G3V644|G3V644_RAT	NADH dehydrogenase (Ubiquinone) flavoprotein 3-like, isoform CRA_a OS=Rattus norvegicus GN=Ndufv3 PE=1 SV=1	RAT	9	1	1.05682	0.946237	1	0.0390737	1.00076
1812	9.91	10.97	23.4	19	14	sp|Q9EPB1|DPP2_RAT	Dipeptidyl peptidase 2 OS=Rattus norvegicus GN=Dpp7 PE=1 SV=1	RAT	6	1.35519	1.13763	1.27057	1.0666	0.0930774	1.2075
1813	9.91	9.97	38.11	31.97	26.64	tr|B4F757|B4F757_RAT	RCG37690 OS=Rattus norvegicus GN=Rnd3 PE=1 SV=1	RAT	6	1	1.01859	1.01859	1.04713	0.0164992	1.02108
1814	9.9	16.15	45.13	37.66	29.55	tr|G3V8Q1|G3V8Q1_RAT	Coatomer protein complex, subunit epsilon (Predicted), isoform CRA_c OS=Rattus norvegicus GN=Cope PE=1 SV=3	RAT	11	0.954993	1.05682	0.928966	1.02802	0.0524697	0.992198
1815	9.9	10.35	25.7	16.2	8.838	tr|Q5RKG9|Q5RKG9_RAT	Eukaryotic translation initiation factor 4B OS=Rattus norvegicus GN=Eif4b PE=1 SV=1	RAT	5	0.912011	1.10662	1.11686	1.35519	0.139943	1.12267
1816	9.89	26.83	43.41	28	19.53	sp|P09811|PYGL_RAT	Glycogen phosphorylase, liver form OS=Rattus norvegicus GN=Pygl PE=1 SV=5	RAT	26	1.04713	1.03753	1.1272	1.11686	0.0371119	1.08218
1817	9.89	12.11	28.32	18.05	7.519	tr|A0A0G2K3U1|A0A0G2K3U1_RAT	AMP deaminase 2 OS=Rattus norvegicus GN=Ampd2 PE=1 SV=1	RAT	8	1.00925	0.954993	1.03753	0.981748	0.0308881	0.99588
1818	9.89	10.67	35.02	31.77	26.35	sp|Q9JHW0|PSB7_RAT	Proteasome subunit beta type-7 OS=Rattus norvegicus GN=Psmb7 PE=1 SV=1	RAT	8	0.990832	0.981748	0.937562	0.937562	0.0255474	0.961926
1819	9.89	10.25	26.4	15.86	10.41	tr|D4A978|D4A978_RAT	Phosphoinositide phospholipase C OS=Rattus norvegicus GN=Plcd3 PE=1 SV=1	RAT	7	1.09648	1	1.10662	1	0.0484424	1.05078
1820	9.89	9.99	76.36	55.76	49.09	tr|B2RYU2|B2RYU2_RAT	Protein LOC102555453 OS=Rattus norvegicus GN=Rpl12 PE=1 SV=1	RAT	6	1.10662	1.22462	0.903649	1.00925	0.111802	1.06104
1821	9.88	10.4	55.8	41.99	37.02	tr|A0A0G2K724|A0A0G2K724_RAT	Malignant T-cell-amplified sequence OS=Rattus norvegicus GN=Mcts1 PE=1 SV=1	RAT	6	0.954993	0.990832	0.954993	0.990832	0.0184186	0.972912
1822	9.87	15.81	27.91	18.97	13.1	sp|O35274|NEB2_RAT	Neurabin-2 OS=Rattus norvegicus GN=Ppp1r9b PE=1 SV=1	RAT	10	0.895365	0.972747	0.928966	1.00925	0.0453396	0.951583
1823	9.87	9.96	60.87	47.1	42.03	sp|B0BN94|F136A_RAT	Protein FAM136A OS=Rattus norvegicus GN=Fam136a PE=1 SV=1	RAT	5	0.946237	0.887156	0.981748	0.92045	0.0371221	0.933898
1824	9.86	15.13	34.57	21.81	11.84	tr|A0A0G2K777|A0A0G2K777_RAT	Protein Rhot1 OS=Rattus norvegicus GN=Rhot1 PE=1 SV=1	RAT	10	0.946237	1.00925	1.00925	1.08643	0.0490627	1.01279
1825	9.85	17.58	57.6	45.85	34.1	sp|P07323|ENOG_RAT	Gamma-enolase OS=Rattus norvegicus GN=Eno2 PE=1 SV=2	RAT	18	1.03753	1.03753	1.04713	1.04713	0.00460515	1.04233
1826	9.84	10.08	35.19	17.28	13.27	tr|B5DF95|B5DF95_RAT	Family with sequence similarity 164, member A OS=Rattus norvegicus GN=Zc2hc1a PE=1 SV=1	RAT	6	0.981748	0.963829	0.981748	0.954993	0.0119488	0.970579
1827	9.83	11.93	25.71	19.61	9.807	tr|D3ZAE6|D3ZAE6_RAT	Protein Vasn OS=Rattus norvegicus GN=Vasn PE=1 SV=1	RAT	6	0.946237	0.937562	0.981748	0.972747	0.0189858	0.959574
1828	9.83	11.43	34.64	20.1	10.13	tr|F7ES73|F7ES73_RAT	Protein Nub1 OS=Rattus norvegicus GN=Nub1 PE=1 SV=1	RAT	9	0.990832	0.937562	1.01859	0.954993	0.0322212	0.975494
1829	9.82	12.31	32.57	22.48	18.57	sp|Q9ES53|UFD1_RAT	Ubiquitin fusion degradation protein 1 homolog OS=Rattus norvegicus GN=Ufd1l PE=1 SV=1	RAT	7	0.912011	0.954993	0.937562	0.981748	0.0268505	0.946578
1830	9.81	12.08	58.2	40.21	30.69	tr|D4A565|D4A565_RAT	NADH dehydrogenase (Ubiquinone) 1 beta subcomplex, 5 (Predicted), isoform CRA_b OS=Rattus norvegicus GN=Ndufb5 PE=1 SV=1	RAT	6	0.862979	0.549541	0.751623	0.47863	0.232874	0.660693
1831	9.8	13.64	21.5	10.58	5.323	tr|D4A022|D4A022_RAT	Protein Gapvd1 OS=Rattus norvegicus GN=Gapvd1 PE=1 SV=3	RAT	12	0.954993	0.972747	0.954993	0.972747	0.00921007	0.96387
1832	9.8	12.72	35.76	25.48	17.77	sp|Q9QUR2|DCTN4_RAT	Dynactin subunit 4 OS=Rattus norvegicus GN=Dctn4 PE=1 SV=1	RAT	10	0.990832	1	1	1	0.00397899	0.997708
1833	9.8	12.05	54.5	40.54	22.52	tr|B2RZB5|B2RZB5_RAT	Chromatin modifying protein 2A OS=Rattus norvegicus GN=Chmp2a PE=1 SV=1	RAT	7	0.972747	0.981748	1.24738	1.24738	0.121463	1.11232
1834	9.8	9.94	27.08	19.24	14.73	tr|G3V9W5|G3V9W5_RAT	Phosphatidylinositol 5-phosphate 4-kinase type-2 gamma OS=Rattus norvegicus GN=Pip4k2c PE=1 SV=1	RAT	7	0.981748	0.92045	0.963829	0.903649	0.0335167	0.942419
1835	9.76	16.49	36.17	27.02	19.83	tr|A0A096MJN4|A0A096MJN4_RAT	Protein Sept4 OS=Rattus norvegicus GN=Sept4 PE=1 SV=1	RAT	9	0.92045	0.903649	0.963829	0.946237	0.0247966	0.933541
1836	9.75	11.41	52.88	38.85	24.46	tr|E9PT79|E9PT79_RAT	Protein Tsn OS=Rattus norvegicus GN=Tsn PE=1 SV=3	RAT	7	0.954993	0.946237	0.928966	0.928966	0.0119794	0.939791
1837	9.75	10.32	71.91	49.44	32.02	tr|B2GV73|B2GV73_RAT	Actin-related protein 2/3 complex subunit 3 OS=Rattus norvegicus GN=Arpc3 PE=1 SV=1	RAT	9	1.09648	1.0666	0.981748	0.954993	0.0569132	1.02495
1838	9.73	10.38	35.13	22.01	16.63	tr|F1M944|F1M944_RAT	Calsequestrin OS=Rattus norvegicus GN=Casq2 PE=1 SV=2	RAT	8	1.21339	1.47231	1.05682	1.28233	0.118724	1.25621
1839	9.7	9.81	55.56	35.9	35.9	tr|B2RZD4|B2RZD4_RAT	60S ribosomal protein L34 OS=Rattus norvegicus GN=Rpl34 PE=2 SV=1	RAT	6	1	1.01859	0.946237	0.963829	0.02912	0.982164
1840	9.69	10.13	32.12	25.13	13.99	tr|R9PXV9|R9PXV9_RAT	Protein phosphatase methylesterase 1 OS=Rattus norvegicus GN=Ppme1 PE=1 SV=2	RAT	7	0.862979	0.751623	1.11686	0.981748	0.146415	0.928303
1841	9.68	27.08	53.62	43.89	36.85	tr|A0A0G2K7G7|A0A0G2K7G7_RAT	Septin-8 OS=Rattus norvegicus GN=Sept8 PE=1 SV=1	RAT	28	0.972747	0.946237	1	0.972747	0.0195378	0.972933
1842	9.68	12.06	30.26	18.67	12.88	tr|G3V8P5|G3V8P5_RAT	Protein RGD1310127 OS=Rattus norvegicus GN=RGD1310127 PE=1 SV=1	RAT	7	0.954993	0.990832	0.990832	1.01859	0.0228316	0.988812
1843	9.65	16.06	54.05	40.99	33.78	sp|D3ZBN0|H15_RAT	Histone H1.5 OS=Rattus norvegicus GN=Hist1h1b PE=1 SV=1	RAT	11	0.954993	0.937562	0.903649	0.887156	0.02912	0.92084
1844	9.63	14.15	16.57	8.756	4.57	sp|P49793|NUP98_RAT	Nuclear pore complex protein Nup98-Nup96 OS=Rattus norvegicus GN=Nup98 PE=1 SV=2	RAT	11	0.912011	0.928966	0.963829	0.972747	0.0263038	0.944388
1845	9.63	9.92	45.69	40.1	28.68	sp|Q6JE36|NDRG1_RAT	Protein NDRG1 OS=Rattus norvegicus GN=Ndrg1 PE=1 SV=1	RAT	13	1.09648	1.0666	0.903649	0.870964	0.0999261	0.984422
1846	9.61	9.77	32.73	27.31	15.86	tr|A0A0H2UI26|A0A0H2UI26_RAT	Metalloreductase STEAP3 OS=Rattus norvegicus GN=Steap3 PE=1 SV=1	RAT	10	1.43219	1.1272	0.895365	0.698232	0.263389	1.03825
1847	9.6	9.71	31.55	26.18	23.03	sp|P43138|APEX1_RAT	DNA-(apurinic or apyrimidinic site) lyase OS=Rattus norvegicus GN=Apex1 PE=1 SV=2	RAT	7	1.01859	0.981748	0.963829	0.937562	0.0302012	0.975433
1848	9.59	11.83	57.61	39.92	39.92	sp|Q9Z269|VAPB_RAT	Vesicle-associated membrane protein-associated protein B OS=Rattus norvegicus GN=Vapb PE=1 SV=3	RAT	9	0.862979	0.954993	0.636796	0.717794	0.155946	0.79314
1849	9.58	10.77	26.82	11.15	5.438	tr|Q7TP51|Q7TP51_RAT	Ab2-232 OS=Rattus norvegicus GN=Ube4a PE=1 SV=1	RAT	8	1.02802	0.946237	1.02802	0.954993	0.0392436	0.989316
1850	9.57	12.71	27.71	18.67	8.434	tr|G3V9H0|G3V9H0_RAT	Ras GTPase-activating protein 1 OS=Rattus norvegicus GN=Rasa1 PE=1 SV=2	RAT	8	1.01859	0.990832	0.963829	0.946237	0.0279859	0.979872
1851	9.57	10.6	25.99	14.59	13.26	sp|P53610|PGTB1_RAT	Geranylgeranyl transferase type-1 subunit beta OS=Rattus norvegicus GN=Pggt1b PE=1 SV=1	RAT	7	0.847227	1.09648	0.824138	1.0666	0.128989	0.95861
1852	9.57	10.5	30.83	19.88	13.18	sp|O70199|UGDH_RAT	UDP-glucose 6-dehydrogenase OS=Rattus norvegicus GN=Ugdh PE=1 SV=1	RAT	6	1.05682	1.03753	1.04713	1.02802	0.0102973	1.04237
1853	9.54	9.78	21.89	14.26	8.126	tr|F1LRE2|F1LRE2_RAT	Insulin-like growth factor binding protein, acid labile subunit, isoform CRA_b OS=Rattus norvegicus GN=Igfals PE=1 SV=2	RAT	5	0.937562	0.887156	0.990832	0.937562	0.0390737	0.938278
1854	9.52	10.04	26.34	14.98	7.335	tr|A0A0H2UHQ3|A0A0H2UHQ3_RAT	Microtubule-associated protein 1S OS=Rattus norvegicus GN=Map1s PE=1 SV=1	RAT	9	0.724436	0.862979	0.895365	1.07647	0.140972	0.889811
1855	9.49	12	29.87	18.94	12.39	tr|Q5XIN4|Q5XIN4_RAT	Myotubularin related protein 9 OS=Rattus norvegicus GN=Mtmr9 PE=1 SV=1	RAT	6	0.895365	0.895365	1.08643	1.09648	0.098759	0.993408
1856	9.46	10.43	37.46	26.35	19.05	sp|P23711|HMOX2_RAT	Heme oxygenase 2 OS=Rattus norvegicus GN=Hmox2 PE=1 SV=1	RAT	6	0.946237	0.879023	1.02802	0.954993	0.0554458	0.952067
1857	9.44	15.03	26.82	15.97	9.654	sp|Q6MG08|ABCF1_RAT	ATP-binding cassette sub-family F member 1 OS=Rattus norvegicus GN=Abcf1 PE=1 SV=1	RAT	11	1	1.01859	1.13763	1.13763	0.0600874	1.07346
1858	9.44	12.2	42.65	35	25.88	tr|A0A0G2K2A5|A0A0G2K2A5_RAT	Protein Uchl5 OS=Rattus norvegicus GN=Uchl5 PE=1 SV=1	RAT	6	1.0666	1.04713	1.00925	0.990832	0.02912	1.02845
1859	9.41	10.89	25.7	16.72	8.669	tr|B1H264|B1H264_RAT	Protein Tbc1d17 OS=Rattus norvegicus GN=Tbc1d17 PE=1 SV=1	RAT	7	0.92045	0.937562	1.02802	1.04713	0.0559712	0.983289
1860	9.39	10.7	26.88	16.63	13.21	tr|O70188|O70188_RAT	Nuclear factor 1 OS=Rattus norvegicus GN=Nfic PE=1 SV=2	RAT	6	1.05682	0.937562	1.02802	0.912011	0.0613764	0.983602
1861	9.38	12.51	23.26	13.76	10.35	tr|G3V9D7|G3V9D7_RAT	Adducin 3 (Gamma), isoform CRA_a OS=Rattus norvegicus GN=Add3 PE=1 SV=1	RAT	9	1.04713	1.03753	0.912011	0.903649	0.0691222	0.975079
1862	9.37	9.7	28.7	16.73	10.04	sp|Q8CHN6|SGPL1_RAT	Sphingosine-1-phosphate lyase 1 OS=Rattus norvegicus GN=Sgpl1 PE=2 SV=1	RAT	6	0.981748	0.887156	1.02802	0.928966	0.0556156	0.956472
1863	9.36	10.93	39.69	31.04	19.96	sp|Q99P39|NFS1_RAT	Cysteine desulfurase, mitochondrial OS=Rattus norvegicus GN=Nfs1 PE=2 SV=1	RAT	10	1.01859	1.00925	0.928966	0.928966	0.0438584	0.971444
1864	9.36	9.51	32.29	25.78	16.15	tr|D3ZJX5|D3ZJX5_RAT	Protein Timm50 OS=Rattus norvegicus GN=Timm50 PE=1 SV=2	RAT	5	1.87068	2.58226	0.83946	1.0666	0.4336	1.58975
1865	9.35	11.16	29.15	19.6	16.08	sp|Q6AYT7|ABD12_RAT	Monoacylglycerol lipase ABHD12 OS=Rattus norvegicus GN=Abhd12 PE=2 SV=1	RAT	6	0.912011	0.972747	0.77983	0.831764	0.0845508	0.874088
1866	9.34	12.04	35.47	24.14	16.26	sp|D3ZUQ0|RIPL1_RAT	RILP-like protein 1 OS=Rattus norvegicus GN=Rilpl1 PE=1 SV=1	RAT	7	0.954993	1.01859	1.00925	1.07647	0.0424539	1.01483
1867	9.34	10.99	38.97	25.1	15.4	sp|Q6IFW6|K1C10_RAT	Keratin, type I cytoskeletal 10 OS=Rattus norvegicus GN=Krt10 PE=3 SV=1	RAT	12	0.685488	0.765597	0.409261	0.487529	0.245533	0.586969
1868	9.34	9.66	26.81	15.09	8.354	sp|P0CAX5|OPHN1_RAT	Oligophrenin-1 OS=Rattus norvegicus GN=Ophn1 PE=1 SV=1	RAT	6	1.04713	1.28233	1.24738	1.51356	0.13009	1.2726
1869	9.32	11.87	26.33	12.46	7.476	tr|D4AAM0|D4AAM0_RAT	Protein Tnpo3 OS=Rattus norvegicus GN=Tnpo3 PE=1 SV=2	RAT	8	0.928966	0.92045	0.963829	0.954993	0.0189858	0.942059
1870	9.31	11.9	26.05	19.75	13.24	sp|P61621|S61A1_RAT	Protein transport protein Sec61 subunit alpha isoform 1 OS=Rattus norvegicus GN=Sec61a1 PE=2 SV=2	RAT	9	0.972747	0.937562	1.02802	0.990832	0.0332053	0.982289
1871	9.31	11.38	18.43	14.5	14.5	sp|Q9JMB5|ADRM1_RAT	Proteasomal ubiquitin receptor ADRM1 OS=Rattus norvegicus GN=Adrm1 PE=1 SV=2	RAT	6	0.946237	0.990832	0.92045	0.963829	0.0268505	0.955337
1872	9.31	9.82	39.27	26.89	21.45	sp|D4A4T9|CHRD1_RAT	Cysteine and histidine-rich domain-containing protein 1 OS=Rattus norvegicus GN=Chordc1 PE=3 SV=1	RAT	6	0.963829	1	1.00925	1.04713	0.029486	1.00505
1873	9.3	10.18	28.99	20.58	13.89	tr|F1LQ09|F1LQ09_RAT	Protein Atl2 OS=Rattus norvegicus GN=Atl2 PE=1 SV=1	RAT	7	1.03753	1.01859	1.00925	0.981748	0.0198761	1.01178
1874	9.3	9.61	36.6	36.08	26.8	tr|Q5RK24|Q5RK24_RAT	Phosphomevalonate kinase OS=Rattus norvegicus GN=Pmvk PE=1 SV=1	RAT	5	1.08643	1.05682	1.02802	1	0.0308881	1.04281
1875	9.29	10.89	32.78	24.5	22.85	tr|Q99MI5|Q99MI5_RAT	Protein LOC100364487 OS=Rattus norvegicus GN=LOC100912604 PE=1 SV=1	RAT	8	1.00925	1.04713	1.01859	1.05682	0.0189858	1.03295
1876	9.29	10.74	41.62	33.53	25.75	tr|Q925D6|Q925D6_RAT	Mitogen-activated protein kinase kinase 6 OS=Rattus norvegicus GN=Map2k6 PE=1 SV=1	RAT	8	1.05682	0.972747	1.05682	0.972747	0.0414228	1.01478
1877	9.29	10.22	24.96	10.56	4.94	tr|G3V8Y5|G3V8Y5_RAT	DNA-directed RNA polymerase OS=Rattus norvegicus GN=Polr2b PE=1 SV=1	RAT	7	0.862979	0.895365	1.08643	1.1272	0.116113	0.992992
1878	9.26	11.67	64.13	53.26	39.67	sp|P24049|RL17_RAT	60S ribosomal protein L17 OS=Rattus norvegicus GN=Rpl17 PE=2 SV=3	RAT	10	1.00925	1.05682	0.963829	1.00925	0.032562	1.00979
1879	9.26	9.57	34.91	28.62	22.01	tr|Q05BA4|Q05BA4_RAT	Myadm protein OS=Rattus norvegicus GN=Myadm PE=1 SV=1	RAT	9	1.04713	1.01859	1.00925	0.981748	0.0230251	1.01418
1880	9.25	12.04	13.95	7.06	4.391	tr|E9PTE1|E9PTE1_RAT	Protein Son OS=Rattus norvegicus GN=Son PE=1 SV=2	RAT	8	0.879023	0.801678	0.765597	0.698232	0.0829723	0.786132
1881	9.24	11.55	21.6	11.26	7.201	tr|A0A096MJP9|A0A096MJP9_RAT	Protein Ddi2 OS=Rattus norvegicus GN=Ddi2 PE=1 SV=1	RAT	7	0.972747	0.928966	1.11686	1.05682	0.071543	1.01885
1882	9.24	9.3	26.54	26.54	26.54	tr|F1LMW7|F1LMW7_RAT	Myristoylated alanine-rich C-kinase substrate OS=Rattus norvegicus GN=Marcks PE=1 SV=3	RAT	6	1.0666	1.07647	1.03753	1.04713	0.0145621	1.05693
1883	9.23	10.65	35.31	28.44	18.44	sp|Q32PX2|AIMP2_RAT	Aminoacyl tRNA synthase complex-interacting multifunctional protein 2 OS=Rattus norvegicus GN=Aimp2 PE=2 SV=1	RAT	6	1.77011	1.19124	1.59956	1.09648	0.197366	1.41435
1884	9.23	10.41	32.57	24.86	16.57	sp|Q5RJQ4|SIR2_RAT	NAD-dependent protein deacetylase sirtuin-2 OS=Rattus norvegicus GN=Sirt2 PE=1 SV=1	RAT	7	0.937562	1.00925	0.937562	1.00925	0.0368247	0.973407
1885	9.22	10.96	47.73	35.61	26.14	sp|P22734|COMT_RAT	Catechol O-methyltransferase OS=Rattus norvegicus GN=Comt PE=1 SV=2	RAT	9	0.636796	1.35519	0.824138	1.78649	0.392716	1.15065
1886	9.22	9.28	74.83	58.5	48.98	sp|Q99MC0|PP14A_RAT	Protein phosphatase 1 regulatory subunit 14A OS=Rattus norvegicus GN=Ppp1r14a PE=1 SV=1	RAT	10	1.27057	1.40605	1.15878	1.2942	0.068482	1.2824
1887	9.2	12.48	62.12	56.06	40.91	sp|Q5EGY4|YKT6_RAT	Synaptobrevin homolog YKT6 OS=Rattus norvegicus GN=Ykt6 PE=1 SV=1	RAT	10	1.02802	0.981748	1.01859	0.972747	0.0234781	1.00028
1888	9.2	12.01	19.91	13.49	7.615	tr|A0A0G2JVI4|A0A0G2JVI4_RAT	Protein Fuk OS=Rattus norvegicus GN=Fuk PE=1 SV=1	RAT	10	0.937562	0.870964	1.01859	0.946237	0.0554458	0.943339
1889	9.2	11.62	27.36	20.52	12.38	sp|Q9WU61|CLCC1_RAT	Chloride channel CLIC-like protein 1 OS=Rattus norvegicus GN=Clcc1 PE=1 SV=1	RAT	9	1.1695	0.77983	1.20226	0.794328	0.202542	0.986481
1890	9.19	11.91	24.54	16.6	10.53	sp|Q5M9F8|NTKL_RAT	N-terminal kinase-like protein OS=Rattus norvegicus GN=Scyl1 PE=2 SV=1	RAT	7	0.972747	1.05682	0.990832	1.0666	0.0397499	1.02175
1891	9.18	9.96	23.84	10.5	6.184	tr|D3ZQ59|D3ZQ59_RAT	Nardilysin OS=Rattus norvegicus GN=Nrd1 PE=1 SV=1	RAT	8	0.990832	1.03753	1.00925	1.05682	0.0247966	1.02361
1892	9.18	9.32	52.2	52.2	32.42	tr|A0JN30|A0JN30_RAT	Canopy 2 homolog (Zebrafish) OS=Rattus norvegicus GN=Cnpy2 PE=1 SV=1	RAT	7	0.794328	0.862979	0.912011	0.972747	0.0739108	0.885516
1893	9.17	13.58	30.14	21.51	12.4	sp|Q62991|SCFD1_RAT	Sec1 family domain-containing protein 1 OS=Rattus norvegicus GN=Scfd1 PE=1 SV=1	RAT	8	1	1.01859	0.937562	0.954993	0.0335167	0.977786
1894	9.15	12.79	30.24	15.18	14.01	sp|P25977|UBF1_RAT	Nucleolar transcription factor 1 OS=Rattus norvegicus GN=Ubtf PE=1 SV=1	RAT	13	0.862979	0.879023	0.912011	0.928966	0.02912	0.895745
1895	9.15	10.79	24.23	17.23	9.927	tr|A2VCV7|A2VCV7_RAT	Mannan-binding lectin serine peptidase 2 OS=Rattus norvegicus GN=Masp2 PE=1 SV=1	RAT	7	0.519996	0.613762	0.654636	0.772681	0.141663	0.640269
1896	9.14	9.74	76.06	66.2	52.11	sp|P29419|ATP5I_RAT	ATP synthase subunit e, mitochondrial OS=Rattus norvegicus GN=Atp5i PE=1 SV=3	RAT	6	0.990832	1.10662	0.903649	1	0.0719798	1.00028
1897	9.14	9.72	29.83	16.32	11.82	tr|Q6T5F2|Q6T5F2_RAT	UDP-glucuronosyltransferase OS=Rattus norvegicus GN=Ugt1a2 PE=1 SV=1	RAT	5	1.19124	1.14815	1.15878	1.10662	0.0262656	1.1512
1898	9.13	9.19	34.14	23.13	16.08	sp|Q6AYG3|PRUNE_RAT	Protein prune homolog OS=Rattus norvegicus GN=Prune PE=1 SV=1	RAT	8	0.972747	1.02802	1.01859	1.07647	0.0359652	1.02396
1899	9.12	10.48	30.43	16	12.87	tr|B4F7F1|B4F7F1_RAT	Cstf2 protein OS=Rattus norvegicus GN=Cstf2 PE=1 SV=1	RAT	7	1.10662	1.28233	1.07647	1.25893	0.0766695	1.18109
1900	9.12	9.86	73.08	50	35.9	tr|F1LT35|F1LT35_RAT	Protein RGD1564606 OS=Rattus norvegicus GN=RGD1564606 PE=3 SV=1	RAT	7	1.03753	0.972747	0.831764	0.77983	0.114751	0.905467
1901	9.12	9.69	39.5	30.96	24.56	tr|Q5U214|Q5U214_RAT	Protein Snrpa OS=Rattus norvegicus GN=Snrpa PE=1 SV=1	RAT	8	1.02802	0.937562	1	0.912011	0.0480522	0.969397
1902	9.12	9.18	48.63	42.12	38.01	tr|Q5XID6|Q5XID6_RAT	Protein Sgcg OS=Rattus norvegicus GN=Sgcg PE=2 SV=1	RAT	8	0.954993	1.01859	0.912011	0.972747	0.0396107	0.964586
1903	9.1	9.18	52.8	44.86	35.51	tr|R9PXU9|R9PXU9_RAT	Osteoclast stimulating factor 1, isoform CRA_a OS=Rattus norvegicus GN=Ostf1 PE=1 SV=2	RAT	6	0.990832	1.03753	0.912011	0.954993	0.0474	0.973841
1904	9.08	17.2	57.74	49.61	43.83	sp|P07335|KCRB_RAT	Creatine kinase B-type OS=Rattus norvegicus GN=Ckb PE=1 SV=2	RAT	14	2.1677	1.64437	1.67494	1.25893	0.191286	1.68649
1905	9.08	11.92	28.74	16.8	12.75	tr|B5DEI0|B5DEI0_RAT	Pcyox1l protein OS=Rattus norvegicus GN=Pcyox1l PE=2 SV=1	RAT	7	0.990832	1.00925	0.937562	0.963829	0.0278416	0.975369
1906	9.08	9.93	25.12	22.68	16.1	tr|A0A0G2K3L8|A0A0G2K3L8_RAT	Protein Wdfy1 OS=Rattus norvegicus GN=Wdfy1 PE=1 SV=1	RAT	7	0.963829	1.0666	0.92045	1.02802	0.0567467	0.994723
1907	9.07	9.53	60.12	53.99	48.47	tr|Q5BK77|Q5BK77_RAT	Protein Rarres2 OS=Rattus norvegicus GN=Rarres2 PE=1 SV=1	RAT	9	1.14815	1.00925	1.55597	1.43219	0.169353	1.28639
1908	9.07	9.18	35.92	26.41	13.38	sp|Q923V4|FBX6_RAT	F-box only protein 6 OS=Rattus norvegicus GN=Fbxo6 PE=1 SV=1	RAT	5	1.1272	1.03753	1.04713	0.954993	0.0585395	1.04171
1909	9.06	10.81	39.64	33.78	20.27	tr|A0A0H2UHK2|A0A0H2UHK2_RAT	Membrane-associated progesterone receptor component 1 OS=Rattus norvegicus GN=Pgrmc1 PE=1 SV=1	RAT	6	0.954993	0.928966	0.946237	0.928966	0.0119794	0.939791
1910	9.04	13.69	33.54	21.14	10.57	sp|P09760|FER_RAT	Tyrosine-protein kinase Fer OS=Rattus norvegicus GN=Fer PE=1 SV=2	RAT	12	1.01859	0.887156	1	0.879023	0.0671214	0.946192
1911	9.04	10.44	21.9	12.93	9.515	tr|M0RD63|M0RD63_RAT	Protein Ranbp3 OS=Rattus norvegicus GN=Ranbp3 PE=1 SV=2	RAT	7	0.972747	1.02802	0.928966	0.981748	0.0359652	0.977869
1912	9.04	10.3	48.71	41.94	37.74	sp|Q68FX9|SIR5_RAT	NAD-dependent protein deacylase sirtuin-5, mitochondrial OS=Rattus norvegicus GN=Sirt5 PE=2 SV=1	RAT	10	0.972747	0.937562	1	0.963829	0.0230251	0.968535
1913	9.04	9.17	30.73	19.95	12.84	sp|Q62975|ZPI_RAT	Protein Z-dependent protease inhibitor OS=Rattus norvegicus GN=Serpina10 PE=2 SV=2	RAT	6	0.912011	0.903649	0.972747	0.963829	0.0325528	0.938059
1914	9.02	9.35	38.71	38.71	32.72	sp|P63074|IF4E_RAT	Eukaryotic translation initiation factor 4E OS=Rattus norvegicus GN=Eif4e PE=1 SV=1	RAT	6	0.963829	1.03753	0.903649	0.963829	0.0490627	0.967209
1915	9	10.08	44.71	31.76	24.71	tr|D3ZZR5|D3ZZR5_RAT	Protein LOC100364748 OS=Rattus norvegicus GN=Snrpa1 PE=1 SV=1	RAT	6	0.887156	0.870964	0.862979	0.855067	0.0136623	0.869041
1916	9	9.25	54.05	41.89	35.81	tr|D3ZDU5|D3ZDU5_RAT	Profilin OS=Rattus norvegicus GN=Pfn2 PE=3 SV=1	RAT	5	1.07647	1.05682	0.963829	0.946237	0.0559712	1.01084
1917	9	9.13	69.64	54.46	40.18	tr|A9UMV9|A9UMV9_RAT	Ndufa7 protein OS=Rattus norvegicus GN=Ndufa7 PE=1 SV=1	RAT	5	1	1	0.954993	0.954993	0.0230218	0.977496
1918	9	9.05	33.95	29.89	26.57	tr|D4A650|D4A650_RAT	Protein Msrb3 OS=Rattus norvegicus GN=Msrb3 PE=1 SV=3	RAT	6	1.0666	1.00925	1.08643	1.02802	0.02912	1.04757
1919	8.99	10.94	36.18	25.59	15.88	tr|B0K030|B0K030_RAT	DnaJ (Hsp40) homolog, subfamily B, member 1 (Predicted), isoform CRA_b OS=Rattus norvegicus GN=Dnajb1 PE=1 SV=1	RAT	6	1.01859	1.10662	0.954993	1.02802	0.0524256	1.02706
1920	8.99	10.77	40.26	24.42	22.44	sp|P35426|CDK4_RAT	Cyclin-dependent kinase 4 OS=Rattus norvegicus GN=Cdk4 PE=1 SV=1	RAT	8	1.5417	0.57544	0.937562	0.648634	0.410954	0.925834
1921	8.98	18	34.23	19.23	9.721	sp|E9PTG8|STK10_RAT	Serine/threonine-protein kinase 10 OS=Rattus norvegicus GN=Stk10 PE=1 SV=1	RAT	11	0.963829	0.990832	0.972747	1	0.0145621	0.981852
1922	8.98	10.1	15.83	8.77	5.847	tr|G3V927|G3V927_RAT	Discs, large homolog-associated protein 4 (Drosophila) OS=Rattus norvegicus GN=Dlgap4 PE=1 SV=1	RAT	6	1.01859	1.10662	0.972747	1.0666	0.0483167	1.04114
1923	8.98	9.15	20.97	11.82	9.147	tr|B4F7F3|B4F7F3_RAT	Arvcf protein OS=Rattus norvegicus GN=Arvcf PE=1 SV=1	RAT	8	0.83946	0.895365	0.903649	0.963829	0.0489481	0.900576
1924	8.96	10.82	49.38	39.38	36.88	tr|D4A870|D4A870_RAT	Protein LOC682512 OS=Rattus norvegicus GN=LOC682512 PE=4 SV=1	RAT	8	0.972747	1.00925	0.946237	0.981748	0.0230251	0.977496
1925	8.95	10.56	46.77	44.28	27.86	sp|P40307|PSB2_RAT	Proteasome subunit beta type-2 OS=Rattus norvegicus GN=Psmb2 PE=1 SV=1	RAT	8	0.990832	0.990832	0.981748	0.981748	0.00460516	0.98629
1926	8.95	9.99	32.57	23.61	11.66	tr|Q6MGA3|Q6MGA3_RAT	Antigen peptide transporter 2 OS=Rattus norvegicus GN=Tap2 PE=1 SV=1	RAT	10	0.954993	0.972747	1.03753	1.05682	0.0424361	1.00552
1927	8.93	11.18	19.11	9.946	7.01	tr|F1MA59|F1MA59_RAT	Protein Col4a1 OS=Rattus norvegicus GN=Col4a1 PE=1 SV=1	RAT	20	0.895365	0.912011	0.809096	0.824138	0.0514468	0.860152
1928	8.93	9.14	31.94	26.57	20	tr|Q5M8B4|Q5M8B4_RAT	Ficolin (Collagen/fibrinogen domain containing) 1 OS=Rattus norvegicus GN=Fcna PE=1 SV=1	RAT	6	0.613762	0.711214	0.625173	0.724436	0.0741272	0.668646
1929	8.92	16.21	33.86	23.17	16.44	tr|A0A0G2K007|A0A0G2K007_RAT	STE20/SPS1-related proline-alanine-rich protein kinase OS=Rattus norvegicus GN=Stk39 PE=1 SV=1	RAT	9	0.928966	0.954993	0.972747	1	0.0268505	0.964177
1930	8.91	10.35	30.57	22.29	20.7	sp|O70593|SGTA_RAT	Small glutamine-rich tetratricopeptide repeat-containing protein alpha OS=Rattus norvegicus GN=Sgta PE=1 SV=1	RAT	7	1.04713	1.10662	1.04713	1.10662	0.027624	1.07688
1931	8.9	11.46	19.47	11.43	7.035	tr|Q66HJ7|Q66HJ7_RAT	Receptor-type tyrosine-protein phosphatase OS=Rattus norvegicus GN=Ptpra PE=1 SV=1	RAT	8	1.43219	0.954993	0.440555	0.380189	0.532356	0.801981
1932	8.9	9.6	31.28	17.13	7.487	tr|D3ZD24|D3ZD24_RAT	Protein Syne3 OS=Rattus norvegicus GN=Syne3 PE=4 SV=3	RAT	8	1.08643	0.937562	1.10662	0.954993	0.0741272	1.0214
1933	8.9	9.12	37.1	21.04	13.12	sp|Q6AY97|CCD91_RAT	Coiled-coil domain-containing protein 91 OS=Rattus norvegicus GN=Ccdc91 PE=1 SV=1	RAT	6	0.870964	0.765597	1.31826	1.15878	0.214624	1.0284
1934	8.89	9.29	27.64	14.84	11.69	tr|D4A416|D4A416_RAT	Protein Clptm1l OS=Rattus norvegicus GN=Clptm1l PE=1 SV=1	RAT	7	0.946237	0.903649	0.937562	0.903649	0.0209904	0.922775
1935	8.88	10.52	64.01	55.73	37.26	sp|Q9WVK7|HCDH_RAT	Hydroxyacyl-coenzyme A dehydrogenase, mitochondrial OS=Rattus norvegicus GN=Hadh PE=2 SV=1	RAT	12	1.00925	0.895365	0.895365	0.801678	0.0816983	0.900415
1936	8.88	9.96	51.37	35.52	26.78	tr|D3ZNQ6|D3ZNQ6_RAT	Protein Ube2m OS=Rattus norvegicus GN=Ube2m PE=1 SV=1	RAT	7	0.912011	0.990832	0.954993	1.03753	0.0474	0.973841
1937	8.88	9.07	50	46.47	31.18	sp|Q498E0|TXD12_RAT	Thioredoxin domain-containing protein 12 OS=Rattus norvegicus GN=Txndc12 PE=2 SV=2	RAT	7	0.912011	0.963829	0.847227	0.895365	0.0460454	0.904608
1938	8.88	9.05	31.03	21.61	14.94	tr|M0R485|M0R485_RAT	Protein Pglyrp2 OS=Rattus norvegicus GN=Pglyrp2 PE=1 SV=2	RAT	7	0.625173	0.461318	0.744732	0.549541	0.174741	0.595191
1939	8.86	9.26	22.3	11.67	7.976	tr|B2GV98|B2GV98_RAT	Lrch1 protein OS=Rattus norvegicus GN=Lrch1 PE=1 SV=1	RAT	6	0.990832	1	0.946237	0.954993	0.0234781	0.973015
1940	8.84	12.39	13.43	5.968	4.092	tr|D3ZN76|D3ZN76_RAT	Protein Sec16a OS=Rattus norvegicus GN=Sec16a PE=1 SV=1	RAT	12	0.954993	0.855067	1.07647	0.954993	0.0816983	0.960379
1941	8.84	11.26	22.73	14.52	10.26	tr|D3ZZN3|D3ZZN3_RAT	Acetyl-coenzyme A synthetase OS=Rattus norvegicus GN=Acss1 PE=3 SV=1	RAT	6	0.963829	0.946237	1.05682	1.03753	0.0469337	1.0011
1942	8.84	11.1	30.71	27.52	15.72	sp|P14562|LAMP1_RAT	Lysosome-associated membrane glycoprotein 1 OS=Rattus norvegicus GN=Lamp1 PE=1 SV=1	RAT	9	0.83946	1	0.57544	0.666807	0.211522	0.770427
1943	8.83	13.47	23.84	18.4	9.969	tr|F1LQH2|F1LQH2_RAT	Nuclear factor NF-kappa-B p105 subunit OS=Rattus norvegicus GN=Nfkb1 PE=1 SV=2	RAT	11	0.963829	1.00925	0.895365	0.946237	0.0427462	0.953671
1944	8.83	11.08	42.34	28.47	25.91	sp|P48508|GSH0_RAT	Glutamate--cysteine ligase regulatory subunit OS=Rattus norvegicus GN=Gclm PE=1 SV=1	RAT	7	0.972747	0.954993	1	0.972747	0.0164992	0.975122
1945	8.82	8.87	28.13	19.1	15.28	sp|Q561R9|LACB2_RAT	Beta-lactamase-like protein 2 OS=Rattus norvegicus GN=Lactb2 PE=2 SV=1	RAT	5	1.01859	1	1.03753	1.01859	0.0130253	1.01868
1946	8.81	9.67	52.6	40.1	38.02	tr|G3V8T9|G3V8T9_RAT	Apoptosis regulator BAX OS=Rattus norvegicus GN=Bax PE=1 SV=1	RAT	8	1.03753	0.990832	1.01859	0.981748	0.0220079	1.00717
1947	8.8	10.52	24.59	13.95	13	tr|G3V7Y2|G3V7Y2_RAT	Osteomodulin OS=Rattus norvegicus GN=LOC103690116 PE=4 SV=1	RAT	7	0.772681	0.772681	0.972747	0.972747	0.114623	0.872714
1948	8.79	10.45	24.47	13.23	9.518	tr|A0A0A0MXX8|A0A0A0MXX8_RAT	F-BAR domain only protein 2 OS=Rattus norvegicus GN=Fcho2 PE=1 SV=2	RAT	9	0.937562	0.972747	1.00925	1.04713	0.0411797	0.991673
1949	8.79	10.05	29.07	19.62	10.9	tr|D3ZF54|D3ZF54_RAT	Anoctamin OS=Rattus norvegicus GN=Ano10 PE=1 SV=2	RAT	12	0.981748	0.870964	1	0.887156	0.0605034	0.934967
1950	8.79	8.84	83.48	71.3	53.91	sp|P62890|RL30_RAT	60S ribosomal protein L30 OS=Rattus norvegicus GN=Rpl30 PE=3 SV=2	RAT	6	0.972747	0.972747	0.954993	0.954993	0.00921007	0.96387
1951	8.77	9.07	32.45	22.96	17.68	sp|P43424|GALT_RAT	Galactose-1-phosphate uridylyltransferase OS=Rattus norvegicus GN=Galt PE=2 SV=1	RAT	7	0.963829	0.972747	0.963829	0.963829	0.00399736	0.966059
1952	8.77	9.02	47.68	43.71	39.74	tr|Q6PDV6|Q6PDV6_RAT	40S ribosomal protein S14 OS=Rattus norvegicus GN=LOC100911847 PE=1 SV=1	RAT	10	0.972747	0.990832	0.972747	0.990832	0.0092101	0.98179
1953	8.76	8.94	27.6	20.04	15.88	tr|Q76GL9|Q76GL9_RAT	Amino acid transporter OS=Rattus norvegicus GN=Slc1a4 PE=1 SV=1	RAT	8	0.83946	1	0.855067	1.00925	0.0852563	0.925945
1954	8.74	17.01	23.15	16.5	8.951	tr|D4A3S8|D4A3S8_RAT	NOL1/NOP2/Sun domain family, member 2 (Predicted) OS=Rattus norvegicus GN=Nsun2 PE=1 SV=1	RAT	10	0.963829	0.887156	1.0666	0.972747	0.0654597	0.972582
1955	8.74	8.89	36.16	31.7	23.66	sp|Q8CGV7|THTPA_RAT	Thiamine-triphosphatase OS=Rattus norvegicus GN=Thtpa PE=2 SV=3	RAT	5	0.954993	0.990832	0.963829	1	0.0189858	0.977413
1956	8.73	9.95	32.81	24.49	14.6	tr|A0A0A0MXX0|A0A0A0MXX0_RAT	CD2-associated protein OS=Rattus norvegicus GN=Cd2ap PE=1 SV=2	RAT	9	0.912011	0.831764	0.862979	0.794328	0.0507408	0.85027
1957	8.72	11.99	52.43	42.16	34.05	tr|D4A3T3|D4A3T3_RAT	Protein Cbx1 OS=Rattus norvegicus GN=Cbx1 PE=1 SV=1	RAT	6	0.946237	0.954993	0.870964	0.887156	0.0397499	0.914837
1958	8.72	8.82	59.84	54.33	37.01	sp|Q63396|TCP4_RAT	Activated RNA polymerase II transcriptional coactivator p15 OS=Rattus norvegicus GN=Sub1 PE=1 SV=3	RAT	4	0.963829	0.824138	0.672977	0.586138	0.189607	0.761771
1959	8.71	14.93	44.29	32.42	30.59	sp|Q63942|RAB3D_RAT	GTP-binding protein Rab-3D OS=Rattus norvegicus GN=Rab3d PE=1 SV=2	RAT	9	1.05682	1.07647	1.03753	1.05682	0.0130253	1.05691
1960	8.7	11.57	24.93	9.322	4.088	tr|D4AAG8|D4AAG8_RAT	Protein Smchd1 OS=Rattus norvegicus GN=Smchd1 PE=1 SV=2	RAT	9	0.990832	0.990832	1.01859	1.01859	0.0138146	1.00471
1961	8.7	8.86	26.88	17.19	8.186	tr|Q7TP91|Q7TP91_RAT	Ab1-205 OS=Rattus norvegicus GN=Surf4 PE=1 SV=1	RAT	8	0.912011	0.963829	0.990832	1.04713	0.049802	0.97845
1962	8.7	8.81	29.45	24.92	18.12	tr|A0A096MKH2|A0A096MKH2_RAT	Protein Vta1 OS=Rattus norvegicus GN=Vta1 PE=1 SV=1	RAT	6	0.954993	1.00925	0.928966	0.981748	0.0308881	0.96874
1963	8.69	13.53	38.35	27.43	16.75	tr|Q5M9H7|Q5M9H7_RAT	DnaJ (Hsp40) homolog, subfamily A, member 2 OS=Rattus norvegicus GN=Dnaja2 PE=1 SV=1	RAT	7	1.01859	0.937562	0.963829	0.895365	0.0468179	0.953837
1964	8.69	11.07	73.73	63.56	55.08	tr|A0A0F7RQJ6|A0A0F7RQJ6_RAT	D-dopachrome decarboxylase OS=Rattus norvegicus GN=Ddt PE=1 SV=1	RAT	11	1.0666	1.20226	1.21339	1.36773	0.087952	1.21249
1965	8.69	10.68	44.81	36.79	31.13	tr|Q6AYQ9|Q6AYQ9_RAT	Peptidyl-prolyl cis-trans isomerase OS=Rattus norvegicus GN=Ppic PE=1 SV=1	RAT	9	0.879023	1.11686	0.591562	0.737904	0.232953	0.831338
1966	8.69	9	44.95	36.87	30.3	sp|D3ZW55|ITPA_RAT	Inosine triphosphate pyrophosphatase OS=Rattus norvegicus GN=Itpa PE=3 SV=1	RAT	7	1.04713	0.608135	1.52757	0.83946	0.337147	1.00557
1967	8.68	9.81	20.28	12.22	8.333	tr|A0A0G2K8H0|A0A0G2K8H0_RAT	Caprin-1 OS=Rattus norvegicus GN=Caprin1 PE=1 SV=1	RAT	7	0.990832	0.990832	0.963829	0.972747	0.0119488	0.97956
1968	8.67	11.08	40.18	31.25	24.11	sp|Q9ERR2|COMD5_RAT	COMM domain-containing protein 5 OS=Rattus norvegicus GN=Commd5 PE=2 SV=1	RAT	6	0.895365	0.981748	0.903649	0.990832	0.0462495	0.942899
1969	8.67	10.21	29.46	15.05	13.76	tr|D3ZYS7|D3ZYS7_RAT	Protein G3bp1 OS=Rattus norvegicus GN=G3bp1 PE=1 SV=1	RAT	7	0.879023	0.972747	0.895365	0.990832	0.0514468	0.934492
1970	8.67	8.86	30.95	20.63	15.47	sp|Q63530|PTER_RAT	Phosphotriesterase-related protein OS=Rattus norvegicus GN=Pter PE=2 SV=2	RAT	6	0.963829	0.981748	0.972747	0.990832	0.0102973	0.977289
1971	8.65	12.1	27.33	17.41	12.35	tr|A0A0H2UHR6|A0A0H2UHR6_RAT	Coagulation factor X OS=Rattus norvegicus GN=F10 PE=1 SV=1	RAT	8	0.879023	0.946237	0.887156	0.963829	0.0398436	0.919061
1972	8.64	9.64	50.54	43.01	40.86	tr|B2RYS8|B2RYS8_RAT	NADH dehydrogenase [ubiquinone] 1 beta subcomplex subunit 8, mitochondrial OS=Rattus norvegicus GN=Ndufb8 PE=1 SV=1	RAT	6	0.963829	0.972747	0.895365	0.895365	0.0392753	0.931826
1973	8.63	11.14	94.38	82.02	69.66	tr|B2GVB1|B2GVB1_RAT	Protein S100 OS=Rattus norvegicus GN=S100a6 PE=1 SV=1	RAT	12	1.13763	1.36773	1.18032	1.41906	0.0936878	1.27618
1974	8.62	13.48	67.29	43.93	29.91	sp|Q63507|RL14_RAT	60S ribosomal protein L14 OS=Rattus norvegicus GN=Rpl14 PE=1 SV=3	RAT	10	0.313329	0.272898	0.724436	0.608135	0.399411	0.479699
1975	8.62	8.81	28.91	17.7	6.777	tr|B2GUV2|B2GUV2_RAT	Vacuolar protein sorting 52 (Yeast), isoform CRA_b OS=Rattus norvegicus GN=Vps52 PE=1 SV=1	RAT	5	1.0666	1.04713	1.00925	0.990832	0.02912	1.02845
1976	8.61	8.97	27.91	19.63	13.19	tr|G3V7F1|G3V7F1_RAT	G protein beta subunit-like, isoform CRA_a OS=Rattus norvegicus GN=Mlst8 PE=1 SV=1	RAT	4	0.981748	0.963829	1.05682	1.03753	0.0379605	1.00998
1977	8.61	8.84	32.13	17.87	12.98	sp|Q6AYS6|SNX17_RAT	Sorting nexin-17 OS=Rattus norvegicus GN=Snx17 PE=1 SV=1	RAT	6	0.954993	1	0.946237	0.981748	0.0220079	0.970744
1978	8.6	14.59	35.12	24.91	17.47	sp|Q4KLZ6|TKFC_RAT	Triokinase/FMN cyclase OS=Rattus norvegicus GN=Tkfc PE=1 SV=1	RAT	11	1.05682	1.03753	1.0666	1.04713	0.0102973	1.05202
1979	8.58	12.1	25.45	16.93	9.753	tr|G3V8E2|G3V8E2_RAT	Protein Strip1 OS=Rattus norvegicus GN=Strip1 PE=1 SV=2	RAT	9	0.946237	1.01859	0.954993	1.02802	0.0371119	0.986959
1980	8.58	8.93	29.28	14.32	8.112	tr|D3Z8S0|D3Z8S0_RAT	Protein Sh3d19 OS=Rattus norvegicus GN=Sh3d19 PE=1 SV=1	RAT	6	0.816582	0.92045	0.928966	1.04713	0.087952	0.928282
1981	8.57	12.08	24.8	15.36	10.24	tr|F1MAH5|F1MAH5_RAT	Protein Ppp6r3 OS=Rattus norvegicus GN=Ppp6r3 PE=1 SV=3	RAT	11	1.00925	0.946237	0.981748	0.92045	0.0350642	0.964422
1982	8.57	8.92	23.46	13.53	5.866	sp|Q5PQN1|HERC4_RAT	Probable E3 ubiquitin-protein ligase HERC4 OS=Rattus norvegicus GN=Herc4 PE=2 SV=1	RAT	6	0.954993	1.00925	1.05682	1.1272	0.0610298	1.03707
1983	8.57	8.65	50.32	37.58	29.94	sp|B2GV38|UBL4A_RAT	Ubiquitin-like protein 4A OS=Rattus norvegicus GN=Ubl4a PE=2 SV=1	RAT	6	0.990832	0.946237	1	0.954993	0.0234781	0.973015
1984	8.56	15.35	24.01	15.95	11.84	tr|B5DEJ5|B5DEJ5_RAT	Eefsec protein OS=Rattus norvegicus GN=Eefsec PE=1 SV=1	RAT	9	0.972747	0.946237	1.04713	1.01859	0.039334	0.996176
1985	8.56	11.56	37	24.4	14.48	tr|A0A0G2JYA2|A0A0G2JYA2_RAT	ADP-ribosylation factor interacting protein 1, isoform CRA_b OS=Rattus norvegicus GN=Arfip1 PE=1 SV=1	RAT	6	0.937562	1.00925	0.946237	1.00925	0.0346626	0.975576
1986	8.56	9.14	26.65	16.21	11.68	sp|Q9R1J8|P3H1_RAT	Prolyl 3-hydroxylase 1 OS=Rattus norvegicus GN=P3h1 PE=1 SV=1	RAT	7	0.946237	0.946237	0.990832	0.981748	0.0209904	0.966264
1987	8.56	8.63	31.62	21.34	15.02	sp|Q9QZA6|CD151_RAT	CD151 antigen OS=Rattus norvegicus GN=Cd151 PE=1 SV=2	RAT	5	0.954993	0.912011	0.954993	0.912011	0.0230218	0.933502
1988	8.55	51.77	72.32	65.4	57.37	sp|Q5XIF6|TBA4A_RAT	Tubulin alpha-4A chain OS=Rattus norvegicus GN=Tuba4a PE=1 SV=1	RAT	92	1.05682	0.981748	0.990832	0.92045	0.0489481	0.987462
1989	8.55	9.48	61.24	48.84	42.64	sp|P12075|COX5B_RAT	Cytochrome c oxidase subunit 5B, mitochondrial OS=Rattus norvegicus GN=Cox5b PE=1 SV=2	RAT	8	0.954993	0.92045	1.00925	0.972747	0.0332053	0.964361
1990	8.55	9.27	27.1	16.79	12.79	tr|Q68FX8|Q68FX8_RAT	Mitochondrial-processing peptidase subunit alpha OS=Rattus norvegicus GN=Pmpca PE=1 SV=1	RAT	7	1.02802	1.02802	1	1.00925	0.0119488	1.01632
1991	8.54	12.07	24.8	13.48	6.233	tr|G3V661|G3V661_RAT	Bromodomain adjacent to zinc finger domain protein 1B OS=Rattus norvegicus GN=Baz1b PE=1 SV=1	RAT	12	1.01859	0.912011	1.13763	1.01859	0.0781323	1.02171
1992	8.53	9.26	22.94	11.11	5.199	tr|F7F0B1|F7F0B1_RAT	Zinc finger CCCH-type antiviral protein 1 OS=Rattus norvegicus GN=Zc3hav1 PE=1 SV=1	RAT	4	0.946237	1.04713	0.963829	1.0666	0.0514469	1.00595
1993	8.52	11.2	36.82	31.8	22.59	tr|F1LN70|F1LN70_RAT	Leucine-rich repeat-containing protein 57 OS=Rattus norvegicus GN=Lrrc57 PE=1 SV=3	RAT	7	0.963829	0.981748	0.937562	0.963829	0.0163878	0.961742
1994	8.52	9.05	38.19	22.3	12.8	tr|G3V640|G3V640_RAT	Mitochondrial import inner membrane translocase subunit TIM44 OS=Rattus norvegicus GN=Timm44 PE=1 SV=1	RAT	6	0.903649	0.92045	0.972747	0.990832	0.0379605	0.94692
1995	8.5	8.66	39.1	24.06	9.774	tr|F1MAF5|F1MAF5_RAT	Protein Pcid2 OS=Rattus norvegicus GN=Pcid2 PE=1 SV=2	RAT	5	0.954993	0.92045	1.02802	0.990832	0.0411797	0.973573
1996	8.48	16.09	59.01	43.24	39.19	sp|Q6AXY0|GSTA6_RAT	Glutathione S-transferase A6 OS=Rattus norvegicus GN=Gsta6 PE=1 SV=1	RAT	11	0.903649	0.928966	0.787046	0.801678	0.072303	0.855335
1997	8.47	10.7	19.84	10.54	5.504	tr|G3V845|G3V845_RAT	Phosphoinositide phospholipase C OS=Rattus norvegicus GN=Plcg1 PE=1 SV=1	RAT	9	1.03753	1	1.11686	1.07647	0.0411797	1.05771
1998	8.46	8.69	29.23	16.35	9.231	sp|Q3MID3|ARFG2_RAT	ADP-ribosylation factor GTPase-activating protein 2 OS=Rattus norvegicus GN=Arfgap2 PE=1 SV=1	RAT	5	0.981748	0.937562	0.972747	0.928966	0.0234781	0.955256
1999	8.45	10.84	36.38	18.94	9.468	tr|G3V7I7|G3V7I7_RAT	Protein Lrrc40 OS=Rattus norvegicus GN=Lrrc40 PE=1 SV=3	RAT	6	1.01859	0.981748	1.03753	1	0.0205937	1.00947
[truncated: 2,382 more rows]

## Sheet:  C.V less than 0.5
N	Unused	Total	%Cov	%Cov(50)	%Cov(95)	Accession	Name	Species	Peptides(95%)	115:113	119:113	115:116	119:116	C.V	AVG.
1	441.85	441.85	87.53	81.8	73.78	tr|E9PTU4|E9PTU4_RAT	Myosin-11 OS=Rattus norvegicus GN=Myh11 PE=1 SV=2	RAT	670	0.887156	1.51356	0.625173	1.10662	0.315119	1.03313
2	424.73	420.59	90.94	86.24	82.3	tr|C0JPT7|C0JPT7_RAT	Filamin alpha OS=Rattus norvegicus GN=Flna PE=1 SV=1	RAT	679	1	1	1	1	0	1
4	355.46	354.57	56.03	47.05	40.55	tr|M0R9X8|M0R9X8_RAT	Cytoplasmic dynein 1 heavy chain 1 OS=Rattus norvegicus GN=Dync1h1 PE=1 SV=2	RAT	210	0.879023	0.92045	0.855067	0.895365	0.0268505	0.887476
5	329.91	332.91	79.71	73.67	67.74	tr|A0A0G2JUA5|A0A0G2JUA5_RAT	Protein Ahnak OS=Rattus norvegicus GN=Ahnak PE=1 SV=1	RAT	237	1.14815	0.630957	0.855067	0.469894	0.328214	0.776018
6	302.64	304.26	58.58	49.9	43.81	tr|F1M705|F1M705_RAT	Dystrophin OS=Rattus norvegicus GN=Dmd PE=1 SV=3	RAT	189	1.07647	0.981748	1.00925	0.928966	0.0532177	0.999108
7	294.78	296.04	82.09	76.86	69.62	tr|G3V852|G3V852_RAT	Protein Tln1 OS=Rattus norvegicus GN=Tln1 PE=1 SV=1	RAT	339	1.0666	0.954993	0.954993	0.855067	0.0781323	0.957912
8	220.29	240.52	53.82	44.69	39.02	tr|G3V7L1|G3V7L1_RAT	Protein Utrn OS=Rattus norvegicus GN=Utrn PE=1 SV=3	RAT	154	0.981748	1.0666	0.963829	1.04713	0.0424361	1.01483
9	202.66	208.26	90.81	87.34	78.71	sp|P85972|VINC_RAT	Vinculin OS=Rattus norvegicus GN=Vcl PE=1 SV=1	RAT	294	0.691831	1.57036	0.413047	0.912011	0.476336	0.896813
10	192.78	193.51	39.71	32.96	27.46	tr|G3V928|G3V928_RAT	Protein Lrp1 OS=Rattus norvegicus GN=Lrp1 PE=1 SV=1	RAT	125	0.990832	1.03753	0.963829	1.00925	0.0268505	1.00036
11	192.63	192.57	65.46	60.51	56.92	tr|F1LTJ5|F1LTJ5_RAT	Uncharacterized protein OS=Rattus norvegicus GN=Hspg2 PE=1 SV=3	RAT	216	1.00925	0.903649	1.07647	0.963829	0.0639477	0.988299
12	191.59	277.15	77.55	68.57	59.54	tr|G3V6P7|G3V6P7_RAT	Myosin, heavy polypeptide 9, non-muscle OS=Rattus norvegicus GN=Myh9 PE=1 SV=1	RAT	258	1.03753	1.1695	0.879023	0.990832	0.102176	1.01922
13	184.53	185.58	59.37	51.53	45.4	tr|G3V9M6|G3V9M6_RAT	Fibrillin 1, isoform CRA_a OS=Rattus norvegicus GN=Fbn1 PE=1 SV=1	RAT	223	0.903649	0.654636	1.04713	0.758578	0.176305	0.840998
14	182.38	188.46	37.95	26.82	18.87	sp|Q7TMA5|APOB_RAT	Apolipoprotein B-100 OS=Rattus norvegicus GN=Apob PE=1 SV=1	RAT	101	0.824138	0.990832	0.691831	0.831764	0.126951	0.834641
15	181.75	181.81	62.78	55.55	51.39	tr|A0A096P6L8|A0A096P6L8_RAT	Fibronectin OS=Rattus norvegicus GN=Fn1 PE=1 SV=2	RAT	171	1.25893	1.00925	1.34276	1.08643	0.113053	1.17434
16	171.55	214.03	57.78	50.46	45.12	tr|A0A0H2UHR7|A0A0H2UHR7_RAT	Filamin-C OS=Rattus norvegicus GN=Flnc PE=1 SV=1	RAT	146	1.55597	1.35519	1.41906	1.23595	0.0829723	1.39154
17	168.93	168.87	93.87	88.07	82.39	tr|Q6T487|Q6T487_RAT	Alpha-actinin-1 OS=Rattus norvegicus GN=Actn1 PE=1 SV=1	RAT	226	1.31826	1.27057	1.00925	0.963829	0.136511	1.14048
18	163.67	264.78	77.88	69.69	59.82	tr|G3V9Y1|G3V9Y1_RAT	Myosin, heavy polypeptide 10, non-muscle, isoform CRA_b OS=Rattus norvegicus GN=Myh10 PE=1 SV=1	RAT	216	0.981748	0.83946	0.870964	0.751623	0.095616	0.860949
19	163.45	165.71	71.26	64.82	53.46	tr|M0RBF1|M0RBF1_RAT	Complement C3 OS=Rattus norvegicus GN=C3 PE=1 SV=1	RAT	126	0.487529	0.296483	0.597035	0.363078	0.264912	0.436031
20	162.4	171.21	59.46	44.92	36.32	tr|A0A0G2JZ69|A0A0G2JZ69_RAT	Spectrin alpha chain, non-erythrocytic 1 OS=Rattus norvegicus GN=Sptan1 PE=1 SV=1	RAT	97	1.43219	1.27057	1.28233	1.13763	0.0814501	1.28068
21	149.45	152.6	66.08	59.38	54.07	tr|G3V7Q7|G3V7Q7_RAT	IQ motif containing GTPase activating protein 1 (Predicted), isoform CRA_b OS=Rattus norvegicus GN=Iqgap1 PE=1 SV=1	RAT	129	1.10662	0.954993	0.990832	0.862979	0.0891563	0.978857
22	138.11	139.68	56.63	50.76	47.62	tr|F1LN42|F1LN42_RAT	Protein Tns1 OS=Rattus norvegicus GN=Tns1 PE=1 SV=2	RAT	120	0.772681	0.758578	0.751623	0.737904	0.0166038	0.755196
23	136.38	139.53	65.97	58.57	49.73	tr|F1M779|F1M779_RAT	Clathrin heavy chain OS=Rattus norvegicus GN=Cltc PE=1 SV=1	RAT	132	0.824138	0.744732	0.831764	0.758578	0.0488163	0.789803
25	131.75	134.37	53.11	46.24	39.01	tr|F1LRL9|F1LRL9_RAT	Microtubule-associated protein 1B OS=Rattus norvegicus GN=Map1b PE=1 SV=1	RAT	97	0.981748	0.772681	0.751623	0.591562	0.179099	0.774403
26	131.42	132.28	97.61	95.49	93.1	sp|P62738|ACTA_RAT	Actin, aortic smooth muscle OS=Rattus norvegicus GN=Acta2 PE=2 SV=1	RAT	660	0.737904	0.847227	0.816582	0.937562	0.0856183	0.834819
27	126.88	129.34	49.33	42.12	37	tr|F1M155|F1M155_RAT	Protein Svil OS=Rattus norvegicus GN=Svil PE=1 SV=3	RAT	79	0.809096	0.855067	0.744732	0.787046	0.0498021	0.798985
28	126.2	127.78	50.64	47.21	43.12	sp|Q00657|CSPG4_RAT	Chondroitin sulfate proteoglycan 4 OS=Rattus norvegicus GN=Cspg4 PE=1 SV=2	RAT	106	0.912011	1.22462	1	1.34276	0.153522	1.11985
29	123.33	124.41	87.22	81.95	75.64	tr|G3V8L3|G3V8L3_RAT	Lamin A, isoform CRA_b OS=Rattus norvegicus GN=Lmna PE=1 SV=1	RAT	172	0.946237	0.990832	0.895365	0.937562	0.0359652	0.942499
30	122.91	125.23	44.27	33.19	24.33	tr|F1LQX8|F1LQX8_RAT	Inositol 1,4,5-trisphosphate receptor type 1 OS=Rattus norvegicus GN=Itpr1 PE=1 SV=3	RAT	76	1.38038	1.09648	1.25893	1	0.123629	1.18395
31	117.93	120.72	46.67	37.64	28.82	sp|P12785|FAS_RAT	Fatty acid synthase OS=Rattus norvegicus GN=Fasn PE=1 SV=3	RAT	73	3.56451	3.04789	3.69828	3.16228	0.080283	3.36824
32	117.42	132.61	31.97	18.54	11.16	tr|A0A0G2K9T4|A0A0G2K9T4_RAT	Microtubule-actin cross-linking factor 1 OS=Rattus norvegicus GN=Macf1 PE=1 SV=1	RAT	89	1.05682	1.02802	1.28233	1.25893	0.0993128	1.15652
33	115.15	119.98	49.32	41.89	33.79	tr|D4ACN7|D4ACN7_RAT	Protein Myof OS=Rattus norvegicus GN=Myof PE=1 SV=2	RAT	65	1.34276	1.1272	1.2942	1.08643	0.0892125	1.21265
34	113.01	124.87	47.54	35.4	27.55	tr|G3V6S0|G3V6S0_RAT	Protein Sptbn1 OS=Rattus norvegicus GN=Sptbn1 PE=1 SV=3	RAT	69	1.38038	1.40605	1.23595	1.25893	0.0559711	1.32033
35	108.15	111.71	75.1	65.04	57.95	sp|Q63355|MYO1C_RAT	Unconventional myosin-Ic OS=Rattus norvegicus GN=Myo1c PE=1 SV=2	RAT	98	1	0.855067	1.01859	0.870964	0.0786726	0.936155
36	107.71	112.39	50.28	43.31	38.39	tr|F1MAA7|F1MAA7_RAT	Protein Lamc1 OS=Rattus norvegicus GN=Lamc1 PE=1 SV=1	RAT	76	0.912011	0.954993	0.928966	0.972747	0.0247966	0.942179
37	106.04	105.75	48.55	38.04	30.34	tr|D3ZFU9|D3ZFU9_RAT	Protein Mylk OS=Rattus norvegicus GN=Mylk PE=1 SV=2	RAT	113	0.895365	1.00925	0.765597	0.855067	0.0993156	0.88132
38	101.59	104.07	65.78	58.84	53.63	tr|A0A0G2QC06|A0A0G2QC06_RAT	Serotransferrin OS=Rattus norvegicus GN=Tf PE=1 SV=1	RAT	97	0.946237	1	0.972747	1.02802	0.0308881	0.98675
39	99.56	100.62	82.32	77.41	70.43	tr|Q6IMZ3|Q6IMZ3_RAT	Annexin OS=Rattus norvegicus GN=Anxa6 PE=1 SV=1	RAT	97	1.14815	0.928966	1.13763	0.92045	0.105626	1.0338
40	98.56	102.28	42.74	33.83	27.93	tr|A0A0G2K7B6|A0A0G2K7B6_RAT	Protein Dysf OS=Rattus norvegicus GN=Dysf PE=1 SV=1	RAT	55	1.52757	1.10662	1.58489	1.13763	0.162989	1.33918
41	97.94	103.2	62.78	53.08	42.9	tr|Q3KRF2|Q3KRF2_RAT	High density lipoprotein binding protein (Vigilin) OS=Rattus norvegicus GN=Hdlbp PE=1 SV=1	RAT	57	0.855067	1	0.862979	1.01859	0.080795	0.934159
42	94.83	97.3	29.98	22.38	17.86	tr|F1MAN8|F1MAN8_RAT	Laminin, alpha 5, isoform CRA_a OS=Rattus norvegicus GN=Lama5 PE=1 SV=2	RAT	61	1.0666	1.1695	1.02802	1.1272	0.0495755	1.09783
43	94.41	95.3	84.09	77.07	71.76	sp|P0DMW1|HS71B_RAT	Heat shock 70 kDa protein 1B OS=Rattus norvegicus GN=Hspa1a PE=2 SV=1	RAT	121	1.14815	1.31826	1.01859	1.1695	0.0913735	1.16363
44	94.14	94.39	51.6	46.2	38.67	sp|Q63041|A1M_RAT	Alpha-1-macroglobulin OS=Rattus norvegicus GN=A1m PE=1 SV=1	RAT	71	1.01859	0.613762	1.1272	0.679204	0.253427	0.859689
45	93.88	100.8	87.12	84.76	81.33	sp|P31000|VIME_RAT	Vimentin OS=Rattus norvegicus GN=Vim PE=1 SV=2	RAT	174	0.928966	1.14815	0.744732	0.903649	0.154292	0.931375
46	89.89	91.83	57.82	49.63	42.45	sp|P14046|A1I3_RAT	Alpha-1-inhibitor 3 OS=Rattus norvegicus GN=A1i3 PE=1 SV=1	RAT	89	0.60256	0.60256	0.636796	0.636796	0.027624	0.619678
47	89.72	89.77	90.24	84.71	82.5	sp|Q4V8H8|EHD2_RAT	EH domain-containing protein 2 OS=Rattus norvegicus GN=Ehd2 PE=1 SV=1	RAT	96	1.59956	1.27057	0.972747	0.794328	0.263836	1.1593
48	89.6	100.76	57.13	46.33	33.57	tr|A0A0G2K5N6|A0A0G2K5N6_RAT	Rho-associated protein kinase OS=Rattus norvegicus GN=Rock2 PE=1 SV=1	RAT	60	1.24738	1.22462	1.2942	1.28233	0.0219179	1.26213
49	86.56	89.52	46.75	34.48	29.43	tr|M0R6K0|M0R6K0_RAT	Laminin subunit beta-2 OS=Rattus norvegicus GN=Lamb2 PE=1 SV=1	RAT	59	1.00925	1.01859	0.963829	0.972747	0.0234781	0.991105
50	86.38	89.18	65.91	60.37	50.81	tr|D4ABA5|D4ABA5_RAT	Protein Smtn OS=Rattus norvegicus GN=Smtn PE=1 SV=1	RAT	76	0.981748	0.981748	0.963829	0.972747	0.00762233	0.975018
51	85.58	90.97	53.68	44.44	39.22	tr|G3V6T1|G3V6T1_RAT	Coatomer subunit alpha OS=Rattus norvegicus GN=Copa PE=1 SV=1	RAT	55	1.04713	1.08643	0.954993	0.981748	0.0510971	1.01757
52	84.9	139.87	47.32	40.05	30.84	tr|D3ZA84|D3ZA84_RAT	Protein Tln2 OS=Rattus norvegicus GN=Tln2 PE=1 SV=3	RAT	100	0.937562	0.816582	1.03753	0.903649	0.0856183	0.923831
53	83.75	87.94	67.31	61.67	54.62	sp|Q68FP1|GELS_RAT	Gelsolin OS=Rattus norvegicus GN=Gsn PE=1 SV=1	RAT	102	1	0.879023	0.855067	0.758578	0.0984842	0.873167
54	83.67	84.04	64.34	55.86	45.4	tr|D4A702|D4A702_RAT	Protein Synpo2 OS=Rattus norvegicus GN=Synpo2 PE=1 SV=2	RAT	74	0.928966	0.724436	0.824138	0.642688	0.137596	0.780057
55	83.45	88.24	70.68	62.59	57.35	sp|Q9Z1X1|ESYT1_RAT	Extended synaptotagmin-1 OS=Rattus norvegicus GN=Esyt1 PE=1 SV=1	RAT	71	0.895365	1	1.02802	1.14815	0.0884237	1.01788
56	83.07	85.29	45.15	38.09	29.67	tr|G3V9G5|G3V9G5_RAT	Protein Synm OS=Rattus norvegicus GN=Synm PE=1 SV=2	RAT	51	1.00925	0.963829	0.946237	0.903649	0.0396107	0.955742
57	82.95	90.35	59.19	48.52	33.72	tr|F1M853|F1M853_RAT	Protein Rrbp1 OS=Rattus norvegicus GN=Rrbp1 PE=1 SV=3	RAT	52	1.02802	0.990832	1.09648	1.05682	0.0371221	1.04304
58	81.89	83.59	79.9	70.88	63.6	tr|A0A096MK30|A0A096MK30_RAT	Moesin OS=Rattus norvegicus GN=Msn PE=1 SV=1	RAT	70	1.09648	1.31826	1.02802	1.23595	0.0973781	1.16967
59	80.9	82.03	41.29	32.04	23.75	tr|F1LTF8|F1LTF8_RAT	Protein Lama4 OS=Rattus norvegicus GN=Lama4 PE=1 SV=3	RAT	53	0.895365	0.972747	0.895365	0.981748	0.0438584	0.936306
60	79.24	83.15	72.79	65.33	55.66	sp|P34058|HS90B_RAT	Heat shock protein HSP 90-beta OS=Rattus norvegicus GN=Hsp90ab1 PE=1 SV=4	RAT	80	0.831764	1.1272	0.816582	1.10662	0.151099	0.970542
61	79.04	98.64	28.14	14.98	7.015	tr|D3ZC56|D3ZC56_RAT	Protein Dst OS=Rattus norvegicus GN=Dst PE=1 SV=3	RAT	61	1.21339	1.08643	1.47231	1.31826	0.111223	1.2726
62	77.28	77.36	69.09	59.43	51.31	sp|P53534|PYGB_RAT	Glycogen phosphorylase, brain form (Fragment) OS=Rattus norvegicus GN=Pygb PE=1 SV=3	RAT	71	1.35519	1.11686	1.11686	0.92045	0.136658	1.12734
63	76.72	82.34	74.16	70.34	63.61	sp|P06761|GRP78_RAT	78 kDa glucose-regulated protein OS=Rattus norvegicus GN=Hspa5 PE=1 SV=1	RAT	79	0.937562	1.30617	0.847227	1.15878	0.170072	1.06243
64	76.71	78.86	89.64	82.49	76.46	sp|P11980|KPYM_RAT	Pyruvate kinase PKM OS=Rattus norvegicus GN=Pkm PE=1 SV=3	RAT	64	1.23595	1.23595	1.02802	1.01859	0.0941675	1.12963
65	76.22	81.99	60.97	53.4	43.17	tr|D4A8U7|D4A8U7_RAT	Dynactin 1, isoform CRA_a OS=Rattus norvegicus GN=Dctn1 PE=1 SV=2	RAT	45	1.20226	1.09648	1.00925	0.928966	0.0959437	1.05924
66	75.74	81.36	74.69	62.42	50.79	tr|A0A0G2JTV2|A0A0G2JTV2_RAT	Non-muscle caldesmon OS=Rattus norvegicus GN=Cald1 PE=1 SV=1	RAT	83	0.990832	1.00925	0.963829	0.981748	0.0166038	0.986415
67	75.5	81.2	41.34	30.85	22.33	tr|M3ZCQ2|M3ZCQ2_RAT	U5 small nuclear ribonucleoprotein 200 kDa helicase OS=Rattus norvegicus GN=Snrnp200 PE=1 SV=1	RAT	47	0.990832	0.972747	0.963829	0.954993	0.0136623	0.9706
68	75.22	85.66	37.85	30.18	25.76	tr|D3ZQN7|D3ZQN7_RAT	Protein Lamb1 OS=Rattus norvegicus GN=Lamb1 PE=1 SV=3	RAT	59	0.903649	0.862979	1.01859	0.972747	0.0640893	0.939492
69	75.11	75.55	69.46	65.4	54	sp|O08590|AOC3_RAT	Membrane primary amine oxidase OS=Rattus norvegicus GN=Aoc3 PE=1 SV=4	RAT	93	1	1.05682	0.972747	1.03753	0.0320732	1.01677
70	75.05	75.39	52.15	44.45	37.41	tr|G3V9R2|G3V9R2_RAT	Protein Cfh OS=Rattus norvegicus GN=Cfh PE=1 SV=1	RAT	56	0.57544	0.401791	0.765597	0.534564	0.22873	0.569348
71	74.67	77.33	48.68	37.92	31.43	tr|G3V8G5|G3V8G5_RAT	Golgi apparatus protein 1 OS=Rattus norvegicus GN=Glg1 PE=1 SV=1	RAT	46	1.04713	1.15878	0.954993	1.04713	0.0686438	1.05201
72	73.68	76.33	37.3	27.02	18.24	tr|G3V6H2|G3V6H2_RAT	Pre-mRNA processing factor 8, isoform CRA_a OS=Rattus norvegicus GN=Prpf8 PE=1 SV=1	RAT	48	0.972747	0.92045	0.990832	0.928966	0.0308449	0.953249
73	73.32	74.67	54.84	49.07	43.6	sp|P06685|AT1A1_RAT	Sodium/potassium-transporting ATPase subunit alpha-1 OS=Rattus norvegicus GN=Atp1a1 PE=1 SV=1	RAT	61	1.09648	1.21339	0.855067	0.946237	0.133803	1.02779
74	73.01	75.35	64.8	53.38	46.15	sp|P05197|EF2_RAT	Elongation factor 2 OS=Rattus norvegicus GN=Eef2 PE=1 SV=4	RAT	53	0.903649	1.18032	1.00925	1.28233	0.134304	1.09389
75	72.84	74.47	38.51	32.99	26.08	sp|P08649|CO4_RAT	Complement C4 OS=Rattus norvegicus GN=C4 PE=1 SV=3	RAT	46	0.420727	0.359749	0.559758	0.483059	0.162722	0.455823
76	72.71	75.65	77.02	69.4	57.5	tr|F1LRV4|F1LRV4_RAT	Heat shock 70 kDa protein 4 OS=Rattus norvegicus GN=Hspa4 PE=1 SV=1	RAT	58	1.0666	1.20226	0.990832	1.1272	0.0709047	1.09672
77	72.25	76.53	58.07	48.04	41.22	tr|E9PSX6|E9PSX6_RAT	Calcium-transporting ATPase OS=Rattus norvegicus GN=Atp2a2 PE=1 SV=3	RAT	55	1.10662	0.801678	1.09648	0.801678	0.157605	0.951615
78	72.17	76.37	56.91	39.69	28.63	tr|F1LUA1|F1LUA1_RAT	Protein Eea1 OS=Rattus norvegicus GN=Eea1 PE=1 SV=1	RAT	42	0.981748	0.972747	1.00925	1	0.0145621	0.990937
79	72.12	73.45	38.52	30.66	26.59	tr|D3ZZT9|D3ZZT9_RAT	Protein Col14a1 OS=Rattus norvegicus GN=Col14a1 PE=1 SV=3	RAT	48	0.963829	1.10662	0.737904	0.855067	0.148567	0.915856
80	71.76	72.78	50.97	44.37	37.57	tr|G3V8Y8|G3V8Y8_RAT	Huntingtin interacting protein 1, isoform CRA_a OS=Rattus norvegicus GN=Hip1 PE=1 SV=1	RAT	45	0.972747	0.990832	0.981748	1	0.0102973	0.986332
81	71.06	74.49	69.5	65.61	51.22	tr|A0A0G2JWC7|A0A0G2JWC7_RAT	Protein Fermt2 OS=Rattus norvegicus GN=Fermt2 PE=1 SV=1	RAT	67	0.912011	0.928966	0.772681	0.787046	0.0832185	0.850176
82	70.51	71.72	86.08	75.23	67.45	sp|P15999|ATPA_RAT	ATP synthase subunit alpha, mitochondrial OS=Rattus norvegicus GN=Atp5a1 PE=1 SV=2	RAT	86	0.972747	1.33045	0.724436	0.990832	0.214577	1.00462
83	69.95	71.78	47.42	35.05	26.52	tr|A0A0G2JZI2|A0A0G2JZI2_RAT	Protein Eprs OS=Rattus norvegicus GN=Eprs PE=1 SV=1	RAT	42	1.03753	1.0666	0.937562	0.963829	0.0524697	1.00138
84	69.35	77.68	66.17	56.34	53.23	tr|A0A0A0MY09|A0A0A0MY09_RAT	Endoplasmin OS=Rattus norvegicus GN=Hsp90b1 PE=1 SV=1	RAT	60	0.787046	1.04713	0.794328	1.05682	0.141875	0.92133
85	69.18	124.85	82.99	73.98	70.25	sp|Q9QXQ0|ACTN4_RAT	Alpha-actinin-4 OS=Rattus norvegicus GN=Actn4 PE=1 SV=2	RAT	153	0.83946	1.07647	0.731139	0.946237	0.142389	0.898325
86	68.37	69.14	42.55	33.08	25.79	sp|Q9JLA3|UGGG1_RAT	UDP-glucose:glycoprotein glucosyltransferase 1 OS=Rattus norvegicus GN=Uggt1 PE=1 SV=2	RAT	47	0.787046	0.847227	0.879023	0.946237	0.0663919	0.864883
87	68.2	69.56	54.53	49.09	41.32	tr|Q66HM2|Q66HM2_RAT	AP-2 complex subunit alpha-2 OS=Rattus norvegicus GN=Ap2a2 PE=1 SV=1	RAT	43	1.03753	1.1272	0.972747	1.05682	0.0524984	1.04857
88	68.14	79.02	96.83	94.37	84.51	tr|A0A0G2JX64|A0A0G2JX64_RAT	Tropomyosin 1, alpha, isoform CRA_i OS=Rattus norvegicus GN=Tpm1 PE=1 SV=1	RAT	92	1.00925	0.972747	0.972747	0.937562	0.0260501	0.973077
89	68.11	71.26	81.9	71.75	65.56	tr|F1LPK7|F1LPK7_RAT	Plastin 3 (T-isoform), isoform CRA_a OS=Rattus norvegicus GN=Pls3 PE=1 SV=2	RAT	61	0.981748	1.24738	0.855067	1.08643	0.137929	1.04266
90	67.54	73.41	42.23	26.35	18.79	tr|F7FF45|F7FF45_RAT	Protein Numa1 OS=Rattus norvegicus GN=Numa1 PE=1 SV=2	RAT	43	1.1695	0.765597	1.21339	0.787046	0.211691	0.983883
91	67.54	68.96	60.79	54.66	51.9	tr|Q9WVJ6|Q9WVJ6_RAT	Protein Tgm2 OS=Rattus norvegicus GN=Tgm2 PE=1 SV=1	RAT	53	0.580764	0.469894	0.642688	0.515229	0.118574	0.552144
92	67.49	68.92	80.03	71.12	63.2	sp|Q5RKI0|WDR1_RAT	WD repeat-containing protein 1 OS=Rattus norvegicus GN=Wdr1 PE=1 SV=3	RAT	58	1.39316	1.45881	1.20226	1.25893	0.0770871	1.32829
93	67.14	98.78	83.75	74.77	68.89	sp|P63018|HSP7C_RAT	Heat shock cognate 71 kDa protein OS=Rattus norvegicus GN=Hspa8 PE=1 SV=1	RAT	144	1.02802	1.95884	0.847227	1.65959	0.329826	1.37342
94	67.12	74.22	73.08	60.82	55.88	tr|G3V7U4|G3V7U4_RAT	Lamin-B1 OS=Rattus norvegicus GN=Lmnb1 PE=1 SV=1	RAT	52	0.972747	0.787046	0.855067	0.685488	0.12659	0.825087
95	66.41	67.38	35.34	29.38	26.82	tr|A0A0G2K1G5|A0A0G2K1G5_RAT	Latent transforming growth factor beta binding protein 2, isoform CRA_a OS=Rattus norvegicus GN=Ltbp2 PE=1 SV=1	RAT	52	0.672977	0.801678	0.895365	1.07647	0.170649	0.861621
96	66.21	66.87	56.56	52.72	47.07	sp|Q9ESN0|NIBAN_RAT	Protein Niban OS=Rattus norvegicus GN=Fam129a PE=1 SV=2	RAT	58	1.99526	1.5417	1.25893	0.990832	0.257021	1.44668
97	66.02	71.66	61.03	49.8	37.08	sp|Q63357|MYO1D_RAT	Unconventional myosin-Id OS=Rattus norvegicus GN=Myo1d PE=1 SV=3	RAT	40	1	0.990832	0.855067	0.83946	0.0807001	0.92134
98	65.36	69.56	61.18	54.87	45.95	tr|F1M3D3|F1M3D3_RAT	Heterogeneous nuclear ribonucleoprotein M OS=Rattus norvegicus GN=Hnrnpm PE=1 SV=1	RAT	37	1.07647	0.831764	0.990832	0.772681	0.132274	0.917935
99	65.05	68.34	78.32	70.25	65.59	sp|P10860|DHE3_RAT	Glutamate dehydrogenase 1, mitochondrial OS=Rattus norvegicus GN=Glud1 PE=1 SV=2	RAT	65	0.981748	1.67494	0.887156	1.51356	0.266116	1.26435
100	64.86	64.93	77.42	74.8	72.78	tr|F1LRJ9|F1LRJ9_RAT	Selenium-binding protein 1 OS=Rattus norvegicus GN=Selenbp1 PE=1 SV=2	RAT	64	0.903649	0.724436	0.772681	0.625173	0.132504	0.756485
101	64.68	65.21	58.31	50.5	42.46	sp|Q66X93|SND1_RAT	Staphylococcal nuclease domain-containing protein 1 OS=Rattus norvegicus GN=Snd1 PE=1 SV=1	RAT	45	1.02802	1.07647	1.01859	1.0666	0.0234781	1.04742
102	64.5	72.17	50.08	37.1	29.68	tr|D4A900|D4A900_RAT	Protein Filip1l OS=Rattus norvegicus GN=Filip1l PE=1 SV=2	RAT	42	0.954993	0.990832	0.972747	1.01859	0.0238856	0.984291
103	64.45	68.17	51.98	45.56	41.12	sp|Q5U300|UBA1_RAT	Ubiquitin-like modifier-activating enzyme 1 OS=Rattus norvegicus GN=Uba1 PE=1 SV=1	RAT	50	0.870964	0.963829	0.862979	0.963829	0.0529946	0.9154
104	64.36	65.34	69.46	61.34	52.96	tr|A0A0G2JVH4|A0A0G2JVH4_RAT	MICOS complex subunit Mic60 OS=Rattus norvegicus GN=Immt PE=1 SV=1	RAT	46	1.00925	1.11686	0.772681	0.847227	0.143886	0.936506
105	64.19	68.76	73.57	65.26	57.57	sp|P46462|TERA_RAT	Transitional endoplasmic reticulum ATPase OS=Rattus norvegicus GN=Vcp PE=1 SV=3	RAT	55	1.00925	1.27057	0.847227	1.04713	0.144753	1.04355
106	64.15	67.92	55.12	50.71	46.67	tr|D4ACC2|D4ACC2_RAT	Protein Kank2 OS=Rattus norvegicus GN=Kank2 PE=1 SV=2	RAT	44	1.02802	0.787046	1.00925	0.772681	0.133086	0.899249
107	63.85	66.98	24.76	17.93	13.22	sp|Q9ERB4|CSPG2_RAT	Versican core protein (Fragments) OS=Rattus norvegicus GN=Vcan PE=2 SV=2	RAT	53	1.40605	0.946237	0.990832	0.672977	0.261023	1.00402
108	63.83	67.84	33.3	22.73	15.57	sp|P11497|ACACA_RAT	Acetyl-CoA carboxylase 1 OS=Rattus norvegicus GN=Acaca PE=1 SV=1	RAT	37	1.08643	1.1272	1.07647	1.11686	0.0189858	1.10174
109	63.68	71.59	32	24.42	16.18	tr|D3ZC84|D3ZC84_RAT	Protein Usp9x OS=Rattus norvegicus GN=Usp9x PE=1 SV=1	RAT	46	1.00925	0.990832	1.01859	1	0.0102973	1.00467
110	63.58	67.19	39.86	31.71	26.26	sp|O88280|SLIT3_RAT	Slit homolog 3 protein OS=Rattus norvegicus GN=Slit3 PE=2 SV=1	RAT	38	1.05682	1.24738	1.08643	1.27057	0.0811959	1.1653
111	63.1	64.45	54	47.67	42.87	tr|F1LR02|F1LR02_RAT	Procollagen, type XVIII, alpha 1, isoform CRA_a OS=Rattus norvegicus GN=Col18a1 PE=1 SV=2	RAT	98	1.49968	1.57036	1.58489	1.61436	0.0268906	1.56732
112	63.02	63.97	44.94	38.2	33.72	tr|D4A917|D4A917_RAT	Protein Ltbp4 OS=Rattus norvegicus GN=Ltbp4 PE=1 SV=2	RAT	58	0.787046	1.07647	0.847227	1.14815	0.156782	0.964723
113	62.53	62.6	76.03	67.98	59.14	sp|P04785|PDIA1_RAT	Protein disulfide-isomerase OS=Rattus norvegicus GN=P4hb PE=1 SV=2	RAT	51	0.765597	1.07647	0.724436	1.01859	0.171071	0.896272
114	62.44	69.65	55.3	41.95	37.92	sp|Q32PZ3|UN45A_RAT	Protein unc-45 homolog A OS=Rattus norvegicus GN=Unc45a PE=2 SV=1	RAT	44	1.11686	1.0666	1.02802	0.981748	0.0474	1.04831
115	62.29	62.51	73.53	69.41	65.69	tr|A0A0H2UHM5|A0A0H2UHM5_RAT	Protein disulfide-isomerase OS=Rattus norvegicus GN=Pdia3 PE=1 SV=1	RAT	61	0.870964	1.14815	0.636796	0.847227	0.207534	0.875785
116	61.85	68.18	46.05	37.43	29.21	tr|D4A8H8|D4A8H8_RAT	Cytoplasmic FMR1 interacting protein 1 (Predicted) OS=Rattus norvegicus GN=Cyfip1 PE=1 SV=1	RAT	40	1.05682	1.0666	0.887156	0.903649	0.0852563	0.978555
117	61.81	78.44	84.65	75.69	74.2	tr|Q6P725|Q6P725_RAT	Desmin OS=Rattus norvegicus GN=Des PE=1 SV=1	RAT	108	1.8197	0.887156	2.58226	1.2942	0.385042	1.64583
118	61.72	64.33	42.64	33.88	29.3	tr|F1M820|F1M820_RAT	Sorbin and SH3 domain-containing protein 1 OS=Rattus norvegicus GN=Sorbs1 PE=1 SV=1	RAT	45	1	0.685488	1.00925	0.685488	0.188866	0.845057
119	61.54	65.03	51.45	44.28	35.17	tr|A0A0G2JWJ0|A0A0G2JWJ0_RAT	Protein phosphatase 1 regulatory subunit OS=Rattus norvegicus GN=Ppp1r12a PE=1 SV=1	RAT	44	1.01859	0.824138	0.765597	0.630957	0.172146	0.809821
120	61.44	63.86	45.57	36.55	30.38	sp|Q04462|SYVC_RAT	Valine--tRNA ligase OS=Rattus norvegicus GN=Vars PE=2 SV=2	RAT	33	0.963829	0.972747	0.981748	0.981748	0.00762233	0.975018
121	61.36	62.42	49.76	42.47	38	tr|G3V9F3|G3V9F3_RAT	Myosin phosphatase Rho-interacting protein OS=Rattus norvegicus GN=Mprip PE=1 SV=1	RAT	34	0.744732	0.847227	0.731139	0.83946	0.0670267	0.79064
122	61.32	62.31	46.31	39.57	36.76	tr|F1LM84|F1LM84_RAT	Nidogen-1 OS=Rattus norvegicus GN=Nid1 PE=1 SV=1	RAT	45	0.946237	0.903649	0.928966	0.879023	0.0278416	0.914469
124	60.9	61.72	54	44.55	38.94	sp|Q2PQA9|KINH_RAT	Kinesin-1 heavy chain OS=Rattus norvegicus GN=Kif5b PE=1 SV=1	RAT	37	1	0.990832	1	1	0.00397899	0.997708
125	60.45	60.93	60.43	55.68	50.58	sp|P02454|CO1A1_RAT	Collagen alpha-1(I) chain OS=Rattus norvegicus GN=Col1a1 PE=1 SV=5	RAT	139	1.00925	0.963829	1.00925	0.963829	0.0230218	0.986541
126	60.44	60.6	82.37	81.03	71.43	sp|Q9WVH8|FBLN5_RAT	Fibulin-5 OS=Rattus norvegicus GN=Fbln5 PE=2 SV=1	RAT	113	0.619441	1.01859	0.428549	0.704693	0.307453	0.692819
127	60.02	61.69	39.36	29.63	26.44	tr|D4AEH9|D4AEH9_RAT	Amylo-1, 6-glucosidase, 4-alpha-glucanotransferase (Glycogen debranching enzyme, glycogen storage disease type III) (Predicted), isoform CRA_a OS=Rattus norvegicus GN=Agl PE=1 SV=1	RAT	37	0.972747	1.00925	1	1.02802	0.0198761	1.0025
128	59.67	86.17	49.67	39.88	30.97	tr|D4A5S0|D4A5S0_RAT	Rho-associated protein kinase OS=Rattus norvegicus GN=Rock1 PE=1 SV=3	RAT	55	0.937562	1.04713	1.11686	1.25893	0.106912	1.09012
129	59.51	61.46	49.08	38.12	31.4	tr|Q5BJZ3|Q5BJZ3_RAT	Nicotinamide nucleotide transhydrogenase OS=Rattus norvegicus GN=Nnt PE=1 SV=1	RAT	41	0.895365	0.816582	0.772681	0.711214	0.0839488	0.79896
130	59.5	62.15	49.59	41.06	35.56	tr|Q9ERS3|Q9ERS3_RAT	Voltage-dependent calcium channel subunit alpha-2/delta-1 OS=Rattus norvegicus GN=Cacna2d1 PE=1 SV=1	RAT	51	0.824138	0.772681	0.758578	0.711214	0.0524984	0.766652
131	59.45	59.56	92.03	85.99	81.59	sp|P05065|ALDOA_RAT	Fructose-bisphosphate aldolase A OS=Rattus norvegicus GN=Aldoa PE=1 SV=2	RAT	76	1.13763	1.2942	0.809096	0.912011	0.182643	1.03823
132	59.35	62.84	52.69	41.75	34.47	tr|D3ZH00|D3ZH00_RAT	Calcium-transporting ATPase OS=Rattus norvegicus GN=Atp2b4 PE=1 SV=3	RAT	55	1.0666	0.711214	1.02802	0.672977	0.205405	0.869701
133	59.24	61.75	33.73	24.09	16.89	tr|A0A096P6L9|A0A096P6L9_RAT	Complement C5 OS=Rattus norvegicus GN=C5 PE=1 SV=2	RAT	33	0.559758	0.416869	0.666807	0.496592	0.170839	0.535007
134	59.13	64.07	47.05	33.69	22.92	tr|F1LM33|F1LM33_RAT	Leucine-rich PPR motif-containing protein, mitochondrial OS=Rattus norvegicus GN=Lrpprc PE=1 SV=2	RAT	41	1.18032	1.04713	1.00925	0.895365	0.0984957	1.03302
135	59.06	61.26	43.3	38.33	36.11	tr|A0A0H2UHL3|A0A0H2UHL3_RAT	Adipocyte enhancer-binding protein 1 OS=Rattus norvegicus GN=Aebp1 PE=4 SV=1	RAT	62	1.04713	0.928966	1.10662	0.981748	0.0658889	1.01612
136	58.65	73.09	23.47	12.48	6.854	tr|F1LQI5|F1LQI5_RAT	E3 ubiquitin-protein ligase UBR4 OS=Rattus norvegicus GN=Ubr4 PE=1 SV=1	RAT	40	1.10662	1.1272	1.39316	1.40605	0.112542	1.25826
137	58.52	64.87	55.78	39.64	33.42	tr|D3ZKE6|D3ZKE6_RAT	Sarcolemma associated protein (Predicted) OS=Rattus norvegicus GN=Slmap PE=1 SV=1	RAT	41	0.972747	0.981748	0.963829	0.972747	0.00651267	0.972768
138	58.44	61.41	50.89	42.48	36.7	tr|Q3ZB97|Q3ZB97_RAT	AP complex subunit beta OS=Rattus norvegicus GN=Ap2b1 PE=1 SV=1	RAT	47	0.895365	0.912011	0.824138	0.847227	0.040774	0.869685
139	58.38	62.84	62.44	54.1	49.49	sp|Q9ER34|ACON_RAT	Aconitate hydratase, mitochondrial OS=Rattus norvegicus GN=Aco2 PE=1 SV=2	RAT	50	1.21339	1.57036	1.15878	1.48594	0.12872	1.35712
140	58.25	60.49	83.55	79.58	74.86	sp|P10719|ATPB_RAT	ATP synthase subunit beta, mitochondrial OS=Rattus norvegicus GN=Atp5b PE=1 SV=2	RAT	98	0.887156	1.07647	0.77983	0.928966	0.115878	0.918104
141	58.2	63.73	54.44	46.52	40.96	tr|G3V6S5|G3V6S5_RAT	C-1-tetrahydrofolate synthase, cytoplasmic OS=Rattus norvegicus GN=Mthfd1 PE=1 SV=1	RAT	37	0.794328	0.772681	0.765597	0.744732	0.0230251	0.769334
142	58.17	61.22	54.06	43.7	35.97	sp|Q5XI78|ODO1_RAT	2-oxoglutarate dehydrogenase, mitochondrial OS=Rattus norvegicus GN=Ogdh PE=1 SV=1	RAT	36	0.981748	1.22462	1.00925	1.25893	0.11095	1.11864
143	58.17	58.54	71.17	65.88	58.76	tr|D4ACB8|D4ACB8_RAT	Chaperonin subunit 8 (Theta) (Predicted), isoform CRA_a OS=Rattus norvegicus GN=Cct8 PE=1 SV=1	RAT	39	1.03753	1.0666	0.912011	0.937562	0.0658546	0.988424
144	57.99	58.16	77.05	72.26	64.87	sp|Q62969|PTGIS_RAT	Prostacyclin synthase OS=Rattus norvegicus GN=Ptgis PE=2 SV=1	RAT	70	0.862979	1.21339	0.648634	0.879023	0.224185	0.901006
145	57.97	59.68	31.63	21.38	15.4	tr|A0A0G2KAJ7|A0A0G2KAJ7_RAT	Collagen alpha-1(XII) chain OS=Rattus norvegicus GN=Col12a1 PE=1 SV=1	RAT	42	0.946237	0.758578	1.35519	1.09648	0.210027	1.03912
146	57.45	58.5	34.8	26.69	18.64	tr|D3ZXD2|D3ZXD2_RAT	Protein Abca8 OS=Rattus norvegicus GN=Abca8a PE=1 SV=3	RAT	33	1.14815	0.92045	0.855067	0.691831	0.181194	0.903875
147	57.39	59.42	69.67	64.41	58.26	tr|A0A0G2JV31|A0A0G2JV31_RAT	X-prolyl aminopeptidase (Aminopeptidase P) 1, soluble, isoform CRA_a OS=Rattus norvegicus GN=Xpnpep1 PE=1 SV=1	RAT	56	1.25893	1.01859	0.77983	0.636796	0.256461	0.923536
148	57.11	57.32	78.65	77.55	73.91	tr|G3V7C6|G3V7C6_RAT	Tubulin beta-4B chain OS=Rattus norvegicus GN=Tubb4b PE=1 SV=2	RAT	86	0.816582	0.928966	0.685488	0.772681	0.109494	0.800929
149	56.99	61.12	51.6	33.03	26.95	tr|D4A1B9|D4A1B9_RAT	Structural maintenance of chromosomes protein OS=Rattus norvegicus GN=Smc3 PE=1 SV=1	RAT	33	0.92045	0.928966	0.972747	0.990832	0.0308449	0.953249
150	56.92	57.59	67.28	56.05	48.89	tr|D3ZAF5|D3ZAF5_RAT	Periostin, osteoblast specific factor (Predicted), isoform CRA_a OS=Rattus norvegicus GN=Postn PE=1 SV=1	RAT	61	1.09648	1.24738	1.19124	1.35519	0.0766039	1.22257
151	56.63	61.09	81.39	73.81	71.21	sp|P62630|EF1A1_RAT	Elongation factor 1-alpha 1 OS=Rattus norvegicus GN=Eef1a1 PE=2 SV=1	RAT	61	0.724436	0.77983	0.954993	1.05682	0.151692	0.879019
152	56.59	64.9	61.86	57.29	51.84	tr|F1M953|F1M953_RAT	Stress-70 protein, mitochondrial OS=Rattus norvegicus GN=Hspa9 PE=1 SV=1	RAT	47	1.00925	1.13763	0.887156	1	0.087952	1.00851
153	56.57	60.58	48.7	39.11	28.94	sp|P97536|CAND1_RAT	Cullin-associated NEDD8-dissociated protein 1 OS=Rattus norvegicus GN=Cand1 PE=1 SV=1	RAT	38	1	1.03753	0.946237	0.981748	0.0332052	0.991378
154	56.53	65.57	37.78	25.17	14.8	tr|A0A0G2JY08|A0A0G2JY08_RAT	Protein Myo18a OS=Rattus norvegicus GN=Myo18a PE=1 SV=1	RAT	36	1.09648	0.981748	1.21339	1.07647	0.0754469	1.09202
155	56.46	59.48	49.47	34.14	25.14	sp|Q9Z1M9|SMC1A_RAT	Structural maintenance of chromosomes protein 1A OS=Rattus norvegicus GN=Smc1a PE=1 SV=1	RAT	32	0.92045	0.895365	0.887156	0.870964	0.0200046	0.893483
156	56.41	56.73	42.53	35.24	31.64	tr|A0A0G2K9I6|A0A0G2K9I6_RAT	Ceruloplasmin OS=Rattus norvegicus GN=Cp PE=1 SV=1	RAT	40	0.862979	0.534564	0.879023	0.549541	0.233051	0.706527
157	56.36	58.51	46.73	41.07	35.19	sp|P05708|HXK1_RAT	Hexokinase-1 OS=Rattus norvegicus GN=Hk1 PE=1 SV=4	RAT	38	0.981748	1	1	1.01859	0.0130253	1.00008
158	55.68	64.27	32.06	22.53	16.73	tr|D4A8A0|D4A8A0_RAT	DNA fragmentation factor subunit beta OS=Rattus norvegicus GN=Cad PE=1 SV=2	RAT	36	0.990832	0.990832	1.02802	1.02802	0.0184186	1.00942
159	55.5	55.99	73.88	69.42	66.74	tr|A0A0H2UHM7|A0A0H2UHM7_RAT	Protein LOC100909441 OS=Rattus norvegicus GN=LOC100909441 PE=3 SV=1	RAT	94	0.981748	0.990832	0.895365	0.903649	0.0462495	0.942899
160	55.17	64.64	49.66	35.85	28.3	tr|D4A4Z9|D4A4Z9_RAT	Protein Ktn1 OS=Rattus norvegicus GN=Ktn1 PE=1 SV=2	RAT	39	0.963829	0.990832	0.963829	0.981748	0.0119794	0.975059
161	55.08	61.33	55.84	46.81	36.67	tr|Q5U302|Q5U302_RAT	Catenin (Cadherin associated protein), alpha 1 OS=Rattus norvegicus GN=Ctnna1 PE=1 SV=1	RAT	38	0.981748	0.954993	1.00925	0.981748	0.0195378	0.981935
162	55	56.73	35.63	28.18	24.02	tr|G3V699|G3V699_RAT	Protein transport protein Sec31A OS=Rattus norvegicus GN=Sec31a PE=1 SV=1	RAT	34	1.09648	1.09648	0.946237	0.946237	0.0735497	1.02136
163	54.54	56.49	54.36	46.85	40.11	sp|O35142|COPB2_RAT	Coatomer subunit beta' OS=Rattus norvegicus GN=Copb2 PE=1 SV=3	RAT	40	0.903649	1.00925	0.912011	1.01859	0.0553982	0.960876
164	54.26	54.39	64.12	54.81	48.7	tr|Q5M9H2|Q5M9H2_RAT	Acyl-Coenzyme A dehydrogenase, very long chain OS=Rattus norvegicus GN=Acadvl PE=1 SV=1	RAT	34	0.972747	1.07647	0.862979	0.963829	0.0779647	0.969005
165	54.24	55.55	53.43	47.92	40.27	tr|A0A0G2K8P3|A0A0G2K8P3_RAT	E3 ubiquitin-protein ligase NEDD4 OS=Rattus norvegicus GN=Nedd4 PE=1 SV=1	RAT	35	0.954993	0.928966	0.895365	0.870964	0.0350642	0.912572
166	54.19	55.98	50.05	40.05	30.43	tr|G3V888|G3V888_RAT	ATP-citrate synthase OS=Rattus norvegicus GN=Acly PE=1 SV=1	RAT	31	1.64437	1.77011	1.2942	1.40605	0.12312	1.52868
[truncated: 4,160 more rows]

## Sheet: 1.3-fold upregulated
N	Unused	Total	%Cov	%Cov(50)	%Cov(95)	Accession	Name	Species	Peptides(95%)	115:113	119:113	115:116	119:116	C.V	AVG.
[truncated: 118 more rows]

[truncated: 3 more sheets: 1.3-fold downregulated, 1.5-fold upregulated, 1.5-fold downregulated]
